# Supplementary material for: Pharmacological Mechanism of Shen Huang Chong Ji for Treating Alzheimer’s Disease Based on Network Pharmacology and Experimental Validation
Source: Hindawi journal article supplement (doi:10.1155/2022/9243348), 2022-05-24
Supplement: f1 [file 9243348.f1.pdf]

Supplementary Table 1

## Active Compounds Recognized in SHCJ

| Herb                     | Molecule Name                                                                                                                                               |
|--------------------------|-------------------------------------------------------------------------------------------------------------------------------------------------------------|
| Ginseng Radix et Rhizoma | Loxanol V                                                                                                                                                   |
| Ginseng Radix et Rhizoma | Pisol                                                                                                                                                       |
| Ginseng Radix et Rhizoma | 9-HEXADECENOIC ACID                                                                                                                                         |
| Ginseng Radix et Rhizoma | Methyl myristate                                                                                                                                            |
| Ginseng Radix et Rhizoma | PENTADECYLIC ACID                                                                                                                                           |
| Ginseng Radix et Rhizoma | METHYL LINOLEATE                                                                                                                                            |
| Ginseng Radix et Rhizoma | 2,6-dimethyl-3,7-octadiene-2,6-diol                                                                                                                         |
| Ginseng Radix et Rhizoma | MLI                                                                                                                                                         |
| Ginseng Radix et Rhizoma | Methyl stearate                                                                                                                                             |
| Ginseng Radix et Rhizoma | Methyl palmitelaidate                                                                                                                                       |
| Ginseng Radix et Rhizoma | METHYL PENTADECANOATE                                                                                                                                       |
| Ginseng Radix et Rhizoma | panaxynol                                                                                                                                                   |
| Ginseng Radix et Rhizoma | Dauricine (8CI)                                                                                                                                             |
| Ginseng Radix et Rhizoma | (1S,4E,8E,10R)-4,8,11,11-tetramethylbicyclo[8.1.0]undeca-4,8-diene                                                                                          |
| Ginseng Radix et Rhizoma | neocnidilide                                                                                                                                                |
| Ginseng Radix et Rhizoma | OCT                                                                                                                                                         |
| Ginseng Radix et Rhizoma | 20-Hexadecanoylingenol                                                                                                                                      |
| Ginseng Radix et Rhizoma | [(1S,4R,5R)-5-[[[(2R,3S,4S,5R,6S)-6-(2-acetyl-5-methoxyphenoxy)-3,4,5-trihydroxyoxan-2-yl]methoxy]-3,4-dihydroxyoxolan-3-yl]methyl 3,4,5-trihydroxybenzoate |
| Ginseng Radix et Rhizoma | L-Adenosine                                                                                                                                                 |
| Ginseng Radix et Rhizoma | Kaempferol-3-arabofuranoside                                                                                                                                |
| Ginseng Radix et Rhizoma | 3691-11-0                                                                                                                                                   |
| Ginseng Radix et Rhizoma | Campesteryl ferulate                                                                                                                                        |
| Ginseng Radix et Rhizoma | Elemicin                                                                                                                                                    |
| Ginseng Radix et Rhizoma | Diop                                                                                                                                                        |
| Ginseng Radix et Rhizoma | beta-Humulene                                                                                                                                               |
| Ginseng Radix et Rhizoma | Stigmasterol                                                                                                                                                |
| Ginseng Radix et Rhizoma | Psuedohypericin                                                                                                                                             |
| Ginseng Radix et Rhizoma | beta-sitosterol                                                                                                                                             |
| Ginseng Radix et Rhizoma | beta-caryophyllene                                                                                                                                          |
| Ginseng Radix et Rhizoma | Inermin                                                                                                                                                     |
| Ginseng Radix et Rhizoma | Folinic acid                                                                                                                                                |
| Ginseng Radix et Rhizoma | methyl (Z)-icos-11-enoate                                                                                                                                   |
| Ginseng Radix et Rhizoma | N-Salicylidene-salicylamine                                                                                                                                 |
| Ginseng Radix et Rhizoma | epsilon-Cadinene                                                                                                                                            |
| Ginseng Radix et Rhizoma | kaempferol                                                                                                                                                  |
| Ginseng Radix et Rhizoma | delta-elemene                                                                                                                                               |
| Ginseng Radix et Rhizoma | (1R,4E,7E,11R)-1,5,9,9-tetramethyl-12-oxabicyclo[9.1.0]dodeca-4,7-diene                                                                                     |
| Ginseng Radix et Rhizoma | Chrysanthemaxanthin                                                                                                                                         |
| Ginseng Radix et Rhizoma | 12-O-Nicotinoylisolineolone                                                                                                                                 |
| Ginseng Radix et Rhizoma | TDA                                                                                                                                                         |
| Ginseng Radix et Rhizoma | ginsenoside Ro_qt                                                                                                                                           |
| Ginseng Radix et Rhizoma | (+)-Maalioxide                                                                                                                                              |
| Ginseng Radix et Rhizoma | n-Heptadecanol                                                                                                                                              |
| Ginseng Radix et Rhizoma | 1-HEXADECYNE                                                                                                                                                |
| Ginseng Radix et Rhizoma | 13-Tetradecenyl acetate                                                                                                                                     |
| Ginseng Radix et Rhizoma | 16-Oxoseratenediol                                                                                                                                          |
| Ginseng Radix et Rhizoma | Neohexane                                                                                                                                                   |
| Ginseng Radix et Rhizoma | 2,3,4-Trimethyldecane                                                                                                                                       |
| Ginseng Radix et Rhizoma | 2,3,8-Trimethyldecane                                                                                                                                       |
| Ginseng Radix et Rhizoma | 2,6,10,15-tetramethylheptadecane                                                                                                                            |
| Ginseng Radix et Rhizoma | 2-METHYLTRIDECANE                                                                                                                                           |

|                          |                                                                                                                                                                                            |
|--------------------------|--------------------------------------------------------------------------------------------------------------------------------------------------------------------------------------------|
| Ginseng Radix et Rhizoma | ginsenoside-Rh1                                                                                                                                                                            |
| Ginseng Radix et Rhizoma | ginsenoside-Rh1_qt                                                                                                                                                                         |
| Ginseng Radix et Rhizoma | 20(S)-Ginsenoside-Rh1                                                                                                                                                                      |
| Ginseng Radix et Rhizoma | 20(S)-Ginsenoside-Rh1_qt                                                                                                                                                                   |
| Ginseng Radix et Rhizoma | 20(S)-ginsenoside-Rg2                                                                                                                                                                      |
|                          | (2S,3R,6S,8R,7R,10R,12R,13R,14R,15R)-17-(2S)-2-hydroxy-6-methylhept-5-en-2-yl]-4,4,8,10,14-pentamethyl-2,3,5,6,7,9,11,12,13,15,16,17-dodecahydro-1H-cyclopenta[a]phenanthrene-3,6,12-triol |
| Ginseng Radix et Rhizoma | 20(s)-protopanaxadiol                                                                                                                                                                      |
| Ginseng Radix et Rhizoma | 20(R)-ginsenoside Rg2                                                                                                                                                                      |
| Ginseng Radix et Rhizoma | 20-(S)-Ginsenoside-Rg3                                                                                                                                                                     |
| Ginseng Radix et Rhizoma | 20-(S)-Ginsenoside-Rg3_qt                                                                                                                                                                  |
| Ginseng Radix et Rhizoma | 3,4-Dimethylheptane                                                                                                                                                                        |
| Ginseng Radix et Rhizoma | 3,5-Dimethyl-p-anisic acid                                                                                                                                                                 |
| Ginseng Radix et Rhizoma | 3-O-beta-D-Glucuronopyranosyl gypsogenin                                                                                                                                                   |
| Ginseng Radix et Rhizoma | 3-O-beta-D-Glucuronopyranosyl gypsogenin_qt                                                                                                                                                |
| Ginseng Radix et Rhizoma | 3-Ethyl-3-methylheptane                                                                                                                                                                    |
| Ginseng Radix et Rhizoma | 3-methylheptane                                                                                                                                                                            |
| Ginseng Radix et Rhizoma | 3-methylundecane                                                                                                                                                                           |
| Ginseng Radix et Rhizoma | 4-Methyldodecane                                                                                                                                                                           |
| Ginseng Radix et Rhizoma | 5-Isobutylnonane                                                                                                                                                                           |
| Ginseng Radix et Rhizoma | 5-heptadec-12-enylresorcinol                                                                                                                                                               |
| Ginseng Radix et Rhizoma | 5-methyl-tetradecane                                                                                                                                                                       |
| Ginseng Radix et Rhizoma | 6'-Malonylginsenoside Rd1                                                                                                                                                                  |
| Ginseng Radix et Rhizoma | 6'-Malonylginsenoside Rd1_qt1                                                                                                                                                              |
| Ginseng Radix et Rhizoma | 7-(beta-Xylosyl)cephalomannine                                                                                                                                                             |
| Ginseng Radix et Rhizoma | 7-Tetradecyne                                                                                                                                                                              |
| Ginseng Radix et Rhizoma | 7alpha-L-Rhamnosyl-6-methoxylutcolin                                                                                                                                                       |
| Ginseng Radix et Rhizoma | Nepetin                                                                                                                                                                                    |
| Ginseng Radix et Rhizoma | Acetal                                                                                                                                                                                     |
| Ginseng Radix et Rhizoma | Adenosine triphosphate                                                                                                                                                                     |
| Ginseng Radix et Rhizoma | Aposiopolamine                                                                                                                                                                             |
| Ginseng Radix et Rhizoma | Araloside A                                                                                                                                                                                |
|                          | (4aS,6aR,6aS,6bR,8aR,10S,12aR,14bR)-10-hydroxy-2,2,6a,6b,9,9,12a-heptamethyl-1,3,4,5,6,6a,7,8,8a,10,11,12,13,14b-tetradecahydronicene-4a-carboxylic acid                                   |
| Ginseng Radix et Rhizoma | Argininyl-fructosyl-glucose                                                                                                                                                                |
| Ginseng Radix et Rhizoma | Argininyl-fructosyl-glucose_qt                                                                                                                                                             |
|                          | 5-[(3aS,6R,6aR)-2-keto-1,3,3a,4,6,6a-hexahydrothieno[3,4-d]imidazol-6-yl]valeric acid                                                                                                      |
| Ginseng Radix et Rhizoma | Celabenzine                                                                                                                                                                                |
| Ginseng Radix et Rhizoma | (R)-(-)-Citronellal                                                                                                                                                                        |
| Ginseng Radix et Rhizoma | MAV                                                                                                                                                                                        |
| Ginseng Radix et Rhizoma | Deoxyharringtonine                                                                                                                                                                         |
| Ginseng Radix et Rhizoma | Dianthramine                                                                                                                                                                               |
| Ginseng Radix et Rhizoma | Ditertbutyl phthalate                                                                                                                                                                      |
| Ginseng Radix et Rhizoma | arachidonate                                                                                                                                                                               |
| Ginseng Radix et Rhizoma | Frutinone A                                                                                                                                                                                |
| Ginseng Radix et Rhizoma | Gamma-Selinene                                                                                                                                                                             |
| Ginseng Radix et Rhizoma | ginsenoside La                                                                                                                                                                             |
| Ginseng Radix et Rhizoma | ginsenoside La_qt                                                                                                                                                                          |
| Ginseng Radix et Rhizoma | ginsenoside Ro                                                                                                                                                                             |
| Ginseng Radix et Rhizoma | Ginsenoside-Ra0                                                                                                                                                                            |
| Ginseng Radix et Rhizoma | Gynposide V_qt                                                                                                                                                                             |
| Ginseng Radix et Rhizoma | Ginsenoside-Ra1                                                                                                                                                                            |
| Ginseng Radix et Rhizoma | Ginsenoside-Ra2                                                                                                                                                                            |

|                          |                                                                                                                                                                                                                                                     |
|--------------------------|-----------------------------------------------------------------------------------------------------------------------------------------------------------------------------------------------------------------------------------------------------|
| Ginseng Radix et Rhizoma | Ginsenoside-Ra3                                                                                                                                                                                                                                     |
| Ginseng Radix et Rhizoma | ginsenoside Rb1                                                                                                                                                                                                                                     |
|                          | (3R,5R,8R,9R,10R,12R,13R,14R,17S)-17-[(2S)-2-hydroxy-6-methylhept-5-en-2-yl]-4,4,8,10,14-pentamethyl-2,3,5,6,7,9,11,12,13,15,16,17-dodecahydro-1H-cyclopenta[a]phenanthrene-3,12-diol                                                               |
| Ginseng Radix et Rhizoma | ginsenoside-Rb2                                                                                                                                                                                                                                     |
| Ginseng Radix et Rhizoma | (3S,5R,8R,9R,10R,12R,13R,14R,17S)-17-[(2S)-2-hydroxy-6-methylhept-5-en-2-yl]-4,4,8,10,14-pentamethyl-2,3,5,6,7,9,11,12,13,15,16,17-dodecahydro-1H-cyclopenta[a]phenanthrene-3,12-diol                                                               |
| Ginseng Radix et Rhizoma | Gypenoside LXIX                                                                                                                                                                                                                                     |
| Ginseng Radix et Rhizoma | ginsenoside-Rc                                                                                                                                                                                                                                      |
|                          | [(3S,5R,8R,9R,10R,12R,13R,14R,17S)-3-[(2R,3R,4S,5S,6R)-4,5-dihydroxy-6-(hydroxymethyl)-3-[(2S,3R,4S,5S,6R)-3,4,5-trihydroxy-6-(hydroxymethyl)oxan-2-yl]oxyoxan-2-yl]oxy-12-hydroxy-4,4,8,10,14-pentamethyl-2,3,5,6,7,9,11,12,13,15,1                |
| Ginseng Radix et Rhizoma | Ginsenoside Re                                                                                                                                                                                                                                      |
| Ginseng Radix et Rhizoma | ginsenoside rf                                                                                                                                                                                                                                      |
|                          | (3S,5R,8R,9R,10R,12R,13R,14R,17S)-17-[(2R)-2-hydroxy-6-methylhept-5-en-2-yl]-4,4,8,10,14-pentamethyl-2,3,5,6,7,9,11,12,13,15,16,17-dodecahydro-1H-cyclopenta[a]phenanthrene-3,6,12-triol                                                            |
| Ginseng Radix et Rhizoma | Sanchinoside C1                                                                                                                                                                                                                                     |
| Ginseng Radix et Rhizoma | Ginsenoside-Rg3                                                                                                                                                                                                                                     |
| Ginseng Radix et Rhizoma | Ginsenoside-Rg3_qt                                                                                                                                                                                                                                  |
| Ginseng Radix et Rhizoma | ginsenoside rh2                                                                                                                                                                                                                                     |
|                          | (2R,3S,4S,5R,6R)-2-(hydroxymethyl)-6-[[[(3S,5R,8R,9R,10R,12R,13R,14R,17S)-12-hydroxy-4,4,8,10,14-pentamethyl-17-[(2Z)-6-methylhepta-2,5-dien-2-yl]-2,3,5,6,7,9,11,12,13,15,16,17-dodecahydro-1H-cyclopenta[a]phenanthren-3-yl]oxy]oxane-3,4,5-triol |
| Ginseng Radix et Rhizoma | Ginsenoside-Rh3_qt                                                                                                                                                                                                                                  |
| Ginseng Radix et Rhizoma | Ginsenoside-Rh4                                                                                                                                                                                                                                     |
| Ginseng Radix et Rhizoma | Ginsenoside-Rh4_qt                                                                                                                                                                                                                                  |
| Ginseng Radix et Rhizoma | Ginsenoside-Rs1                                                                                                                                                                                                                                     |
| Ginseng Radix et Rhizoma | Ginsenoside-Rs2                                                                                                                                                                                                                                     |
| Ginseng Radix et Rhizoma | Ginsenoyne A                                                                                                                                                                                                                                        |
| Ginseng Radix et Rhizoma | Ginsenoyne B                                                                                                                                                                                                                                        |
| Ginseng Radix et Rhizoma | Ginsenoyne C                                                                                                                                                                                                                                        |
| Ginseng Radix et Rhizoma | Ginsenoyne D                                                                                                                                                                                                                                        |
| Ginseng Radix et Rhizoma | Ginsenoyne E                                                                                                                                                                                                                                        |
| Ginseng Radix et Rhizoma | Girinimbin                                                                                                                                                                                                                                          |
| Ginseng Radix et Rhizoma | Gomisin B                                                                                                                                                                                                                                           |
| Ginseng Radix et Rhizoma | L-erythro-isocitric acid                                                                                                                                                                                                                            |
| Ginseng Radix et Rhizoma | D-erythro-Isocitric acid                                                                                                                                                                                                                            |
| Ginseng Radix et Rhizoma | malkangunin                                                                                                                                                                                                                                         |
| Ginseng Radix et Rhizoma | Malonylginsenoside Rc                                                                                                                                                                                                                               |
| Ginseng Radix et Rhizoma | Malonylginsenoside Rc_qt1                                                                                                                                                                                                                           |
| Ginseng Radix et Rhizoma | Malonylginsenoside Rd                                                                                                                                                                                                                               |
| Ginseng Radix et Rhizoma | Malonylginsenoside Rd_qt                                                                                                                                                                                                                            |
| Ginseng Radix et Rhizoma | MAL                                                                                                                                                                                                                                                 |

|                          |                                                                                     |
|--------------------------|-------------------------------------------------------------------------------------|
| Ginseng Radix et Rhizoma | Malvic acid                                                                         |
| Ginseng Radix et Rhizoma | GUP                                                                                 |
| Ginseng Radix et Rhizoma | Methyl tricosanoate                                                                 |
| Ginseng Radix et Rhizoma | Mycosinol                                                                           |
| Ginseng Radix et Rhizoma | NN-Dimethyldecanamide                                                               |
| Ginseng Radix et Rhizoma | Nonacosanediol-6,8                                                                  |
| Ginseng Radix et Rhizoma | notoginsenoside R2                                                                  |
| Ginseng Radix et Rhizoma | notoginsenoside R2_qt                                                               |
| Ginseng Radix et Rhizoma | Notoginsenoside R6                                                                  |
| Ginseng Radix et Rhizoma | Stearyl acetate                                                                     |
| Ginseng Radix et Rhizoma | Panaxadiol                                                                          |
| Ginseng Radix et Rhizoma | panaxatriol                                                                         |
| Ginseng Radix et Rhizoma | Panaxxytriol                                                                        |
| Ginseng Radix et Rhizoma | Pancreatistatin                                                                     |
| Ginseng Radix et Rhizoma | Pandamine                                                                           |
| Ginseng Radix et Rhizoma | 2-Formylpyrrole                                                                     |
| Ginseng Radix et Rhizoma | Ramalic acid                                                                        |
| Ginseng Radix et Rhizoma | Methylselenocysteine                                                                |
| Ginseng Radix et Rhizoma | suchilactone                                                                        |
| Ginseng Radix et Rhizoma | Suffruticoside A_qt1                                                                |
| Ginseng Radix et Rhizoma | Vulgarin                                                                            |
| Ginseng Radix et Rhizoma | Trifolirhizin                                                                       |
| Ginseng Radix et Rhizoma | Undecane, 3,6-dimethyl                                                              |
| Ginseng Radix et Rhizoma | PANGAMIC ACID                                                                       |
| Ginseng Radix et Rhizoma | 3-[[[(2S)-2,4-dihydroxy-3,3-dimethylbutanoyl]amino]propanoic acid                   |
| Ginseng Radix et Rhizoma | (Z,Z)-alpha-farnesene                                                               |
| Ginseng Radix et Rhizoma | alpha-Guttiiferin                                                                   |
| Ginseng Radix et Rhizoma | beta-elemene                                                                        |
| Ginseng Radix et Rhizoma | (Z)-2-methyl-5-[(1S,2R,4R)-2-methyl-3-methylene-2-norbornanyl]pent-2-en-1-ol        |
| Ginseng Radix et Rhizoma | beta-Selinene                                                                       |
| Ginseng Radix et Rhizoma | cis-Widdrol alpha-epoxide                                                           |
| Ginseng Radix et Rhizoma | Dammarane                                                                           |
| Ginseng Radix et Rhizoma | alexandrin                                                                          |
| Ginseng Radix et Rhizoma | alexandrin_qt                                                                       |
| Ginseng Radix et Rhizoma | ginsenoside Rg5                                                                     |
| Ginseng Radix et Rhizoma | ginsenoside Rg5_qt                                                                  |
| Ginseng Radix et Rhizoma | Methyl margarate                                                                    |
| Ginseng Radix et Rhizoma | oleanane                                                                            |
| Ginseng Radix et Rhizoma | p-Glucosyloxymandelonitrile                                                         |
| Ginseng Radix et Rhizoma | darutoside                                                                          |
| Ginseng Radix et Rhizoma | alloaromadrene                                                                      |
| Ginseng Radix et Rhizoma | DBP                                                                                 |
| Ginseng Radix et Rhizoma | palmitic acid                                                                       |
| Ginseng Radix et Rhizoma | Linoleic                                                                            |
| Ginseng Radix et Rhizoma | Fumarine                                                                            |
| Ginseng Radix et Rhizoma | MYS                                                                                 |
| Ginseng Radix et Rhizoma | paeonol                                                                             |
| Ginseng Radix et Rhizoma | methyl palmitate                                                                    |
| Ginseng Radix et Rhizoma | tetradecane                                                                         |
| Ginseng Radix et Rhizoma | Hepanal                                                                             |
| Ginseng Radix et Rhizoma | (1R,4S,4aR,8aR)-4-isopropyl-1,6-dimethyl-3,4,4a,7,8,8a-hexahydro-2H-naphthalen-1-ol |
| Ginseng Radix et Rhizoma | beta-Bisabolene                                                                     |
| Polygonati Rhizoma       | isoliquiritigenin                                                                   |
| Polygonati Rhizoma       | DFV                                                                                 |
| Polygonati Rhizoma       | salicylic acid                                                                      |
| Polygonati Rhizoma       | baicalein                                                                           |

|                             |                                                                                                                        |
|-----------------------------|------------------------------------------------------------------------------------------------------------------------|
| Polygonati Rhizoma          | 3'-Methoxydaidzein                                                                                                     |
| Polygonati Rhizoma          | succinic acid                                                                                                          |
| Polygonati Rhizoma          | Sitogluside                                                                                                            |
| Polygonati Rhizoma          | beta-sitosterol                                                                                                        |
| Polygonati Rhizoma          | sitosterol                                                                                                             |
| Polygonati Rhizoma          | methylprotodioscin                                                                                                     |
| Polygonati Rhizoma          | methylprotodioscin_qt                                                                                                  |
| Polygonati Rhizoma          | (+)-Syringaresinol                                                                                                     |
| Polygonati Rhizoma          | (Z)-1-(2,4-dihydroxyphenyl)-3-(4-hydroxyphenyl)prop-2-en-1-one                                                         |
| Polygonati Rhizoma          | glucuronic acid                                                                                                        |
| Polygonati Rhizoma          | neoliquiritin                                                                                                          |
| Polygonati Rhizoma          | (2R)-7-hydroxy-2-(4-hydroxyphenyl)chroman-4-one                                                                        |
| Polygonati Rhizoma          | GUP                                                                                                                    |
| Polygonati Rhizoma          | BGC                                                                                                                    |
| Polygonati Rhizoma          | diosgenin                                                                                                              |
| Polygonati Rhizoma          | 4',5-Dihydroxyflavone                                                                                                  |
| Polygonati Rhizoma          | 4-[(1R,3aS,4R,6aS)-4-(4-hydroxy-3,5-dimethoxyphenyl)-1,3,3a,4,6,6a-hexahydrofuro[4,3-c]furan-1-yl]-2,6-dimethoxyphenol |
| Polygonati Rhizoma          | HMF                                                                                                                    |
| Polygonati Rhizoma          | apigenin                                                                                                               |
| Polygonati Rhizoma          | 2',7-dihydroxy-3',4'-dimethoxyisoflavane                                                                               |
| Polygonati Rhizoma          | 4-methylolfurfural                                                                                                     |
| Polygonati Rhizoma          | Oroxin A                                                                                                               |
| Polygonati Rhizoma          | 2-Acridinecarboxylic acid                                                                                              |
| Polygonati Rhizoma          | liriodendrin                                                                                                           |
| Polygonati Rhizoma          | n-butyl-β-D-fructopyranoside                                                                                           |
| Polygonati Rhizoma          | 2-Propen-1-one, 1-(2,4-dihydroxyphenyl)-3-(4-(beta-D-glucopyranosyloxy)phenyl)-, (2E)-sibiricoside A                   |
| Polygonati Rhizoma          | sibiricoside A_qt                                                                                                      |
| Polygonati Rhizoma          | sibiricoside B                                                                                                         |
| Polygonati Rhizoma          | sibiricoside B_qt                                                                                                      |
| Polygonati Rhizoma          | (+)-Syringaresinol-O-beta-D-glucoside                                                                                  |
| Polygonati Rhizoma          | vitexin xyloside                                                                                                       |
| Polygonati Rhizoma          | (Z)-nonadec-6-enoic acid                                                                                               |
| Polygonati Rhizoma          | zhonghualiaoine 1                                                                                                      |
| Rehmanniae Radix Praeparata | Arachic acid                                                                                                           |
| Rehmanniae Radix Praeparata | EIC                                                                                                                    |
| Rehmanniae Radix Praeparata | PENTADECYLIC ACID                                                                                                      |
| Rehmanniae Radix Praeparata | leonuride                                                                                                              |
| Rehmanniae Radix Praeparata | Daturic acid                                                                                                           |
| Rehmanniae Radix Praeparata | acteoside                                                                                                              |
| Rehmanniae Radix Praeparata | methyl (2E,4E)-hexadeca-2,4-dienoate                                                                                   |
| Rehmanniae Radix Praeparata | zoomaric acid                                                                                                          |
| Rehmanniae Radix Praeparata | Sumiki's acid                                                                                                          |
| Rehmanniae Radix Praeparata | Dihydro-beta-ionone                                                                                                    |
| Rehmanniae Radix Praeparata | Pca                                                                                                                    |
| Rehmanniae Radix Praeparata | catalpol                                                                                                               |
| Rehmanniae Radix Praeparata | catapol_qt                                                                                                             |
| Rehmanniae Radix Praeparata | MTL                                                                                                                    |
| Rehmanniae Radix Praeparata | lauric acid                                                                                                            |
| Rehmanniae Radix Praeparata | 8-epi-Loganic acid                                                                                                     |
| Rehmanniae Radix Praeparata | Forsythiaside                                                                                                          |
| Rehmanniae Radix Praeparata | succinic acid                                                                                                          |
| Rehmanniae Radix Praeparata | Sitogluside                                                                                                            |

|                             |                                                                                                                                                                                                                                           |
|-----------------------------|-------------------------------------------------------------------------------------------------------------------------------------------------------------------------------------------------------------------------------------------|
| Rehmanniae Radix Praeparata | sitosterol                                                                                                                                                                                                                                |
| Rehmanniae Radix Praeparata | FER                                                                                                                                                                                                                                       |
| Rehmanniae Radix Praeparata | 2-(4-hydroxyphenyl)ethyl hexacosanoate                                                                                                                                                                                                    |
| Rehmanniae Radix Praeparata | aeginetic acid                                                                                                                                                                                                                            |
| Rehmanniae Radix Praeparata | Ajugol                                                                                                                                                                                                                                    |
| Rehmanniae Radix Praeparata | Ajugoside                                                                                                                                                                                                                                 |
| Rehmanniae Radix Praeparata | Ajugoside_qt                                                                                                                                                                                                                              |
| Rehmanniae Radix Praeparata | Cerebrosid                                                                                                                                                                                                                                |
| Rehmanniae Radix Praeparata | Cistanoside A                                                                                                                                                                                                                             |
| Rehmanniae Radix Praeparata | Cistanoside F                                                                                                                                                                                                                             |
| Rehmanniae Radix Praeparata | methyl 9,10-methylene-hexadecanoate                                                                                                                                                                                                       |
|                             | (2S,3R,4R,5S,6R)-2-[[[(1S,4aS,5R,7aR)-4a,5-dihydroxy-7-methylol-5,7a-dihydro-1H-cyclopenta[c]pyran-1-yl]oxy]-6-methylol-tetrahydropyran-3,4,5-triol                                                                                       |
| Rehmanniae Radix Praeparata | melittoside_qt                                                                                                                                                                                                                            |
| Rehmanniae Radix Praeparata | Dihydrocatalpol                                                                                                                                                                                                                           |
| Rehmanniae Radix Praeparata | geniposide                                                                                                                                                                                                                                |
| Rehmanniae Radix Praeparata | geniposide_qt                                                                                                                                                                                                                             |
| Rehmanniae Radix Praeparata | glutinoside                                                                                                                                                                                                                               |
| Rehmanniae Radix Praeparata | Jiofuran                                                                                                                                                                                                                                  |
| Rehmanniae Radix Praeparata | jioglutin A                                                                                                                                                                                                                               |
| Rehmanniae Radix Praeparata | jioglutin B                                                                                                                                                                                                                               |
| Rehmanniae Radix Praeparata | jioglutin C                                                                                                                                                                                                                               |
| Rehmanniae Radix Praeparata | jioglutin D                                                                                                                                                                                                                               |
| Rehmanniae Radix Praeparata | jioglutin E                                                                                                                                                                                                                               |
| Rehmanniae Radix Praeparata | jioglutolide                                                                                                                                                                                                                              |
| Rehmanniae Radix Praeparata | Jioglutoside A                                                                                                                                                                                                                            |
|                             | methyl (1S,4aS,5R,7aR)-1-methylol-1-[[[(2S,3R,4S,5S,6R)-3,4,5-trihydroxy-6-[[[(2R,3R,4R,5S,6R)-3,4,5-trihydroxy-6-methyl-tetrahydropyran-2-yl]oxymethyl]tetrahydropyran-2-yl]oxy-4a,5,6,7a-tetrahydro-1H-cyclopenta[d]pyran-4-carboxylate |
| Rehmanniae Radix Praeparata | Jioglutoside B_qt                                                                                                                                                                                                                         |
| Rehmanniae Radix Praeparata | Jionoside A                                                                                                                                                                                                                               |
| Rehmanniae Radix Praeparata | Jionoside B                                                                                                                                                                                                                               |
| Rehmanniae Radix Praeparata | Melittoside                                                                                                                                                                                                                               |
| Rehmanniae Radix Praeparata | METHYL PALMITOLEATE                                                                                                                                                                                                                       |
| Rehmanniae Radix Praeparata | 6-O-p-coumaroylajugol                                                                                                                                                                                                                     |
| Rehmanniae Radix Praeparata | methyl-2,6,10-trimethyltridecanoate                                                                                                                                                                                                       |
| Rehmanniae Radix Praeparata | Purpleaside C                                                                                                                                                                                                                             |
| Rehmanniae Radix Praeparata | Rehmaglutin B                                                                                                                                                                                                                             |
|                             | (3aS,4R,6aS)-4-hydroxy-6,6a-dimethylol-3a,4-dihydro-3H-cyclopenta[d]furan-2-one                                                                                                                                                           |
| Rehmanniae Radix Praeparata | (2S,3R,4S,5S,6R)-2-[(1R,2R)-2-hydroxy-2-[(E,3S)-3-hydroxybut-1-enyl]-1,3,3-trimethylcyclohexoxy]-6-(hydroxymethyl)tetrahydropyran-3,4,5-triol                                                                                             |
| Rehmanniae Radix Praeparata | (2S,3R,4S,5S,6R)-2-[(1R,2R)-2-hydroxy-2-[(E,3R)-3-hydroxybut-1-enyl]-1,3,3-trimethylcyclohexoxy]-6-(hydroxymethyl)tetrahydropyran-3,4,5-triol                                                                                             |
| Rehmanniae Radix Praeparata | Rehmaionoside C                                                                                                                                                                                                                           |
| Rehmanniae Radix Praeparata | rehmannioside B                                                                                                                                                                                                                           |
| Rehmanniae Radix Praeparata | rehmannioside C                                                                                                                                                                                                                           |
| Rehmanniae Radix Praeparata | 6-O-p-hydroxybenzoylajugol                                                                                                                                                                                                                |
|                             | (3R)-2,6,6-trimethyl-5-[(2R,3R,4S,5S,6R)-3,4,5-trihydroxy-6-(hydroxymethyl)oxan-2-yl]oxycyclohexene-1-carboxylic acid                                                                                                                     |
| Rehmanniae Radix Praeparata |                                                                                                                                                                                                                                           |

|                             |                                                                                              |
|-----------------------------|----------------------------------------------------------------------------------------------|
| Rehmanniae Radix Praeparata | Rehmannioside A                                                                              |
| Rehmanniae Radix Praeparata | Rehmaglutin A                                                                                |
| Rehmanniae Radix Praeparata | Rehmaglutin D                                                                                |
| Rehmanniae Radix Praeparata | 6-O-vanilloylajugol                                                                          |
| Rehmanniae Radix Praeparata | echinacoside                                                                                 |
| Rehmanniae Radix Praeparata | aucubin                                                                                      |
| Rehmanniae Radix Praeparata | Acetylcatalpol                                                                               |
| Rehmanniae Radix Praeparata | Docosanoate                                                                                  |
| Rehmanniae Radix Praeparata | Caffeate                                                                                     |
| Rehmanniae Radix Praeparata | Stigmasterol                                                                                 |
| Rehmanniae Radix Praeparata | Stachyose                                                                                    |
| Rehmanniae Radix Praeparata | HMF                                                                                          |
| Rehmanniae Radix Praeparata | raffinose                                                                                    |
| Rehmanniae Radix Praeparata | sucrose                                                                                      |
| Epimedii Folium             | (L)-alpha-Terpineol                                                                          |
| Epimedii Folium             | dec-2-enal                                                                                   |
| Epimedii Folium             | CAM                                                                                          |
| Epimedii Folium             | 24-epicampesterol                                                                            |
| Epimedii Folium             | germacrene                                                                                   |
| Epimedii Folium             | copaene                                                                                      |
| Epimedii Folium             | NON                                                                                          |
| Epimedii Folium             | Linoleyl acetate                                                                             |
| Epimedii Folium             | 24190-29-2                                                                                   |
| Epimedii Folium             | poriferast-5-en-3beta-ol                                                                     |
| Epimedii Folium             | isoliquiritigenin                                                                            |
| Epimedii Folium             | DFV                                                                                          |
| Epimedii Folium             | Pulegone                                                                                     |
| Epimedii Folium             | (R)-linalool                                                                                 |
| Epimedii Folium             | Izosafrol                                                                                    |
| Epimedii Folium             | (1S,4R)-fenchone                                                                             |
| Epimedii Folium             | (6R)-6-isopropyl-3-methyl-1-cyclohex-2-enone                                                 |
| Epimedii Folium             | Methyleugenol                                                                                |
| Epimedii Folium             | tricin                                                                                       |
| Epimedii Folium             | alpha-Cubebene                                                                               |
| Epimedii Folium             | 20-Hexadecanoylingenol                                                                       |
| Epimedii Folium             | Terragon                                                                                     |
| Epimedii Folium             | (-)-Borneol                                                                                  |
| Epimedii Folium             | Ginkgetin                                                                                    |
| Epimedii Folium             | Isoginkgetin                                                                                 |
| Epimedii Folium             | oleanolic acid                                                                               |
| Epimedii Folium             | 3,4,5-Trimethoxytoluene                                                                      |
| Epimedii Folium             | junipene                                                                                     |
| Epimedii Folium             | magnoflorine                                                                                 |
| Epimedii Folium             | salidroside                                                                                  |
| Epimedii Folium             | Tyrosol                                                                                      |
| Epimedii Folium             | Ginnol                                                                                       |
| Epimedii Folium             | Chryseriol                                                                                   |
| Epimedii Folium             | lauric acid                                                                                  |
| Epimedii Folium             | Flavone der.                                                                                 |
| Epimedii Folium             | (2R,3R)-2-(3,4-dimethoxyphenyl)-7-methoxy-3-methyl-5-[(E)-prop-1-enyl]-2,3-dihydrobenzofuran |
| Epimedii Folium             | Vetol                                                                                        |
| Epimedii Folium             | Damascenone                                                                                  |
| Epimedii Folium             | 8-Isopentenyl-kaempferol                                                                     |
| Epimedii Folium             | Azaron                                                                                       |
| Epimedii Folium             | Sitogluside                                                                                  |
| Epimedii Folium             | sitosterol                                                                                   |
| Epimedii Folium             | Docosanoate                                                                                  |

|                 |                                                                                                                                                                                                                                      |
|-----------------|--------------------------------------------------------------------------------------------------------------------------------------------------------------------------------------------------------------------------------------|
| Epimedii Folium | kaempferol                                                                                                                                                                                                                           |
| Epimedii Folium | (Z)-heptadec-3-ene                                                                                                                                                                                                                   |
| Epimedii Folium | 3,5-Dimethoxytoluene                                                                                                                                                                                                                 |
| Epimedii Folium | Isomenthol                                                                                                                                                                                                                           |
| Epimedii Folium | Octyl formate                                                                                                                                                                                                                        |
| Epimedii Folium | olivil                                                                                                                                                                                                                               |
| Epimedii Folium | Hyperin                                                                                                                                                                                                                              |
| Epimedii Folium | quercetin-3-rhamnooside                                                                                                                                                                                                              |
| Epimedii Folium | Hirsutrin                                                                                                                                                                                                                            |
| Epimedii Folium | Robinetin                                                                                                                                                                                                                            |
| Epimedii Folium | rouhuoside                                                                                                                                                                                                                           |
| Epimedii Folium | Sagittatoside A                                                                                                                                                                                                                      |
| Epimedii Folium | Anhydroicaritin                                                                                                                                                                                                                      |
| Epimedii Folium | sagittatoside B                                                                                                                                                                                                                      |
| Epimedii Folium | Trifolin                                                                                                                                                                                                                             |
| Epimedii Folium | wanepimidoside A                                                                                                                                                                                                                     |
| Epimedii Folium | wanepimidoside_qt                                                                                                                                                                                                                    |
| Epimedii Folium | Wushanicariin                                                                                                                                                                                                                        |
| Epimedii Folium | wushanicariin_qt                                                                                                                                                                                                                     |
|                 | C-Homoerythrinan, 1,6-didehydro-3,15,16-trimethoxy-,<br>(3.beta.)-                                                                                                                                                                   |
| Epimedii Folium | Besigomsin                                                                                                                                                                                                                           |
| Epimedii Folium | Yinyanghuo A                                                                                                                                                                                                                         |
| Epimedii Folium | Yinyanghuo B                                                                                                                                                                                                                         |
| Epimedii Folium | Yinyanghuo C                                                                                                                                                                                                                         |
| Epimedii Folium | Yinyanghuo D                                                                                                                                                                                                                         |
| Epimedii Folium | Yinyanghuo E                                                                                                                                                                                                                         |
| Epimedii Folium | Yixinoside A                                                                                                                                                                                                                         |
|                 | 6-hydroxy-11,12-dimethoxy-2,2-dimethyl-1,8-dioxo-<br>2,3,4,8-tetrahydro-1H-isochromeno[3,4-h]isoquinolin-<br>2-ium                                                                                                                   |
| Epimedii Folium | 3-Hexenyl-beta-glucopyranoside                                                                                                                                                                                                       |
| Epimedii Folium | 5,7,4'-trihydroxy-8,3'-diprenylflavone                                                                                                                                                                                               |
| Epimedii Folium | 8-(3-methylbut-2-enyl)-2-phenyl-chromone                                                                                                                                                                                             |
| Epimedii Folium | acuminatoside                                                                                                                                                                                                                        |
| Epimedii Folium | anhydroicaritin                                                                                                                                                                                                                      |
| Epimedii Folium | Anhydroicaritin-3-O-alpha-L-rhamnoside                                                                                                                                                                                               |
| Epimedii Folium | artonin U                                                                                                                                                                                                                            |
| Epimedii Folium | 1,2-bis(4-hydroxy-3-methoxyphenyl)propan-1,3-diol                                                                                                                                                                                    |
| Epimedii Folium | baohuoside VI                                                                                                                                                                                                                        |
|                 | 3,5,7-Trihydroxy-4'-methoxyl-8-prenylflavone-3-O-<br>rhamnopyranoside                                                                                                                                                                |
| Epimedii Folium | Baohuoside VI                                                                                                                                                                                                                        |
| Epimedii Folium | Bilobanol                                                                                                                                                                                                                            |
| Epimedii Folium | bilobetin                                                                                                                                                                                                                            |
| Epimedii Folium | brevicornin                                                                                                                                                                                                                          |
| Epimedii Folium | caohuoside B                                                                                                                                                                                                                         |
| Epimedii Folium | caohuoside D                                                                                                                                                                                                                         |
|                 | 7-[(2S,3R,4S,5S,6R)-3,4,5-trihydroxy-6-methyl-<br>tetrahydropyran-2-yl]oxy-tetrahydropyran-2-yl]oxy-5-<br>hydroxy-2-(4-methoxyphenyl)-8-(3-methylbut-2-enyl)-<br>7-[(2S,3R,4S,5S,6R)-3,4,5-trihydroxy-6-methylol-<br>tetrahydropyran |
| Epimedii Folium | 2,15-Hexadecanedione                                                                                                                                                                                                                 |
| Epimedii Folium | Epimedin B                                                                                                                                                                                                                           |
| Epimedii Folium | Epimedin C_qt                                                                                                                                                                                                                        |
| Epimedii Folium | Epimedin C                                                                                                                                                                                                                           |



|                     |                                                                                                                                                                  |
|---------------------|------------------------------------------------------------------------------------------------------------------------------------------------------------------|
| Epimedii Folium     | epimedokoreanone A<br>(2S,5S)-3,5-dimethoxy-2-(4-nyaroxypnenyl)-8-(3-methylbut-2-enyl)-7-[(2S,3R,4S,5S,6R)-3,4,5-trihydroxy-6-methylol-tetrahydropyran-2-yl]oxy- |
| Epimedii Folium     | chroman-4-one                                                                                                                                                    |
| Epimedii Folium     | epimedeside C                                                                                                                                                    |
| Epimedii Folium     | epimedeside D                                                                                                                                                    |
| Epimedii Folium     | Epimedeside E                                                                                                                                                    |
| Epimedii Folium     | epimedeside                                                                                                                                                      |
| Epimedii Folium     | DOB                                                                                                                                                              |
| Epimedii Folium     | globulol                                                                                                                                                         |
| Epimedii Folium     | Hentriacontanol-6                                                                                                                                                |
| Epimedii Folium     | hexandraside D                                                                                                                                                   |
| Epimedii Folium     | Hexandraside E                                                                                                                                                   |
| Epimedii Folium     | hexandraside F                                                                                                                                                   |
| Epimedii Folium     | Icaride A2                                                                                                                                                       |
| Epimedii Folium     | Icarin                                                                                                                                                           |
| Epimedii Folium     | Icariresinol                                                                                                                                                     |
| Epimedii Folium     | Icariside A7                                                                                                                                                     |
| Epimedii Folium     | 3,4,6-trimethoxyphenanthrene-2,7-diol                                                                                                                            |
| Epimedii Folium     | icariside C1                                                                                                                                                     |
| Epimedii Folium     | icariside I                                                                                                                                                      |
| Epimedii Folium     | icariside II                                                                                                                                                     |
| Epimedii Folium     | 4H-1-Benzopyran-4-one, 3-((6-deoxy-alpha-L-mennopyranosyl)oxy)-5,7-dihydroxy-2-(4-hydroxyphenyl)-8-(3-methyl-2-butenyl)-                                         |
| Epimedii Folium     | 3-[(2S,3R,4S,5S,6R)-4,5-dimethoxy-6-methylol-2-yl]oxy-6-methyl-4,5,7-trihydroxy-2-(4-hydroxyphenyl)-8-(3-methylbut-2-enyl)chromone                               |
| Epimedii Folium     | enyl)chromone                                                                                                                                                    |
| Epimedii Folium     | Ikariside C                                                                                                                                                      |
| Epimedii Folium     | Ikariside F                                                                                                                                                      |
| Epimedii Folium     | Ikshusterol                                                                                                                                                      |
| Epimedii Folium     | Lepedin                                                                                                                                                          |
| Epimedii Folium     | korepimedeside A                                                                                                                                                 |
| Epimedii Folium     | korepimedeside B                                                                                                                                                 |
| Epimedii Folium     | emodin                                                                                                                                                           |
| Epimedii Folium     | Eucarvone                                                                                                                                                        |
| Epimedii Folium     | Astragalin                                                                                                                                                       |
| Epimedii Folium     | luteolin                                                                                                                                                         |
| Epimedii Folium     | Magnograndiolide                                                                                                                                                 |
| Epimedii Folium     | 1-hexanol                                                                                                                                                        |
| Epimedii Folium     | patchouli alcohol                                                                                                                                                |
| Epimedii Folium     | (+)-Cycloolivil                                                                                                                                                  |
| Epimedii Folium     | apigenin                                                                                                                                                         |
| Epimedii Folium     | quercetin                                                                                                                                                        |
| Polygoni Multiflori | 3,4,3',5'-Tetrahydroxystilbene-3-Glucoside                                                                                                                       |
| Polygoni Multiflori | Polygoacetophenoside                                                                                                                                             |
| Polygoni Multiflori | Tetrahydroxytaxadiene                                                                                                                                            |
| Polygoni Multiflori | Questinol                                                                                                                                                        |
| Polygoni Multiflori | Guaijaverin                                                                                                                                                      |
| Polygoni Multiflori | Questin                                                                                                                                                          |
| Polygoni Multiflori | Gamma-Sitosterol                                                                                                                                                 |
| Polygoni Multiflori | Fetidine                                                                                                                                                         |
| Polygoni Multiflori | Physcion                                                                                                                                                         |
| Polygoni Multiflori | chrysophanol-8-O-Beta-D-(6'-O-Galloyl)-Glucopyranoside                                                                                                           |
| Polygoni Multiflori | Rhein                                                                                                                                                            |
| Polygoni Multiflori | Emodin                                                                                                                                                           |

Polygoni Multiflori  
Polygoni Multiflori

Piceid  
Chrysophanol  
Polygodial  
Tricin  
N-Trans-Feruloyltyramine  
Citrosein  
Rhein Diglucoside  
Chrysazin  
Resveratrol  
Polygalacic Acid  
Emodin Anthrone  
Chrysarobin  
Daucosterol

Supplementary Table 2

| Targets of Active Compounds |                   |                                                                                |          |
|-----------------------------|-------------------|--------------------------------------------------------------------------------|----------|
| MolId                       | MolName           | Target                                                                         | Symbol   |
| MOL001525                   | Daucosterol       | Progesterone receptor                                                          | PGR      |
| MOL001525                   | Daucosterol       | Nuclear receptor coactivator 2                                                 | NCOA2    |
| MOL002268                   | Rhein             | Prostaglandin G/H synthase 1                                                   | PTGS1    |
| MOL002268                   | Rhein             | Prostaglandin G/H synthase 2                                                   | PTGS2    |
| MOL002268                   | Rhein             | Heat shock protein HSP 90-alpha                                                | HSP90AA1 |
| MOL002268                   | Rhein             | Phosphatidylinositol 4,5-bisphosphate 3-kinase catalytic subunit gamma isoform | PIK3CG   |
| MOL002268                   | Rhein             | Nuclear receptor coactivator 6<br>Aldo-keto reductase family 1<br>member B10   | NCOA6    |
| MOL002268                   | Rhein             | Transcription factor AP-1                                                      | AKR1B10  |
| MOL002268                   | Rhein             | Thymidylate synthase                                                           | JUN      |
| MOL002268                   | Rhein             | Interleukin-13                                                                 | TYMS     |
| MOL002268                   | Rhein             | Interleukin-13                                                                 | IL13     |
| MOL002268                   | Rhein             | Peroxisome proliferator-activated<br>receptor gamma                            | PPARG    |
| MOL002268                   | Rhein             | Thrombopoietin receptor                                                        | MPL      |
| MOL002268                   | Rhein             | Interleukin-1 beta                                                             | IL1B     |
| MOL002268                   | Rhein             | Prostaglandin G/H synthase 1                                                   | PTGS1    |
| MOL002268                   | Rhein             | Apolipoprotein A-II                                                            | APOA2    |
| MOL002268                   | Rhein             | Gamma-glutamyl hydrolase                                                       | GGH      |
| MOL002268                   | Rhein             | Prostaglandin G/H synthase 2                                                   | PTGS2    |
| MOL002268                   | Rhein             | Serine hydroxymethyltransferase                                                | SHMT2    |
| MOL002268                   | Rhein             | Serpin B7                                                                      | SERPINB7 |
| MOL002268                   | Rhein             | Arachidonate 5-lipoxygenase                                                    | ALOX5    |
| MOL002268                   | Rhein             | Plasminogen activator inhibitor 1                                              | SERPINE1 |
| MOL008647                   | rans-Feruloyltyra | Melatonin receptor type 1A                                                     | MTNR1A   |
| MOL008647                   | rans-Feruloyltyra | Melatonin receptor type 1B                                                     | MTNR1B   |
| MOL008647                   | rans-Feruloyltyra | 5-hydroxytryptamine receptor 2C                                                | HTR2C    |
| MOL001792                   | DFV               | Prostaglandin G/H synthase 1                                                   | PTGS1    |
| MOL001792                   | DFV               | Estrogen receptor                                                              | ESR1     |
| MOL001792                   | DFV               | Prostaglandin G/H synthase 2                                                   | PTGS2    |
| MOL001792                   | DFV               | Retinoic acid receptor RXR-alpha                                               | RXRA     |
| MOL001792                   | DFV               | Beta-2 adrenergic receptor                                                     | ADRB2    |
| MOL001792                   | DFV               | Heat shock protein HSP 90-alpha                                                | HSP90AA1 |
| MOL001792                   | DFV               | cAMP-dependent protein kinase<br>catalytic subunit alpha                       | PRKACA   |
| MOL001792                   | DFV               | Amine oxidase [flavin-containing]<br>Sodium-dependent serotonin                | MAOB     |
| MOL001792                   | DFV               | transporter                                                                    | SLC6A4   |
| MOL001792                   | DFV               | cAMP-dependent protein kinase<br>inhibitor alpha                               | PKIA     |
| MOL002714                   | baicalein         | Prostaglandin G/H synthase 1                                                   | PTGS1    |
| MOL002714                   | baicalein         | Androgen receptor                                                              | AR       |
| MOL002714                   | baicalein         | Prostaglandin G/H synthase 2                                                   | PTGS2    |

|           |                  |                                                                  |          |
|-----------|------------------|------------------------------------------------------------------|----------|
| MOL002714 | baicalein        | Heat shock protein HSP 90-alpha<br>cAMP-dependent protein kinase | HSP90AA1 |
| MOL002714 | baicalein        | catalytic subunit alpha                                          | PRKACA   |
| MOL002714 | baicalein        | Dipeptidyl peptidase 4<br>cGMP-inhibited 3',5'-cyclic            | DPP4     |
| MOL002714 | baicalein        | phosphodiesterase A                                              | PDE3A    |
| MOL002714 | baicalein        | Trypsin-1                                                        | PRSS1    |
| MOL002714 | baicalein        | Nuclear receptor coactivator 2                                   | NCOA2    |
| MOL002714 | baicalein        | Nuclear receptor coactivator 1                                   | NCOA1    |
| MOL002714 | baicalein        | Transcription factor p65<br>RAC-alpha serine/threonine-protein   | RELA     |
| MOL002714 | baicalein        | kinase                                                           | AKT1     |
| MOL002714 | baicalein        | Apoptosis regulator Bcl-2                                        | BCL2     |
| MOL002714 | baicalein        | Proto-oncogene c-Fos                                             | FOS      |
| MOL002714 | baicalein        | Apoptosis regulator BAX                                          | BAX      |
| MOL002714 | baicalein        | Matrix metalloproteinase-9                                       | MMP9     |
| MOL002714 | baicalein        | Caspase-3                                                        | CASP3    |
| MOL002714 | baicalein        | Cellular tumor antigen p53                                       | TP63     |
| MOL002714 | baicalein        | Hypoxia-inducible factor 1-alpha                                 | HIF1A    |
| MOL002714 | baicalein        | Fos-related antigen 1                                            | FOSL1    |
| MOL002714 | baicalein        | Fos-related antigen 2                                            | FOSL2    |
| MOL002714 | baicalein        | G2/mitotic-specific cyclin-B1                                    | CCNB1    |
| MOL002714 | baicalein        | Myeloperoxidase                                                  | MPO      |
| MOL002714 | baicalein        | Aryl hydrocarbon receptor                                        | AHR      |
| MOL002714 | baicalein        | Insulin-like growth factor II                                    | IGF2     |
| MOL002714 | baicalein        | Cytochrome c                                                     | CYCS     |
| MOL002714 | baicalein        | Arachidonate 12-lipoxygenase, 12S-<br>type                       | ALOX12   |
| MOL002714 | baicalein        | Nuclear factor of activated T-cells,<br>cytoplasmic 1            | NFATC1   |
| MOL002714 | baicalein        | Tudor domain-containing protein 7                                | TDRD7    |
| MOL002714 | baicalein        | Egl nine homolog 1                                               | EGLN1    |
| MOL002714 | baicalein        | NADPH oxidase 5                                                  | NOX5     |
| MOL002714 | baicalein        | Apolipoprotein D                                                 | APOD     |
| MOL002959 | '-Methoxydaidzei | Nitric oxide synthase, inducible                                 | NOS2     |
| MOL002959 | '-Methoxydaidzei | Prostaglandin G/H synthase 1                                     | PTGS1    |
| MOL002959 | '-Methoxydaidzei | Estrogen receptor                                                | ESR1     |
| MOL002959 | '-Methoxydaidzei | Androgen receptor                                                | AR       |
| MOL002959 | '-Methoxydaidzei | Peroxisome proliferator-activated<br>receptor gamma              | PPARG    |
| MOL002959 | '-Methoxydaidzei | Prostaglandin G/H synthase 2                                     | PTGS2    |
| MOL002959 | '-Methoxydaidzei | Retinoic acid receptor RXR-alpha                                 | RXRA     |
| MOL002959 | '-Methoxydaidzei | Estrogen receptor beta                                           | ESR2     |
| MOL002959 | '-Methoxydaidzei | Mitogen-activated protein kinase 14                              | MAPK14   |
| MOL002959 | '-Methoxydaidzei | Glycogen synthase kinase-3 beta                                  | GSK3B    |
| MOL002959 | '-Methoxydaidzei | Heat shock protein HSP 90-alpha                                  | HSP90AA1 |
| MOL002959 | '-Methoxydaidzei | Serine/threonine-protein kinase<br>cAMP-dependent protein kinase | CHEK1    |
| MOL002959 | '-Methoxydaidzei | catalytic subunit alpha                                          | PRKACA   |
| MOL002959 | '-Methoxydaidzei | Trypsin-1                                                        | PRSS1    |
| MOL002959 | '-Methoxydaidzei | Cyclin-A2                                                        | CCNA2    |
| MOL002959 | '-Methoxydaidzei | Nuclear receptor coactivator 1                                   | NCOA1    |
| MOL000358 | beta-sitosterol  | Progesterone receptor                                            | PGR      |
| MOL000358 | beta-sitosterol  | Nuclear receptor coactivator 2                                   | NCOA2    |
| MOL000358 | beta-sitosterol  | Prostaglandin G/H synthase 1                                     | PTGS1    |
| MOL000358 | beta-sitosterol  | Prostaglandin G/H synthase 2                                     | PTGS2    |
| MOL000358 | beta-sitosterol  | Heat shock protein HSP 90-alpha                                  | HSP90AA1 |
| MOL000358 | beta-sitosterol  | Potassium voltage-gated channel<br>subfamily H member 2          | KCNH2    |

|           |                    |                                     |          |
|-----------|--------------------|-------------------------------------|----------|
|           |                    | cAMP-dependent protein kinase       |          |
| MOL000358 | beta-sitosterol    | catalytic subunit alpha             | PRKACA   |
| MOL000358 | beta-sitosterol    | D(1A) dopamine receptor             | DRD1     |
| MOL000358 | beta-sitosterol    | Muscarinic acetylcholine receptor   | CHRM3    |
| MOL000358 | beta-sitosterol    | Muscarinic acetylcholine receptor   | CHRM1    |
|           |                    | Sodium channel protein type 5       |          |
| MOL000358 | beta-sitosterol    | subunit alpha                       | SCN5A    |
| MOL000358 | beta-sitosterol    | Muscarinic acetylcholine receptor   | CHRM4    |
|           |                    | cGMP-inhibited 3',5'-cyclic         |          |
| MOL000358 | beta-sitosterol    | phosphodiesterase A                 | PDE3A    |
| MOL000358 | beta-sitosterol    | Alpha-1A adrenergic receptor        | ADRA1A   |
| MOL000358 | beta-sitosterol    | Muscarinic acetylcholine receptor   | CHRM2    |
| MOL000358 | beta-sitosterol    | Alpha-1B adrenergic receptor        | ADRA1B   |
| MOL000358 | beta-sitosterol    | Beta-2 adrenergic receptor          | ADRB2    |
|           |                    | Neuronal acetylcholine receptor     |          |
| MOL000358 | beta-sitosterol    | subunit alpha-2                     | CHRNA2   |
|           |                    | Sodium-dependent serotonin          |          |
| MOL000358 | beta-sitosterol    | transporter                         | SLC6A4   |
| MOL000358 | beta-sitosterol    | Mu-type opioid receptor             | OPRM1    |
|           |                    | Neuronal acetylcholine receptor     |          |
| MOL000358 | beta-sitosterol    | subunit alpha-7                     | CHRNA7   |
| MOL000358 | beta-sitosterol    | Apoptosis regulator Bcl-2           | BCL2     |
| MOL000358 | beta-sitosterol    | Apoptosis regulator BAX             | BAX      |
| MOL000358 | beta-sitosterol    | Caspase-9                           | CASP9    |
| MOL000358 | beta-sitosterol    | Transcription factor AP-1           | JUN      |
| MOL000358 | beta-sitosterol    | Caspase-3                           | CASP3    |
| MOL000358 | beta-sitosterol    | Caspase-8                           | CASP8    |
| MOL000358 | beta-sitosterol    | Protein kinase C alpha type         | PRKCA    |
| MOL000358 | beta-sitosterol    | Serum paraoxonase/arylesterase 1    | PON1     |
| MOL000358 | beta-sitosterol    | Microtubule-associated protein 2    | MAP2     |
| MOL000359 | sitosterol         | Progesterone receptor               | PGR      |
| MOL000359 | sitosterol         | Nuclear receptor coactivator 2      | NCOA2    |
| MOL000359 | sitosterol         | Mineralocorticoid receptor          | NR3C2    |
| MOL004941 | -(4-hydroxyphenyl) | Prostaglandin G/H synthase 1        | PTGS1    |
| MOL004941 | -(4-hydroxyphenyl) | Estrogen receptor                   | ESR1     |
| MOL004941 | -(4-hydroxyphenyl) | Prostaglandin G/H synthase 2        | PTGS2    |
| MOL004941 | -(4-hydroxyphenyl) | Retinoic acid receptor RXR-alpha    | RXRA     |
|           |                    | cGMP-inhibited 3',5'-cyclic         |          |
| MOL004941 | -(4-hydroxyphenyl) | phosphodiesterase A                 | PDE3A    |
| MOL004941 | -(4-hydroxyphenyl) | Beta-2 adrenergic receptor          | ADRB2    |
| MOL004941 | -(4-hydroxyphenyl) | Heat shock protein HSP 90-alpha     | HSP90AA1 |
| MOL004941 | -(4-hydroxyphenyl) | Amine oxidase [flavin-containing]   | MAOB     |
|           |                    | cAMP-dependent protein kinase       |          |
| MOL004941 | -(4-hydroxyphenyl) | catalytic subunit alpha             | PRKACA   |
|           |                    | cAMP-dependent protein kinase       |          |
| MOL004941 | -(4-hydroxyphenyl) | inhibitor alpha                     | PKIA     |
|           |                    | Sodium-dependent serotonin          |          |
| MOL004941 | -(4-hydroxyphenyl) | transporter                         | SLC6A4   |
| MOL000546 | diosgenin          | Progesterone receptor               | PGR      |
| MOL000546 | diosgenin          | Mineralocorticoid receptor          | NR3C2    |
| MOL000546 | diosgenin          | Transcription factor p65            | RELA     |
|           |                    | RAC-alpha serine/threonine-protein  |          |
| MOL000546 | diosgenin          | kinase                              | AKT1     |
| MOL000546 | diosgenin          | Cyclin-dependent kinase inhibitor 1 | CDKN1A   |
| MOL000546 | diosgenin          | Cellular tumor antigen p53          | TP63     |
| MOL000546 | diosgenin          | Prostaglandin G/H synthase 2        | PTGS2    |
| MOL000546 | diosgenin          | Fatty acid synthase                 | FASN     |
| MOL000546 | diosgenin          | Superoxide dismutase [Cu-Zn]        | SOD1     |
| MOL000546 | diosgenin          | Hypoxia-inducible factor 1-alpha    | HIF1A    |

|           |                   |                                    |          |
|-----------|-------------------|------------------------------------|----------|
|           |                   | Nuclear receptor subfamily 1 group |          |
| MOL000546 | diosgenin         | I member 2                         | NR1I2    |
| MOL000546 | diosgenin         | Cytosolic phospholipase A2         | PLA2G4A  |
|           |                   | Canalicular multispecific organic  |          |
| MOL000546 | diosgenin         | anion transporter 1                | ABCC2    |
|           |                   | Serine/threonine-protein kinase    |          |
| MOL000546 | diosgenin         | mTOR                               | MTOR     |
| MOL006331 | 5-Dihydroxyflavc  | Prostaglandin G/H synthase 1       | PTGS1    |
| MOL006331 | 5-Dihydroxyflavc  | Androgen receptor                  | AR       |
| MOL006331 | 5-Dihydroxyflavc  | Prostaglandin G/H synthase 2       | PTGS2    |
| MOL006331 | 5-Dihydroxyflavc  | Dipeptidyl peptidase 4             | DPP4     |
| MOL006331 | 5-Dihydroxyflavc  | Heat shock protein HSP 90-alpha    | HSP90AA1 |
| MOL006331 | 5-Dihydroxyflavc  | Amine oxidase [flavin-containing]  | MAOB     |
|           |                   | cAMP-dependent protein kinase      |          |
| MOL006331 | 5-Dihydroxyflavc  | catalytic subunit alpha            | PRKACA   |
| MOL009763 | aresinol-O-beta-D | DNA topoisomerase 2-alpha          | TOP2A    |
|           |                   | Sodium channel protein type 5      |          |
| MOL002879 | Diop              | subunit alpha                      | SCN5A    |
| MOL002879 | Diop              | Beta-2 adrenergic receptor         | ADRB2    |
| MOL002879 | Diop              | Muscarinic acetylcholine receptor  | CHRM3    |
| MOL000449 | Stigmasterol      | Progesterone receptor              | PGR      |
| MOL000449 | Stigmasterol      | Mineralocorticoid receptor         | NR3C2    |
| MOL000449 | Stigmasterol      | Nuclear receptor coactivator 2     | NCOA2    |
| MOL000449 | Stigmasterol      | Retinoic acid receptor RXR-alpha   | RXRA     |
| MOL000449 | Stigmasterol      | Nuclear receptor coactivator 1     | NCOA1    |
| MOL000449 | Stigmasterol      | Prostaglandin G/H synthase 1       | PTGS1    |
| MOL000449 | Stigmasterol      | Prostaglandin G/H synthase 2       | PTGS2    |
| MOL000449 | Stigmasterol      | Alpha-2A adrenergic receptor       | ADRA2A   |
|           |                   | Sodium-dependent noradrenaline     |          |
| MOL000449 | Stigmasterol      | transporter                        | SLC6A2   |
|           |                   | Sodium-dependent dopamine          |          |
| MOL000449 | Stigmasterol      | transporter                        | SLC6A3   |
| MOL000449 | Stigmasterol      | Beta-2 adrenergic receptor         | ADRB2    |
| MOL000449 | Stigmasterol      | Aldose reductase                   | AKR1B1   |
| MOL000449 | Stigmasterol      | Urokinase-type plasminogen         | PLAU     |
| MOL000449 | Stigmasterol      | Leukotriene A-4 hydrolase          | LTA4H    |
| MOL000449 | Stigmasterol      | Amine oxidase [flavin-containing]  | MAOB     |
| MOL000449 | Stigmasterol      | Amine oxidase [flavin-containing]  | MAOA     |
|           |                   | cAMP-dependent protein kinase      |          |
| MOL000449 | Stigmasterol      | catalytic subunit alpha            | PRKACA   |
| MOL000449 | Stigmasterol      | Chymotrypsinogen B                 | CTRB1    |
| MOL000449 | Stigmasterol      | Muscarinic acetylcholine receptor  | CHRM3    |
| MOL000449 | Stigmasterol      | Muscarinic acetylcholine receptor  | CHRM1    |
| MOL000449 | Stigmasterol      | Beta-1 adrenergic receptor         | ADRB1    |
|           |                   | Sodium channel protein type 5      |          |
| MOL000449 | Stigmasterol      | subunit alpha                      | SCN5A    |
| MOL000449 | Stigmasterol      | Alpha-1A adrenergic receptor       | ADRA1A   |
| MOL000449 | Stigmasterol      | Muscarinic acetylcholine receptor  | CHRM2    |
| MOL000449 | Stigmasterol      | Alpha-1B adrenergic receptor       | ADRA1B   |
|           |                   | Neuronal acetylcholine receptor    |          |
| MOL000449 | Stigmasterol      | subunit alpha-7                    | CHRNA7   |
| MOL000358 | beta-sitosterol   | Progesterone receptor              | PGR      |
| MOL000358 | beta-sitosterol   | Nuclear receptor coactivator 2     | NCOA2    |
| MOL000358 | beta-sitosterol   | Prostaglandin G/H synthase 1       | PTGS1    |
| MOL000358 | beta-sitosterol   | Prostaglandin G/H synthase 2       | PTGS2    |
| MOL000358 | beta-sitosterol   | Heat shock protein HSP 90-alpha    | HSP90AA1 |
|           |                   | Potassium voltage-gated channel    |          |
| MOL000358 | beta-sitosterol   | subfamily H member 2               | KCNH2    |
|           |                   | cAMP-dependent protein kinase      |          |
| MOL000358 | beta-sitosterol   | catalytic subunit alpha            | PRKACA   |

|           |                 |                                                                                             |                    |
|-----------|-----------------|---------------------------------------------------------------------------------------------|--------------------|
| MOL000358 | beta-sitosterol | D(1A) dopamine receptor                                                                     | DRD1               |
| MOL000358 | beta-sitosterol | Muscarinic acetylcholine receptor                                                           | CHRM3              |
| MOL000358 | beta-sitosterol | Muscarinic acetylcholine receptor<br>Sodium channel protein type 5<br>subunit alpha         | CHRM1<br>SCN5A     |
| MOL000358 | beta-sitosterol | Muscarinic acetylcholine receptor<br>cGMP-inhibited 3',5'-cyclic<br>phosphodiesterase A     | CHRM4<br>PDE3A     |
| MOL000358 | beta-sitosterol | Alpha-1A adrenergic receptor                                                                | ADRA1A             |
| MOL000358 | beta-sitosterol | Muscarinic acetylcholine receptor                                                           | CHRM2              |
| MOL000358 | beta-sitosterol | Alpha-1B adrenergic receptor                                                                | ADRA1B             |
| MOL000358 | beta-sitosterol | Beta-2 adrenergic receptor<br>Neuronal acetylcholine receptor<br>subunit alpha-2            | ADRB2<br>CHRNA2    |
| MOL000358 | beta-sitosterol | Sodium-dependent serotonin<br>transporter                                                   | SLC6A4             |
| MOL000358 | beta-sitosterol | Mu-type opioid receptor<br>Neuronal acetylcholine receptor<br>subunit alpha-7               | OPRM1<br>CHRNA7    |
| MOL000358 | beta-sitosterol | Apoptosis regulator Bcl-2                                                                   | BCL2               |
| MOL000358 | beta-sitosterol | Apoptosis regulator BAX                                                                     | BAX                |
| MOL000358 | beta-sitosterol | Caspase-9                                                                                   | CASP9              |
| MOL000358 | beta-sitosterol | Transcription factor AP-1                                                                   | JUN                |
| MOL000358 | beta-sitosterol | Caspase-3                                                                                   | CASP3              |
| MOL000358 | beta-sitosterol | Caspase-8                                                                                   | CASP8              |
| MOL000358 | beta-sitosterol | Protein kinase C alpha type                                                                 | PRKCA              |
| MOL000358 | beta-sitosterol | Serum paraoxonase/arylesterase 1                                                            | PON1               |
| MOL000358 | beta-sitosterol | Microtubule-associated protein 2                                                            | MAP2               |
| MOL003648 | Inermin         | Prostaglandin G/H synthase 1                                                                | PTGS1              |
| MOL003648 | Inermin         | Muscarinic acetylcholine receptor<br>Sodium channel protein type 5<br>subunit alpha         | CHRM3<br>SCN5A     |
| MOL003648 | Inermin         | Prostaglandin G/H synthase 2                                                                | PTGS2              |
| MOL003648 | Inermin         | Retinoic acid receptor RXR-alpha                                                            | RXRA               |
| MOL003648 | Inermin         | Alpha-1B adrenergic receptor                                                                | ADRA1B             |
| MOL003648 | Inermin         | Beta-2 adrenergic receptor                                                                  | ADRB2              |
| MOL003648 | Inermin         | Alpha-1D adrenergic receptor<br>Sodium-dependent serotonin<br>transporter                   | ADRA1D<br>SLC6A4   |
| MOL003648 | Inermin         | Heat shock protein HSP 90-alpha<br>Neuronal acetylcholine receptor<br>subunit alpha-7       | HSP90AA1<br>CHRNA7 |
| MOL003648 | Inermin         | cAMP-dependent protein kinase<br>catalytic subunit alpha                                    | PRKACA             |
| MOL003648 | Inermin         | Trypsin-1                                                                                   | PRSS1              |
| MOL003648 | Inermin         | Nuclear receptor coactivator 1                                                              | NCOA1              |
| MOL000422 | kaempferol      | Nitric oxide synthase, inducible                                                            | NOS2               |
| MOL000422 | kaempferol      | Prostaglandin G/H synthase 1                                                                | PTGS1              |
| MOL000422 | kaempferol      | Androgen receptor                                                                           | AR                 |
| MOL000422 | kaempferol      | Peroxisome proliferator-activated<br>receptor gamma                                         | PPARG              |
| MOL000422 | kaempferol      | Prostaglandin G/H synthase 2                                                                | PTGS2              |
| MOL000422 | kaempferol      | Heat shock protein HSP 90-alpha<br>cAMP-dependent protein kinase<br>catalytic subunit alpha | HSP90AA1<br>PRKACA |
| MOL000422 | kaempferol      | Nuclear receptor coactivator 2                                                              | NCOA2              |
| MOL000422 | kaempferol      | Dipeptidyl peptidase 4                                                                      | DPP4               |
| MOL000422 | kaempferol      | Trypsin-1                                                                                   | PRSS1              |
| MOL000422 | kaempferol      | Progesterone receptor                                                                       | PGR                |
| MOL000422 | kaempferol      | Prothrombin                                                                                 | F2                 |

|           |                |                                                                   |         |
|-----------|----------------|-------------------------------------------------------------------|---------|
| MOL000422 | kaempferol     | Muscarinic acetylcholine receptor                                 | CHRM1   |
| MOL000422 | kaempferol     | Acetylcholinesterase                                              | ACHE    |
| MOL000422 | kaempferol     | Sodium-dependent noradrenaline transporter                        | SLC6A2  |
| MOL000422 | kaempferol     | Muscarinic acetylcholine receptor                                 | CHRM2   |
| MOL000422 | kaempferol     | Alpha-1B adrenergic receptor                                      | ADRA1B  |
| MOL000422 | kaempferol     | DNA topoisomerase 2-alpha                                         | TOP2A   |
| MOL000422 | kaempferol     | Coagulation factor VII                                            | F7      |
| MOL000422 | kaempferol     | Transcription factor p65                                          | RELA    |
| MOL000422 | kaempferol     | Inhibitor of nuclear factor kappa-B kinase subunit beta           | IKBKB   |
| MOL000422 | kaempferol     | RAC-alpha serine/threonine-protein kinase                         | AKT1    |
| MOL000422 | kaempferol     | Apoptosis regulator Bcl-2                                         | BCL2    |
| MOL000422 | kaempferol     | Apoptosis regulator BAX                                           | BAX     |
| MOL000422 | kaempferol     | Tumor necrosis factor                                             | TNFSF15 |
| MOL000422 | kaempferol     | Transcription factor AP-1                                         | JUN     |
| MOL000422 | kaempferol     | Activator of 90 kDa heat shock protein ATPase homolog 1           | AHSA1   |
| MOL000422 | kaempferol     | Caspase-3                                                         | CASP3   |
| MOL000422 | kaempferol     | Mitogen-activated protein kinase 8                                | MAPK8   |
| MOL000422 | kaempferol     | Interstitial collagenase                                          | MMP1    |
| MOL000422 | kaempferol     | Signal transducer and activator of transcription 1-alpha/beta     | STAT1   |
| MOL000422 | kaempferol     | Peroxisome proliferator-activated receptor gamma                  | PPARG   |
| MOL000422 | kaempferol     | Heme oxygenase 1                                                  | HMOX1   |
| MOL000422 | kaempferol     | Cytochrome P450 3A4                                               | CYP3A4  |
| MOL000422 | kaempferol     | Cytochrome P450 1A1                                               | CYP1A1  |
| MOL000422 | kaempferol     | Intercellular adhesion molecule 1                                 | ICAM1   |
| MOL000422 | kaempferol     | E-selectin                                                        | SELE    |
| MOL000422 | kaempferol     | Vascular cell adhesion protein 1                                  | VCAM1   |
| MOL000422 | kaempferol     | Nuclear receptor subfamily 1 group I member 2                     | NR1I2   |
| MOL000422 | kaempferol     | Cytochrome P450 1B1                                               | CYP1B1  |
| MOL000422 | kaempferol     | Arachidonate 5-lipoxygenase                                       | ALOX5   |
| MOL000422 | kaempferol     | Hyaluronan synthase 2                                             | HAS2    |
| MOL000422 | kaempferol     | Aryl hydrocarbon receptor                                         | AHR     |
| MOL000422 | kaempferol     | 26S proteasome non-ATPase regulatory subunit 3                    | PSMD3   |
| MOL000422 | kaempferol     | Solute carrier family 2, facilitated glucose transporter member 4 | SLC2A4  |
| MOL000422 | kaempferol     | Nuclear receptor subfamily 1 group I member 3                     | NR1I3   |
| MOL000422 | kaempferol     | Insulin receptor                                                  | INSR    |
| MOL000422 | kaempferol     | Type I iodothyronine deiodinase                                   | DIO1    |
| MOL000422 | kaempferol     | Serine/threonine-protein phosphatase 2B catalytic subunit         | PPP3CA  |
| MOL000422 | kaempferol     | Glutathione S-transferase Mu 1                                    | GSTM1   |
| MOL000422 | kaempferol     | Glutathione S-transferase Mu 2                                    | GSTM2   |
| MOL000422 | kaempferol     | Aldo-keto reductase family 1 member C3                            | AKR1C3  |
| MOL000422 | kaempferol     | Antileukoproteinase                                               | SLPI    |
| MOL005308 | Aposiopolamine | Muscarinic acetylcholine receptor                                 | CHRM3   |
| MOL005308 | Aposiopolamine | Muscarinic acetylcholine receptor                                 | CHRM1   |
| MOL005308 | Aposiopolamine | Sodium-dependent noradrenaline transporter                        | SLC6A2  |
| MOL005308 | Aposiopolamine | Sodium-dependent dopamine transporter                             | SLC6A3  |
| MOL005308 | Aposiopolamine | Beta-2 adrenergic receptor                                        | ADRB2   |



|           |                 |                                                                                            |          |
|-----------|-----------------|--------------------------------------------------------------------------------------------|----------|
| MOL005308 | Aposiopolamine  | Sodium-dependent serotonin transporter                                                     | SLC6A4   |
| MOL005308 | Aposiopolamine  | Dipeptidyl peptidase 4                                                                     | DPP4     |
| MOL005317 | oxyharringtonin | Androgen receptor                                                                          | AR       |
| MOL005317 | oxyharringtonin | Mineralocorticoid receptor                                                                 | NR3C2    |
| MOL005318 | Dianthramine    | Prostaglandin G/H synthase 1                                                               | PTGS1    |
| MOL005318 | Dianthramine    | Prostaglandin G/H synthase 2                                                               | PTGS2    |
| MOL005318 | Dianthramine    | Heat shock protein HSP 90-alpha                                                            | HSP90AA1 |
| MOL005320 | arachidonate    | Prostaglandin G/H synthase 1                                                               | PTGS1    |
| MOL005320 | arachidonate    | Prostaglandin G/H synthase 2                                                               | PTGS2    |
| MOL005320 | arachidonate    | Retinoic acid receptor RXR-gamma                                                           | RXRG     |
| MOL005320 | arachidonate    | Nuclear receptor coactivator 2                                                             | NCOA2    |
| MOL005321 | Frutinone A     | Prostaglandin G/H synthase 1                                                               | PTGS1    |
| MOL005321 | Frutinone A     | Prothrombin                                                                                | F2       |
| MOL005321 | Frutinone A     | Androgen receptor                                                                          | AR       |
| MOL005321 | Frutinone A     | Sodium channel protein type 5 subunit alpha                                                | SCN5A    |
| MOL005321 | Frutinone A     | Peroxisome proliferator-activated receptor gamma                                           | PPARG    |
| MOL005321 | Frutinone A     | Prostaglandin G/H synthase 2                                                               | PTGS2    |
| MOL005321 | Frutinone A     | Retinoic acid receptor RXR-alpha cGMP-inhibited 3',5'-cyclic phosphodiesterase A           | RXRA     |
| MOL005321 | Frutinone A     | phosphodiesterase A                                                                        | PDE3A    |
| MOL005321 | Frutinone A     | Beta-2 adrenergic receptor                                                                 | ADRB2    |
| MOL005321 | Frutinone A     | Dipeptidyl peptidase 4                                                                     | DPP4     |
| MOL005321 | Frutinone A     | Heat shock protein HSP 90-alpha Neuronal acetylcholine receptor subunit alpha-7            | HSP90AA1 |
| MOL005321 | Frutinone A     | cAMP-dependent protein kinase catalytic subunit alpha                                      | CHRNA7   |
| MOL005321 | Frutinone A     | Acetylcholinesterase                                                                       | PRKACA   |
| MOL005321 | Frutinone A     | Acetylcholinesterase                                                                       | ACHE     |
| MOL005344 | ginsenoside rh2 | Apoptosis regulator BAX                                                                    | BAX      |
| MOL005344 | ginsenoside rh2 | Tumor necrosis factor                                                                      | TNFSF15  |
| MOL005344 | ginsenoside rh2 | Caspase-3                                                                                  | CASP3    |
| MOL005344 | ginsenoside rh2 | Prostaglandin G/H synthase 2                                                               | PTGS2    |
| MOL005344 | ginsenoside rh2 | NF-kappa-B inhibitor alpha                                                                 | NFKBIA   |
| MOL005344 | ginsenoside rh2 | Interleukin-1 beta                                                                         | IL1B     |
| MOL005344 | ginsenoside rh2 | Caspase-1                                                                                  | CASP1    |
| MOL005344 | ginsenoside rh2 | Interferon gamma Pituitary adenylate cyclase-activating polypeptide                        | IFNG     |
| MOL005344 | ginsenoside rh2 | activating polypeptide                                                                     | ADCYAP1  |
| MOL005344 | ginsenoside rh2 | Proteasome assembly chaperone 1 Dual specificity mitogen-activated protein kinase kinase 4 | PSMG1    |
| MOL005344 | ginsenoside rh2 | Solute carrier family 2, facilitated glucose transporter member 4                          | MAP2K4   |
| MOL005344 | ginsenoside rh2 | glucose transporter member 4                                                               | SLC2A4   |
| MOL005348 | insenoside-Rh4  | Mineralocorticoid receptor                                                                 | NR3C2    |
| MOL005348 | insenoside-Rh4  | Nuclear receptor coactivator 2                                                             | NCOA2    |
| MOL005356 | Girinimbin      | Prostaglandin G/H synthase 1                                                               | PTGS1    |
| MOL005356 | Girinimbin      | Sodium channel protein type 5 subunit alpha                                                | SCN5A    |
| MOL005356 | Girinimbin      | Prostaglandin G/H synthase 2                                                               | PTGS2    |
| MOL005356 | Girinimbin      | Retinoic acid receptor RXR-alpha                                                           | RXRA     |
| MOL005356 | Girinimbin      | Beta-2 adrenergic receptor Neuronal acetylcholine receptor subunit alpha-7                 | ADRB2    |
| MOL005356 | Girinimbin      | cAMP-dependent protein kinase catalytic subunit alpha                                      | CHRNA7   |
| MOL005356 | Girinimbin      | Nuclear receptor coactivator 2                                                             | PRKACA   |
| MOL005356 | Girinimbin      | Nuclear receptor coactivator 2                                                             | NCOA2    |
| MOL005376 | Panaxadiol      | Glucocorticoid receptor                                                                    | NR3C1    |

|           |               |                                                                                       |          |
|-----------|---------------|---------------------------------------------------------------------------------------|----------|
| MOL005384 | suchilactone  | Potassium voltage-gated channel subfamily H member 2                                  | KCNH2    |
| MOL005384 | suchilactone  | Sodium channel protein type 5 subunit alpha                                           | SCN5A    |
| MOL005384 | suchilactone  | Coagulation factor X                                                                  | F10      |
| MOL005384 | suchilactone  | Prostaglandin G/H synthase 2                                                          | PTGS2    |
| MOL005384 | suchilactone  | Coagulation factor VII                                                                | F7       |
| MOL005384 | suchilactone  | Tyrosine-protein phosphatase non-receptor type 1                                      | PTPN1    |
| MOL005384 | suchilactone  | Beta-2 adrenergic receptor                                                            | ADRB2    |
| MOL005384 | suchilactone  | Heat shock protein HSP 90-alpha                                                       | HSP90AA1 |
| MOL005384 | suchilactone  | Nuclear receptor coactivator 1                                                        | NCOA1    |
| MOL005384 | suchilactone  | Prostaglandin G/H synthase 1                                                          | PTGS1    |
| MOL005384 | suchilactone  | Retinoic acid receptor RXR-alpha cGMP-inhibited 3',5'-cyclic                          | RXRA     |
| MOL005384 | suchilactone  | phosphodiesterase A                                                                   | PDE3A    |
| MOL005384 | suchilactone  | Alpha-1D adrenergic receptor cAMP-dependent protein kinase                            | ADRA1D   |
| MOL005384 | suchilactone  | catalytic subunit alpha                                                               | PRKACA   |
| MOL005399 | alexandrin_qt | Progesterone receptor                                                                 | PGR      |
| MOL000787 | Fumarine      | Prostaglandin G/H synthase 1                                                          | PTGS1    |
| MOL000787 | Fumarine      | Muscarinic acetylcholine receptor                                                     | CHRM3    |
| MOL000787 | Fumarine      | Potassium voltage-gated channel subfamily H member 2                                  | KCNH2    |
| MOL000787 | Fumarine      | Muscarinic acetylcholine receptor                                                     | CHRM1    |
| MOL000787 | Fumarine      | Sodium channel protein type 5 subunit alpha                                           | SCN5A    |
| MOL000787 | Fumarine      | Coagulation factor X                                                                  | F10      |
| MOL000787 | Fumarine      | Muscarinic acetylcholine receptor                                                     | CHRM5    |
| MOL000787 | Fumarine      | Prostaglandin G/H synthase 2                                                          | PTGS2    |
| MOL000787 | Fumarine      | Coagulation factor VII                                                                | F7       |
| MOL000787 | Fumarine      | Muscarinic acetylcholine receptor                                                     | CHRM4    |
| MOL000787 | Fumarine      | Delta-type opioid receptor                                                            | OPRD1    |
| MOL000787 | Fumarine      | Alpha-1B adrenergic receptor                                                          | ADRA1B   |
| MOL000787 | Fumarine      | Beta-2 adrenergic receptor                                                            | ADRB2    |
| MOL000787 | Fumarine      | Alpha-1D adrenergic receptor                                                          | ADRA1D   |
| MOL000787 | Fumarine      | Mu-type opioid receptor                                                               | OPRM1    |
| MOL000787 | Fumarine      | Heat shock protein HSP 90-alpha cAMP-dependent protein kinase                         | HSP90AA1 |
| MOL000787 | Fumarine      | catalytic subunit alpha                                                               | PRKACA   |
| MOL000787 | Fumarine      | Sodium-dependent serotonin transporter                                                | SLC6A4   |
| MOL000787 | Fumarine      | Voltage-dependent L-type calcium channel subunit alpha-1S cGMP-inhibited 3',5'-cyclic | CACNA1S  |
| MOL000787 | Fumarine      | phosphodiesterase A                                                                   | PDE3A    |
| MOL000787 | Fumarine      | Sodium-dependent dopamine transporter                                                 | SLC6A3   |
| MOL000787 | Fumarine      | cAMP-specific 3',5'-cyclic phosphodiesterase 4D                                       | PDE4D    |
| MOL000787 | Fumarine      | DNA topoisomerase 2-alpha                                                             | TOP2A    |
| MOL000787 | Fumarine      | D(1A) dopamine receptor                                                               | DRD1     |
| MOL000787 | Fumarine      | Vascular endothelial growth factor receptor 2                                         | KDR      |
| MOL000359 | sitosterol    | Progesterone receptor                                                                 | PGR      |
| MOL000359 | sitosterol    | Nuclear receptor coactivator 2                                                        | NCOA2    |
| MOL000359 | sitosterol    | Mineralocorticoid receptor                                                            | NR3C2    |
| MOL000449 | Stigmasterol  | Progesterone receptor                                                                 | PGR      |
| MOL000449 | Stigmasterol  | Mineralocorticoid receptor                                                            | NR3C2    |
| MOL000449 | Stigmasterol  | Nuclear receptor coactivator 2                                                        | NCOA2    |

|           |                    |                                                                                               |                    |
|-----------|--------------------|-----------------------------------------------------------------------------------------------|--------------------|
| MOL000449 | Stigmasterol       | Retinoic acid receptor RXR-alpha                                                              | RXRA               |
| MOL000449 | Stigmasterol       | Nuclear receptor coactivator 1                                                                | NCOA1              |
| MOL000449 | Stigmasterol       | Prostaglandin G/H synthase 1                                                                  | PTGS1              |
| MOL000449 | Stigmasterol       | Prostaglandin G/H synthase 2                                                                  | PTGS2              |
| MOL000449 | Stigmasterol       | Alpha-2A adrenergic receptor<br>Sodium-dependent noradrenaline<br>transporter                 | ADRA2A<br>SLC6A2   |
| MOL000449 | Stigmasterol       | Sodium-dependent dopamine<br>transporter                                                      | SLC6A3             |
| MOL000449 | Stigmasterol       | Beta-2 adrenergic receptor                                                                    | ADRB2              |
| MOL000449 | Stigmasterol       | Aldose reductase                                                                              | AKR1B1             |
| MOL000449 | Stigmasterol       | Urokinase-type plasminogen                                                                    | PLAU               |
| MOL000449 | Stigmasterol       | Leukotriene A-4 hydrolase                                                                     | LTA4H              |
| MOL000449 | Stigmasterol       | Amine oxidase [flavin-containing]                                                             | MAOB               |
| MOL000449 | Stigmasterol       | Amine oxidase [flavin-containing]<br>cAMP-dependent protein kinase<br>catalytic subunit alpha | MAOA<br>PRKACA     |
| MOL000449 | Stigmasterol       | Chymotrypsinogen B                                                                            | CTRB1              |
| MOL000449 | Stigmasterol       | Muscarinic acetylcholine receptor                                                             | CHRM3              |
| MOL000449 | Stigmasterol       | Muscarinic acetylcholine receptor                                                             | CHRM1              |
| MOL000449 | Stigmasterol       | Beta-1 adrenergic receptor<br>Sodium channel protein type 5<br>subunit alpha                  | ADRB1<br>SCN5A     |
| MOL000449 | Stigmasterol       | Alpha-1A adrenergic receptor                                                                  | ADRA1A             |
| MOL000449 | Stigmasterol       | Muscarinic acetylcholine receptor                                                             | CHRM2              |
| MOL000449 | Stigmasterol       | Alpha-1B adrenergic receptor<br>Neuronal acetylcholine receptor<br>subunit alpha-7            | ADRA1B<br>CHRNA7   |
| MOL000449 | Stigmasterol       | Progesterone receptor                                                                         | PGR                |
| MOL001510 | 24-epicampesterol  | Nuclear receptor coactivator 2                                                                | NCOA2              |
| MOL001645 | Linoleyl acetate   | Prostaglandin G/H synthase 1                                                                  | PTGS1              |
| MOL001645 | Linoleyl acetate   | Prostaglandin G/H synthase 2                                                                  | PTGS2              |
| MOL001645 | Linoleyl acetate   | Nuclear receptor coactivator 2                                                                | NCOA2              |
| MOL001645 | Linoleyl acetate   | Retinoic acid receptor RXR-alpha                                                              | RXRA               |
| MOL001771 | iferast-5-en-3beta | Progesterone receptor                                                                         | PGR                |
| MOL001771 | iferast-5-en-3beta | Nuclear receptor coactivator 2                                                                | NCOA2              |
| MOL001792 | DFV                | Prostaglandin G/H synthase 1                                                                  | PTGS1              |
| MOL001792 | DFV                | Estrogen receptor                                                                             | ESR1               |
| MOL001792 | DFV                | Prostaglandin G/H synthase 2                                                                  | PTGS2              |
| MOL001792 | DFV                | Retinoic acid receptor RXR-alpha                                                              | RXRA               |
| MOL001792 | DFV                | Beta-2 adrenergic receptor                                                                    | ADRB2              |
| MOL001792 | DFV                | Heat shock protein HSP 90-alpha<br>cAMP-dependent protein kinase<br>catalytic subunit alpha   | HSP90AA1<br>PRKACA |
| MOL001792 | DFV                | Amine oxidase [flavin-containing]<br>Sodium-dependent serotonin<br>transporter                | MAOB<br>SLC6A4     |
| MOL001792 | DFV                | cAMP-dependent protein kinase<br>inhibitor alpha                                              | PKIA               |
| MOL003044 | Chryseriol         | Nitric oxide synthase, inducible                                                              | NOS2               |
| MOL003044 | Chryseriol         | Prostaglandin G/H synthase 1                                                                  | PTGS1              |
| MOL003044 | Chryseriol         | Estrogen receptor                                                                             | ESR1               |
| MOL003044 | Chryseriol         | Androgen receptor                                                                             | AR                 |
| MOL003044 | Chryseriol         | Peroxisome proliferator-activated<br>receptor gamma                                           | PPARG              |
| MOL003044 | Chryseriol         | Prostaglandin G/H synthase 2                                                                  | PTGS2              |
| MOL003044 | Chryseriol         | Dipeptidyl peptidase 4                                                                        | DPP4               |
| MOL003044 | Chryseriol         | Mitogen-activated protein kinase 14                                                           | MAPK14             |
| MOL003044 | Chryseriol         | Glycogen synthase kinase-3 beta                                                               | GSK3B              |
| MOL003044 | Chryseriol         | Heat shock protein HSP 90-alpha                                                               | HSP90AA1           |

|           |                      |                                                                                      |          |
|-----------|----------------------|--------------------------------------------------------------------------------------|----------|
| MOL003044 | Chryseriol           | Serine/threonine-protein kinase<br>cAMP-dependent protein kinase                     | CHEK1    |
| MOL003044 | Chryseriol           | catalytic subunit alpha                                                              | PRKACA   |
| MOL003044 | Chryseriol           | Trypsin-1                                                                            | PRSS1    |
| MOL003044 | Chryseriol           | Nuclear receptor coactivator 2                                                       | NCOA2    |
| MOL003044 | Chryseriol           | Nuclear receptor coactivator 1                                                       | NCOA1    |
| MOL003542 | opentenyl-kaempferol | Prothrombin                                                                          | F2       |
| MOL003542 | opentenyl-kaempferol | Estrogen receptor                                                                    | ESR1     |
| MOL003542 | opentenyl-kaempferol | Androgen receptor                                                                    | AR       |
| MOL003542 | opentenyl-kaempferol | Peroxisome proliferator-activated<br>receptor gamma                                  | PPARG    |
| MOL003542 | opentenyl-kaempferol | Coagulation factor X                                                                 | F10      |
| MOL003542 | opentenyl-kaempferol | Prostaglandin G/H synthase 2                                                         | PTGS2    |
| MOL003542 | opentenyl-kaempferol | DNA topoisomerase 2-alpha                                                            | TOP2A    |
| MOL003542 | opentenyl-kaempferol | Dipeptidyl peptidase 4                                                               | DPP4     |
| MOL003542 | opentenyl-kaempferol | Glycogen synthase kinase-3 beta                                                      | GSK3B    |
| MOL003542 | opentenyl-kaempferol | Heat shock protein HSP 90-alpha                                                      | HSP90AA1 |
| MOL003542 | opentenyl-kaempferol | Serine/threonine-protein kinase                                                      | CHEK1    |
| MOL003542 | opentenyl-kaempferol | Trypsin-1                                                                            | PRSS1    |
| MOL003542 | opentenyl-kaempferol | Prostaglandin G/H synthase 1                                                         | PTGS1    |
| MOL003542 | opentenyl-kaempferol | Sodium channel protein type 5<br>subunit alpha                                       | SCN5A    |
| MOL003542 | opentenyl-kaempferol | Coagulation factor VII                                                               | F7       |
| MOL003542 | opentenyl-kaempferol | Vascular endothelial growth factor<br>receptor 2                                     | KDR      |
| MOL003542 | opentenyl-kaempferol | Retinoic acid receptor RXR-alpha                                                     | RXRA     |
| MOL003542 | opentenyl-kaempferol | Mitogen-activated protein kinase 14                                                  | MAPK14   |
| MOL003542 | opentenyl-kaempferol | Cyclin-A2                                                                            | CCNA2    |
| MOL003542 | opentenyl-kaempferol | Nuclear receptor coactivator 2<br>cGMP-inhibited 3',5'-cyclic<br>phosphodiesterase A | NCOA2    |
| MOL003542 | opentenyl-kaempferol | Potassium voltage-gated channel<br>subfamily H member 2                              | PDE3A    |
| MOL003542 | opentenyl-kaempferol | Glycogen phosphorylase, muscle                                                       | KCNH2    |
| MOL000359 | sitosterol           | Progesterone receptor                                                                | PYGM     |
| MOL000359 | sitosterol           | Nuclear receptor coactivator 2                                                       | PGR      |
| MOL000359 | sitosterol           | Mineralocorticoid receptor                                                           | NCOA2    |
| MOL000422 | kaempferol           | Nitric oxide synthase, inducible                                                     | NR3C2    |
| MOL000422 | kaempferol           | Prostaglandin G/H synthase 1                                                         | NOS2     |
| MOL000422 | kaempferol           | Androgen receptor                                                                    | PTGS1    |
| MOL000422 | kaempferol           | Peroxisome proliferator-activated<br>receptor gamma                                  | AR       |
| MOL000422 | kaempferol           | Prostaglandin G/H synthase 2                                                         | PPARG    |
| MOL000422 | kaempferol           | Heat shock protein HSP 90-alpha<br>cAMP-dependent protein kinase                     | PTGS2    |
| MOL000422 | kaempferol           | catalytic subunit alpha                                                              | HSP90AA1 |
| MOL000422 | kaempferol           | Nuclear receptor coactivator 2                                                       | PRKACA   |
| MOL000422 | kaempferol           | Dipeptidyl peptidase 4                                                               | NCOA2    |
| MOL000422 | kaempferol           | Trypsin-1                                                                            | DPP4     |
| MOL000422 | kaempferol           | Progesterone receptor                                                                | PRSS1    |
| MOL000422 | kaempferol           | Prothrombin                                                                          | PGR      |
| MOL000422 | kaempferol           | Muscarinic acetylcholine receptor                                                    | F2       |
| MOL000422 | kaempferol           | Acetylcholinesterase                                                                 | CHRM1    |
| MOL000422 | kaempferol           | Sodium-dependent noradrenaline<br>transporter                                        | ACHE     |
| MOL000422 | kaempferol           | Muscarinic acetylcholine receptor                                                    | SLC6A2   |
| MOL000422 | kaempferol           | Alpha-1B adrenergic receptor                                                         | CHRM2    |
| MOL000422 | kaempferol           | DNA topoisomerase 2-alpha                                                            | ADRA1B   |
| MOL000422 | kaempferol           | Coagulation factor VII                                                               | TOP2A    |
| MOL000422 | kaempferol           | Transcription factor p65                                                             | F7       |
| MOL000422 | kaempferol           |                                                                                      | RELA     |

|           |                 |                                                                                                  |          |
|-----------|-----------------|--------------------------------------------------------------------------------------------------|----------|
| MOL000422 | kaempferol      | Inhibitor of nuclear factor kappa-B<br>kinase subunit beta<br>RAC-alpha serine/threonine-protein | IKBKB    |
| MOL000422 | kaempferol      | kinase                                                                                           | AKT1     |
| MOL000422 | kaempferol      | Apoptosis regulator Bcl-2                                                                        | BCL2     |
| MOL000422 | kaempferol      | Apoptosis regulator BAX                                                                          | BAX      |
| MOL000422 | kaempferol      | Tumor necrosis factor                                                                            | TNFSF15  |
| MOL000422 | kaempferol      | Transcription factor AP-1<br>Activator of 90 kDa heat shock                                      | JUN      |
| MOL000422 | kaempferol      | protein ATPase homolog 1                                                                         | AHSA1    |
| MOL000422 | kaempferol      | Caspase-3                                                                                        | CASP3    |
| MOL000422 | kaempferol      | Mitogen-activated protein kinase 8                                                               | MAPK8    |
| MOL000422 | kaempferol      | Interstitial collagenase<br>Signal transducer and activator of                                   | MMP1     |
| MOL000422 | kaempferol      | transcription 1-alpha/beta<br>Peroxisome proliferator-activated                                  | STAT1    |
| MOL000422 | kaempferol      | receptor gamma                                                                                   | PPARG    |
| MOL000422 | kaempferol      | Heme oxygenase 1                                                                                 | HMOX1    |
| MOL000422 | kaempferol      | Cytochrome P450 3A4                                                                              | CYP3A4   |
| MOL000422 | kaempferol      | Cytochrome P450 1A1                                                                              | CYP1A1   |
| MOL000422 | kaempferol      | Intercellular adhesion molecule 1                                                                | ICAM1    |
| MOL000422 | kaempferol      | E-selectin                                                                                       | SELE     |
| MOL000422 | kaempferol      | Vascular cell adhesion protein 1<br>Nuclear receptor subfamily 1 group                           | VCAM1    |
| MOL000422 | kaempferol      | I member 2                                                                                       | NR1I2    |
| MOL000422 | kaempferol      | Cytochrome P450 1B1                                                                              | CYP1B1   |
| MOL000422 | kaempferol      | Arachidonate 5-lipoxygenase                                                                      | ALOX5    |
| MOL000422 | kaempferol      | Hyaluronan synthase 2                                                                            | HAS2     |
| MOL000422 | kaempferol      | Aryl hydrocarbon receptor<br>26S proteasome non-ATPase                                           | AHR      |
| MOL000422 | kaempferol      | regulatory subunit 3<br>Solute carrier family 2, facilitated                                     | PSMD3    |
| MOL000422 | kaempferol      | glucose transporter member 4<br>Nuclear receptor subfamily 1 group                               | SLC2A4   |
| MOL000422 | kaempferol      | I member 3                                                                                       | NR1I3    |
| MOL000422 | kaempferol      | Insulin receptor                                                                                 | INSR     |
| MOL000422 | kaempferol      | Type I iodothyronine deiodinase<br>Serine/threonine-protein                                      | DIO1     |
| MOL000422 | kaempferol      | phosphatase 2B catalytic subunit                                                                 | PPP3CA   |
| MOL000422 | kaempferol      | Glutathione S-transferase Mu 1                                                                   | GSTM1    |
| MOL000422 | kaempferol      | Glutathione S-transferase Mu 2<br>Aldo-keto reductase family 1                                   | GSTM2    |
| MOL000422 | kaempferol      | member C3                                                                                        | AKR1C3   |
| MOL000422 | kaempferol      | Antileukoproteinase                                                                              | SLPI     |
| MOL004367 | olivil          | Prostaglandin G/H synthase 2                                                                     | PTGS2    |
| MOL004367 | olivil          | Heat shock protein HSP 90-alpha                                                                  | HSP90AA1 |
| MOL004367 | olivil          | Nuclear receptor coactivator 2                                                                   | NCOA2    |
| MOL004373 | Anhydroicaritin | Nitric oxide synthase, inducible                                                                 | NOS2     |
| MOL004373 | Anhydroicaritin | Prostaglandin G/H synthase 1                                                                     | PTGS1    |
| MOL004373 | Anhydroicaritin | Muscarinic acetylcholine receptor                                                                | CHRM3    |
| MOL004373 | Anhydroicaritin | Prothrombin<br>Potassium voltage-gated channel                                                   | F2       |
| MOL004373 | Anhydroicaritin | subfamily H member 2                                                                             | KCNH2    |
| MOL004373 | Anhydroicaritin | Muscarinic acetylcholine receptor                                                                | CHRM1    |
| MOL004373 | Anhydroicaritin | Estrogen receptor                                                                                | ESR1     |
| MOL004373 | Anhydroicaritin | Androgen receptor                                                                                | AR       |
| MOL004373 | Anhydroicaritin | Sodium channel protein type 5<br>subunit alpha                                                   | SCN5A    |
| MOL004373 | Anhydroicaritin | Peroxisome proliferator-activated<br>receptor gamma                                              | PPARG    |

|           |                  |                                                      |          |
|-----------|------------------|------------------------------------------------------|----------|
| MOL004373 | Anhydroicaritin  | Coagulation factor X                                 | F10      |
| MOL004373 | Anhydroicaritin  | Muscarinic acetylcholine receptor                    | CHRM5    |
| MOL004373 | Anhydroicaritin  | Prostaglandin G/H synthase 2                         | PTGS2    |
| MOL004373 | Anhydroicaritin  | Retinoic acid receptor RXR-alpha                     | RXRA     |
| MOL004373 | Anhydroicaritin  | Acetylcholinesterase                                 | ACHE     |
| MOL004373 | Anhydroicaritin  | Alpha-1B adrenergic receptor                         | ADRA1B   |
| MOL004373 | Anhydroicaritin  | Beta-2 adrenergic receptor                           | ADRB2    |
| MOL004373 | Anhydroicaritin  | Estrogen receptor beta                               | ESR2     |
| MOL004373 | Anhydroicaritin  | Dipeptidyl peptidase 4                               | DPP4     |
| MOL004373 | Anhydroicaritin  | Mitogen-activated protein kinase 14                  | MAPK14   |
| MOL004373 | Anhydroicaritin  | Glycogen synthase kinase-3 beta                      | GSK3B    |
| MOL004373 | Anhydroicaritin  | Heat shock protein HSP 90-alpha                      | HSP90AA1 |
| MOL004373 | Anhydroicaritin  | Serine/threonine-protein kinase                      | CHEK1    |
| MOL004373 | Anhydroicaritin  | Trypsin-1                                            | PRSS1    |
| MOL004373 | Anhydroicaritin  | Nuclear receptor coactivator 2                       | NCOA2    |
| MOL004373 | Anhydroicaritin  | Coagulation factor VII                               | F7       |
| MOL004373 | Anhydroicaritin  | Vascular endothelial growth factor receptor 2        | KDR      |
| MOL004373 | Anhydroicaritin  | DNA topoisomerase 2-alpha                            | TOP2A    |
| MOL004373 | Anhydroicaritin  | Cyclin-A2                                            | CCNA2    |
| MOL004373 | Anhydroicaritin  | Nuclear receptor coactivator 1                       | NCOA1    |
| MOL004380 | didehydro-3,15,1 | Prostaglandin G/H synthase 1                         | PTGS1    |
| MOL004380 | didehydro-3,15,1 | D(1A) dopamine receptor                              | DRD1     |
| MOL004380 | didehydro-3,15,1 | Muscarinic acetylcholine receptor                    | CHRM3    |
| MOL004380 | didehydro-3,15,1 | Potassium voltage-gated channel subfamily H member 2 | KCNH2    |
| MOL004380 | didehydro-3,15,1 | Muscarinic acetylcholine receptor                    | CHRM1    |
| MOL004380 | didehydro-3,15,1 | Androgen receptor                                    | AR       |
| MOL004380 | didehydro-3,15,1 | D(1B) dopamine receptor                              | DRD5     |
| MOL004380 | didehydro-3,15,1 | Beta-1 adrenergic receptor                           | ADRB1    |
| MOL004380 | didehydro-3,15,1 | Sodium channel protein type 5 subunit alpha          | SCN5A    |
| MOL004380 | didehydro-3,15,1 | Muscarinic acetylcholine receptor                    | CHRM5    |
| MOL004380 | didehydro-3,15,1 | Prostaglandin G/H synthase 2                         | PTGS2    |
| MOL004380 | didehydro-3,15,1 | Alpha-2A adrenergic receptor                         | ADRA2A   |
| MOL004380 | didehydro-3,15,1 | Muscarinic acetylcholine receptor                    | CHRM4    |
| MOL004380 | didehydro-3,15,1 | Delta-type opioid receptor                           | OPRD1    |
| MOL004380 | didehydro-3,15,1 | cGMP-inhibited 3',5'-cyclic phosphodiesterase A      | PDE3A    |
| MOL004380 | didehydro-3,15,1 | Histamine H1 receptor                                | HRH1     |
| MOL004380 | didehydro-3,15,1 | Sodium-dependent noradrenaline transporter           | SLC6A2   |
| MOL004380 | didehydro-3,15,1 | Alpha-1A adrenergic receptor                         | ADRA1A   |
| MOL004380 | didehydro-3,15,1 | Muscarinic acetylcholine receptor                    | CHRM2    |
| MOL004380 | didehydro-3,15,1 | Alpha-2B adrenergic receptor                         | ADRA2B   |
| MOL004380 | didehydro-3,15,1 | Alpha-1B adrenergic receptor                         | ADRA1B   |
| MOL004380 | didehydro-3,15,1 | Sodium-dependent dopamine transporter                | SLC6A3   |
| MOL004380 | didehydro-3,15,1 | Beta-2 adrenergic receptor                           | ADRB2    |
| MOL004380 | didehydro-3,15,1 | Alpha-1D adrenergic receptor                         | ADRA1D   |
| MOL004380 | didehydro-3,15,1 | Neuronal acetylcholine receptor subunit alpha-2      | CHRNA2   |
| MOL004380 | didehydro-3,15,1 | Sodium-dependent serotonin transporter               | SLC6A4   |
| MOL004380 | didehydro-3,15,1 | D(2) dopamine receptor                               | DRD2     |
| MOL004380 | didehydro-3,15,1 | Mu-type opioid receptor                              | OPRM1    |
| MOL004380 | didehydro-3,15,1 | Neuronal acetylcholine receptor subunit alpha-7      | CHRNA7   |
| MOL004380 | didehydro-3,15,1 | Gamma-aminobutyric acid receptor subunit gamma-3     | GABRG3   |

| MOL       | Yinyanghuo         | Gamma-aminobutyric acid receptor                      |          |
|-----------|--------------------|-------------------------------------------------------|----------|
| MOL004380 | didehydro-3,15,1   | subunit epsilon                                       | GABRE    |
| MOL004382 | Yinyanghuo A       | Estrogen receptor                                     | ESR1     |
| MOL004382 | Yinyanghuo A       | Androgen receptor                                     | AR       |
| MOL004382 | Yinyanghuo A       | Coagulation factor X                                  | F10      |
| MOL004382 | Yinyanghuo A       | Prostaglandin G/H synthase 2                          | PTGS2    |
| MOL004382 | Yinyanghuo A       | DNA topoisomerase 2-alpha                             | TOP2A    |
| MOL004382 | Yinyanghuo A       | Trypsin-1                                             | PRSS1    |
| MOL004382 | Yinyanghuo A       | Nuclear receptor coactivator 2                        | NCOA2    |
| MOL004384 | Yinyanghuo C       | Nitric oxide synthase, inducible                      | NOS2     |
| MOL004384 | Yinyanghuo C       | Androgen receptor                                     | AR       |
| MOL004384 | Yinyanghuo C       | Coagulation factor X                                  | F10      |
| MOL004384 | Yinyanghuo C       | Prostaglandin G/H synthase 2                          | PTGS2    |
| MOL004384 | Yinyanghuo C       | Acetylcholinesterase                                  | ACHE     |
| MOL004384 | Yinyanghuo C       | Estrogen receptor beta                                | ESR2     |
| MOL004384 | Yinyanghuo C       | Dipeptidyl peptidase 4                                | DPP4     |
| MOL004384 | Yinyanghuo C       | Trypsin-1                                             | PRSS1    |
| MOL004384 | Yinyanghuo C       | Nuclear receptor coactivator 2                        | NCOA2    |
| MOL004386 | Yinyanghuo E       | Nitric oxide synthase, inducible                      | NOS2     |
| MOL004386 | Yinyanghuo E       | Androgen receptor                                     | AR       |
| MOL004386 | Yinyanghuo E       | Coagulation factor X                                  | F10      |
| MOL004386 | Yinyanghuo E       | Prostaglandin G/H synthase 2                          | PTGS2    |
| MOL004386 | Yinyanghuo E       | Acetylcholinesterase                                  | ACHE     |
| MOL004386 | Yinyanghuo E       | DNA topoisomerase 2-alpha                             | TOP2A    |
| MOL004386 | Yinyanghuo E       | Dipeptidyl peptidase 4                                | DPP4     |
| MOL004386 | Yinyanghuo E       | cAMP-dependent protein kinase catalytic subunit alpha | PRKACA   |
| MOL004386 | Yinyanghuo E       | Trypsin-1                                             | PRSS1    |
| MOL004386 | Yinyanghuo E       | Nuclear receptor coactivator 2                        | NCOA2    |
| MOL004388 | ioxo-2,3,4,8-tetra | Prostaglandin G/H synthase 1                          | PTGS1    |
| MOL004388 | ioxo-2,3,4,8-tetra | Coagulation factor X                                  | F10      |
| MOL004388 | ioxo-2,3,4,8-tetra | Prostaglandin G/H synthase 2                          | PTGS2    |
| MOL004388 | ioxo-2,3,4,8-tetra | DNA topoisomerase 2-alpha                             | TOP2A    |
| MOL004388 | ioxo-2,3,4,8-tetra | Heat shock protein HSP 90-alpha                       | HSP90AA1 |
| MOL004391 | ut-2-enyl)-2-pher  | Nitric oxide synthase, inducible                      | NOS2     |
| MOL004391 | ut-2-enyl)-2-pher  | Prostaglandin G/H synthase 1                          | PTGS1    |
| MOL004391 | ut-2-enyl)-2-pher  | Muscarinic acetylcholine receptor                     | CHRM3    |
| MOL004391 | ut-2-enyl)-2-pher  | Prothrombin                                           | F2       |
| MOL004391 | ut-2-enyl)-2-pher  | Muscarinic acetylcholine receptor                     | CHRM1    |
| MOL004391 | ut-2-enyl)-2-pher  | Estrogen receptor                                     | ESR1     |
| MOL004391 | ut-2-enyl)-2-pher  | Androgen receptor                                     | AR       |
| MOL004391 | ut-2-enyl)-2-pher  | Beta-1 adrenergic receptor                            | ADRB1    |
| MOL004391 | ut-2-enyl)-2-pher  | Sodium channel protein type 5 subunit alpha           | SCN5A    |
| MOL004391 | ut-2-enyl)-2-pher  | Peroxisome proliferator-activated receptor gamma      | PPARG    |
| MOL004391 | ut-2-enyl)-2-pher  | Prostaglandin G/H synthase 2                          | PTGS2    |
| MOL004391 | ut-2-enyl)-2-pher  | Retinoic acid receptor RXR-alpha                      | RXRA     |
| MOL004391 | ut-2-enyl)-2-pher  | Acetylcholinesterase                                  | ACHE     |
| MOL004391 | ut-2-enyl)-2-pher  | cGMP-inhibited 3',5'-cyclic phosphodiesterase A       | PDE3A    |
| MOL004391 | ut-2-enyl)-2-pher  | Alpha-1B adrenergic receptor                          | ADRA1B   |
| MOL004391 | ut-2-enyl)-2-pher  | Sodium-dependent dopamine transporter                 | SLC6A3   |
| MOL004391 | ut-2-enyl)-2-pher  | Beta-2 adrenergic receptor                            | ADRB2    |
| MOL004391 | ut-2-enyl)-2-pher  | Alpha-1D adrenergic receptor                          | ADRA1D   |
| MOL004391 | ut-2-enyl)-2-pher  | Sodium-dependent serotonin transporter                | SLC6A4   |
| MOL004391 | ut-2-enyl)-2-pher  | Estrogen receptor beta                                | ESR2     |

|           |                   |                                     |          |
|-----------|-------------------|-------------------------------------|----------|
| MOL004391 | ut-2-enyl)-2-pher | Dipeptidyl peptidase 4              | DPP4     |
| MOL004391 | ut-2-enyl)-2-pher | Mitogen-activated protein kinase 14 | MAPK14   |
| MOL004391 | ut-2-enyl)-2-pher | Glycogen synthase kinase-3 beta     | GSK3B    |
| MOL004391 | ut-2-enyl)-2-pher | Heat shock protein HSP 90-alpha     | HSP90AA1 |
| MOL004391 | ut-2-enyl)-2-pher | Serine/threonine-protein kinase     | CHEK1    |
| MOL004391 | ut-2-enyl)-2-pher | Cyclin-A2                           | CCNA2    |
| MOL004394 | itin-3-O-alpha-L  | DNA topoisomerase 2-alpha           | TOP2A    |
| MOL004396 | -3-methoxyphenyl  | Estrogen receptor                   | ESR1     |
|           |                   | Sodium channel protein type 5       |          |
| MOL004396 | -3-methoxyphenyl  | subunit alpha                       | SCN5A    |
| MOL004396 | -3-methoxyphenyl  | Prostaglandin G/H synthase 2        | PTGS2    |
| MOL004396 | -3-methoxyphenyl  | Alpha-1B adrenergic receptor        | ADRA1B   |
| MOL004396 | -3-methoxyphenyl  | Beta-2 adrenergic receptor          | ADRB2    |
| MOL004396 | -3-methoxyphenyl  | Heat shock protein HSP 90-alpha     | HSP90AA1 |
| MOL004396 | -3-methoxyphenyl  | Cyclin-A2                           | CCNA2    |
| MOL004396 | -3-methoxyphenyl  | Nuclear receptor coactivator 2      | NCOA2    |
| MOL004425 | Icariin           | DNA topoisomerase 2-alpha           | TOP2A    |
| MOL004427 | Icariside A7      | Prostaglandin G/H synthase 2        | PTGS2    |
| MOL004427 | Icariside A7      | DNA topoisomerase 2-alpha           | TOP2A    |
| MOL004427 | Icariside A7      | Nuclear receptor coactivator 2      | NCOA2    |
| MOL000006 | luteolin          | Prostaglandin G/H synthase 1        | PTGS1    |
| MOL000006 | luteolin          | Androgen receptor                   | AR       |
| MOL000006 | luteolin          | Prostaglandin G/H synthase 2        | PTGS2    |
| MOL000006 | luteolin          | Heat shock protein HSP 90-alpha     | HSP90AA1 |
| MOL000006 | luteolin          | Trypsin-1                           | PRSS1    |
| MOL000006 | luteolin          | Nuclear receptor coactivator 2      | NCOA2    |
|           |                   | cAMP-dependent protein kinase       |          |
| MOL000006 | luteolin          | catalytic subunit alpha             | PRKACA   |
| MOL000006 | luteolin          | Dipeptidyl peptidase 4              | DPP4     |
| MOL000006 | luteolin          | Transcription factor p65            | RELA     |
| MOL000006 | luteolin          | Epidermal growth factor receptor    | EGFR     |
|           |                   | RAC-alpha serine/threonine-protein  |          |
| MOL000006 | luteolin          | kinase                              | AKT1     |
| MOL000006 | luteolin          | G1/S-specific cyclin-D1             | CCND1    |
| MOL000006 | luteolin          | Bcl-2-like protein 1                | BCL2L1   |
| MOL000006 | luteolin          | Cyclin-dependent kinase inhibitor 1 | CDKN1A   |
| MOL000006 | luteolin          | Caspase-9                           | CASP9    |
| MOL000006 | luteolin          | 72 kDa type IV collagenase          | MMP2     |
| MOL000006 | luteolin          | Matrix metalloproteinase-9          | MMP9     |
| MOL000006 | luteolin          | Mitogen-activated protein kinase 1  | MAPK1    |
| MOL000006 | luteolin          | Interleukin-10                      | IL10     |
| MOL000006 | luteolin          | Retinoblastoma-associated protein   | RB1      |
| MOL000006 | luteolin          | Tumor necrosis factor               | TNFSF15  |
| MOL000006 | luteolin          | Transcription factor AP-1           | JUN      |
| MOL000006 | luteolin          | Interleukin-6                       | IL6      |
| MOL000006 | luteolin          | Caspase-3                           | CASP3    |
| MOL000006 | luteolin          | Cellular tumor antigen p53          | TP63     |
| MOL000006 | luteolin          | NF-kappa-B inhibitor alpha          | NFKBIA   |
| MOL000006 | luteolin          | DNA topoisomerase 1                 | TOP1     |
| MOL000006 | luteolin          | E3 ubiquitin-protein ligase Mdm2    | MDM2     |
| MOL000006 | luteolin          | Amyloid beta A4 protein             | APP      |
| MOL000006 | luteolin          | Interstitial collagenase            | MMP1     |
| MOL000006 | luteolin          | Proliferating cell nuclear antigen  | PCNA     |
|           |                   | Receptor tyrosine-protein kinase    |          |
| MOL000006 | luteolin          | erbB-2                              | ERBB2    |
|           |                   | Peroxisome proliferator-activated   |          |
| MOL000006 | luteolin          | receptor gamma                      | PPARG    |
| MOL000006 | luteolin          | Heme oxygenase 1                    | HMOX1    |
| MOL000006 | luteolin          | Caspase-7                           | CASP7    |



|           |                  |                                                                          |          |
|-----------|------------------|--------------------------------------------------------------------------|----------|
| MOL000006 | luteolin         | Intercellular adhesion molecule 1<br>Induced myeloid leukemia cell       | ICAM1    |
| MOL000006 | luteolin         | differentiation protein Mcl-1<br>Baculoviral IAP repeat-containing       | MCL1     |
| MOL000006 | luteolin         | protein 5                                                                | BIRC5    |
| MOL000006 | luteolin         | Interleukin-2                                                            | IL2      |
| MOL000006 | luteolin         | G2/mitotic-specific cyclin-B1                                            | CCNB1    |
| MOL000006 | luteolin         | Tyrosinase                                                               | TYR      |
| MOL000006 | luteolin         | Interferon gamma                                                         | IFNG     |
| MOL000006 | luteolin         | Interleukin-4                                                            | IL4      |
| MOL000006 | luteolin         | DNA topoisomerase 2-alpha<br>Solute carrier family 2, facilitated        | TOP2A    |
| MOL000006 | luteolin         | glucose transporter member 4                                             | SLC2A4   |
| MOL000006 | luteolin         | Insulin receptor                                                         | INSR     |
| MOL000006 | luteolin         | CD40 ligand                                                              | CD40LG   |
| MOL000006 | luteolin         | Prostaglandin E synthase                                                 | PTGES    |
| MOL000006 | luteolin         | Kinetochore protein Nuf2                                                 | NUF2     |
| MOL000006 | luteolin         | Adenylate cyclase type 2                                                 | ADCY2    |
| MOL000006 | luteolin         | Hepatocyte growth factor receptor                                        | MET      |
| MOL000622 | Magnograndiolide | Glutamate receptor 2                                                     | GRIA2    |
| MOL000098 | quercetin        | Prostaglandin G/H synthase 1                                             | PTGS1    |
| MOL000098 | quercetin        | Androgen receptor                                                        | AR       |
| MOL000098 | quercetin        | Peroxisome proliferator-activated<br>receptor gamma                      | PPARG    |
| MOL000098 | quercetin        | Prostaglandin G/H synthase 2                                             | PTGS2    |
| MOL000098 | quercetin        | Heat shock protein HSP 90-alpha                                          | HSP90AA1 |
| MOL000098 | quercetin        | Nuclear receptor coactivator 2                                           | NCOA2    |
| MOL000098 | quercetin        | Dipeptidyl peptidase 4                                                   | DPP4     |
| MOL000098 | quercetin        | Aldose reductase                                                         | AKR1B1   |
| MOL000098 | quercetin        | Trypsin-1                                                                | PRSS1    |
| MOL000098 | quercetin        | DNA topoisomerase 2-alpha                                                | TOP2A    |
| MOL000098 | quercetin        | Prothrombin                                                              | F2       |
| MOL000098 | quercetin        | Potassium voltage-gated channel<br>subfamily H member 2                  | KCNH2    |
| MOL000098 | quercetin        | Sodium channel protein type 5<br>subunit alpha                           | SCN5A    |
| MOL000098 | quercetin        | Coagulation factor X                                                     | F10      |
| MOL000098 | quercetin        | Beta-2 adrenergic receptor                                               | ADRB2    |
| MOL000098 | quercetin        | Stromelysin-1                                                            | MMP3     |
| MOL000098 | quercetin        | cAMP-dependent protein kinase<br>catalytic subunit alpha                 | PRKACA   |
| MOL000098 | quercetin        | Coagulation factor VII                                                   | F7       |
| MOL000098 | quercetin        | Retinoic acid receptor RXR-alpha                                         | RXRA     |
| MOL000098 | quercetin        | Acetylcholinesterase                                                     | ACHE     |
| MOL000098 | quercetin        | Amine oxidase [flavin-containing]                                        | MAOB     |
| MOL000098 | quercetin        | Transcription factor p65                                                 | RELA     |
| MOL000098 | quercetin        | Epidermal growth factor receptor<br>RAC-alpha serine/threonine-protein   | EGFR     |
| MOL000098 | quercetin        | kinase                                                                   | AKT1     |
| MOL000098 | quercetin        | G1/S-specific cyclin-D1                                                  | CCND1    |
| MOL000098 | quercetin        | Apoptosis regulator Bcl-2                                                | BCL2     |
| MOL000098 | quercetin        | Bcl-2-like protein 1                                                     | BCL2L1   |
| MOL000098 | quercetin        | Proto-oncogene c-Fos                                                     | FOS      |
| MOL000098 | quercetin        | Cyclin-dependent kinase inhibitor 1<br>Eukaryotic translation initiation | CDKN1A   |
| MOL000098 | quercetin        | factor 6                                                                 | EIF6     |
| MOL000098 | quercetin        | Apoptosis regulator BAX                                                  | BAX      |
| MOL000098 | quercetin        | Caspase-9                                                                | CASP9    |
| MOL000098 | quercetin        | Urokinase-type plasminogen                                               | PLAU     |
| MOL000098 | quercetin        | 72 kDa type IV collagenase                                               | MMP2     |

|           |           |                                                               |          |
|-----------|-----------|---------------------------------------------------------------|----------|
| MOL000098 | quercetin | Matrix metalloproteinase-9                                    | MMP9     |
| MOL000098 | quercetin | Mitogen-activated protein kinase 1                            | MAPK1    |
| MOL000098 | quercetin | Interleukin-10                                                | IL10     |
| MOL000098 | quercetin | Retinoblastoma-associated protein                             | RB1      |
| MOL000098 | quercetin | Tumor necrosis factor                                         | TNFSF15  |
| MOL000098 | quercetin | Transcription factor AP-1                                     | JUN      |
| MOL000098 | quercetin | Interleukin-6                                                 | IL6      |
| MOL000098 | quercetin | Activator of 90 kDa heat shock protein ATPase homolog 1       | AHSA1    |
| MOL000098 | quercetin | Caspase-3                                                     | CASP3    |
| MOL000098 | quercetin | Cellular tumor antigen p53                                    | TP63     |
| MOL000098 | quercetin | ETS domain-containing protein Elk-                            | ELK1     |
| MOL000098 | quercetin | NF-kappa-B inhibitor alpha                                    | NFKBIA   |
| MOL000098 | quercetin | Ornithine decarboxylase                                       | ODC1     |
| MOL000098 | quercetin | Caspase-8                                                     | CASP8    |
| MOL000098 | quercetin | DNA topoisomerase 1                                           | TOP1     |
| MOL000098 | quercetin | RAF proto-oncogene                                            | RAF1     |
| MOL000098 | quercetin | serine/threonine-protein kinase                               | RAF1     |
| MOL000098 | quercetin | Superoxide dismutase [Cu-Zn]                                  | SOD1     |
| MOL000098 | quercetin | Protein kinase C alpha type                                   | PRKCA    |
| MOL000098 | quercetin | Interstitial collagenase                                      | MMP1     |
| MOL000098 | quercetin | Hypoxia-inducible factor 1-alpha                              | HIF1A    |
| MOL000098 | quercetin | Signal transducer and activator of transcription 1-alpha/beta | STAT1    |
| MOL000098 | quercetin | Protein CBFA2T1                                               | RUNX1T1  |
| MOL000098 | quercetin | Receptor tyrosine-protein kinase erbB-2                       | ERBB2    |
| MOL000098 | quercetin | Peroxisome proliferator-activated receptor gamma              | PPARG    |
| MOL000098 | quercetin | Acetyl-CoA carboxylase 1                                      | ACACA    |
| MOL000098 | quercetin | Heme oxygenase 1                                              | HMOX1    |
| MOL000098 | quercetin | Cytochrome P450 3A4                                           | CYP3A4   |
| MOL000098 | quercetin | Caveolin-1                                                    | CAV1     |
| MOL000098 | quercetin | Myc proto-oncogene protein                                    | MYC      |
| MOL000098 | quercetin | Tissue factor                                                 | F3       |
| MOL000098 | quercetin | Gap junction alpha-1 protein                                  | GJA1     |
| MOL000098 | quercetin | Cytochrome P450 1A1                                           | CYP1A1   |
| MOL000098 | quercetin | Intercellular adhesion molecule 1                             | ICAM1    |
| MOL000098 | quercetin | Interleukin-1 beta                                            | IL1B     |
| MOL000098 | quercetin | E-selectin                                                    | SELE     |
| MOL000098 | quercetin | Vascular cell adhesion protein 1                              | VCAM1    |
| MOL000098 | quercetin | Interleukin-8                                                 | CXCL8    |
| MOL000098 | quercetin | Protein kinase C beta type                                    | PRKCB    |
| MOL000098 | quercetin | Baculoviral IAP repeat-containing protein 5                   | BIRC5    |
| MOL000098 | quercetin | Dual oxidase 2                                                | DUOX2    |
| MOL000098 | quercetin | Nitric oxide synthase, endothelial                            | NOS3     |
| MOL000098 | quercetin | Heat shock protein beta-1                                     | HSPB1    |
| MOL000098 | quercetin | Maltase-glucoamylase, intestinal                              | MGAM     |
| MOL000098 | quercetin | Interleukin-2                                                 | IL2      |
| MOL000098 | quercetin | Nuclear receptor subfamily 1 group I member 2                 | NR1I2    |
| MOL000098 | quercetin | Cytochrome P450 1B1                                           | CYP1B1   |
| MOL000098 | quercetin | G2/mitotic-specific cyclin-B1                                 | CCNB1    |
| MOL000098 | quercetin | Tissue-type plasminogen activator                             | PLAT     |
| MOL000098 | quercetin | Thrombomodulin                                                | THBD     |
| MOL000098 | quercetin | Plasminogen activator inhibitor 1                             | SERPINE1 |
| MOL000098 | quercetin | Interferon gamma                                              | IFNG     |
| MOL000098 | quercetin | Arachidonate 5-lipoxygenase                                   | ALOX5    |

|           |             |                                                                                         |        |
|-----------|-------------|-----------------------------------------------------------------------------------------|--------|
| MOL000098 | quercetin   | Interleukin-1 alpha                                                                     | IL1A   |
| MOL000098 | quercetin   | Myeloperoxidase                                                                         | MPO    |
| MOL000098 | quercetin   | DNA topoisomerase 2-alpha                                                               | TOP2A  |
| MOL000098 | quercetin   | Neutrophil cytosol factor 1<br>ATP-binding cassette sub-family G<br>member 2            | NCF1   |
| MOL000098 | quercetin   |                                                                                         | ABCG2  |
| MOL000098 | quercetin   | Hyaluronan synthase 2                                                                   | HAS2   |
| MOL000098 | quercetin   | Nuclear factor erythroid 2-related<br>factor 2                                          | NFE2L2 |
| MOL000098 | quercetin   | NAD(P)H dehydrogenase [quinone]                                                         | NQO1   |
| MOL000098 | quercetin   | Poly [ADP-ribose] polymerase 1                                                          | PARP1  |
| MOL000098 | quercetin   | Aryl hydrocarbon receptor<br>26S proteasome non-ATPase<br>regulatory subunit 3          | AHR    |
| MOL000098 | quercetin   |                                                                                         | PSMD3  |
| MOL000098 | quercetin   | Solute carrier family 2, facilitated<br>glucose transporter member 4                    | SLC2A4 |
| MOL000098 | quercetin   | Collagen alpha-1(III) chain                                                             | COL3A1 |
| MOL000098 | quercetin   | C-X-C motif chemokine 11                                                                | CXCL11 |
| MOL000098 | quercetin   | C-X-C motif chemokine 2                                                                 | CXCL2  |
| MOL000098 | quercetin   | DDB1- and CUL4-associated factor<br>Nuclear receptor subfamily 1 group<br>I member 3    | DCAF5  |
| MOL000098 | quercetin   |                                                                                         | NR1I3  |
| MOL000098 | quercetin   | Serine/threonine-protein kinase                                                         | CHEK2  |
| MOL000098 | quercetin   | Insulin receptor                                                                        | INSR   |
| MOL000098 | quercetin   | Claudin-4                                                                               | CLDN4  |
| MOL000098 | quercetin   | Peroxisome proliferator-activated<br>receptor alpha                                     | PPARA  |
| MOL000098 | quercetin   | Peroxisome proliferator-activated<br>receptor delta                                     | PPARD  |
| MOL000098 | quercetin   | Heat shock factor protein 1                                                             | HSF1   |
| MOL000098 | quercetin   | C-reactive protein                                                                      | CRP    |
| MOL000098 | quercetin   | C-X-C motif chemokine 10<br>Inhibitor of nuclear factor kappa-B<br>kinase subunit alpha | CXCL10 |
| MOL000098 | quercetin   |                                                                                         | CHUK   |
| MOL000098 | quercetin   | Osteopontin                                                                             | SPP1   |
| MOL000098 | quercetin   | Runt-related transcription factor 2<br>Ras association domain-containing<br>protein 1   | RUNX2  |
| MOL000098 | quercetin   |                                                                                         | RASSF1 |
| MOL000098 | quercetin   | Transcription factor E2F1                                                               | E2F1   |
| MOL000098 | quercetin   | Transcription factor E2F2                                                               | E2F2   |
| MOL000098 | quercetin   | Prostatic acid phosphatase                                                              | ACPP   |
| MOL000098 | quercetin   | Cathepsin D                                                                             | CTSD   |
| MOL000098 | quercetin   | Insulin-like growth factor-binding<br>protein 3                                         | IGFBP3 |
| MOL000098 | quercetin   | Insulin-like growth factor II                                                           | IGF2   |
| MOL000098 | quercetin   | CD40 ligand                                                                             | CD40LG |
| MOL000098 | quercetin   | Interferon regulatory factor 1<br>Receptor tyrosine-protein kinase<br>erbB-3            | IRF1   |
| MOL000098 | quercetin   |                                                                                         | ERBB3  |
| MOL000098 | quercetin   | Serum paraoxonase/arylesterase 1                                                        | PON1   |
| MOL000098 | quercetin   | Type I iodothyronine deiodinase<br>Procollagen C-endopeptidase<br>enhancer 1            | DIO1   |
| MOL000098 | quercetin   |                                                                                         | PCOLCE |
| MOL000098 | quercetin   | Puromycin-sensitive<br>Hexokinase-2                                                     | NPEPPS |
| MOL000098 | quercetin   |                                                                                         | HK2    |
| MOL000098 | quercetin   | Ras GTPase-activating protein 1                                                         | RASA1  |
| MOL000098 | quercetin   | Glutathione S-transferase Mu 1                                                          | GSTM1  |
| MOL000098 | quercetin   | Glutathione S-transferase Mu 2                                                          | GSTM2  |
| MOL001525 | Daucosterol | Progesterone receptor                                                                   | PGR    |
| MOL001525 | Daucosterol | Nuclear receptor coactivator 2                                                          | NCOA2  |

|           |                   |                                                                                                                          |                        |
|-----------|-------------------|--------------------------------------------------------------------------------------------------------------------------|------------------------|
| MOL002268 | Rhein             | Prostaglandin G/H synthase 1                                                                                             | PTGS1                  |
| MOL002268 | Rhein             | Prostaglandin G/H synthase 2                                                                                             | PTGS2                  |
| MOL002268 | Rhein             | Heat shock protein HSP 90-alpha<br>Phosphatidylinositol 4,5-<br>bisphosphate 3-kinase catalytic<br>subunit gamma isoform | HSP90AA1<br><br>PIK3CG |
| MOL002268 | Rhein             | Nuclear receptor coactivator 6                                                                                           | NCOA6                  |
| MOL002268 | Rhein             | Aldo-keto reductase family 1<br>member B10                                                                               | AKR1B10                |
| MOL002268 | Rhein             | Transcription factor AP-1                                                                                                | JUN                    |
| MOL002268 | Rhein             | Folypolyglutamate synthase                                                                                               | FPGS                   |
| MOL002268 | Rhein             | Thymidylate synthase                                                                                                     | TYMS                   |
| MOL002268 | Rhein             | Interleukin-13                                                                                                           | IL13                   |
| MOL002268 | Rhein             | Peroxisome proliferator-activated<br>receptor gamma                                                                      | PPARG                  |
| MOL002268 | Rhein             | Thrombopoietin receptor                                                                                                  | MPL                    |
| MOL002268 | Rhein             | Interleukin-1 beta                                                                                                       | IL1B                   |
| MOL002268 | Rhein             | Prostaglandin G/H synthase 1                                                                                             | PTGS1                  |
| MOL002268 | Rhein             | Apolipoprotein A-II                                                                                                      | APOA2                  |
| MOL002268 | Rhein             | Gamma-glutamyl hydrolase                                                                                                 | GGH                    |
| MOL002268 | Rhein             | Prostaglandin G/H synthase 2                                                                                             | PTGS2                  |
| MOL002268 | Rhein             | Serine hydroxymethyltransferase                                                                                          | SHMT1                  |
| MOL002268 | Rhein             | Serpin B7                                                                                                                | SERPINB7               |
| MOL002268 | Rhein             | Arachidonate 5-lipoxygenase                                                                                              | ALOX5                  |
| MOL002268 | Rhein             | Plasminogen activator inhibitor 1                                                                                        | SERPINE1               |
| MOL008647 | rans-Feruloyltyra | Melatonin receptor type 1A                                                                                               | MTNR1A                 |
| MOL008647 | rans-Feruloyltyra | Melatonin receptor type 1B                                                                                               | MTNR1B                 |
| MOL008647 | rans-Feruloyltyra | 5-hydroxytryptamine receptor 2C                                                                                          | HTR2C                  |

Supplementary Table 3

| Public Database | Target Genes |
|-----------------|--------------|
| TTD             | FGFR1        |
| TTD             | AChE         |
| TTD             | FGFR2        |
| TTD             | FLT-3        |
| TTD             | INSR         |
| TTD             | MAO-A        |
| TTD             | TrkA         |
| TTD             | KIT          |
| TTD             | KDR          |
| TTD             | AGTR1        |
| TTD             | ESR2         |
| TTD             | HPGDS        |
| TTD             | HSP90A       |
| TTD             | H1R          |
| TTD             | MC4R         |
| TTD             | MTNR1A       |
| TTD             | MAO-B        |
| TTD             | CHRM3        |
| TTD             | TrkC         |
| TTD             | OPRS1        |
| TTD             | PPAR-gamma   |
| TTD             | PLG          |
| TTD             | PDGFRB       |
| TTD             | COX-1        |
| TTD             | PRKCE        |
| TTD             | MET          |
| TTD             | VEGFR1 mRNA  |
| TTD             | HTR1A        |
| TTD             | HTR1B        |
| TTD             | HTR2A        |
| TTD             | HTR2C        |
| TTD             | HTR4         |
| TTD             | ADORA2A      |
| TTD             | APP          |
| TTD             | TrkB         |
| TTD             | BCHE         |
| TTD             | D2R          |
| TTD             | D3R          |
| TTD             | D4R          |
| TTD             | GABRA5       |
| TTD             | NMDAR1       |
| TTD             | NMDAR2A      |
| TTD             | NMDAR2B      |
| TTD             | IL1B         |
| TTD             | NGFR         |
| TTD             | MAPK12       |
| TTD             | CHRM1        |
| TTD             | CHRM2        |
| TTD             | CHRNA4       |
| TTD             | PDE4D        |
| TTD             | SERT         |
| TTD             | TSPO         |
| TTD             | HTR1D        |
| TTD             | ADORA2B      |
| TTD             | ADORA2C      |

|     |           |
|-----|-----------|
| TTD | GRIA1     |
| TTD | LEPR      |
| TTD | CHRNA7    |
| TTD | PTGFR     |
| TTD | COX-2     |
| TTD | RARB      |
| TTD | SSTR1     |
| TTD | SSTR2     |
| TTD | SSTR3     |
| TTD | SSTR5     |
| TTD | SLC18A2   |
| TTD | CACNA1C   |
| TTD | TOP2      |
| TTD | GABRG3    |
| TTD | CHRM5     |
| TTD | CHRNA4/B2 |
| TTD | FGFR3     |
| TTD | GSK-3B    |
| TTD | HSD11B1   |
| TTD | IKKB      |
| TTD | PLA2G7    |
| TTD | PTGES     |
| TTD | RARA      |
| TTD | p38 alpha |
| TTD | p38 beta  |
| TTD | FLT-4     |
| TTD | HTR6      |
| TTD | ANGPT1    |
| TTD | ANGPT2    |
| TTD | CCR2      |
| TTD | CAPN2     |
| TTD | CTSL      |
| TTD | F11 mRNA  |
| TTD | FA12 mRNA |
| TTD | H3R       |
| TTD | RON       |
| TTD | mGluR2    |
| TTD | mGluR3    |
| TTD | mGluR5    |
| TTD | CHRNB2    |
| TTD | CHRNB4    |
| TTD | PPARD     |
| TTD | PDE9      |
| TTD | MERTK     |
| TTD | HTR7      |
| TTD | AGER      |
| TTD | BACE1     |
| TTD | BRD4      |
| TTD | CSF1R     |
| TTD | NGF       |
| TTD | P2RX7     |
| TTD | P2RY6     |
| TTD | SSTR4     |
| TTD | SNCA      |
| TTD | OX40      |
| TTD | TRPV6     |
| TTD | CACNA1D   |
| TTD | GS        |

|      |           |
|------|-----------|
| TTD  | MAPT      |
| TTD  | MycB pssA |
| TTD  | RIPK1     |
| TTD  | KCNN4     |
| TTD  | FLNA      |
| TTD  | PAI       |
| TTD  | TMEM97    |
| TTD  | TARDBP    |
| TTD  | CTSB      |
| TTD  | APH-1     |
| TTD  | mGluR1    |
| TTD  | RAC1      |
| TTD  | APP mRNA  |
| TTD  | FPR2      |
| TTD  | FPR3      |
| TTD  | nAChR     |
| TTD  | GRIA      |
| TTD  | KCN       |
| TTD  | CaC       |
| TTD  | CHRM      |
| TTD  | NMDAR     |
| TTD  | OPR       |
| TTD  | MAO       |
| TTD  | DNA synth |
| TTD  | PRO       |
| TTD  | SNDR      |
| TTD  | BACE      |
| TTD  | NCAM      |
| TTD  | CRF       |
| TTD  | LPO       |
| TTD  | MP        |
| TTD  | SSTR      |
| TTD  | TauA      |
| TTD  | GPCR      |
| TTD  | MicroTu   |
| OMIM | AD        |
| OMIM | AD2       |
| OMIM | AD17      |
| OMIM | AD9       |
| OMIM | AD19      |
| OMIM | AD18      |
| OMIM | AD15      |
| OMIM | DLB       |
| OMIM | APP       |
| OMIM | SNCA      |
| OMIM | AD13      |
| OMIM | AD14      |
| OMIM | NOS3      |
| OMIM | AD16      |
| OMIM | COL25A1   |
| OMIM | NPC1      |
| OMIM | GSD       |
| OMIM | PD        |
| OMIM | FTD       |
| OMIM | IBMPFD1   |
| OMIM | BPTF      |
| OMIM | HD        |
| OMIM | PARK8     |







|          |           |
|----------|-----------|
| OMIM     | CNTF      |
| OMIM     | NOTCH2NLC |
| OMIM     | NM        |
| OMIM     | CFH       |
| OMIM     | PSENFEN   |
| OMIM     | SCZD      |
| OMIM     | MSA1      |
| OMIM     | SLC10A4   |
| OMIM     | LILRB2    |
| OMIM     | BDNF      |
| OMIM     | ATXN8OS   |
| OMIM     | HLA-A     |
| OMIM     | NOS2      |
| OMIM     | HMOX1     |
| OMIM     | PRND      |
| OMIM     | COMT      |
| OMIM     | FGA       |
| OMIM     | SLC6A4    |
| OMIM     | CMD1V     |
| OMIM     | ECE1      |
| OMIM     | CHRNA7    |
| OMIM     | TRPM7     |
| OMIM     | VLDLR     |
| OMIM     | MIR29A    |
| OMIM     | MIR29B1   |
| OMIM     | RELN      |
| OMIM     | ESR2      |
| OMIM     | CHAT      |
| OMIM     | CTSB      |
| OMIM     | NTRK1     |
| OMIM     | DNM1L     |
| OMIM     | HDAC2     |
| OMIM     | FTDALS8   |
| DrugBank | PKD2L1    |
| DrugBank | PKD1L3    |
| DrugBank | IGHG1     |
| DrugBank | IGHG2     |
| DrugBank | IGHG4     |
| DrugBank | IGHG3     |
| DrugBank | ATP7B     |
| DrugBank | HTT       |
| DrugBank | PARK7     |
| DrugBank | ATP7A     |
| DrugBank | APP       |
| DrugBank | CTSD      |
| DrugBank | MMP19     |
| DrugBank | CYBB      |
| DrugBank | CYBA      |
| DrugBank | NCF1      |
| DrugBank | NCF2      |
| DrugBank | NCF4      |
| DrugBank | RAC1      |
| DrugBank | RAC2      |
| DrugBank | ADAMTS4   |
| DrugBank | HSD17B10  |
| DrugBank | NPEPPS    |
| DrugBank | HIF1A     |
| DrugBank | KLK6      |

|          |         |
|----------|---------|
| DrugBank | ANPEP   |
| DrugBank | ITGB7   |
| DrugBank | LRRK2   |
| DrugBank | GSK3A   |
| DrugBank | GSK3B   |
| DrugBank | TBK1    |
| DrugBank | CASP4   |
| DrugBank | NR1D1   |
| PHA      | CLCN5   |
| PHA      | PKD1    |
| PHA      | PRNP    |
| PHA      | PKD2    |
| PHA      | GLRA1   |
| PHA      | AR      |
| PHA      | TGFB1   |
| PHA      | CLCN1   |
| PHA      | NDP     |
| PHA      | PKHD1   |
| PHA      | MRE11   |
| PHA      | EPM2A   |
| PHA      | ABCA1   |
| PHA      | ATP7B   |
| PHA      | PLP1    |
| PHA      | PHYH    |
| PHA      | LIPA    |
| PHA      | ABCA4   |
| PHA      | NCF1    |
| PHA      | NCF2    |
| PHA      | BCKDHB  |
| PHA      | PYGM    |
| PHA      | NF1     |
| PHA      | NPC1    |
| PHA      | BCKDHA  |
| PHA      | HEXA    |
| PHA      | AGL     |
| PHA      | PKD1P1  |
| PHA      | PYGL    |
| PHA      | PKD1L1  |
| PHA      | NAGLU   |
| PHA      | G6PC    |
| PHA      | PKDREJ  |
| PHA      | PKD2L2  |
| PHA      | PKD1L2  |
| PHA      | GNS     |
| PHA      | ASPA    |
| PHA      | F9      |
| PHA      | SLC6A19 |
| PHA      | GALC    |
| PHA      | PKD1L3  |
| PHA      | PKD2L1  |
| PHA      | PEX7    |
| PHA      | ABCG8   |
| PHA      | PSAP    |
| PHA      | NPC2    |
| PHA      | BEST1   |
| PHA      | RMD1    |
| PHA      | CELIAC2 |
| PHA      | PARK10  |

|          |          |
|----------|----------|
| PHA      | PKD3     |
| PHA      | KWE      |
| PHA      | MYP1     |
| PHA      | PARK3    |
| PHA      | CCAL1    |
| PHA      | PKD1P6   |
| PHA      | PKD1P5   |
| PHA      | PKD1P4   |
| PHA      | PKD1P3   |
| PHA      | PKD1P2   |
| PHA      | SLC2A4RG |
| PHA      | JCAD     |
| PHA      | SLC25A16 |
| PHA      | GATD1    |
| PHA      | GBE1     |
| PHA      | CCDC180  |
| PHA      | PKHD1L1  |
| PHA      | AD5      |
| PHA      | PSEN2    |
| PHA      | CTD      |
| PHA      | SH2D1A   |
| PHA      | OED      |
| PHA      | MYMY1    |
| PHA      | MYMY3    |
| PHA      | GAA      |
| PHA      | PDB4     |
| PHA      | PDB1     |
| PHA      | PDB5     |
| PHA      | PDB6     |
| PHA      | IBD3     |
| PHA      | IBD5     |
| PHA      | IBD2     |
| PHA      | IBD4     |
| PHA      | IBD6     |
| PHA      | IBD7     |
| PHA      | IBD9     |
| PHA      | IBD8     |
| GeneCard | PSEN1    |
| GeneCard | APP      |
| GeneCard | APOE     |
| GeneCard | PSEN2    |
| GeneCard | MAPT     |
| GeneCard | SNCA     |
| GeneCard | GBA      |
| GeneCard | HFE      |
| GeneCard | NOS3     |
| GeneCard | PKD1     |
| GeneCard | MT-ND1   |
| GeneCard | MPO      |
| GeneCard | NPC1     |
| GeneCard | PRNP     |
| GeneCard | LRRK2    |
| GeneCard | IL6      |
| GeneCard | TNF      |
| GeneCard | IL10     |
| GeneCard | GAA      |
| GeneCard | LMNA     |
| GeneCard | PRKN     |

|          |              |
|----------|--------------|
| GeneCard | A2M          |
| GeneCard | AD5          |
| GeneCard | PLAU         |
| GeneCard | MIR146A      |
| GeneCard | ABCA7        |
| GeneCard | SQSTM1       |
| GeneCard | NOD2         |
| GeneCard | MPZ          |
| GeneCard | LOC106627981 |
| GeneCard | VCP          |
| GeneCard | AD6          |
| GeneCard | SMPD1        |
| GeneCard | AD10         |
| GeneCard | TP53         |
| GeneCard | MIR34A       |
| GeneCard | TGFB1        |
| GeneCard | AD7          |
| GeneCard | MFN2         |
| GeneCard | NEFL         |
| GeneCard | ACE          |
| GeneCard | AD11         |
| GeneCard | AD8          |
| GeneCard | MIR29A       |
| GeneCard | AD17         |
| GeneCard | AD12         |
| GeneCard | AD13         |
| GeneCard | AD14         |
| GeneCard | AD16         |
| GeneCard | HFE-AS1      |
| GeneCard | ATP7B        |
| GeneCard | MIR29B1      |
| GeneCard | MIR106B      |
| GeneCard | VWF          |
| GeneCard | PARK7        |
| GeneCard | RET          |
| GeneCard | ABCA1        |
| GeneCard | IL1B         |
| GeneCard | SORL1        |
| GeneCard | TREM2        |
| GeneCard | CYBB         |
| GeneCard | ABCA4        |
| GeneCard | GDAP1        |
| GeneCard | ADAM10       |
| GeneCard | UNC5C        |
| GeneCard | MIR107       |
| GeneCard | PINK1        |
| GeneCard | MTHFR        |
| GeneCard | DYNC1H1      |
| GeneCard | GJB1         |
| GeneCard | DNM2         |
| GeneCard | MIR328       |
| GeneCard | HLA-DRB1     |
| GeneCard | BDNF         |
| GeneCard | PSAP         |
| GeneCard | PMP22        |
| GeneCard | GFAP         |
| GeneCard | RYR1         |
| GeneCard | AGL          |

|          |          |
|----------|----------|
| GeneCard | SOD1     |
| GeneCard | NPC2     |
| GeneCard | GDNF     |
| GeneCard | IFNG     |
| GeneCard | GBE1     |
| GeneCard | APBB1    |
| GeneCard | SERPINA3 |
| GeneCard | HTT      |
| GeneCard | GARS1    |
| GeneCard | MME      |
| GeneCard | MIR298   |
| GeneCard | TTR      |
| GeneCard | MT-ND2   |
| GeneCard | TARDBP   |
| GeneCard | HLA-DQB1 |
| GeneCard | INS      |
| GeneCard | G6PC1    |
| GeneCard | BACE1    |
| GeneCard | FIG4     |
| GeneCard | UCHL1    |
| GeneCard | PTEN     |
| GeneCard | FAS      |
| GeneCard | LRP5     |
| GeneCard | GRN      |
| GeneCard | APOA1    |
| GeneCard | CTNNB1   |
| GeneCard | SLC17A5  |
| GeneCard | PON1     |
| GeneCard | CTSD     |
| GeneCard | NAGLU    |
| GeneCard | EDNRB    |
| GeneCard | CFTR     |
| GeneCard | CRP      |
| GeneCard | HLA-B    |
| GeneCard | NOTCH1   |
| GeneCard | SNCB     |
| GeneCard | PPARG    |
| GeneCard | CHAT     |
| GeneCard | LRSAM1   |
| GeneCard | ADAM17   |
| GeneCard | SYNJ1    |
| GeneCard | EGR2     |
| GeneCard | TOMM40   |
| GeneCard | IL1A     |
| GeneCard | TLR4     |
| GeneCard | MT-ATP6  |
| GeneCard | LDLR     |
| GeneCard | AKT1     |
| GeneCard | ALB      |
| GeneCard | TNFRSF1A |
| GeneCard | CYBA     |
| GeneCard | NDRG1    |
| GeneCard | TLR2     |
| GeneCard | HSD17B10 |
| GeneCard | NCF2     |
| GeneCard | KIF1B    |
| GeneCard | HSPB1    |
| GeneCard | ACHE     |

|          |           |
|----------|-----------|
| GeneCard | LAMP2     |
| GeneCard | SERPINA1  |
| GeneCard | MAPK1     |
| GeneCard | IL4       |
| GeneCard | COMT      |
| GeneCard | SNCAIP    |
| GeneCard | TSC2      |
| GeneCard | GSK3B     |
| GeneCard | EGFR      |
| GeneCard | PLP1      |
| GeneCard | CCL2      |
| GeneCard | CLU       |
| GeneCard | MIR21     |
| GeneCard | LIPA      |
| GeneCard | C9orf72   |
| GeneCard | LRP1      |
| GeneCard | GANAB     |
| GeneCard | IL1RN     |
| GeneCard | SOX10     |
| GeneCard | PHYH      |
| GeneCard | FBN1      |
| GeneCard | VEGFA     |
| GeneCard | CLN3      |
| GeneCard | STAT3     |
| GeneCard | AR        |
| GeneCard | COL4A1    |
| GeneCard | ATXN2     |
| GeneCard | LITAF     |
| GeneCard | CAV3      |
| GeneCard | TNFRSF11A |
| GeneCard | MMP1      |
| GeneCard | IL2       |
| GeneCard | F2        |
| GeneCard | ESR1      |
| GeneCard | GATA1     |
| GeneCard | CASP3     |
| GeneCard | POLG      |
| GeneCard | DBT       |
| GeneCard | HMOX1     |
| GeneCard | PRKAG2    |
| GeneCard | VHL       |
| GeneCard | BCHE      |
| GeneCard | KRAS      |
| GeneCard | CST3      |
| GeneCard | LPL       |
| GeneCard | CFH       |
| GeneCard | GRIN2B    |
| GeneCard | REN       |
| GeneCard | ERBB2     |
| GeneCard | HEXB      |
| GeneCard | PIK3CA    |
| GeneCard | EDN3      |
| GeneCard | ABCB1     |
| GeneCard | NDP       |
| GeneCard | GALC      |
| GeneCard | CDK5      |
| GeneCard | APC       |
| GeneCard | JAK2      |

|          |           |
|----------|-----------|
| GeneCard | PSENE1    |
| GeneCard | OPTN      |
| GeneCard | ATXN3     |
| GeneCard | CXCL8     |
| GeneCard | PRKCSH    |
| GeneCard | HLA-DQA1  |
| GeneCard | BRAF      |
| GeneCard | SPTLC1    |
| GeneCard | TNFRSF11B |
| GeneCard | ASPA      |
| GeneCard | CASR      |
| GeneCard | NCF1      |
| GeneCard | BRCA1     |
| GeneCard | MT-CYB    |
| GeneCard | HRAS      |
| GeneCard | MIR132    |
| GeneCard | CP        |
| GeneCard | GATA3     |
| GeneCard | PHKA2     |
| GeneCard | MT-CO1    |
| GeneCard | NTRK1     |
| GeneCard | IL23R     |
| GeneCard | JUP       |
| GeneCard | MEFV      |
| GeneCard | MTOR      |
| GeneCard | MIR15A    |
| GeneCard | APOB      |
| GeneCard | PICALM    |
| GeneCard | PTGS2     |
| GeneCard | ACTA2     |
| GeneCard | ATP2A2    |
| GeneCard | TH        |
| GeneCard | JAG1      |
| GeneCard | TF        |
| GeneCard | CDKN2A    |
| GeneCard | NEFH      |
| GeneCard | MIR17     |
| GeneCard | HSPB8     |
| GeneCard | RAB7A     |
| GeneCard | MMP9      |
| GeneCard | PTPN11    |
| GeneCard | CASP8     |
| GeneCard | AGT       |
| GeneCard | CR1       |
| GeneCard | NOS2      |
| GeneCard | DYRK1A    |
| GeneCard | NF1       |
| GeneCard | PON2      |
| GeneCard | LEP       |
| GeneCard | MT-ND6    |
| GeneCard | NFKB1     |
| GeneCard | COL1A1    |
| GeneCard | NCSTN     |
| GeneCard | NR4A2     |
| GeneCard | PLA2G6    |
| GeneCard | CCR6      |
| GeneCard | HTR2A     |
| GeneCard | DSP       |



|          |          |
|----------|----------|
| GeneCard | MT-ND3   |
| GeneCard | TTN      |
| GeneCard | GAPDH    |
| GeneCard | PYGL     |
| GeneCard | SMAD4    |
| GeneCard | TBP      |
| GeneCard | CD40     |
| GeneCard | NCF4     |
| GeneCard | NGF      |
| GeneCard | VPS13C   |
| GeneCard | FUS      |
| GeneCard | ICAM1    |
| GeneCard | SAG      |
| GeneCard | PRPH2    |
| GeneCard | AGER     |
| GeneCard | ATM      |
| GeneCard | MIR155   |
| GeneCard | GRIN2A   |
| GeneCard | INSR     |
| GeneCard | SMN1     |
| GeneCard | GYS1     |
| GeneCard | EPM2A    |
| GeneCard | MMP3     |
| GeneCard | MAP2K1   |
| GeneCard | ATP7A    |
| GeneCard | IDE      |
| GeneCard | VPS35    |
| GeneCard | YARS1    |
| GeneCard | MIR210   |
| GeneCard | TBK1     |
| GeneCard | PPARGC1A |
| GeneCard | COL4A4   |
| GeneCard | CCR5     |
| GeneCard | ERBB4    |
| GeneCard | HLA-A    |
| GeneCard | AGTR1    |
| GeneCard | IL18     |
| GeneCard | G6PD     |
| GeneCard | MECP2    |
| GeneCard | GRIN1    |
| GeneCard | MKS1     |
| GeneCard | TPP1     |
| GeneCard | SLC6A4   |
| GeneCard | HNRNPA1  |
| GeneCard | IL17A    |
| GeneCard | FCGR2A   |
| GeneCard | COL4A5   |
| GeneCard | SERPINE1 |
| GeneCard | CYP27A1  |
| GeneCard | IGF1     |
| GeneCard | LRP6     |
| GeneCard | MT-ND5   |
| GeneCard | ATP13A2  |
| GeneCard | PARK16   |
| GeneCard | BPTF     |
| GeneCard | BEST1    |
| GeneCard | TGFBR2   |
| GeneCard | RAF1     |

|          |           |
|----------|-----------|
| GeneCard | NLRP3     |
| GeneCard | DNAJB2    |
| GeneCard | CTSB      |
| GeneCard | SMAD3     |
| GeneCard | TSC1      |
| GeneCard | ASAH1     |
| GeneCard | CD4       |
| GeneCard | MIR143    |
| GeneCard | ECE1      |
| GeneCard | TMEM67    |
| GeneCard | SLC6A3    |
| GeneCard | CYP2D6    |
| GeneCard | SST       |
| GeneCard | HTRA2     |
| GeneCard | CD36      |
| GeneCard | PARK10    |
| GeneCard | FN1       |
| GeneCard | CHMP2B    |
| GeneCard | CAT       |
| GeneCard | DNM1L     |
| GeneCard | F5        |
| GeneCard | DRD2      |
| GeneCard | RELN      |
| GeneCard | DLD       |
| GeneCard | FGFR3     |
| GeneCard | FLNA      |
| GeneCard | SLC11A1   |
| GeneCard | COL25A1   |
| GeneCard | COL17A1   |
| GeneCard | RBP4      |
| GeneCard | DNAJB11   |
| GeneCard | SYP       |
| GeneCard | STAT1     |
| GeneCard | MAOB      |
| GeneCard | HNRNPA2B1 |
| GeneCard | SMAD6     |
| GeneCard | CETP      |
| GeneCard | DCTN1     |
| GeneCard | CACNA1C   |
| GeneCard | GNAQ      |
| GeneCard | DYNC2H1   |
| GeneCard | CXCL12    |
| GeneCard | PARK12    |
| GeneCard | PIK3R1    |
| GeneCard | GIGYF2    |
| GeneCard | GNAS      |
| GeneCard | IL2RA     |
| GeneCard | RPS27A    |
| GeneCard | ITPR1     |
| GeneCard | IRS1      |
| GeneCard | MTR       |
| GeneCard | BACE2     |
| GeneCard | DRD3      |
| GeneCard | SCARB2    |
| GeneCard | NAGA      |
| GeneCard | CDK5R1    |
| GeneCard | NHLRC1    |
| GeneCard | GSTM1     |

|          |          |
|----------|----------|
| GeneCard | ELN      |
| GeneCard | VDR      |
| GeneCard | MT-CO2   |
| GeneCard | NOTCH2   |
| GeneCard | BIN1     |
| GeneCard | DKK1     |
| GeneCard | CCL5     |
| GeneCard | IL13     |
| GeneCard | REST     |
| GeneCard | BAX      |
| GeneCard | DZIP1L   |
| GeneCard | GLE1     |
| GeneCard | KCNQ1    |
| GeneCard | AHI1     |
| GeneCard | HSPD1    |
| GeneCard | TRIM2    |
| GeneCard | CYP19A1  |
| GeneCard | MYBPC3   |
| GeneCard | FGFR2    |
| GeneCard | LCAT     |
| GeneCard | HMGCR    |
| GeneCard | CYCS     |
| GeneCard | PARK21   |
| GeneCard | DNAJC6   |
| GeneCard | SPTLC2   |
| GeneCard | COPA     |
| GeneCard | SDHB     |
| GeneCard | NOS1     |
| GeneCard | PLD3     |
| GeneCard | GP1BA    |
| GeneCard | ENPP1    |
| GeneCard | MT-ND4   |
| GeneCard | C4A      |
| GeneCard | B2M      |
| GeneCard | PAX2     |
| GeneCard | TNFRSF1B |
| GeneCard | CDH1     |
| GeneCard | FGFR1    |
| GeneCard | TERT     |
| GeneCard | SCN1A    |
| GeneCard | NTRK2    |
| GeneCard | KARS1    |
| GeneCard | TLR5     |
| GeneCard | GSTP1    |
| GeneCard | MMACHC   |
| GeneCard | PINK1-AS |
| GeneCard | MMP2     |
| GeneCard | NOTCH3   |
| GeneCard | CDH23    |
| GeneCard | HLA-DPB1 |
| GeneCard | ACTA1    |
| GeneCard | IQCB1    |
| GeneCard | IDUA     |
| GeneCard | PRKCD    |
| GeneCard | CD40LG   |
| GeneCard | ARSA     |
| GeneCard | MT-TK    |
| GeneCard | GJA1     |

|          |         |
|----------|---------|
| GeneCard | KRT5    |
| GeneCard | IL21    |
| GeneCard | FBXO7   |
| GeneCard | OLR1    |
| GeneCard | SDHC    |
| GeneCard | RHO     |
| GeneCard | PPARA   |
| GeneCard | UBB     |
| GeneCard | DNAJC13 |
| GeneCard | HARS1   |
| GeneCard | POLR2F  |
| GeneCard | MIF     |
| GeneCard | C3      |
| GeneCard | PPP3CA  |
| GeneCard | IL1R1   |
| GeneCard | CACNA1A |
| GeneCard | MYH9    |
| GeneCard | NDUFS4  |
| GeneCard | PRKG1   |
| GeneCard | F11     |
| GeneCard | GLB1    |
| GeneCard | NRAS    |
| GeneCard | IL12B   |
| GeneCard | AIFM1   |
| GeneCard | ABL1    |
| GeneCard | VLDLR   |
| GeneCard | TFAM    |
| GeneCard | DMD     |
| GeneCard | CSF1R   |
| GeneCard | PIN1    |
| GeneCard | POMC    |
| GeneCard | APOL1   |
| GeneCard | ABCB11  |
| GeneCard | MT-TL1  |
| GeneCard | PRKCQ   |
| GeneCard | ATG16L1 |
| GeneCard | EIF2AK4 |
| GeneCard | CCND1   |
| GeneCard | NPPB    |
| GeneCard | ENG     |
| GeneCard | ABCD1   |
| GeneCard | CASP1   |
| GeneCard | ACTB    |
| GeneCard | RUNX1   |
| GeneCard | WT1     |
| GeneCard | CREBBP  |
| GeneCard | SOD2    |
| GeneCard | FASLG   |
| GeneCard | MAPK14  |
| GeneCard | EDN1    |
| GeneCard | PEX6    |
| GeneCard | AD9     |
| GeneCard | CSF1    |
| GeneCard | ITCH    |
| GeneCard | PRMT7   |
| GeneCard | LPA     |
| GeneCard | TGFB2   |
| GeneCard | SDHD    |

|          |            |
|----------|------------|
| GeneCard | FLG        |
| GeneCard | COL4A3     |
| GeneCard | STAT4      |
| GeneCard | CSTB       |
| GeneCard | ADIPOQ     |
| GeneCard | NRG1       |
| GeneCard | CACNA1F    |
| GeneCard | RYR2       |
| GeneCard | NLRP1      |
| GeneCard | EPO        |
| GeneCard | SFTPC      |
| GeneCard | ALOX5      |
| GeneCard | PMM2       |
| GeneCard | EIF2AK2    |
| GeneCard | MIR93      |
| GeneCard | CDKN2B-AS1 |
| GeneCard | CYP46A1    |
| GeneCard | BBS1       |
| GeneCard | CLN6       |
| GeneCard | MT-CO3     |
| GeneCard | PRPS1      |
| GeneCard | LEPR       |
| GeneCard | MAPK3      |
| GeneCard | SLC2A1     |
| GeneCard | PON3       |
| GeneCard | PHKG2      |
| GeneCard | CALHM1     |
| GeneCard | PEX7       |
| GeneCard | S100B      |
| GeneCard | FGF23      |
| GeneCard | CX3CR1     |
| GeneCard | ELANE      |
| GeneCard | EIF2AK3    |
| GeneCard | ADH1C      |
| GeneCard | CREB1      |
| GeneCard | ZEB2       |
| GeneCard | MIR140     |
| GeneCard | MAPK8      |
| GeneCard | RELA       |
| GeneCard | SERPINC1   |
| GeneCard | H2AC18     |
| GeneCard | RIPK1      |
| GeneCard | F7         |
| GeneCard | TUBB       |
| GeneCard | ADAMTS4    |
| GeneCard | CAV1       |
| GeneCard | CASP9      |
| GeneCard | KCNH2      |
| GeneCard | GRIA1      |
| GeneCard | SPP1       |
| GeneCard | TMEM106B   |
| GeneCard | BSND       |
| GeneCard | ATXN8OS    |
| GeneCard | DNAJC5     |
| GeneCard | CD28       |
| GeneCard | CTNS       |
| GeneCard | GAB2       |
| GeneCard | CHRNA7     |

|          |          |
|----------|----------|
| GeneCard | LDHA     |
| GeneCard | PDGFRB   |
| GeneCard | APOC1    |
| GeneCard | PACRG    |
| GeneCard | TNFAIP3  |
| GeneCard | EDNRA    |
| GeneCard | SIRT1    |
| GeneCard | THBD     |
| GeneCard | USH2A    |
| GeneCard | TWNK     |
| GeneCard | SLC1A2   |
| GeneCard | PDCD1    |
| GeneCard | FMR1     |
| GeneCard | LMX1B    |
| GeneCard | HP       |
| GeneCard | ADAMTS13 |
| GeneCard | WFS1     |
| GeneCard | DHCR24   |
| GeneCard | FTL      |
| GeneCard | MBL2     |
| GeneCard | SRC      |
| GeneCard | CXCR4    |
| GeneCard | DOCK3    |
| GeneCard | SELP     |
| GeneCard | ABCG5    |
| GeneCard | SLC25A4  |
| GeneCard | CAPN1    |
| GeneCard | GSR      |
| GeneCard | CHCHD10  |
| GeneCard | SOS1     |
| GeneCard | CAMK2A   |
| GeneCard | SPG7     |
| GeneCard | EGF      |
| GeneCard | LRAT     |
| GeneCard | HSPA5    |
| GeneCard | ADA      |
| GeneCard | SMN2     |
| GeneCard | PRF1     |
| GeneCard | HTRA1    |
| GeneCard | IFNGR1   |
| GeneCard | CCL11    |
| GeneCard | CNTNAP2  |
| GeneCard | ICOSLG   |
| GeneCard | EP300    |
| GeneCard | ZAP70    |
| GeneCard | IRS2     |
| GeneCard | LTA      |
| GeneCard | UBQLN1   |
| GeneCard | MAPK10   |
| GeneCard | PDE11A   |
| GeneCard | TGFBR1   |
| GeneCard | IGF1R    |
| GeneCard | ITM2B    |
| GeneCard | MIR22    |
| GeneCard | SCN2A    |
| GeneCard | PNKP     |
| GeneCard | PAH      |
| GeneCard | AFG3L2   |

|          |         |
|----------|---------|
| GeneCard | CPT2    |
| GeneCard | ITGB3   |
| GeneCard | IL12A   |
| GeneCard | GPT     |
| GeneCard | DPYSL2  |
| GeneCard | MIR320A |
| GeneCard | CLN5    |
| GeneCard | MYC     |
| GeneCard | GRIA3   |
| GeneCard | TCF4    |
| GeneCard | GSK3A   |
| GeneCard | JPH3    |
| GeneCard | SNAP25  |
| GeneCard | APOC3   |
| GeneCard | PDYN    |
| GeneCard | MIR122  |
| GeneCard | BAG3    |
| GeneCard | GRK1    |
| GeneCard | IL6R    |
| GeneCard | PANK2   |
| GeneCard | MIR223  |
| GeneCard | TYR     |
| GeneCard | MIR29C  |
| GeneCard | TUBB4A  |
| GeneCard | PTCH1   |
| GeneCard | CHUK    |
| GeneCard | TUBB3   |
| GeneCard | GAL     |
| GeneCard | SELE    |
| GeneCard | SNCG    |
| GeneCard | NRTN    |
| GeneCard | F13A1   |
| GeneCard | BECN1   |
| GeneCard | ADRB2   |
| GeneCard | PRTN3   |
| GeneCard | FYN     |
| GeneCard | ATP2C1  |
| GeneCard | CSNK2A1 |
| GeneCard | CCL3    |
| GeneCard | CHRNA4  |
| GeneCard | NR2E3   |
| GeneCard | GNB4    |
| GeneCard | ZFYVE26 |
| GeneCard | EIF4G1  |
| GeneCard | COX5A   |
| GeneCard | SDHA    |
| GeneCard | APH1A   |
| GeneCard | MIR125A |
| GeneCard | CYP2C9  |
| GeneCard | ACAN    |
| GeneCard | ITGAM   |
| GeneCard | VDAC1   |
| GeneCard | STXBP1  |
| GeneCard | EXOC3L2 |
| GeneCard | IL7R    |
| GeneCard | BICC1   |
| GeneCard | HAMP    |
| GeneCard | ITGA2B  |

|          |         |
|----------|---------|
| GeneCard | F12     |
| GeneCard | MAP2    |
| GeneCard | ATF6    |
| GeneCard | RLBP1   |
| GeneCard | HNF4A   |
| GeneCard | GHRL    |
| GeneCard | HBA1    |
| GeneCard | IKBKB   |
| GeneCard | DDIT3   |
| GeneCard | GRK2    |
| GeneCard | NDUFAF6 |
| GeneCard | NR3C1   |
| GeneCard | CTNNA3  |
| GeneCard | VCL     |
| GeneCard | NGFR    |
| GeneCard | SMC1A   |
| GeneCard | PEX1    |
| GeneCard | ERCC2   |
| GeneCard | NFKBIA  |
| GeneCard | DLG4    |
| GeneCard | NEK8    |
| GeneCard | AQP4    |
| GeneCard | NR1H4   |
| GeneCard | SETBP1  |
| GeneCard | PLCB1   |
| GeneCard | TNNI3   |
| GeneCard | CACNA1D |
| GeneCard | CFAP410 |
| GeneCard | PRKACA  |
| GeneCard | LOX     |
| GeneCard | MFSD8   |
| GeneCard | NTF3    |
| GeneCard | F3      |
| GeneCard | CALM1   |
| GeneCard | PCDH11X |
| GeneCard | SLC1A3  |
| GeneCard | SH2D1A  |
| GeneCard | LIPC    |
| GeneCard | LMNB1   |
| GeneCard | MT-ATP8 |
| GeneCard | PNPLA3  |
| GeneCard | CD2AP   |
| GeneCard | DBN1    |
| GeneCard | NDUFV1  |
| GeneCard | IGF2    |
| GeneCard | ITPR3   |
| GeneCard | GLUL    |
| GeneCard | SYK     |
| GeneCard | HIF1A   |
| GeneCard | GCH1    |
| GeneCard | ARSB    |
| GeneCard | MSH6    |
| GeneCard | ACTC1   |
| GeneCard | FARSB   |
| GeneCard | APLP2   |
| GeneCard | RPGR    |
| GeneCard | RBCK1   |
| GeneCard | FGF2    |



|          |          |
|----------|----------|
| GeneCard | GUSB     |
| GeneCard | MIR144   |
| GeneCard | VCAM1    |
| GeneCard | GALNS    |
| GeneCard | PVALB    |
| GeneCard | MPL      |
| GeneCard | MT-ND4L  |
| GeneCard | IFNA1    |
| GeneCard | CSF3     |
| GeneCard | VPS26A   |
| GeneCard | KIF5A    |
| GeneCard | CDH2     |
| GeneCard | MIR433   |
| GeneCard | CSF2     |
| GeneCard | COX4I1   |
| GeneCard | COG2     |
| GeneCard | MKKS     |
| GeneCard | CHI3L1   |
| GeneCard | MSH2     |
| GeneCard | VAPB     |
| GeneCard | XDH      |
| GeneCard | CAST     |
| GeneCard | FZD4     |
| GeneCard | TNFSF11  |
| GeneCard | EMD      |
| GeneCard | P2RY12   |
| GeneCard | GRIA2    |
| GeneCard | CCR1     |
| GeneCard | VPS13B   |
| GeneCard | CACNA1S  |
| GeneCard | DES      |
| GeneCard | DRD1     |
| GeneCard | PKP2     |
| GeneCard | UBC      |
| GeneCard | CASP7    |
| GeneCard | DHTKD1   |
| GeneCard | FGA      |
| GeneCard | CALR     |
| GeneCard | GLUD2    |
| GeneCard | KCNV2    |
| GeneCard | APAF1    |
| GeneCard | MAOA     |
| GeneCard | GAD2     |
| GeneCard | PAX6     |
| GeneCard | GLUD1    |
| GeneCard | SP1      |
| GeneCard | STH      |
| GeneCard | ABCC8    |
| GeneCard | BCL2     |
| GeneCard | PTH      |
| GeneCard | AGTR2    |
| GeneCard | SREBF1   |
| GeneCard | BMP2     |
| GeneCard | SERPINI1 |
| GeneCard | PPT1     |
| GeneCard | CD79A    |
| GeneCard | JUN      |
| GeneCard | PKD2L1   |

|          |          |
|----------|----------|
| GeneCard | MT3      |
| GeneCard | MAP1B    |
| GeneCard | ALPL     |
| GeneCard | PDE8B    |
| GeneCard | ENO3     |
| GeneCard | APOD     |
| GeneCard | CHRN2    |
| GeneCard | SGPL1    |
| GeneCard | MITF     |
| GeneCard | F10      |
| GeneCard | FADD     |
| GeneCard | SIGMAR1  |
| GeneCard | JCAD     |
| GeneCard | PCSK9    |
| GeneCard | SPATA22  |
| GeneCard | IFIH1    |
| GeneCard | TIMP1    |
| GeneCard | AQP1     |
| GeneCard | CHEK2    |
| GeneCard | MAPK8IP1 |
| GeneCard | CLCN7    |
| GeneCard | CXCL10   |
| GeneCard | KIF1A    |
| GeneCard | PITX2    |
| GeneCard | DLST     |
| GeneCard | BGLAP    |
| GeneCard | FOLH1    |
| GeneCard | MYLK     |
| GeneCard | IRGM     |
| GeneCard | UBQLN2   |
| GeneCard | PLG      |
| GeneCard | PRODH    |
| GeneCard | TOR1A    |
| GeneCard | TET2     |
| GeneCard | MIR133B  |
| GeneCard | NFE2L2   |
| GeneCard | RYR3     |
| GeneCard | APOA5    |
| GeneCard | BTNL2    |
| GeneCard | KIF11    |
| GeneCard | HSPA4    |
| GeneCard | SLC5A7   |
| GeneCard | CNTNAP1  |
| GeneCard | PLAT     |
| GeneCard | ETV6     |
| GeneCard | RCAN1    |
| GeneCard | OPA1     |
| GeneCard | HLA-DRB5 |
| GeneCard | CLSTN1   |
| GeneCard | EIF2S1   |
| GeneCard | RETN     |
| GeneCard | TFRC     |
| GeneCard | MIR182   |
| GeneCard | PTPRC    |
| GeneCard | MAP3K5   |
| GeneCard | TLR3     |
| GeneCard | TEK      |
| GeneCard | XIAP     |

|          |          |
|----------|----------|
| GeneCard | ATP1A1   |
| GeneCard | PDK3     |
| GeneCard | GPC1     |
| GeneCard | SCO1     |
| GeneCard | GNPTAB   |
| GeneCard | HPRT1    |
| GeneCard | ARID1B   |
| GeneCard | CHIT1    |
| GeneCard | GNB3     |
| GeneCard | KL       |
| GeneCard | DAPK1    |
| GeneCard | MBP      |
| GeneCard | NRXN1    |
| GeneCard | CFHR2    |
| GeneCard | CAPN2    |
| GeneCard | KCNJ11   |
| GeneCard | FCGR2B   |
| GeneCard | SLC19A1  |
| GeneCard | MIR98    |
| GeneCard | CRYAA    |
| GeneCard | HRH2     |
| GeneCard | NODAL    |
| GeneCard | TSPO     |
| GeneCard | RUNX2    |
| GeneCard | DCDC2    |
| GeneCard | CRH      |
| GeneCard | CBS      |
| GeneCard | DRD4     |
| GeneCard | TPO      |
| GeneCard | S100A9   |
| GeneCard | HNF1A    |
| GeneCard | MIR30E   |
| GeneCard | CD19     |
| GeneCard | FCGR3A   |
| GeneCard | MIR20A   |
| GeneCard | DISC1    |
| GeneCard | LRP8     |
| GeneCard | GRIN2D   |
| GeneCard | NDUFV2   |
| GeneCard | ERN1     |
| GeneCard | HADHA    |
| GeneCard | TBC1D24  |
| GeneCard | FKTN     |
| GeneCard | CSNK1D   |
| GeneCard | GNE      |
| GeneCard | MIRLET7I |
| GeneCard | NPPA     |
| GeneCard | ATXN1    |
| GeneCard | NDUFS2   |
| GeneCard | IAPP     |
| GeneCard | SCO2     |
| GeneCard | GRM5     |
| GeneCard | MYD88    |
| GeneCard | CCN2     |
| GeneCard | FOS      |
| GeneCard | CDK1     |
| GeneCard | MIR142   |
| GeneCard | COL4A2   |

|          |          |
|----------|----------|
| GeneCard | CIB1     |
| GeneCard | COL11A2  |
| GeneCard | PMPCA    |
| GeneCard | UBE2L3   |
| GeneCard | TNNT2    |
| GeneCard | APBA1    |
| GeneCard | SLC2A2   |
| GeneCard | SERPINH1 |
| GeneCard | POLR1C   |
| GeneCard | COL9A2   |
| GeneCard | WDR45    |
| GeneCard | FLNC     |
| GeneCard | NR3C2    |
| GeneCard | TLR9     |
| GeneCard | GRIN2C   |
| GeneCard | SAR1B    |
| GeneCard | KCNN4    |
| GeneCard | MEF2A    |
| GeneCard | NOX1     |
| GeneCard | MATR3    |
| GeneCard | HSPG2    |
| GeneCard | ENO2     |
| GeneCard | SETX     |
| GeneCard | SLC22A5  |
| GeneCard | COQ2     |
| GeneCard | MMP13    |
| GeneCard | MIR34C   |
| GeneCard | DNMT1    |
| GeneCard | SPAST    |
| GeneCard | PLA2G4A  |
| GeneCard | NPY      |
| GeneCard | PTPA     |
| GeneCard | SEMA3C   |
| GeneCard | COL6A1   |
| GeneCard | VSNL1    |
| GeneCard | GNB1     |
| GeneCard | COX6A1   |
| GeneCard | TUBA4A   |
| GeneCard | PEX2     |
| GeneCard | UBE3A    |
| GeneCard | MIR221   |
| GeneCard | ESR2     |
| GeneCard | TERC     |
| GeneCard | PITRM1   |
| GeneCard | CACNA1G  |
| GeneCard | FRMD4A   |
| GeneCard | LBR      |
| GeneCard | BBS4     |
| GeneCard | CUBN     |
| GeneCard | CALCA    |
| GeneCard | RAG1     |
| GeneCard | STAT5B   |
| GeneCard | ADNP     |
| GeneCard | APBA2    |
| GeneCard | SLC18A3  |
| GeneCard | PAWR     |
| GeneCard | GSTO1    |
| GeneCard | FOXG1    |

|          |              |
|----------|--------------|
| GeneCard | PODXL        |
| GeneCard | GGT1         |
| GeneCard | DBH          |
| GeneCard | CHGA         |
| GeneCard | MSRA         |
| GeneCard | RB1CC1       |
| GeneCard | NAE1         |
| GeneCard | TFCP2        |
| GeneCard | BMP6         |
| GeneCard | ERCC1        |
| GeneCard | TLR1         |
| GeneCard | NEFM         |
| GeneCard | HCRT         |
| GeneCard | AXIN1        |
| GeneCard | SETD2        |
| GeneCard | BAD          |
| GeneCard | CIITA        |
| GeneCard | FXN          |
| GeneCard | SERPINF1     |
| GeneCard | PDGFRA       |
| GeneCard | ATF4         |
| GeneCard | SLC18A2      |
| GeneCard | LOC108663987 |
| GeneCard | PDGFB        |
| GeneCard | NRGN         |
| GeneCard | CD14         |
| GeneCard | UGT1A1       |
| GeneCard | SLC40A1      |
| GeneCard | DDC          |
| GeneCard | MARK1        |
| GeneCard | BMP4         |
| GeneCard | GPX1         |
| GeneCard | MTRR         |
| GeneCard | KCNMA1       |
| GeneCard | SYNE1        |
| GeneCard | KCNQ2        |
| GeneCard | CASP6        |
| GeneCard | TGM2         |
| GeneCard | SFTPA2       |
| GeneCard | EPOR         |
| GeneCard | TUBA1B       |
| GeneCard | TUBB2A       |
| GeneCard | PLA2G7       |
| GeneCard | BCL11A       |
| GeneCard | HMGB1        |
| GeneCard | L1CAM        |
| GeneCard | KCNIP3       |
| GeneCard | ACTN4        |
| GeneCard | ITGB1        |
| GeneCard | U2AF1        |
| GeneCard | PRL          |
| GeneCard | YARS2        |
| GeneCard | SPTAN1       |
| GeneCard | GMPPB        |
| GeneCard | LDB3         |
| GeneCard | NEK9         |
| GeneCard | BTK          |
| GeneCard | NCAM1        |

|          |              |
|----------|--------------|
| GeneCard | COL18A1      |
| GeneCard | ADAR         |
| GeneCard | HTR2C        |
| GeneCard | ANG          |
| GeneCard | MIR30A       |
| GeneCard | SCN8A        |
| GeneCard | GSAP         |
| GeneCard | FLT1         |
| GeneCard | JAK3         |
| GeneCard | DYSF         |
| GeneCard | IDH1         |
| GeneCard | WNT1         |
| GeneCard | SFTPA1       |
| GeneCard | CRYAB        |
| GeneCard | SOX2         |
| GeneCard | SLC4A1       |
| GeneCard | PLEC         |
| GeneCard | LOC109504728 |
| GeneCard | KNG1         |
| GeneCard | ALS2         |
| GeneCard | PCSK1N       |
| GeneCard | CH25H        |
| GeneCard | IL4R         |
| GeneCard | CD27         |
| GeneCard | CDKN2B       |
| GeneCard | ERBB3        |
| GeneCard | ATN1         |
| GeneCard | IL37         |
| GeneCard | HSP90AA1     |
| GeneCard | SOX9         |
| GeneCard | GCK          |
| GeneCard | MIR27A       |
| GeneCard | CFB          |
| GeneCard | PTGS1        |
| GeneCard | EDAR         |
| GeneCard | CARD8        |
| GeneCard | PAFAH1B1     |
| GeneCard | SLC25A16     |
| GeneCard | CAMK2G       |
| GeneCard | PFN1         |
| GeneCard | PIK3C3       |
| GeneCard | INA          |
| GeneCard | MIR197       |
| GeneCard | LTF          |
| GeneCard | OGT          |
| GeneCard | NRP1         |
| GeneCard | MYO9B        |
| GeneCard | GSTO2        |
| GeneCard | CHCHD2       |
| GeneCard | TBX1         |
| GeneCard | MARK4        |
| GeneCard | RTN4         |
| GeneCard | KITLG        |
| GeneCard | TNFSF15      |
| GeneCard | AFP          |
| GeneCard | SYNGAP1      |
| GeneCard | C4B          |
| GeneCard | MIR9-1       |

|          |              |
|----------|--------------|
| GeneCard | MBD5         |
| GeneCard | TCTN2        |
| GeneCard | IFNGR2       |
| GeneCard | LOC109461479 |
| GeneCard | ALDOA        |
| GeneCard | TYROBP       |
| GeneCard | SPARC        |
| GeneCard | MTHFD1L      |
| GeneCard | GAP43        |
| GeneCard | CDKN1A       |
| GeneCard | SAA1         |
| GeneCard | DCTN4        |
| GeneCard | BLMH         |
| GeneCard | LRP2         |
| GeneCard | DKK4         |
| GeneCard | MIR483       |
| GeneCard | MIR31        |
| GeneCard | APLP1        |
| GeneCard | BACE1-AS     |
| GeneCard | NDE1         |
| GeneCard | KDR          |
| GeneCard | CHRM1        |
| GeneCard | JAK1         |
| GeneCard | PEX3         |
| GeneCard | SORCS3       |
| GeneCard | NALCN        |
| GeneCard | RB1          |
| GeneCard | TAB2         |
| GeneCard | STK11        |
| GeneCard | AKR1B1       |
| GeneCard | DKK2         |
| GeneCard | SMAD2        |
| GeneCard | APH1B        |
| GeneCard | IKZF1        |
| GeneCard | PTGDS        |
| GeneCard | VIM          |
| GeneCard | PPP3R1       |
| GeneCard | KCNA2        |
| GeneCard | MEF2C        |
| GeneCard | APBB2        |
| GeneCard | C10orf55     |
| GeneCard | ANK3         |
| GeneCard | DNMT3A       |
| GeneCard | LRRC56       |
| GeneCard | HLA-G        |
| GeneCard | ITPR2        |
| GeneCard | MIR26B       |
| GeneCard | OTC          |
| GeneCard | CYP2E1       |
| GeneCard | TJP2         |
| GeneCard | MED12        |
| GeneCard | PECAM1       |
| GeneCard | PPIF         |
| GeneCard | GABRG2       |
| GeneCard | ASXL1        |
| GeneCard | APOH         |
| GeneCard | UQCRC1       |
| GeneCard | MAPK9        |

|          |          |
|----------|----------|
| GeneCard | NQO1     |
| GeneCard | CR2      |
| GeneCard | TANGO2   |
| GeneCard | KLC1     |
| GeneCard | CDKN1B   |
| GeneCard | EYS      |
| GeneCard | PLA2G2A  |
| GeneCard | PTH1R    |
| GeneCard | IAH1     |
| GeneCard | NECTIN2  |
| GeneCard | FHL1     |
| GeneCard | MSR1     |
| GeneCard | GH1      |
| GeneCard | C5       |
| GeneCard | MT-TS1   |
| GeneCard | MIR222   |
| GeneCard | KRT1     |
| GeneCard | LRPAP1   |
| GeneCard | CPS1     |
| GeneCard | SELL     |
| GeneCard | ATP1A3   |
| GeneCard | AD15     |
| GeneCard | APOA2    |
| GeneCard | TRAF3IP1 |
| GeneCard | SET      |
| GeneCard | PCDH15   |
| GeneCard | TNFSF13B |
| GeneCard | VDAC2    |
| GeneCard | POGZ     |
| GeneCard | GAD1     |
| GeneCard | GLIS2    |
| GeneCard | NPEPPS   |
| GeneCard | KRT18    |
| GeneCard | NDUFS3   |
| GeneCard | EXOSC3   |
| GeneCard | PEX26    |
| GeneCard | TP63     |
| GeneCard | ADCYAP1  |
| GeneCard | IL15     |
| GeneCard | PEX19    |
| GeneCard | PIK3R4   |
| GeneCard | FANCD2   |
| GeneCard | CYP17A1  |
| GeneCard | PSMC6    |
| GeneCard | SERPINF2 |
| GeneCard | MIR128-1 |
| GeneCard | IGFBP3   |
| GeneCard | GSN      |
| GeneCard | KRT8     |
| GeneCard | CD55     |
| GeneCard | TCIRG1   |
| GeneCard | GSTT1    |
| GeneCard | LCN2     |
| GeneCard | KRT14    |
| GeneCard | NOX4     |
| GeneCard | PEX16    |
| GeneCard | SLC16A2  |
| GeneCard | RAD51C   |



|          |         |
|----------|---------|
| GeneCard | CBL     |
| GeneCard | IARS2   |
| GeneCard | PLOD1   |
| GeneCard | SEMA3A  |
| GeneCard | ADAM12  |
| GeneCard | MET     |
| GeneCard | HSPA8   |
| GeneCard | HK1     |
| GeneCard | ITGA4   |
| GeneCard | ANXA11  |
| GeneCard | TREX1   |
| GeneCard | CYP7B1  |
| GeneCard | B9D1    |
| GeneCard | SORCS1  |
| GeneCard | ANKH    |
| GeneCard | SLC26A4 |
| GeneCard | TRPC6   |
| GeneCard | TUBA1A  |
| GeneCard | KLK8    |
| GeneCard | CXCR3   |
| GeneCard | KANSL1  |
| GeneCard | EPCAM   |
| GeneCard | MIR200B |
| GeneCard | ASAH2   |
| GeneCard | LAMA2   |
| GeneCard | EBF3    |
| GeneCard | ADK     |
| GeneCard | SPR     |
| GeneCard | REG1A   |
| GeneCard | STX1A   |
| GeneCard | MMUT    |
| GeneCard | CD46    |
| GeneCard | SPATA7  |
| GeneCard | COL6A2  |
| GeneCard | NDUFS1  |
| GeneCard | SFTPD   |
| GeneCard | IL7     |
| GeneCard | PRPH    |
| GeneCard | TFG     |
| GeneCard | PADI2   |
| GeneCard | MIR200A |
| GeneCard | WARS1   |
| GeneCard | RETREG1 |
| GeneCard | FANCI   |
| GeneCard | ALDH2   |
| GeneCard | DCTN2   |
| GeneCard | STX3    |
| GeneCard | IL3     |
| GeneCard | PNMT    |
| GeneCard | PIK3CD  |
| GeneCard | HDAC9   |
| GeneCard | FGF8    |
| GeneCard | CCR2    |
| GeneCard | PRSS1   |
| GeneCard | MAG     |
| GeneCard | HBG2    |
| GeneCard | CDC42   |
| GeneCard | XRCC1   |

|          |          |
|----------|----------|
| GeneCard | NDUFAF2  |
| GeneCard | RPS6KA3  |
| GeneCard | NEU1     |
| GeneCard | MEOX2    |
| GeneCard | ATG13    |
| GeneCard | MIR127   |
| GeneCard | KAT6B    |
| GeneCard | S100A8   |
| GeneCard | PHEX     |
| GeneCard | AKT2     |
| GeneCard | DDX58    |
| GeneCard | MMP12    |
| GeneCard | BLOC1S3  |
| GeneCard | FLI1     |
| GeneCard | MIR141   |
| GeneCard | GHR      |
| GeneCard | CNTF     |
| GeneCard | IL33     |
| GeneCard | ATP2A1   |
| GeneCard | TUBA3D   |
| GeneCard | WWOX     |
| GeneCard | H19      |
| GeneCard | NR1H3    |
| GeneCard | KALRN    |
| GeneCard | IL23A    |
| GeneCard | AFF2     |
| GeneCard | BCL2L1   |
| GeneCard | GSS      |
| GeneCard | SMARCA2  |
| GeneCard | HNMT     |
| GeneCard | CYP11B2  |
| GeneCard | MIR181A1 |
| GeneCard | CYP1A1   |
| GeneCard | MT-TF    |
| GeneCard | PURA     |
| GeneCard | SLC2A3   |
| GeneCard | CTSK     |
| GeneCard | MUTYH    |
| GeneCard | DDX3X    |
| GeneCard | GSTM3    |
| GeneCard | MMP14    |
| GeneCard | ACTG1    |
| GeneCard | DBNL     |
| GeneCard | SNAP29   |
| GeneCard | AVP      |
| GeneCard | F11-AS1  |
| GeneCard | MIR10A   |
| GeneCard | FBLN5    |
| GeneCard | ITGB2    |
| GeneCard | TPMT     |
| GeneCard | GCG      |
| GeneCard | ANKS6    |
| GeneCard | TAF1     |
| GeneCard | ADORA2A  |
| GeneCard | SLC52A3  |
| GeneCard | CD34     |
| GeneCard | MBTPS2   |
| GeneCard | LIFR     |

|          |          |
|----------|----------|
| GeneCard | NAT2     |
| GeneCard | CSNK1A1  |
| GeneCard | MDM2     |
| GeneCard | MAZ      |
| GeneCard | CD80     |
| GeneCard | SLC25A13 |
| GeneCard | CLTC     |
| GeneCard | ARPC1B   |
| GeneCard | ISG15    |
| GeneCard | WNK1     |
| GeneCard | DNAH11   |
| GeneCard | PSMC2    |
| GeneCard | KIF5B    |
| GeneCard | PSMD4    |
| GeneCard | AMBRA1   |
| GeneCard | GBA2     |
| GeneCard | DNAH8    |
| GeneCard | FGF20    |
| GeneCard | PROS1    |
| GeneCard | DCR      |
| GeneCard | EPRS1    |
| GeneCard | OPN4     |
| GeneCard | NRXN3    |
| GeneCard | CYP3A4   |
| GeneCard | ATL1     |
| GeneCard | MCOLN1   |
| GeneCard | DNTT     |
| GeneCard | HLA-DPA1 |
| GeneCard | RTN3     |
| GeneCard | VRK1     |
| GeneCard | TGIF1    |
| GeneCard | MT-TT    |
| GeneCard | NDUFA13  |
| GeneCard | CSNK1A1L |
| GeneCard | PLCE1    |
| GeneCard | ATP5F1C  |
| GeneCard | SHANK3   |
| GeneCard | DNMT3B   |
| GeneCard | MRE11    |
| GeneCard | PEBP1    |
| GeneCard | CEP164   |
| GeneCard | RD3      |
| GeneCard | PARP1    |
| GeneCard | YAP1     |
| GeneCard | FH       |
| GeneCard | CALML3   |
| GeneCard | PAX3     |
| GeneCard | SLC2A9   |
| GeneCard | NCKAP1   |
| GeneCard | DAO      |
| GeneCard | GPR3     |
| GeneCard | FKBP10   |
| GeneCard | HGF      |
| GeneCard | NDUFA6   |
| GeneCard | WNT8B    |
| GeneCard | BRF1     |
| GeneCard | FGG      |
| GeneCard | EIF2B5   |

|          |          |
|----------|----------|
| GeneCard | CHRNA3   |
| GeneCard | PSMC1    |
| GeneCard | CCNF     |
| GeneCard | MIR200C  |
| GeneCard | KCNJ10   |
| GeneCard | NTRK3    |
| GeneCard | IRAK4    |
| GeneCard | BCR      |
| GeneCard | TMEM126B |
| GeneCard | MIR214   |
| GeneCard | TM2D1    |
| GeneCard | PPID     |
| GeneCard | SON      |
| GeneCard | ATXN7    |
| GeneCard | NDUFS7   |
| GeneCard | MFSD2A   |
| GeneCard | PEX14    |
| GeneCard | MRC1     |
| GeneCard | MIR181C  |
| GeneCard | DVL1     |
| GeneCard | FGF      |
| GeneCard | YWHAQ    |
| GeneCard | PIK3R2   |
| GeneCard | STN1     |
| GeneCard | LAMP1    |
| GeneCard | GRM1     |
| GeneCard | EPHA4    |
| GeneCard | MIAT     |
| GeneCard | USP8     |
| GeneCard | PIK3C2A  |
| GeneCard | MAGI2    |
| GeneCard | TPM3     |
| GeneCard | MT-TV    |
| GeneCard | HDAC6    |
| GeneCard | HOTAIR   |
| GeneCard | CEACAM6  |
| GeneCard | ULK1     |
| GeneCard | FLNB     |
| GeneCard | DSG1     |
| GeneCard | CCK      |
| GeneCard | C19orf12 |
| GeneCard | DSC2     |
| GeneCard | KCNJ5    |
| GeneCard | SPPL2A   |
| GeneCard | SOX2-OT  |
| GeneCard | ATG14    |
| GeneCard | TPH1     |
| GeneCard | IGF2R    |
| GeneCard | SLC6A1   |
| GeneCard | OGG1     |
| GeneCard | CDHR1    |
| GeneCard | MCU      |
| GeneCard | FZD6     |
| GeneCard | BLVRA    |
| GeneCard | KLK3     |
| GeneCard | BGN      |
| GeneCard | NDUFA1   |
| GeneCard | CDK4     |

|          |          |
|----------|----------|
| GeneCard | DKC1     |
| GeneCard | NF2      |
| GeneCard | HTR7     |
| GeneCard | FLOT1    |
| GeneCard | AIF1     |
| GeneCard | CD33     |
| GeneCard | IREB2    |
| GeneCard | CCNB1    |
| GeneCard | TSPAN12  |
| GeneCard | STAR     |
| GeneCard | TCF7L2   |
| GeneCard | RAB39B   |
| GeneCard | FLCN     |
| GeneCard | GLRA1    |
| GeneCard | DMPK     |
| GeneCard | MT-TH    |
| GeneCard | PRSS23   |
| GeneCard | HSPA1A   |
| GeneCard | MIR486-1 |
| GeneCard | XPNPEP3  |
| GeneCard | ABCC2    |
| GeneCard | ALDH18A1 |
| GeneCard | CCR3     |
| GeneCard | ANXA5    |
| GeneCard | CA2      |
| GeneCard | TNFRSF21 |
| GeneCard | C1S      |
| GeneCard | COMP     |
| GeneCard | CNR1     |
| GeneCard | NAIP     |
| GeneCard | STUB1    |
| GeneCard | NDUFS8   |
| GeneCard | XBP1     |
| GeneCard | KCNQ3    |
| GeneCard | AHSG     |
| GeneCard | PSMB9    |
| GeneCard | PIGL     |
| GeneCard | MIR195   |
| GeneCard | COX10    |
| GeneCard | GZMB     |
| GeneCard | CHM      |
| GeneCard | HNRNPK   |
| GeneCard | KCNE1    |
| GeneCard | ENO1     |
| GeneCard | CCL4     |
| GeneCard | BCYRN1   |
| GeneCard | RAC1     |
| GeneCard | UNC13A   |
| GeneCard | MGP      |
| GeneCard | AP4M1    |
| GeneCard | MAF      |
| GeneCard | LAMB2    |
| GeneCard | NRBF2    |
| GeneCard | SCARB1   |
| GeneCard | DSG2     |
| GeneCard | MLXIPL   |
| GeneCard | ATP5F1B  |
| GeneCard | ACE2     |

|          |              |
|----------|--------------|
| GeneCard | TIMP2        |
| GeneCard | PSMB8        |
| GeneCard | GFRA1        |
| GeneCard | PRDX1        |
| GeneCard | EIF2B2       |
| GeneCard | TRIM32       |
| GeneCard | ADD1         |
| GeneCard | SYN3         |
| GeneCard | SLPI         |
| GeneCard | IDO1         |
| GeneCard | IL9          |
| GeneCard | TPM1         |
| GeneCard | MYOC         |
| GeneCard | KLK6         |
| GeneCard | PTRH2        |
| GeneCard | PRKCG        |
| GeneCard | PLCG2        |
| GeneCard | MMP8         |
| GeneCard | USP9X        |
| GeneCard | DNASE1       |
| GeneCard | DLAT         |
| GeneCard | TGM1         |
| GeneCard | HADHB        |
| GeneCard | TLR7         |
| GeneCard | TNXB         |
| GeneCard | FPR2         |
| GeneCard | TIA1         |
| GeneCard | WASHC5       |
| GeneCard | EHMT1        |
| GeneCard | OTX2         |
| GeneCard | MKI67        |
| GeneCard | SHBG         |
| GeneCard | PKD1L2       |
| GeneCard | IRAK1        |
| GeneCard | PHF6         |
| GeneCard | TAC1         |
| GeneCard | ADARB2       |
| GeneCard | DPP4         |
| GeneCard | FUCA1        |
| GeneCard | ADCY10       |
| GeneCard | PCNT         |
| GeneCard | DRP2         |
| GeneCard | IGFBP1       |
| GeneCard | TET1         |
| GeneCard | LOC106694315 |
| GeneCard | GDF15        |
| GeneCard | MTFMT        |
| GeneCard | MOG          |
| GeneCard | RHOBTB2      |
| GeneCard | MT-TP        |
| GeneCard | HLA-DRA      |
| GeneCard | DST          |
| GeneCard | ZNF423       |
| GeneCard | PHKG1        |
| GeneCard | CUL4B        |
| GeneCard | NPC1L1       |
| GeneCard | PRDX3        |
| GeneCard | BLM          |

|          |          |
|----------|----------|
| GeneCard | SLC12A4  |
| GeneCard | RAB27A   |
| GeneCard | NDUFB9   |
| GeneCard | ANK2     |
| GeneCard | HM13     |
| GeneCard | EWSR1    |
| GeneCard | C1R      |
| GeneCard | TCTN3    |
| GeneCard | CD68     |
| GeneCard | SLC17A7  |
| GeneCard | RHD      |
| GeneCard | MB       |
| GeneCard | SMARCB1  |
| GeneCard | TMEM43   |
| GeneCard | SLC29A3  |
| GeneCard | GCLC     |
| GeneCard | DNM1     |
| GeneCard | IMPG1    |
| GeneCard | CLDN16   |
| GeneCard | AGRN     |
| GeneCard | RPL5     |
| GeneCard | NDUFS6   |
| GeneCard | TIMP3    |
| GeneCard | CYP2C19  |
| GeneCard | LGALS3   |
| GeneCard | HTR1A    |
| GeneCard | VIP      |
| GeneCard | NPM1     |
| GeneCard | VDAC3    |
| GeneCard | SLC17A6  |
| GeneCard | MIR124-1 |
| GeneCard | PGR      |
| GeneCard | MAP2K2   |
| GeneCard | CALB1    |
| GeneCard | CALB2    |
| GeneCard | GPHN     |
| GeneCard | PABPN1   |
| GeneCard | PRKCA    |
| GeneCard | ITGA2    |
| GeneCard | IVNS1ABP |
| GeneCard | MICA     |
| GeneCard | SLC6A2   |
| GeneCard | CCDC40   |
| GeneCard | SFRP4    |
| GeneCard | MIR205   |
| GeneCard | SLC22A12 |
| GeneCard | ANXA7    |
| GeneCard | HBG1     |
| GeneCard | THBS2    |
| GeneCard | SUOX     |
| GeneCard | SOCS1    |
| GeneCard | FRAT1    |
| GeneCard | CD274    |
| GeneCard | FGFR4    |
| GeneCard | SRSF2    |
| GeneCard | MED12L   |
| GeneCard | DTNBP1   |
| GeneCard | ASCL1    |

|          |          |
|----------|----------|
| GeneCard | PACS1    |
| GeneCard | SORT1    |
| GeneCard | IL21-AS1 |
| GeneCard | PEX11B   |
| GeneCard | MYOCD    |
| GeneCard | AXIN2    |
| GeneCard | MYOT     |
| GeneCard | EEF1A2   |
| GeneCard | PDE4D    |
| GeneCard | USH1C    |
| GeneCard | CFP      |
| GeneCard | AIMP1    |
| GeneCard | HPS6     |
| GeneCard | MIR363   |
| GeneCard | ZMPSTE24 |
| GeneCard | CTCF     |
| GeneCard | UBQLN4   |
| GeneCard | PGM1     |
| GeneCard | MIR15B   |
| GeneCard | BCL6     |
| GeneCard | SLC30A10 |
| GeneCard | GAN      |
| GeneCard | IRF8     |
| GeneCard | M6PR     |
| GeneCard | ERCC4    |
| GeneCard | COL12A1  |
| GeneCard | PRKD1    |
| GeneCard | TAP2     |
| GeneCard | BMPR1A   |
| GeneCard | ERCC8    |
| GeneCard | DLL1     |
| GeneCard | ASTN2    |
| GeneCard | GRIA4    |
| GeneCard | GTPBP4   |
| GeneCard | MIR125B1 |
| GeneCard | SCAPER   |
| GeneCard | MIR148A  |
| GeneCard | CD44     |
| GeneCard | TAP1     |
| GeneCard | ACTN2    |
| GeneCard | TAF15    |
| GeneCard | TFEB     |
| GeneCard | RAB5A    |
| GeneCard | GCDH     |
| GeneCard | CA4      |
| GeneCard | BMP1     |
| GeneCard | LMNB2    |
| GeneCard | FTO      |
| GeneCard | TSLP     |
| GeneCard | COL6A3   |
| GeneCard | MMEL1    |
| GeneCard | LRRTM3   |
| GeneCard | ARL3     |
| GeneCard | MIR24-1  |
| GeneCard | THRB     |
| GeneCard | SIGLEC5  |
| GeneCard | ZEB1     |
| GeneCard | DCN      |



|          |           |
|----------|-----------|
| GeneCard | FURIN     |
| GeneCard | PDE5A     |
| GeneCard | EIF2B4    |
| GeneCard | ARG1      |
| GeneCard | THOP1     |
| GeneCard | NOTCH4    |
| GeneCard | PDX1      |
| GeneCard | MIR34B    |
| GeneCard | ASPM      |
| GeneCard | SLC9A6    |
| GeneCard | GATM      |
| GeneCard | DGUOK     |
| GeneCard | NLGN3     |
| GeneCard | GATA2     |
| GeneCard | PF4       |
| GeneCard | DSCAM     |
| GeneCard | HINT1     |
| GeneCard | NOTCH2NLC |
| GeneCard | KIR3DL1   |
| GeneCard | UGCG      |
| GeneCard | IL6ST     |
| GeneCard | SGCA      |
| GeneCard | HNRNPU    |
| GeneCard | IL16      |
| GeneCard | ACKR1     |
| GeneCard | TPI1      |
| GeneCard | XPNPEP1   |
| GeneCard | PRPF31    |
| GeneCard | HUWE1     |
| GeneCard | NUP133    |
| GeneCard | NOS1AP    |
| GeneCard | ADM       |
| GeneCard | GLS       |
| GeneCard | CAMK2B    |
| GeneCard | ARMS2     |
| GeneCard | CXCR2     |
| GeneCard | NDUFB3    |
| GeneCard | THBS1     |
| GeneCard | TXN       |
| GeneCard | SNAI2     |
| GeneCard | NDUFA10   |
| GeneCard | CYFIP2    |
| GeneCard | PGF       |
| GeneCard | CTSA      |
| GeneCard | ALOX5AP   |
| GeneCard | NUP205    |
| GeneCard | SPG21     |
| GeneCard | RARB      |
| GeneCard | GNRH1     |
| GeneCard | MIR424    |
| GeneCard | RALGPS2   |
| GeneCard | CTSF      |
| GeneCard | CLUAP1    |
| GeneCard | TMEM119   |
| GeneCard | RHOA      |
| GeneCard | SYN1      |
| GeneCard | CD163     |
| GeneCard | GDF5      |

|          |          |
|----------|----------|
| GeneCard | FUT2     |
| GeneCard | SGCB     |
| GeneCard | SEMA4G   |
| GeneCard | AKT3     |
| GeneCard | PRKCB    |
| GeneCard | ERCC3    |
| GeneCard | CYP11A1  |
| GeneCard | MIR206   |
| GeneCard | HMBS     |
| GeneCard | TNFSF10  |
| GeneCard | HERC2    |
| GeneCard | ATP5F1A  |
| GeneCard | FOXO3    |
| GeneCard | ABCC9    |
| GeneCard | GALR2    |
| GeneCard | TGFA     |
| GeneCard | KMT2C    |
| GeneCard | TNNI3K   |
| GeneCard | FLOT2    |
| GeneCard | MEG3     |
| GeneCard | SLC10A2  |
| GeneCard | SPTBN2   |
| GeneCard | CNP      |
| GeneCard | AGA      |
| GeneCard | MIR99A   |
| GeneCard | DHX30    |
| GeneCard | ETS1     |
| GeneCard | A2ML1    |
| GeneCard | PDE4A    |
| GeneCard | VKORC1   |
| GeneCard | NMNAT1   |
| GeneCard | BHLHB9   |
| GeneCard | DDOST    |
| GeneCard | NTS      |
| GeneCard | BCL2L2   |
| GeneCard | BAP1     |
| GeneCard | TWIST1   |
| GeneCard | MECOM    |
| GeneCard | ATXN10   |
| GeneCard | PDHA1    |
| GeneCard | LORICRIN |
| GeneCard | OPA3     |
| GeneCard | WRN      |
| GeneCard | MT-TL2   |
| GeneCard | PPP2R2B  |
| GeneCard | ATP1A2   |
| GeneCard | QRICH1   |
| GeneCard | ATP5F1D  |
| GeneCard | TUBB2B   |
| GeneCard | IL11     |
| GeneCard | CDKN3    |
| GeneCard | KCNB1    |
| GeneCard | CYB5A    |
| GeneCard | LRPPRC   |
| GeneCard | HDAC2    |
| GeneCard | GALK1    |
| GeneCard | CD244    |
| GeneCard | MTRFR    |

|          |              |
|----------|--------------|
| GeneCard | TCOF1        |
| GeneCard | DAOA         |
| GeneCard | UBA1         |
| GeneCard | TCAP         |
| GeneCard | SCGB1A1      |
| GeneCard | MIR335       |
| GeneCard | TRAPPC9      |
| GeneCard | ATRIP        |
| GeneCard | HSPA9        |
| GeneCard | IL19         |
| GeneCard | MIRLET7B     |
| GeneCard | APOC2        |
| GeneCard | HPS1         |
| GeneCard | VCAN         |
| GeneCard | RRAS2        |
| GeneCard | GOSR2        |
| GeneCard | TREM1        |
| GeneCard | IL1RAPL2     |
| GeneCard | CACNB2       |
| GeneCard | MIR30B       |
| GeneCard | TENT5A       |
| GeneCard | CDK8         |
| GeneCard | PROC         |
| GeneCard | P3H1         |
| GeneCard | HAX1         |
| GeneCard | EPHA1        |
| GeneCard | NFIB         |
| GeneCard | KIF1C        |
| GeneCard | NFKB2        |
| GeneCard | FOXO1        |
| GeneCard | SMC3         |
| GeneCard | SHOC2        |
| GeneCard | GDI1         |
| GeneCard | HDAC4        |
| GeneCard | ABCG2        |
| GeneCard | ASS1         |
| GeneCard | GDF2         |
| GeneCard | SLC2A10      |
| GeneCard | TBCK         |
| GeneCard | MTHFD1       |
| GeneCard | CEP63        |
| GeneCard | KRIT1        |
| GeneCard | LOC108663996 |
| GeneCard | PIEZO1       |
| GeneCard | GJB6         |
| GeneCard | S100A12      |
| GeneCard | IL18R1       |
| GeneCard | CALM3        |
| GeneCard | MIR139       |
| GeneCard | POU5F1       |
| GeneCard | CASK         |
| GeneCard | MT-TW        |
| GeneCard | HOXD13       |
| GeneCard | LOC110806262 |
| GeneCard | YWHAE        |
| GeneCard | PRPF8        |
| GeneCard | SAMHD1       |
| GeneCard | PREPL        |

|          |           |
|----------|-----------|
| GeneCard | MSX1      |
| GeneCard | KRT19     |
| GeneCard | GAST      |
| GeneCard | CDON      |
| GeneCard | C1QA      |
| GeneCard | OGDH      |
| GeneCard | ITGA8     |
| GeneCard | CREB3L1   |
| GeneCard | EPHX1     |
| GeneCard | MAP3K7    |
| GeneCard | GHSR      |
| GeneCard | AHR       |
| GeneCard | NR1H2     |
| GeneCard | ABCA12    |
| GeneCard | HAR1A     |
| GeneCard | AP2M1     |
| GeneCard | APRT      |
| GeneCard | TRAF3IP2  |
| GeneCard | ALDH5A1   |
| GeneCard | RTN4R     |
| GeneCard | GC        |
| GeneCard | CRAT      |
| GeneCard | ODAD3     |
| GeneCard | ASCC1     |
| GeneCard | MIR181A2  |
| GeneCard | LINC01080 |
| GeneCard | AHDC1     |
| GeneCard | HESX1     |
| GeneCard | NDUFB11   |
| GeneCard | NUP85     |
| GeneCard | NIPBL     |
| GeneCard | SOS2      |
| GeneCard | SEC23B    |
| GeneCard | MIR16-1   |
| GeneCard | GLRB      |
| GeneCard | NUP93     |
| GeneCard | TGM6      |
| GeneCard | CYP3A5    |
| GeneCard | SNRNP200  |
| GeneCard | CTSG      |
| GeneCard | ITGAL     |
| GeneCard | COX6B1    |
| GeneCard | UGT1A8    |
| GeneCard | PAX5      |
| GeneCard | CSF3R     |
| GeneCard | DEFB4A    |
| GeneCard | ACTG2     |
| GeneCard | CFL2      |
| GeneCard | LRP4      |
| GeneCard | TRPM7     |
| GeneCard | GJA5      |
| GeneCard | FTH1      |
| GeneCard | TFAP2A    |
| GeneCard | FANCC     |
| GeneCard | SCT       |
| GeneCard | GALE      |
| GeneCard | DLG3      |
| GeneCard | AGK       |

|          |           |
|----------|-----------|
| GeneCard | PPBP      |
| GeneCard | GABRB2    |
| GeneCard | SLC11A2   |
| GeneCard | KIFBP     |
| GeneCard | CD81      |
| GeneCard | LINC01616 |
| GeneCard | RAC2      |
| GeneCard | AKAP9     |
| GeneCard | ITGAX     |
| GeneCard | GABRA1    |
| GeneCard | CAPN10    |
| GeneCard | MALAT1    |
| GeneCard | KLHDC8B   |
| GeneCard | FGF10     |
| GeneCard | HADH      |
| GeneCard | SEPTIN9   |
| GeneCard | FOXE1     |
| GeneCard | CXCL1     |
| GeneCard | P2RX7     |
| GeneCard | MMP7      |
| GeneCard | LDLRAP1   |
| GeneCard | NDUFA12   |
| GeneCard | LONP1     |
| GeneCard | CASP2     |
| GeneCard | RPS19     |
| GeneCard | RAPSN     |
| GeneCard | NUP160    |
| GeneCard | MC1R      |
| GeneCard | FA2H      |
| GeneCard | WNT10A    |
| GeneCard | TRAPPC2L  |
| GeneCard | CD59      |
| GeneCard | EPHX2     |
| GeneCard | COL9A1    |
| GeneCard | STX11     |
| GeneCard | OCLN      |
| GeneCard | MYPN      |
| GeneCard | POSTN     |
| GeneCard | MGMT      |
| GeneCard | GATAD2B   |
| GeneCard | KCNN2     |
| GeneCard | LINC01772 |
| GeneCard | PIP       |
| GeneCard | FDPS      |
| GeneCard | SOD3      |
| GeneCard | MT-TS2    |
| GeneCard | NQO2      |
| GeneCard | PLCG1     |
| GeneCard | LIMK1     |
| GeneCard | EFEMP1    |
| GeneCard | FARSA     |
| GeneCard | RNASEH2A  |
| GeneCard | MASP2     |
| GeneCard | PTGIS     |
| GeneCard | HAR1B     |
| GeneCard | GNAO1     |
| GeneCard | SMARCC2   |
| GeneCard | TXNRD2    |

|          |          |
|----------|----------|
| GeneCard | ERLIN2   |
| GeneCard | STIM1    |
| GeneCard | PHB      |
| GeneCard | PAK3     |
| GeneCard | PLAUR    |
| GeneCard | NDUFA9   |
| GeneCard | ADRB1    |
| GeneCard | CYLD     |
| GeneCard | IL18RAP  |
| GeneCard | CXCL9    |
| GeneCard | CCR7     |
| GeneCard | APOA4    |
| GeneCard | NEAT1    |
| GeneCard | CSNK2B   |
| GeneCard | RNASEH2C |
| GeneCard | FHIT     |
| GeneCard | UBD      |
| GeneCard | AP4S1    |
| GeneCard | FSHR     |
| GeneCard | PTX3     |
| GeneCard | CCDC115  |
| GeneCard | STX1B    |
| GeneCard | XRCC2    |
| GeneCard | NDUFC2   |
| GeneCard | EGR1     |
| GeneCard | RAB8A    |
| GeneCard | TINF2    |
| GeneCard | HNRNPH2  |
| GeneCard | PITX3    |
| GeneCard | INPP5D   |
| GeneCard | CYP1A2   |
| GeneCard | FGF1     |
| GeneCard | CCL20    |
| GeneCard | KRT10    |
| GeneCard | NLRC4    |
| GeneCard | MIR511   |
| GeneCard | NOD1     |
| GeneCard | FBXL4    |
| GeneCard | WNT4     |
| GeneCard | OLIG2    |
| GeneCard | NAA10    |
| GeneCard | SOCS3    |
| GeneCard | CRADD    |
| GeneCard | MICB     |
| GeneCard | PPP6R2   |
| GeneCard | ELP1     |
| GeneCard | PPP2R1A  |
| GeneCard | NTF4     |
| GeneCard | APEX1    |
| GeneCard | PPOX     |
| GeneCard | SETD1A   |
| GeneCard | VPS11    |
| GeneCard | CFAP418  |
| GeneCard | ZNF292   |
| GeneCard | CTNND2   |
| GeneCard | CANX     |
| GeneCard | RBFOX1   |
| GeneCard | SDC1     |

|          |          |
|----------|----------|
| GeneCard | WNT5A    |
| GeneCard | TLR6     |
| GeneCard | VAC14    |
| GeneCard | MSTN     |
| GeneCard | TRAF6    |
| GeneCard | SLC6A5   |
| GeneCard | PPP1CB   |
| GeneCard | TRPM3    |
| GeneCard | CEBPA    |
| GeneCard | AP3B1    |
| GeneCard | MIR193B  |
| GeneCard | PRND     |
| GeneCard | ALAD     |
| GeneCard | NDUFB8   |
| GeneCard | STAT2    |
| GeneCard | HMGA1    |
| GeneCard | TTPA     |
| GeneCard | NARS2    |
| GeneCard | ARC      |
| GeneCard | TP73     |
| GeneCard | MIR338   |
| GeneCard | WDR26    |
| GeneCard | SLC12A2  |
| GeneCard | MSMB     |
| GeneCard | CYB5R3   |
| GeneCard | CDK5RAP2 |
| GeneCard | MT-RNR2  |
| GeneCard | CD69     |
| GeneCard | HSPB2    |
| GeneCard | NEUROD1  |
| GeneCard | TCN2     |
| GeneCard | HSD17B4  |
| GeneCard | CDC25A   |
| GeneCard | CNBP     |
| GeneCard | SLC2A4   |
| GeneCard | OCA2     |
| GeneCard | CNGB1    |
| GeneCard | DPP6     |
| GeneCard | AMPD1    |
| GeneCard | KIF3A    |
| GeneCard | IRF4     |
| GeneCard | SMAD7    |
| GeneCard | KCNE3    |
| GeneCard | ABCB7    |
| GeneCard | DHCR7    |
| GeneCard | LRP1-AS  |
| GeneCard | PGK1     |
| GeneCard | NOP56    |
| GeneCard | PCNA     |
| GeneCard | RBPJ     |
| GeneCard | WNT3     |
| GeneCard | FAN1     |
| GeneCard | ACO1     |
| GeneCard | ARF1     |
| GeneCard | GABRB3   |
| GeneCard | DHFR     |
| GeneCard | CALM2    |
| GeneCard | UCP2     |

|          |          |
|----------|----------|
| GeneCard | POMGNT2  |
| GeneCard | ATP12A   |
| GeneCard | FASTKD2  |
| GeneCard | MIR100   |
| GeneCard | MT-TQ    |
| GeneCard | MEGF10   |
| GeneCard | TYK2     |
| GeneCard | RGR      |
| GeneCard | PRPF3    |
| GeneCard | ATAD1    |
| GeneCard | IGFBP2   |
| GeneCard | SUCLA2   |
| GeneCard | SYN2     |
| GeneCard | MIR326   |
| GeneCard | EZR      |
| GeneCard | MX1      |
| GeneCard | ETFA     |
| GeneCard | GRIK2    |
| GeneCard | GLI1     |
| GeneCard | BMPR1B   |
| GeneCard | RAB7B    |
| GeneCard | TRIM21   |
| GeneCard | BLOC1S1  |
| GeneCard | MIR212   |
| GeneCard | PRR12    |
| GeneCard | PDE6G    |
| GeneCard | WIPF1    |
| GeneCard | MIR193A  |
| GeneCard | PLTP     |
| GeneCard | FOXP2    |
| GeneCard | BMP7     |
| GeneCard | DRD5     |
| GeneCard | EIF2B1   |
| GeneCard | IRF7     |
| GeneCard | SNHG3    |
| GeneCard | ANK1     |
| GeneCard | KCNC3    |
| GeneCard | TIMM8A   |
| GeneCard | RPS10    |
| GeneCard | ABCG1    |
| GeneCard | CAMP     |
| GeneCard | DNAAF2   |
| GeneCard | UCP3     |
| GeneCard | C11orf65 |
| GeneCard | SUFU     |
| GeneCard | MT-RNR1  |
| GeneCard | MIR33A   |
| GeneCard | HAVCR2   |
| GeneCard | MYT1L    |
| GeneCard | OXT      |
| GeneCard | VTN      |
| GeneCard | TPH2     |
| GeneCard | TDGF1    |
| GeneCard | EMC1     |
| GeneCard | LIF      |
| GeneCard | MT-TN    |
| GeneCard | MRPS34   |
| GeneCard | IFNAR1   |



|          |          |
|----------|----------|
| GeneCard | USH1G    |
| GeneCard | FTSJ1    |
| GeneCard | LIPE     |
| GeneCard | RPL18    |
| GeneCard | SMS      |
| GeneCard | CTSC     |
| GeneCard | ATP6V1B1 |
| GeneCard | SLCO2A1  |
| GeneCard | WASF1    |
| GeneCard | CHRNE    |
| GeneCard | VAMP2    |
| GeneCard | CHRNA2   |
| GeneCard | NR1I2    |
| GeneCard | TBR1     |
| GeneCard | HSPA1L   |
| GeneCard | TRMT10C  |
| GeneCard | ANTXR1   |
| GeneCard | F2R      |
| GeneCard | PSNP3    |
| GeneCard | TYRP1    |
| GeneCard | CCL26    |
| GeneCard | ERG      |
| GeneCard | CX3CL1   |
| GeneCard | SF3B4    |
| GeneCard | SERPING1 |
| GeneCard | ODC1     |
| GeneCard | SACS     |
| GeneCard | SOX3     |
| GeneCard | AHCY     |
| GeneCard | PALS1    |
| GeneCard | MIR455   |
| GeneCard | LTBP2    |
| GeneCard | MIRLET7C |
| GeneCard | GPNMB    |
| GeneCard | MT-TI    |
| GeneCard | CS       |
| GeneCard | PLCB4    |
| GeneCard | DCX      |
| GeneCard | TAGAP    |
| GeneCard | KEAP1    |
| GeneCard | RAB11A   |
| GeneCard | RPL11    |
| GeneCard | GRP      |
| GeneCard | TECPR2   |
| GeneCard | LYST     |
| GeneCard | ZNF408   |
| GeneCard | SRD5A2   |
| GeneCard | MARK3    |
| GeneCard | PSNP2    |
| GeneCard | HDAC1    |
| GeneCard | CTNNA1   |
| GeneCard | PEPD     |
| GeneCard | SPRY4    |
| GeneCard | MIP      |
| GeneCard | PTPN1    |
| GeneCard | PIK3CG   |
| GeneCard | PAPPA    |
| GeneCard | DIO2     |

|          |          |
|----------|----------|
| GeneCard | MLH3     |
| GeneCard | UFD1     |
| GeneCard | DEFB1    |
| GeneCard | TACO1    |
| GeneCard | LHCGR    |
| GeneCard | HAP1     |
| GeneCard | ADH1B    |
| GeneCard | MIR659   |
| GeneCard | KRT20    |
| GeneCard | C12orf57 |
| GeneCard | COQ8A    |
| GeneCard | WNT3A    |
| GeneCard | TGFBI    |
| GeneCard | ANXA1    |
| GeneCard | GNAI2    |
| GeneCard | FECH     |
| GeneCard | PADI4    |
| GeneCard | ALPP     |
| GeneCard | MAGED2   |
| GeneCard | ACTN1    |
| GeneCard | RASA1    |
| GeneCard | ENTPD1   |
| GeneCard | SREBF2   |
| GeneCard | AOC3     |
| GeneCard | COX15    |
| GeneCard | SYT1     |
| GeneCard | TRPM1    |
| GeneCard | CDK2     |
| GeneCard | MYL2     |
| GeneCard | C1QB     |
| GeneCard | ARHGEF9  |
| GeneCard | RARA     |
| GeneCard | TANC2    |
| GeneCard | NDUFA2   |
| GeneCard | MMP19    |
| GeneCard | DLL4     |
| GeneCard | VSX2     |
| GeneCard | RPS6KB1  |
| GeneCard | EFTUD2   |
| GeneCard | RSPH4A   |
| GeneCard | CPLX1    |
| GeneCard | CSRP3    |
| GeneCard | TRH      |
| GeneCard | CHRM3    |
| GeneCard | BSG      |
| GeneCard | PRRT2    |
| GeneCard | PRPF6    |
| GeneCard | LGII     |
| GeneCard | NCR1     |
| GeneCard | DLG5     |
| GeneCard | CGA      |
| GeneCard | MIR324   |
| GeneCard | MYO1E    |
| GeneCard | ADAMTSL1 |
| GeneCard | DLG1     |
| GeneCard | VPS33B   |
| GeneCard | EPG5     |
| GeneCard | TBL1XR1  |

|          |           |
|----------|-----------|
| GeneCard | MYH10     |
| GeneCard | ALDOB     |
| GeneCard | TKT       |
| GeneCard | TNFRSF10A |
| GeneCard | ADRB3     |
| GeneCard | POLD1     |
| GeneCard | DPAGT1    |
| GeneCard | NME8      |
| GeneCard | LPP       |
| GeneCard | NDUFA11   |
| GeneCard | MIR135A1  |
| GeneCard | ODAD2     |
| GeneCard | EFEMP2    |
| GeneCard | IRF6      |
| GeneCard | CEP78     |
| GeneCard | DNMBP     |
| GeneCard | TTBK2     |
| GeneCard | HBEGF     |
| GeneCard | SNRPN     |
| GeneCard | CERT1     |
| GeneCard | NYX       |
| GeneCard | GET1      |
| GeneCard | TRIM8     |
| GeneCard | TNC       |
| GeneCard | GRB2      |
| GeneCard | ZNF365    |
| GeneCard | DSC3      |
| GeneCard | IGH       |
| GeneCard | RPS26     |
| GeneCard | DHDDS     |
| GeneCard | MS4A4A    |
| GeneCard | SLC25A20  |
| GeneCard | NKX2-3    |
| GeneCard | SGCG      |
| GeneCard | BANK1     |
| GeneCard | NT5E      |
| GeneCard | PDCD10    |
| GeneCard | RP9       |
| GeneCard | MSX2      |
| GeneCard | EEF2      |
| GeneCard | THRA      |
| GeneCard | SMARCE1   |
| GeneCard | AKAP10    |
| GeneCard | XYLT2     |
| GeneCard | TJP1      |
| GeneCard | OPRM1     |
| GeneCard | POR       |
| GeneCard | ZNF148    |
| GeneCard | BDKRB2    |
| GeneCard | SNRNP70   |
| GeneCard | ATG5      |
| GeneCard | YY1       |
| GeneCard | PML       |
| GeneCard | MIRLET7E  |
| GeneCard | FAM161A   |
| GeneCard | DDR2      |
| GeneCard | SIX1      |
| GeneCard | TMCO1     |

|          |             |
|----------|-------------|
| GeneCard | PC          |
| GeneCard | UQCRFS1     |
| GeneCard | MIR331      |
| GeneCard | CISD2       |
| GeneCard | GFPT1       |
| GeneCard | HDAC5       |
| GeneCard | RNASEL      |
| GeneCard | CHST3       |
| GeneCard | CRHR1       |
| GeneCard | NEDD4L      |
| GeneCard | RPSA        |
| GeneCard | PHF8        |
| GeneCard | P4HB        |
| GeneCard | SRF         |
| GeneCard | MCCC1       |
| GeneCard | PSMA6       |
| GeneCard | LCK         |
| GeneCard | PDP1        |
| GeneCard | PVT1        |
| GeneCard | SLC9A3R1    |
| GeneCard | HABP2       |
| GeneCard | NR0B2       |
| GeneCard | ECHS1       |
| GeneCard | CLOCK       |
| GeneCard | TRDN        |
| GeneCard | AIMP2       |
| GeneCard | MIR96       |
| GeneCard | MLN         |
| GeneCard | KCNE2       |
| GeneCard | RORA        |
| GeneCard | ADORA1      |
| GeneCard | LCT         |
| GeneCard | TRIP12      |
| GeneCard | GLIS3       |
| GeneCard | VPS33A      |
| GeneCard | OTOF        |
| GeneCard | ZFHX3       |
| GeneCard | THBS4       |
| GeneCard | ATP8A2      |
| GeneCard | BIRC5       |
| GeneCard | CTSH        |
| GeneCard | MLYCD       |
| GeneCard | IBSP        |
| GeneCard | KRT83       |
| GeneCard | CDK6        |
| GeneCard | ATP5F1E     |
| GeneCard | JAZF1       |
| GeneCard | ATRIP-TREX1 |
| GeneCard | CTSL        |
| GeneCard | GOLM1       |
| GeneCard | COL4A6      |
| GeneCard | RPL35A      |
| GeneCard | FERMT3      |
| GeneCard | FANCA       |
| GeneCard | MIR181B1    |
| GeneCard | ACO2        |
| GeneCard | HPGD        |
| GeneCard | EYA4        |

|          |           |
|----------|-----------|
| GeneCard | ARL2BP    |
| GeneCard | MIR103A1  |
| GeneCard | TUBB6     |
| GeneCard | PSMA5     |
| GeneCard | MIR375    |
| GeneCard | PIKFYVE   |
| GeneCard | SEC24C    |
| GeneCard | KIDINS220 |
| GeneCard | ACSL4     |
| GeneCard | AMPH      |
| GeneCard | TOP1      |
| GeneCard | GPX3      |
| GeneCard | DGAT1     |
| GeneCard | CHRNA1    |
| GeneCard | MIPEP     |
| GeneCard | APBA3     |
| GeneCard | MIR106A   |
| GeneCard | PPP2CA    |
| GeneCard | CYP11B1   |
| GeneCard | FDXR      |
| GeneCard | WNT7A     |
| GeneCard | MYORG     |
| GeneCard | ARVCF     |
| GeneCard | CYGB      |
| GeneCard | PTPRJ     |
| GeneCard | HHEX      |
| GeneCard | SALL4     |
| GeneCard | DDX41     |
| GeneCard | COX8A     |
| GeneCard | UQCRC2    |
| GeneCard | MAT2A     |
| GeneCard | TMEM230   |
| GeneCard | CKM       |
| GeneCard | NR2F2     |
| GeneCard | DNAJB6    |
| GeneCard | IFNAR2    |
| GeneCard | PROCR     |
| GeneCard | EIF4E     |
| GeneCard | GTPBP1    |
| GeneCard | ASL       |
| GeneCard | STMN2     |
| GeneCard | MIR26A1   |
| GeneCard | CD247     |
| GeneCard | PTGER4    |
| GeneCard | FIP1L1    |
| GeneCard | EPHB2     |
| GeneCard | PTPRO     |
| GeneCard | NGLY1     |
| GeneCard | ATF2      |
| GeneCard | SHC1      |
| GeneCard | HSD11B1   |
| GeneCard | PQBP1     |
| GeneCard | IGHM      |
| GeneCard | FABP3     |
| GeneCard | CISH      |
| GeneCard | MIR590    |
| GeneCard | CYP2A6    |
| GeneCard | NLGN4X    |

|          |         |
|----------|---------|
| GeneCard | OAT     |
| GeneCard | BCKDK   |
| GeneCard | CUL3    |
| GeneCard | SPART   |
| GeneCard | MMADHC  |
| GeneCard | APPL1   |
| GeneCard | USF1    |
| GeneCard | EXOSC9  |
| GeneCard | ALDH7A1 |
| GeneCard | PSMB4   |
| GeneCard | MS4A1   |
| GeneCard | UQCRB   |
| GeneCard | PNP     |
| GeneCard | PER3    |
| GeneCard | GNAT2   |
| GeneCard | SOX5    |
| GeneCard | AMBP    |
| GeneCard | MALT1   |
| GeneCard | HRH1    |
| GeneCard | CNNM2   |
| GeneCard | PTK2B   |
| GeneCard | SSB     |
| GeneCard | MIR377  |
| GeneCard | CAPN5   |
| GeneCard | CD9     |
| GeneCard | ITIH4   |
| GeneCard | STAC3   |
| GeneCard | ERVW-1  |
| GeneCard | GABBR2  |
| GeneCard | KLF4    |
| GeneCard | PSMC4   |
| GeneCard | SUMO1   |
| GeneCard | DDB2    |
| GeneCard | SHANK2  |
| GeneCard | TRIO    |
| GeneCard | MMAB    |
| GeneCard | ATR     |
| GeneCard | RPS24   |
| GeneCard | PCBD1   |
| GeneCard | F2RL1   |
| GeneCard | NDUFB10 |
| GeneCard | FSCN2   |
| GeneCard | GTF2H5  |
| GeneCard | WNT10B  |
| GeneCard | HLA-DMA |
| GeneCard | MFN1    |
| GeneCard | AURKA   |
| GeneCard | ITGA6   |
| GeneCard | QDPR    |
| GeneCard | CARMIL2 |
| GeneCard | SLC8A1  |
| GeneCard | KRTCAP3 |
| GeneCard | HIP1    |
| GeneCard | PHF1    |
| GeneCard | CLIP2   |
| GeneCard | DHX16   |
| GeneCard | KIF3B   |
| GeneCard | KAT5    |

|          |          |
|----------|----------|
| GeneCard | MIR101-1 |
| GeneCard | SERPINA6 |
| GeneCard | LAMA1    |
| GeneCard | KRT9     |
| GeneCard | RPS29    |
| GeneCard | SIRT3    |
| GeneCard | TLR8     |
| GeneCard | BAK1     |
| GeneCard | PDE6D    |
| GeneCard | PDXX     |
| GeneCard | RAD50    |
| GeneCard | KLF6     |
| GeneCard | MUC6     |
| GeneCard | INPP5B   |
| GeneCard | NRG3     |
| GeneCard | ZFPM2    |
| GeneCard | WAC      |
| GeneCard | SYT2     |
| GeneCard | NID1     |
| GeneCard | CITED2   |
| GeneCard | ACTL6B   |
| GeneCard | BCL2L11  |
| GeneCard | OXA1L    |
| GeneCard | MRPS22   |
| GeneCard | FAH      |
| GeneCard | THAP1    |
| GeneCard | FBXO38   |
| GeneCard | MCL1     |
| GeneCard | IL1RL1   |
| GeneCard | BRAT1    |
| GeneCard | MIR30D   |
| GeneCard | CACNA1B  |
| GeneCard | YWHAG    |
| GeneCard | H3-3A    |
| GeneCard | LDHB     |
| GeneCard | MAP3K1   |
| GeneCard | TRPC4AP  |
| GeneCard | NDUFAF4  |
| GeneCard | LMOD3    |
| GeneCard | SLC25A12 |
| GeneCard | CPT1A    |
| GeneCard | PPARD    |
| GeneCard | GMPPA    |
| GeneCard | UGT1A9   |
| GeneCard | RBFOX3   |
| GeneCard | GPR37    |
| GeneCard | KRT4     |
| GeneCard | CXCL2    |
| GeneCard | FBXW7    |
| GeneCard | TRAF1    |
| GeneCard | SIN3A    |
| GeneCard | SPTB     |
| GeneCard | ANXA2    |
| GeneCard | CALCR    |
| GeneCard | FANCM    |
| GeneCard | CRLF2    |
| GeneCard | MLC1     |
| GeneCard | SLC1A1   |

|          |          |
|----------|----------|
| GeneCard | HSPA2    |
| GeneCard | BIRC3    |
| GeneCard | FDX1     |
| GeneCard | MLX      |
| GeneCard | POLR2A   |
| GeneCard | PYY      |
| GeneCard | TBCD     |
| GeneCard | ETFB     |
| GeneCard | HLA-DQA2 |
| GeneCard | MIR191   |
| GeneCard | CELF1    |
| GeneCard | ETHE1    |
| GeneCard | STOX1    |
| GeneCard | IL26     |
| GeneCard | SPI1     |
| GeneCard | MAP1LC3A |
| GeneCard | LIPG     |
| GeneCard | TBX3     |
| GeneCard | LACTB    |
| GeneCard | PLS3     |
| GeneCard | TPP2     |
| GeneCard | MIR574   |
| GeneCard | RFX5     |
| GeneCard | TNFSF12  |
| GeneCard | NOP10    |
| GeneCard | UGT1A10  |
| GeneCard | PIIG     |
| GeneCard | PIGQ     |
| GeneCard | CFLAR    |
| GeneCard | RARS2    |
| GeneCard | ATP2A3   |
| GeneCard | GEMIN4   |
| GeneCard | MADD     |
| GeneCard | NBEA     |
| GeneCard | FARS2    |
| GeneCard | CCDC28B  |
| GeneCard | ESCO2    |
| GeneCard | SPHK2    |
| GeneCard | ATP6V1A  |
| GeneCard | HNRNPDL  |
| GeneCard | NSUN2    |
| GeneCard | PRKAA1   |
| GeneCard | ELAVL1   |
| GeneCard | HEY2     |
| GeneCard | GEMIN2   |
| GeneCard | LOXL1    |
| GeneCard | TECTA    |
| GeneCard | KRT74    |
| GeneCard | ALOX12   |
| GeneCard | LYZ      |
| GeneCard | DAB1     |
| GeneCard | NEDD4    |
| GeneCard | UCP1     |
| GeneCard | TIMMDC1  |
| GeneCard | RPS17    |
| GeneCard | MIR148B  |
| GeneCard | CHD3     |
| GeneCard | HMGA2    |



|          |          |
|----------|----------|
| GeneCard | CFL1     |
| GeneCard | WASHC4   |
| GeneCard | ADAM9    |
| GeneCard | HMCN1    |
| GeneCard | HOXD10   |
| GeneCard | KCNN3    |
| GeneCard | GHRH     |
| GeneCard | APLN     |
| GeneCard | AXL      |
| GeneCard | NKX2-6   |
| GeneCard | PITX1    |
| GeneCard | ANGPT1   |
| GeneCard | SLC9A9   |
| GeneCard | SLC5A5   |
| GeneCard | RNLS     |
| GeneCard | KDSR     |
| GeneCard | CFAP43   |
| GeneCard | ATP6AP2  |
| GeneCard | PER2     |
| GeneCard | PHGDH    |
| GeneCard | PTK2     |
| GeneCard | CEL      |
| GeneCard | DMBT1    |
| GeneCard | ADRA2A   |
| GeneCard | MIR138-1 |
| GeneCard | RIPK2    |
| GeneCard | TBX22    |
| GeneCard | ZMIZ1    |
| GeneCard | GTPBP3   |
| GeneCard | PNPO     |
| GeneCard | CNTN2    |
| GeneCard | HIVEP2   |
| GeneCard | DEAF1    |
| GeneCard | PGM3     |
| GeneCard | CA12     |
| GeneCard | DISC2    |
| GeneCard | EEF1A1   |
| GeneCard | PPP1R1B  |
| GeneCard | ACKR2    |
| GeneCard | HSD17B3  |
| GeneCard | RBM8A    |
| GeneCard | SDHAF2   |
| GeneCard | PDGFA    |
| GeneCard | MOBP     |
| GeneCard | TACR1    |
| GeneCard | ORAI1    |
| GeneCard | TBX18    |
| GeneCard | YME1L1   |
| GeneCard | NEUROG3  |
| GeneCard | RPL15    |
| GeneCard | SYT11    |
| GeneCard | TAT      |
| GeneCard | SPRY2    |
| GeneCard | GABRA2   |
| GeneCard | TPPP3    |
| GeneCard | ISL1     |
| GeneCard | LHX1     |
| GeneCard | OSM      |

|          |           |
|----------|-----------|
| GeneCard | WNT2B     |
| GeneCard | RPS27     |
| GeneCard | PDE6C     |
| GeneCard | POLR3B    |
| GeneCard | MS4A6E    |
| GeneCard | HDC       |
| GeneCard | MFF       |
| GeneCard | FKBP5     |
| GeneCard | C5AR1     |
| GeneCard | FEN1      |
| GeneCard | SIX5      |
| GeneCard | DDHD2     |
| GeneCard | MIR27B    |
| GeneCard | HTR6      |
| GeneCard | CRYGD     |
| GeneCard | KRT86     |
| GeneCard | STAG3     |
| GeneCard | JAM2      |
| GeneCard | PLD1      |
| GeneCard | ALG2      |
| GeneCard | MRAP      |
| GeneCard | RPL10     |
| GeneCard | ARHGEF2   |
| GeneCard | PCSK1     |
| GeneCard | AICDA     |
| GeneCard | COL13A1   |
| GeneCard | TGM3      |
| GeneCard | HSPA1B    |
| GeneCard | ACP1      |
| GeneCard | MIR199B   |
| GeneCard | GRIN3B    |
| GeneCard | TBX2      |
| GeneCard | RPS28     |
| GeneCard | DEGS1     |
| GeneCard | EIF4EBP1  |
| GeneCard | NFATC1    |
| GeneCard | CENPF     |
| GeneCard | SYNE2     |
| GeneCard | LOXHD1    |
| GeneCard | ECE2      |
| GeneCard | FBL       |
| GeneCard | TALDO1    |
| GeneCard | XRCC6     |
| GeneCard | KDM1A     |
| GeneCard | WNT2      |
| GeneCard | SEPTIN5   |
| GeneCard | XPR1      |
| GeneCard | RELB      |
| GeneCard | JMJD1C    |
| GeneCard | RPL26     |
| GeneCard | TNFRSF10B |
| GeneCard | GCKR      |
| GeneCard | MS4A6A    |
| GeneCard | LINGO1    |
| GeneCard | EPHA3     |
| GeneCard | DAXX      |
| GeneCard | MGME1     |
| GeneCard | XPC       |

|          |               |
|----------|---------------|
| GeneCard | UGT1A         |
| GeneCard | GNPAT         |
| GeneCard | BLOC1S6       |
| GeneCard | SCD           |
| GeneCard | ARMC9         |
| GeneCard | FASN          |
| GeneCard | MBNL1         |
| GeneCard | PLEK          |
| GeneCard | RXYLT1        |
| GeneCard | CSF2RA        |
| GeneCard | RSPH1         |
| GeneCard | PRDX2         |
| GeneCard | NT5C2         |
| GeneCard | BCAP31        |
| GeneCard | APCS          |
| GeneCard | FIS1          |
| GeneCard | ARID2         |
| GeneCard | KCNJ8         |
| GeneCard | FXYD2         |
| GeneCard | NDUFC2-KCTD14 |
| GeneCard | MT-TM         |
| GeneCard | ARHGAP45      |
| GeneCard | ACADS         |
| GeneCard | MCPH1         |
| GeneCard | COX7B         |
| GeneCard | ARNTL         |
| GeneCard | PUS3          |
| GeneCard | TFPI          |
| GeneCard | MIR134        |
| GeneCard | ATP6V0A4      |
| GeneCard | CD1A          |
| GeneCard | SLAMF1        |
| GeneCard | RPL27         |
| GeneCard | RIC3          |
| GeneCard | SUCLG1        |
| GeneCard | MT-TG         |
| GeneCard | MSN           |
| GeneCard | CCL7          |
| GeneCard | CDKN2C        |
| GeneCard | CIZ1          |
| GeneCard | SOX11         |
| GeneCard | CLPB          |
| GeneCard | TBL2          |
| GeneCard | FGF9          |
| GeneCard | CC2D1A        |
| GeneCard | FMN2          |
| GeneCard | MDH2          |
| GeneCard | PPT2          |
| GeneCard | SERPINB1      |
| GeneCard | RPL7          |
| GeneCard | CIT           |
| GeneCard | CENPJ         |
| GeneCard | PDSS2         |
| GeneCard | RPS6          |
| GeneCard | CACNA2D1      |
| GeneCard | LMX1A         |
| GeneCard | S100A7        |
| GeneCard | RSPH3         |

|          |          |
|----------|----------|
| GeneCard | NONO     |
| GeneCard | TRAF2    |
| GeneCard | SLC25A19 |
| GeneCard | DVL3     |
| GeneCard | VSX1     |
| GeneCard | DISP1    |
| GeneCard | PSMC3    |
| GeneCard | UBE2D2   |
| GeneCard | LGALS1   |
| GeneCard | NHP2     |
| GeneCard | DSC1     |
| GeneCard | EIF3F    |
| GeneCard | NME1     |
| GeneCard | PRKCH    |
| GeneCard | RPS20    |
| GeneCard | RUBCN    |
| GeneCard | HTR3A    |
| GeneCard | GRID2    |
| GeneCard | HBS1L    |
| GeneCard | GPX4     |
| GeneCard | CSMD1    |
| GeneCard | HLCS     |
| GeneCard | ORMDL3   |
| GeneCard | PM20D1   |
| GeneCard | KYNU     |
| GeneCard | CKB      |
| GeneCard | PRKCZ    |
| GeneCard | CEP250   |
| GeneCard | PSMA1    |
| GeneCard | TOMM20   |
| GeneCard | IGF2BP2  |
| GeneCard | MARS2    |
| GeneCard | TTC19    |
| GeneCard | PRKRA    |
| GeneCard | TRIP4    |
| GeneCard | HELLS    |
| GeneCard | PSMD12   |
| GeneCard | BANF1    |
| GeneCard | APBB3    |
| GeneCard | NARS1    |
| GeneCard | MIR361   |
| GeneCard | TBXAS1   |
| GeneCard | ADIPOR1  |
| GeneCard | ACSF3    |
| GeneCard | PRKAR1B  |
| GeneCard | NES      |
| GeneCard | RXRA     |
| GeneCard | RARS1    |
| GeneCard | ADAMTS1  |
| GeneCard | SFPQ     |
| GeneCard | PHOX2A   |
| GeneCard | EPHB4    |
| GeneCard | SERPINE2 |
| GeneCard | TLR10    |
| GeneCard | MT-TA    |
| GeneCard | GATD1    |
| GeneCard | GOLPH3   |
| GeneCard | SLC29A1  |

|          |         |
|----------|---------|
| GeneCard | PTCD3   |
| GeneCard | HNRNPL  |
| GeneCard | BST1    |
| GeneCard | EEA1    |
| GeneCard | PDPN    |
| GeneCard | SLC35C1 |
| GeneCard | MAN2A1  |
| GeneCard | ADRA2B  |
| GeneCard | ELAC2   |
| GeneCard | DCHS1   |
| GeneCard | TUBB4B  |
| GeneCard | KLF11   |
| GeneCard | MIR137  |
| GeneCard | ALDH3A2 |
| GeneCard | PPP1R3C |
| GeneCard | PTPRQ   |
| GeneCard | PRKACG  |
| GeneCard | MARCHF6 |
| GeneCard | MYO9A   |
| GeneCard | FGF14   |
| GeneCard | AK2     |
| GeneCard | PCK1    |
| GeneCard | C9      |
| GeneCard | PREP    |
| GeneCard | VAMP1   |
| GeneCard | GOT2    |
| GeneCard | KY      |
| GeneCard | ANKRD55 |
| GeneCard | SAA2    |
| GeneCard | RPS15   |
| GeneCard | FKBP1A  |
| GeneCard | PNKD    |
| GeneCard | CLASP1  |
| GeneCard | TUG1    |
| GeneCard | TUBB1   |
| GeneCard | CDKAL1  |
| GeneCard | RNF19A  |
| GeneCard | MTNR1B  |
| GeneCard | NSD2    |
| GeneCard | TRIP11  |
| GeneCard | ATPAF2  |
| GeneCard | RAB3A   |
| GeneCard | PTS     |
| GeneCard | ABO     |
| GeneCard | GRIP1   |
| GeneCard | FZD3    |
| GeneCard | EEF1B2  |
| GeneCard | CTNND1  |
| GeneCard | WNT9B   |
| GeneCard | E2F1    |
| GeneCard | CHGB    |
| GeneCard | CRKL    |
| GeneCard | GPBAR1  |
| GeneCard | RMDN3   |
| GeneCard | FGF21   |
| GeneCard | DERL1   |
| GeneCard | HNRNPC  |
| GeneCard | PTPN12  |

|          |         |
|----------|---------|
| GeneCard | BAZ1B   |
| GeneCard | TRAF3   |
| GeneCard | RNPC3   |
| GeneCard | ATP5PD  |
| GeneCard | ELAVL4  |
| GeneCard | PPL     |
| GeneCard | MYOM2   |
| GeneCard | AMBN    |
| GeneCard | SULT1A3 |
| GeneCard | KDELR2  |
| GeneCard | GLRX    |
| GeneCard | POU3F4  |
| GeneCard | SGK1    |
| GeneCard | UMPS    |
| GeneCard | PPIB    |
| GeneCard | TCN1    |
| GeneCard | UQCRQ   |
| GeneCard | HMOX2   |
| GeneCard | ATP5PF  |
| GeneCard | GAK     |
| GeneCard | COASY   |
| GeneCard | RPS15A  |
| GeneCard | MAT1A   |
| GeneCard | CCT5    |
| GeneCard | AMPD3   |
| GeneCard | MIR19B1 |
| GeneCard | ADAMTS9 |
| GeneCard | TRIM37  |
| GeneCard | CHN1    |
| GeneCard | TRAP1   |
| GeneCard | INCA1   |
| GeneCard | AP1S1   |
| GeneCard | KLC2    |
| GeneCard | CYC1    |
| GeneCard | FXR1    |
| GeneCard | GPC6    |
| GeneCard | WWC1    |
| GeneCard | DGCR8   |
| GeneCard | MOCS2   |
| GeneCard | DKK3    |
| GeneCard | NDUFA4  |
| GeneCard | SNAI1   |
| GeneCard | FZD5    |
| GeneCard | DDAH2   |
| GeneCard | ITGA7   |
| GeneCard | PUF60   |
| GeneCard | KMO     |
| GeneCard | TLL1    |
| GeneCard | CEBPB   |
| GeneCard | ANPEP   |
| GeneCard | DPYSL5  |
| GeneCard | FBLN1   |
| GeneCard | ATP5PO  |
| GeneCard | KLHL41  |
| GeneCard | CTTN    |
| GeneCard | PMEL    |
| GeneCard | PIBF1   |
| GeneCard | CCNA2   |

|          |         |
|----------|---------|
| GeneCard | SNRPA   |
| GeneCard | COLEC12 |
| GeneCard | ALDH1A1 |
| GeneCard | TAF6    |
| GeneCard | PPIA    |
| GeneCard | ATXN8   |
| GeneCard | CDH11   |
| GeneCard | PTBP1   |
| GeneCard | MIR429  |
| GeneCard | PEMT    |
| GeneCard | FANCG   |
| GeneCard | HSD3B2  |
| GeneCard | RFC2    |
| GeneCard | RAB28   |
| GeneCard | PIK3CB  |
| GeneCard | BAAT    |
| GeneCard | PNLIP   |
| GeneCard | FAM20C  |
| GeneCard | MTMR10  |
| GeneCard | CGB3    |
| GeneCard | IMMT    |
| GeneCard | GAS1    |
| GeneCard | PSMD3   |
| GeneCard | ZNF513  |
| GeneCard | RPL35   |
| GeneCard | ADAMTS5 |
| GeneCard | UBE2D1  |
| GeneCard | SLMAP   |
| GeneCard | CLDN2   |
| GeneCard | IFT57   |
| GeneCard | ALOX15  |
| GeneCard | KCNE5   |
| GeneCard | HSD3B1  |
| GeneCard | TFAP2B  |
| GeneCard | TOP2A   |
| GeneCard | CHRM2   |
| GeneCard | TDP1    |
| GeneCard | YWHAB   |
| GeneCard | RBM10   |
| GeneCard | BLVRB   |
| GeneCard | SLC24A4 |
| GeneCard | DDX39B  |
| GeneCard | ANO3    |
| GeneCard | COL27A1 |
| GeneCard | ABCC4   |
| GeneCard | KRT71   |
| GeneCard | SV2A    |
| GeneCard | CRYBA1  |
| GeneCard | MIR184  |
| GeneCard | RPS7    |
| GeneCard | ATP1B1  |
| GeneCard | SYNPO   |
| GeneCard | ZKSCAN3 |
| GeneCard | CDH13   |
| GeneCard | HRH3    |
| GeneCard | DLK1    |
| GeneCard | KANK2   |
| GeneCard | MAPK12  |

|          |            |
|----------|------------|
| GeneCard | SOAT1      |
| GeneCard | ZNF627     |
| GeneCard | MTAP       |
| GeneCard | SF3B1      |
| GeneCard | SPINT2     |
| GeneCard | CHRNA5     |
| GeneCard | TACR3      |
| GeneCard | CEP57      |
| GeneCard | H2AX       |
| GeneCard | RIN3       |
| GeneCard | WNT7B      |
| GeneCard | G3BP1      |
| GeneCard | KDM5B      |
| GeneCard | PLCD1      |
| GeneCard | TNK1       |
| GeneCard | LEPQTL1    |
| GeneCard | MACF1      |
| GeneCard | CTH        |
| GeneCard | PPP1R3A    |
| GeneCard | SH2B1      |
| GeneCard | TPK1       |
| GeneCard | COL4A2-AS2 |
| GeneCard | ST3GAL3    |
| GeneCard | CCKBR      |
| GeneCard | TP53BP1    |
| GeneCard | PGBD3      |
| GeneCard | PRKAB1     |
| GeneCard | CPOX       |
| GeneCard | PRKDC      |
| GeneCard | AREG       |
| GeneCard | TIMM50     |
| GeneCard | MIR186     |
| GeneCard | ADIPOR2    |
| GeneCard | SIK1       |
| GeneCard | CCRL2      |
| GeneCard | CD1C       |
| GeneCard | PZP        |
| GeneCard | SZT2       |
| GeneCard | PLIN2      |
| GeneCard | CFAP298    |
| GeneCard | CEACAM16   |
| GeneCard | ABHD11     |
| GeneCard | CMA1       |
| GeneCard | IDH3A      |
| GeneCard | PARL       |
| GeneCard | UBE2A      |
| GeneCard | THRIL      |
| GeneCard | TM2D3      |
| GeneCard | MAK        |
| GeneCard | ACY1       |
| GeneCard | INPP5K     |
| GeneCard | OGA        |
| GeneCard | CNR2       |
| GeneCard | FBP1       |
| GeneCard | COG4       |
| GeneCard | POU4F1     |
| GeneCard | CHKB       |
| GeneCard | RAN        |



|          |          |
|----------|----------|
| GeneCard | EFNB1    |
| GeneCard | SLC4A4   |
| GeneCard | CD24     |
| GeneCard | CRYGC    |
| GeneCard | TWIST2   |
| GeneCard | SNX27    |
| GeneCard | PSMA7    |
| GeneCard | IL27     |
| GeneCard | ZC3H14   |
| GeneCard | SH3GL2   |
| GeneCard | MTMR14   |
| GeneCard | NTN1     |
| GeneCard | BLOC1S5  |
| GeneCard | MSRB2    |
| GeneCard | GHRHR    |
| GeneCard | ARIH1    |
| GeneCard | ALDH1A2  |
| GeneCard | CUL1     |
| GeneCard | ATG7     |
| GeneCard | CGB5     |
| GeneCard | DCHS2    |
| GeneCard | HPSE2    |
| GeneCard | SLC46A1  |
| GeneCard | HSP90B1  |
| GeneCard | RPLP0    |
| GeneCard | DYRK1B   |
| GeneCard | SAA4     |
| GeneCard | LRP1B    |
| GeneCard | SNRPD1   |
| GeneCard | MIR198   |
| GeneCard | GRIN3A   |
| GeneCard | DLX3     |
| GeneCard | MTPAP    |
| GeneCard | HLA-DOA  |
| GeneCard | TNFRSF6B |
| GeneCard | CLIP1    |
| GeneCard | SH3KBP1  |
| GeneCard | STK39    |
| GeneCard | SLC39A8  |
| GeneCard | KISS1    |
| GeneCard | PYGB     |
| GeneCard | FRG1     |
| GeneCard | S100A1   |
| GeneCard | GAS6     |
| GeneCard | SPRED1   |
| GeneCard | CPB2     |
| GeneCard | GNAL     |
| GeneCard | TRIM63   |
| GeneCard | MACROD2  |
| GeneCard | XRCC5    |
| GeneCard | GOLGA2   |
| GeneCard | ARHGAP9  |
| GeneCard | NUP88    |
| GeneCard | ABCC1    |
| GeneCard | DNAJB1   |
| GeneCard | MRPS16   |
| GeneCard | SMNDC1   |
| GeneCard | CHMP1A   |

|          |          |
|----------|----------|
| GeneCard | CLDN3    |
| GeneCard | COA5     |
| GeneCard | MFGE8    |
| GeneCard | TTBK1    |
| GeneCard | LSM2     |
| GeneCard | OPCML    |
| GeneCard | PPP3CC   |
| GeneCard | AGBL1    |
| GeneCard | PCSK2    |
| GeneCard | MIR20B   |
| GeneCard | RAB10    |
| GeneCard | ACAT1    |
| GeneCard | CNTN5    |
| GeneCard | RPL31    |
| GeneCard | THY1     |
| GeneCard | KIZ      |
| GeneCard | FGF4     |
| GeneCard | SCYL1    |
| GeneCard | NEDD9    |
| GeneCard | TRIM28   |
| GeneCard | TBC1D8B  |
| GeneCard | CD151    |
| GeneCard | LBP      |
| GeneCard | FAAH     |
| GeneCard | RSPO1    |
| GeneCard | CES1     |
| GeneCard | CHKA     |
| GeneCard | PRPF4    |
| GeneCard | CDR1     |
| GeneCard | TSG101   |
| GeneCard | SLC39A13 |
| GeneCard | IRS4     |
| GeneCard | OMP      |
| GeneCard | UBE2K    |
| GeneCard | GLP1R    |
| GeneCard | PI4KA    |
| GeneCard | SLC25A24 |
| GeneCard | FDFT1    |
| GeneCard | CELF2    |
| GeneCard | SPIB     |
| GeneCard | PRKACB   |
| GeneCard | EBP      |
| GeneCard | STK24    |
| GeneCard | AHSP     |
| GeneCard | DLX5     |
| GeneCard | RAP1A    |
| GeneCard | TSHZ3    |
| GeneCard | CSNK1E   |
| GeneCard | PIGV     |
| GeneCard | MYOG     |
| GeneCard | IQGAP1   |
| GeneCard | GBF1     |
| GeneCard | SLAMF7   |
| GeneCard | NDRG2    |
| GeneCard | EGLN1    |
| GeneCard | SKP1     |
| GeneCard | LIPT1    |
| GeneCard | DRAM2    |

|          |          |
|----------|----------|
| GeneCard | GART     |
| GeneCard | HBD      |
| GeneCard | HTR4     |
| GeneCard | PIGP     |
| GeneCard | RHEB     |
| GeneCard | CAV2     |
| GeneCard | CCDC88C  |
| GeneCard | MINPP1   |
| GeneCard | ETS2     |
| GeneCard | BICRA    |
| GeneCard | BCAM     |
| GeneCard | CORO1A   |
| GeneCard | SIAH1    |
| GeneCard | CCL21    |
| GeneCard | FOXI1    |
| GeneCard | PDE10A   |
| GeneCard | TRAPPC2  |
| GeneCard | ACYP1    |
| GeneCard | PDGFRL   |
| GeneCard | FAM126A  |
| GeneCard | PIDD1    |
| GeneCard | FHL2     |
| GeneCard | HBZ      |
| GeneCard | DPM1     |
| GeneCard | PGAP3    |
| GeneCard | DMXL2    |
| GeneCard | KLHL3    |
| GeneCard | SLC1A4   |
| GeneCard | ABAT     |
| GeneCard | SNRPB    |
| GeneCard | CTHRC1   |
| GeneCard | ITSN1    |
| GeneCard | KRT6A    |
| GeneCard | SERAC1   |
| GeneCard | NTNG1    |
| GeneCard | CD200    |
| GeneCard | RAB29    |
| GeneCard | TFE3     |
| GeneCard | SNX3     |
| GeneCard | DROSHA   |
| GeneCard | PKM      |
| GeneCard | ACTN3    |
| GeneCard | PARD3    |
| GeneCard | ASNS     |
| GeneCard | IKBKE    |
| GeneCard | NUDT1    |
| GeneCard | FANCF    |
| GeneCard | TPPP     |
| GeneCard | RASGRP2  |
| GeneCard | CCS      |
| GeneCard | TTF2     |
| GeneCard | APOBEC3G |
| GeneCard | CSNK2A2  |
| GeneCard | IGHG1    |
| GeneCard | APOM     |
| GeneCard | FMO3     |
| GeneCard | SLC5A2   |
| GeneCard | CBY1     |

|          |          |
|----------|----------|
| GeneCard | AP3D1    |
| GeneCard | TAPBPL   |
| GeneCard | RECK     |
| GeneCard | UBE2N    |
| GeneCard | KRT81    |
| GeneCard | ROBO2    |
| GeneCard | TOE1     |
| GeneCard | HPSE     |
| GeneCard | PSAT1    |
| GeneCard | CEP55    |
| GeneCard | SARS1    |
| GeneCard | YWHAZ    |
| GeneCard | CLDN1    |
| GeneCard | NNMT     |
| GeneCard | AUP1     |
| GeneCard | SCAP     |
| GeneCard | SDR9C7   |
| GeneCard | PSMB1    |
| GeneCard | RSRC1    |
| GeneCard | CSK      |
| GeneCard | ATCAY    |
| GeneCard | CNTN1    |
| GeneCard | SSTR2    |
| GeneCard | POLR2L   |
| GeneCard | FZD2     |
| GeneCard | SLX4     |
| GeneCard | MKRN3    |
| GeneCard | ADRA1A   |
| GeneCard | PRKD3    |
| GeneCard | SEPTIN2  |
| GeneCard | PPP2R2A  |
| GeneCard | STAM     |
| GeneCard | MID1     |
| GeneCard | MXI1     |
| GeneCard | CDH5     |
| GeneCard | GABBR1   |
| GeneCard | MRPL44   |
| GeneCard | TNRC6A   |
| GeneCard | CHERP    |
| GeneCard | APOL4    |
| GeneCard | ZFYVE27  |
| GeneCard | NAT1     |
| GeneCard | CDCA7    |
| GeneCard | XPO1     |
| GeneCard | AGPS     |
| GeneCard | PRDX5    |
| GeneCard | GORAB    |
| GeneCard | DLC1     |
| GeneCard | RING1    |
| GeneCard | RO60     |
| GeneCard | HECW2    |
| GeneCard | SRSF1    |
| GeneCard | TOR1AIP1 |
| GeneCard | CTRL     |
| GeneCard | SORD     |
| GeneCard | GPI      |
| GeneCard | MIR33B   |
| GeneCard | ICAM3    |

|          |         |
|----------|---------|
| GeneCard | HACD1   |
| GeneCard | EIF2S3  |
| GeneCard | PTPRG   |
| GeneCard | LAD1    |
| GeneCard | DGCR2   |
| GeneCard | DGKQ    |
| GeneCard | SLIT2   |
| GeneCard | RAB6A   |
| GeneCard | TMED10  |
| GeneCard | HTR1B   |
| GeneCard | PSMD9   |
| GeneCard | TUBG1   |
| GeneCard | PRSS3   |
| GeneCard | PLCB3   |
| GeneCard | DDIT4   |
| GeneCard | MDH1    |
| GeneCard | APC2    |
| GeneCard | APOL2   |
| GeneCard | CCND3   |
| GeneCard | ASPH    |
| GeneCard | SLC35A1 |
| GeneCard | RTN2    |
| GeneCard | UNC80   |
| GeneCard | CRHBP   |
| GeneCard | NOC3L   |
| GeneCard | CYP51A1 |
| GeneCard | SELPLG  |
| GeneCard | MAP3K8  |
| GeneCard | SLC5A1  |
| GeneCard | VARS1   |
| GeneCard | CPLX2   |
| GeneCard | MYO3A   |
| GeneCard | S100A6  |
| GeneCard | ARTN    |
| GeneCard | CAPZA2  |
| GeneCard | GLO1    |
| GeneCard | DDB1    |
| GeneCard | ATXN2L  |
| GeneCard | MICU1   |
| GeneCard | MARCKS  |
| GeneCard | GRM7    |
| GeneCard | JAGN1   |
| GeneCard | ZMYND11 |
| GeneCard | LRRK1   |
| GeneCard | ATOX1   |
| GeneCard | SIPA1L2 |
| GeneCard | RPS14   |
| GeneCard | AHNAK   |
| GeneCard | PSCA    |
| GeneCard | VRK2    |
| GeneCard | MAP2K4  |
| GeneCard | MAVS    |
| GeneCard | DM1-AS  |
| GeneCard | DDX21   |
| GeneCard | GRHL2   |
| GeneCard | HGS     |
| GeneCard | CACNG2  |
| GeneCard | ADAM19  |

|          |          |
|----------|----------|
| GeneCard | MASP1    |
| GeneCard | MAD1L1   |
| GeneCard | PSMA4    |
| GeneCard | RNF31    |
| GeneCard | CRBN     |
| GeneCard | KCNC1    |
| GeneCard | DEK      |
| GeneCard | PRG2     |
| GeneCard | PIGO     |
| GeneCard | FADS2    |
| GeneCard | KCNA3    |
| GeneCard | COL14A1  |
| GeneCard | ITGAV    |
| GeneCard | UPF3B    |
| GeneCard | YWHAH    |
| GeneCard | ORC6     |
| GeneCard | H2BC21   |
| GeneCard | CDCA7L   |
| GeneCard | RNF146   |
| GeneCard | MIR129-1 |
| GeneCard | FRAXA    |
| GeneCard | MRPS23   |
| GeneCard | LILRB1   |
| GeneCard | SLC39A1  |
| GeneCard | PVR      |
| GeneCard | CIC      |
| GeneCard | BCAR1    |
| GeneCard | DUSP1    |
| GeneCard | FCHO1    |
| GeneCard | RPA1     |
| GeneCard | HNRNPH1  |
| GeneCard | MARK2    |
| GeneCard | CRY2     |
| GeneCard | FADS1    |
| GeneCard | PRKAA2   |
| GeneCard | CDC25C   |
| GeneCard | SNX5     |
| GeneCard | MIR152   |
| GeneCard | S100A4   |
| GeneCard | RIT2     |
| GeneCard | BID      |
| GeneCard | KREMEN1  |
| GeneCard | CTNNA2   |
| GeneCard | ENPP2    |
| GeneCard | SIRT2    |
| GeneCard | SERPIND1 |
| GeneCard | KLK1     |
| GeneCard | PUS1     |
| GeneCard | TELO2    |
| GeneCard | MIR30C1  |
| GeneCard | ATP6AP1  |
| GeneCard | SSR4     |
| GeneCard | NEBL     |
| GeneCard | CENPB    |
| GeneCard | SSBP1    |
| GeneCard | CD58     |
| GeneCard | MLKL     |
| GeneCard | PTGER2   |

|          |          |
|----------|----------|
| GeneCard | MAP3K20  |
| GeneCard | PSMB3    |
| GeneCard | ADD3     |
| GeneCard | TSPAN7   |
| GeneCard | THOC6    |
| GeneCard | NR1I3    |
| GeneCard | MCM2     |
| GeneCard | PRKCE    |
| GeneCard | EPHA2    |
| GeneCard | COX4I2   |
| GeneCard | NEK10    |
| GeneCard | LPO      |
| GeneCard | NRIP1    |
| GeneCard | HPX      |
| GeneCard | BLNK     |
| GeneCard | PAK1     |
| GeneCard | POLR1D   |
| GeneCard | CUL2     |
| GeneCard | LIPF     |
| GeneCard | MEI1     |
| GeneCard | ACOD1    |
| GeneCard | THOC2    |
| GeneCard | SLC22A2  |
| GeneCard | SLC30A6  |
| GeneCard | HLA-DMB  |
| GeneCard | MIR708   |
| GeneCard | BMI1     |
| GeneCard | NUP62    |
| GeneCard | EML1     |
| GeneCard | TBX6     |
| GeneCard | PSMD2    |
| GeneCard | EIF4H    |
| GeneCard | PLCB2    |
| GeneCard | TMEM175  |
| GeneCard | CCL13    |
| GeneCard | TSEN15   |
| GeneCard | NDN      |
| GeneCard | MPP2     |
| GeneCard | RGS4     |
| GeneCard | INPPL1   |
| GeneCard | C8B      |
| GeneCard | DAB2     |
| GeneCard | ATP5MK   |
| GeneCard | MRPS7    |
| GeneCard | APEH     |
| GeneCard | IGHG3    |
| GeneCard | SIGLEC1  |
| GeneCard | SLC25A6  |
| GeneCard | SMPD2    |
| GeneCard | SLC41A1  |
| GeneCard | LUC7L2   |
| GeneCard | FAR1     |
| GeneCard | SLC6A9   |
| GeneCard | SLC6A20  |
| GeneCard | KRT2     |
| GeneCard | RABGAP1L |
| GeneCard | EPB42    |
| GeneCard | MEIS2    |

|          |          |
|----------|----------|
| GeneCard | CCKAR    |
| GeneCard | RSPO4    |
| GeneCard | GATD3    |
| GeneCard | CCR8     |
| GeneCard | LALBA    |
| GeneCard | CAD      |
| GeneCard | PIGR     |
| GeneCard | ZNF592   |
| GeneCard | P2RY2    |
| GeneCard | LEMD2    |
| GeneCard | UBR1     |
| GeneCard | SDC2     |
| GeneCard | TCF3     |
| GeneCard | MPDZ     |
| GeneCard | SSTR3    |
| GeneCard | STBD1    |
| GeneCard | AP4E1    |
| GeneCard | CLEC12A  |
| GeneCard | MAP2K7   |
| GeneCard | AP2A2    |
| GeneCard | TDO2     |
| GeneCard | HSF1     |
| GeneCard | BMS1     |
| GeneCard | PSMB5    |
| GeneCard | TOLLIP   |
| GeneCard | IL1R2    |
| GeneCard | MT2A     |
| GeneCard | COA6     |
| GeneCard | LTC4S    |
| GeneCard | LEF1     |
| GeneCard | PAK2     |
| GeneCard | CSTA     |
| GeneCard | BDNF-AS  |
| GeneCard | LYRM7    |
| GeneCard | INPP5F   |
| GeneCard | COQ6     |
| GeneCard | PABPC1   |
| GeneCard | PIK3R5   |
| GeneCard | LHB      |
| GeneCard | RUNX3    |
| GeneCard | ADSS1    |
| GeneCard | SUCLG2   |
| GeneCard | RMC1     |
| GeneCard | GYG2     |
| GeneCard | SASH1    |
| GeneCard | STT3A    |
| GeneCard | GNRHR    |
| GeneCard | CHD4     |
| GeneCard | TMC6     |
| GeneCard | POP1     |
| GeneCard | QPCT     |
| GeneCard | TBC1D20  |
| GeneCard | MIR218-1 |
| GeneCard | CDC25B   |
| GeneCard | RFC1     |
| GeneCard | ACMSD    |
| GeneCard | CNNM4    |
| GeneCard | UACA     |



|          |              |
|----------|--------------|
| GeneCard | SLITRK3      |
| GeneCard | PSPN         |
| GeneCard | TAGLN        |
| GeneCard | PDHX         |
| GeneCard | ROR2         |
| GeneCard | MIR371A      |
| GeneCard | GOT1         |
| GeneCard | RDX          |
| GeneCard | TAC3         |
| GeneCard | POLH         |
| GeneCard | RAB5B        |
| GeneCard | IFT81        |
| GeneCard | STIP1        |
| GeneCard | DR1          |
| GeneCard | TRAF3IP2-AS1 |
| GeneCard | CYP8B1       |
| GeneCard | DVL2         |
| GeneCard | POLB         |
| GeneCard | LGALS2       |
| GeneCard | CHRD1        |
| GeneCard | H1-2         |
| GeneCard | GABRG3       |
| GeneCard | AATF         |
| GeneCard | GJC3         |
| GeneCard | PDPK1        |
| GeneCard | TENM4        |
| GeneCard | MS4          |
| GeneCard | LPAR1        |
| GeneCard | MRNIP        |
| GeneCard | FERMT2       |
| GeneCard | PCMT1        |
| GeneCard | CELSR2       |
| GeneCard | FUT8         |
| GeneCard | FMNL2        |
| GeneCard | NCR2         |
| GeneCard | PI4K2A       |
| GeneCard | PTGES        |
| GeneCard | LIMS2        |
| GeneCard | TUFM         |
| GeneCard | MYLK2        |
| GeneCard | PDLIM1       |
| GeneCard | FAM107B      |
| GeneCard | CCR5AS       |
| GeneCard | RICTOR       |
| GeneCard | PYCARD       |
| GeneCard | GFRA2        |
| GeneCard | MAP1LC3B     |
| GeneCard | ERGIC1       |
| GeneCard | SNX6         |
| GeneCard | TNNC1        |
| GeneCard | BLZF1        |
| GeneCard | APLNR        |
| GeneCard | DIAPH1       |
| GeneCard | SPN          |
| GeneCard | SYVN1        |
| GeneCard | GTF2E2       |
| GeneCard | FTCD         |
| GeneCard | UNG          |

|          |          |
|----------|----------|
| GeneCard | MICAL1   |
| GeneCard | CYP2C18  |
| GeneCard | NCOR2    |
| GeneCard | SREK1IP1 |
| GeneCard | FDX2     |
| GeneCard | BCL3     |
| GeneCard | MIR128-2 |
| GeneCard | YDJC     |
| GeneCard | SNRPD3   |
| GeneCard | KIR3DL2  |
| GeneCard | RGS6     |
| GeneCard | LMAN1    |
| GeneCard | HIKESHI  |
| GeneCard | ICAM2    |
| GeneCard | ABCC3    |
| GeneCard | HDAC3    |
| GeneCard | CNDP1    |
| GeneCard | FCAR     |
| GeneCard | BSN      |
| GeneCard | SASS6    |
| GeneCard | PSMC5    |
| GeneCard | CWF19L1  |
| GeneCard | FUZ      |
| GeneCard | SRRT     |
| GeneCard | RXRB     |
| GeneCard | WNT11    |
| GeneCard | CARTPT   |
| GeneCard | TXN2     |
| GeneCard | SERPINB2 |
| GeneCard | C1QBP    |
| GeneCard | RNF168   |
| GeneCard | COMMD1   |
| GeneCard | FNDC5    |
| GeneCard | CASP4    |
| GeneCard | HLA-DRB3 |
| GeneCard | NCAPH2   |
| GeneCard | PTF1A    |
| GeneCard | PSMD14   |
| GeneCard | H4-16    |
| GeneCard | TAF8     |
| GeneCard | DDRKG1   |
| GeneCard | CHEK1    |
| GeneCard | PENK     |
| GeneCard | HS3ST1   |
| GeneCard | PPA2     |
| GeneCard | SCZD10   |
| GeneCard | WDR11    |
| GeneCard | CYP2C8   |
| GeneCard | HAS2     |
| GeneCard | NEDD8    |
| GeneCard | H6PD     |
| GeneCard | LARS1    |
| GeneCard | AAK1     |
| GeneCard | SRD5A1   |
| GeneCard | SCZD6    |
| GeneCard | CCDC22   |
| GeneCard | TREML2   |
| GeneCard | PLIN1    |

|          |          |
|----------|----------|
| GeneCard | IL24     |
| GeneCard | MUC3A    |
| GeneCard | RAPGEF3  |
| GeneCard | LRP12    |
| GeneCard | REG3A    |
| GeneCard | MS4A4E   |
| GeneCard | RGS5     |
| GeneCard | TPT1     |
| GeneCard | RPL28    |
| GeneCard | VPS29    |
| GeneCard | ATP6V1B2 |
| GeneCard | SCZD2    |
| GeneCard | KLK15    |
| GeneCard | GADD45A  |
| GeneCard | SACM1L   |
| GeneCard | TAOK1    |
| GeneCard | ADH1A    |
| GeneCard | RPL13    |
| GeneCard | MAPKAPK2 |
| GeneCard | SYNJ2    |
| GeneCard | CNTN4    |
| GeneCard | NCS1     |
| GeneCard | SEPTIN4  |
| GeneCard | GDAP1L1  |
| GeneCard | RGS1     |
| GeneCard | TRIM25   |
| GeneCard | OBSCN    |
| GeneCard | ZHX2     |
| GeneCard | WARS2    |
| GeneCard | CRIP1    |
| GeneCard | KCND2    |
| GeneCard | NAB2     |
| GeneCard | UBE2T    |
| GeneCard | SELENOP  |
| GeneCard | KIF12    |
| GeneCard | SCZD8    |
| GeneCard | SCZD1    |
| GeneCard | CDK5RAP1 |
| GeneCard | SIM1     |
| GeneCard | HCK      |
| GeneCard | GSTA4    |
| GeneCard | SCZD7    |
| GeneCard | FST      |
| GeneCard | KLF5     |
| GeneCard | COG8     |
| GeneCard | CPN1     |
| GeneCard | RBM28    |
| GeneCard | DOCK2    |
| GeneCard | CHRFAM7A |
| GeneCard | IGFBP7   |
| GeneCard | DLL3     |
| GeneCard | PANK1    |
| GeneCard | TNK2     |
| GeneCard | AP5Z1    |
| GeneCard | SRSF6    |
| GeneCard | CPA6     |
| GeneCard | ARRB2    |
| GeneCard | RABEP1   |

|          |         |
|----------|---------|
| GeneCard | YBX3    |
| GeneCard | DPP10   |
| GeneCard | MIR9-3  |
| GeneCard | CDK9    |
| GeneCard | MT-TY   |
| GeneCard | HOXB7   |
| GeneCard | CCT7    |
| GeneCard | AP2B1   |
| GeneCard | MAPRE2  |
| GeneCard | NR4A1   |
| GeneCard | RBX1    |
| GeneCard | ALDH4A1 |
| GeneCard | IFNL3   |
| GeneCard | MSL3    |
| GeneCard | LRP10   |
| GeneCard | LFNG    |
| GeneCard | MIR323A |
| GeneCard | SCZD11  |
| GeneCard | UPF1    |
| GeneCard | CYP2B6  |
| GeneCard | CYP2J2  |
| GeneCard | PSMD7   |
| GeneCard | ROGDI   |
| GeneCard | CTSS    |
| GeneCard | KCNT2   |
| GeneCard | EMG1    |
| GeneCard | TERF1   |
| GeneCard | NRON    |
| GeneCard | CGB7    |
| GeneCard | DOP1B   |
| GeneCard | PSMB2   |
| GeneCard | RPS18   |
| GeneCard | GRM2    |
| GeneCard | ZSWIM6  |
| GeneCard | B4GALT1 |
| GeneCard | CCDC107 |
| GeneCard | TARS1   |
| GeneCard | UBE2E3  |
| GeneCard | TCF21   |
| GeneCard | TMPRSS2 |
| GeneCard | BRD2    |
| GeneCard | KHDRBS1 |
| GeneCard | LCN1    |
| GeneCard | NFAT5   |
| GeneCard | EN2     |
| GeneCard | SLC51A  |
| GeneCard | SCZD3   |
| GeneCard | SCZD12  |
| GeneCard | CD63    |
| GeneCard | RBMX    |
| GeneCard | PTPN3   |
| GeneCard | CAMK4   |
| GeneCard | S1PR1   |
| GeneCard | UBE4B   |
| GeneCard | THSD7A  |
| GeneCard | DGCR5   |
| GeneCard | GABRB1  |
| GeneCard | FKBP6   |

|          |           |
|----------|-----------|
| GeneCard | OPRL1     |
| GeneCard | DNAJC19   |
| GeneCard | PDE6H     |
| GeneCard | SLC1A7    |
| GeneCard | ARAF      |
| GeneCard | PGAM1     |
| GeneCard | IARS1     |
| GeneCard | PPP2R5A   |
| GeneCard | TNKS      |
| GeneCard | AFF1      |
| GeneCard | DECR1     |
| GeneCard | USP40     |
| GeneCard | HEYL      |
| GeneCard | LTBR      |
| GeneCard | TMEFF2    |
| GeneCard | HIP1R     |
| GeneCard | USP24     |
| GeneCard | SLC5A3    |
| GeneCard | SCZD13    |
| GeneCard | SCZD14    |
| GeneCard | DCAF7     |
| GeneCard | PTGDR     |
| GeneCard | EFHC1     |
| GeneCard | KCNJ3     |
| GeneCard | HAPLN1    |
| GeneCard | SLC4A2    |
| GeneCard | MPI       |
| GeneCard | RPS23     |
| GeneCard | PI4KB     |
| GeneCard | LIN28A    |
| GeneCard | PIGG      |
| GeneCard | PCSK6     |
| GeneCard | SPRY4-IT1 |
| GeneCard | ABCA2     |
| GeneCard | FGF16     |
| GeneCard | PSMB10    |
| GeneCard | VGF       |
| GeneCard | KIF5C     |
| GeneCard | MGLL      |
| GeneCard | KRT6B     |
| GeneCard | PXN       |
| GeneCard | SH3GL1    |
| GeneCard | KIF2A     |
| GeneCard | ROCK1     |
| GeneCard | MAD2L2    |
| GeneCard | C3AR1     |
| GeneCard | RPN2      |
| GeneCard | PSMA2     |
| GeneCard | SNRPD2    |
| GeneCard | NTM       |
| GeneCard | PCGF2     |
| GeneCard | PSMA3     |
| GeneCard | MAP2K6    |
| GeneCard | OVOL2     |
| GeneCard | ACBD5     |
| GeneCard | KCTD17    |
| GeneCard | PPP1R13L  |
| GeneCard | TUBGCP6   |

|          |           |
|----------|-----------|
| GeneCard | PDE4B     |
| GeneCard | MS4A2     |
| GeneCard | VPS37A    |
| GeneCard | PPP3CB    |
| GeneCard | KLF2      |
| GeneCard | ID2       |
| GeneCard | TPM4      |
| GeneCard | PSMD1     |
| GeneCard | CBR1      |
| GeneCard | HCRTR2    |
| GeneCard | EOGT      |
| GeneCard | SRR       |
| GeneCard | GABARAPL1 |
| GeneCard | NFIC      |
| GeneCard | GRM8      |
| GeneCard | HSPBP1    |
| GeneCard | GNAI3     |
| GeneCard | SLC31A1   |
| GeneCard | NCOA4     |
| GeneCard | LIN28B    |
| GeneCard | RNF6      |
| GeneCard | OPRK1     |
| GeneCard | NAA15     |
| GeneCard | IGFBP5    |
| GeneCard | RCVRN     |
| GeneCard | SNX1      |
| GeneCard | RPLP2     |
| GeneCard | NGF-AS1   |
| GeneCard | TIPRL     |
| GeneCard | FANCD2OS  |
| GeneCard | RPS11     |
| GeneCard | ADH5      |
| GeneCard | RPS6KA1   |
| GeneCard | ST8SIA4   |
| GeneCard | PGAM5     |
| GeneCard | SEC23A    |
| GeneCard | CD320     |
| GeneCard | TNIK      |
| GeneCard | RNF11     |
| GeneCard | GSDMB     |
| GeneCard | CDH4      |
| GeneCard | LARP7     |
| GeneCard | ATIC      |
| GeneCard | ATP13A3   |
| GeneCard | HOMER2    |
| GeneCard | WNT16     |
| GeneCard | BAG2      |
| GeneCard | ST14      |
| GeneCard | KCNIP2    |
| GeneCard | C20orf203 |
| GeneCard | GNB2      |
| GeneCard | RILP      |
| GeneCard | NUDT15    |
| GeneCard | UBE2E2    |
| GeneCard | PTPN6     |
| GeneCard | PROK2     |
| GeneCard | DNAJC12   |
| GeneCard | SEPTIN1   |

|          |          |
|----------|----------|
| GeneCard | ZCWPW1   |
| GeneCard | LYN      |
| GeneCard | S1PR2    |
| GeneCard | PACSIN3  |
| GeneCard | KLRC1    |
| GeneCard | CAPNS1   |
| GeneCard | RPL19    |
| GeneCard | CASP12   |
| GeneCard | LAP3     |
| GeneCard | PCSK5    |
| GeneCard | ABCD2    |
| GeneCard | RPL3L    |
| GeneCard | SMARCD1  |
| GeneCard | ELMO1    |
| GeneCard | NUDT6    |
| GeneCard | EGR3     |
| GeneCard | AGO2     |
| GeneCard | NCOR1    |
| GeneCard | CD99     |
| GeneCard | COA7     |
| GeneCard | ABI3     |
| GeneCard | ERCC6L2  |
| GeneCard | ALPK3    |
| GeneCard | CRK      |
| GeneCard | SCG2     |
| GeneCard | LTBP1    |
| GeneCard | PAGR1    |
| GeneCard | GTDC1    |
| GeneCard | NDUFAB1  |
| GeneCard | MT1B     |
| GeneCard | SRP19    |
| GeneCard | MCC      |
| GeneCard | PRICKLE2 |
| GeneCard | CCNT1    |
| GeneCard | HCCS     |
| GeneCard | RPN1     |
| GeneCard | TFF2     |
| GeneCard | DENR     |
| GeneCard | NCKIPSD  |
| GeneCard | NPTX2    |
| GeneCard | MRPL23   |
| GeneCard | HERPUD1  |
| GeneCard | FGF13    |
| GeneCard | ARCN1    |
| GeneCard | ANKS1B   |
| GeneCard | ANGPTL4  |
| GeneCard | AZU1     |
| GeneCard | SAR1A    |
| GeneCard | HELT     |
| GeneCard | MCTP2    |
| GeneCard | GNB5     |
| GeneCard | NPAS2    |
| GeneCard | NAXE     |
| GeneCard | CSPG4    |
| GeneCard | FAF1     |
| GeneCard | KCNAB2   |
| GeneCard | TBATA    |
| GeneCard | CTF1     |

|          |             |
|----------|-------------|
| GeneCard | ELOB        |
| GeneCard | SHROOM3     |
| GeneCard | KIR2DL3     |
| GeneCard | WIP1        |
| GeneCard | NDEL1       |
| GeneCard | CHL1        |
| GeneCard | BAMBI       |
| GeneCard | IL3RA       |
| GeneCard | REEP2       |
| GeneCard | COBL        |
| GeneCard | EN1         |
| GeneCard | SNRPE       |
| GeneCard | EXOSC10     |
| GeneCard | PDCD4       |
| GeneCard | HRG         |
| GeneCard | PPP6C       |
| GeneCard | LNPEP       |
| GeneCard | RBP1        |
| GeneCard | MAP3K13     |
| GeneCard | IL15RA      |
| GeneCard | KLK11       |
| GeneCard | SULT2A1     |
| GeneCard | HMGN1       |
| GeneCard | PLA2G10     |
| GeneCard | CLDN11      |
| GeneCard | SFXN4       |
| GeneCard | ARNT        |
| GeneCard | CCDC62      |
| GeneCard | IL6-AS1     |
| GeneCard | CTBP2       |
| GeneCard | CREM        |
| GeneCard | CRABP1      |
| GeneCard | PSIP1       |
| GeneCard | RER1        |
| GeneCard | TERF2       |
| GeneCard | HOXA1       |
| GeneCard | NR1D1       |
| GeneCard | RHBDF2      |
| GeneCard | MINK1       |
| GeneCard | CILK1       |
| GeneCard | MTDH        |
| GeneCard | STRADA      |
| GeneCard | CRLF1       |
| GeneCard | IL17RD      |
| GeneCard | DNAJC30     |
| GeneCard | PSMD11      |
| GeneCard | NAV2        |
| GeneCard | PRDM5       |
| GeneCard | RNASE2      |
| GeneCard | SMARCD2     |
| GeneCard | RPS10-NUDT3 |
| GeneCard | OXR         |
| GeneCard | RAD54B      |
| GeneCard | ANXA6       |
| GeneCard | GRM3        |
| GeneCard | MFHAS1      |
| GeneCard | RPL21       |
| GeneCard | DDAH1       |



|          |          |
|----------|----------|
| GeneCard | ATG101   |
| GeneCard | CD47     |
| GeneCard | DUSP6    |
| GeneCard | CA9      |
| GeneCard | NAV1     |
| GeneCard | UBE2S    |
| GeneCard | PDE9A    |
| GeneCard | HLA-DOB  |
| GeneCard | ACP2     |
| GeneCard | SLC27A4  |
| GeneCard | AKR1A1   |
| GeneCard | FUBP1    |
| GeneCard | CCHCR1   |
| GeneCard | SELENBP1 |
| GeneCard | AK1      |
| GeneCard | NDUFA8   |
| GeneCard | PLK1     |
| GeneCard | SNX10    |
| GeneCard | RAE1     |
| GeneCard | PIP5K1C  |
| GeneCard | TECR     |
| GeneCard | SLIT1    |
| GeneCard | TBL3     |
| GeneCard | AOC1     |
| GeneCard | TGM5     |
| GeneCard | IGLON5   |
| GeneCard | DNM3     |
| GeneCard | CYBRD1   |
| GeneCard | SLC5A6   |
| GeneCard | NCAN     |
| GeneCard | SNHG1    |
| GeneCard | TST      |
| GeneCard | TUBA8    |
| GeneCard | ST13     |
| GeneCard | ATP6V0C  |
| GeneCard | CRTC1    |
| GeneCard | GNLY     |
| GeneCard | ADAMTS20 |
| GeneCard | ZNF23    |
| GeneCard | PIK3R3   |
| GeneCard | SEM1     |
| GeneCard | EXOC4    |
| GeneCard | IGSF6    |
| GeneCard | TCFL5    |
| GeneCard | FYCO1    |
| GeneCard | EMP3     |
| GeneCard | AP1B1    |
| GeneCard | PNOC     |
| GeneCard | LRMDA    |
| GeneCard | ROBO3    |
| GeneCard | CXADR    |
| GeneCard | PFKFB3   |
| GeneCard | MIR136   |
| GeneCard | KIAA0319 |
| GeneCard | ALAS1    |
| GeneCard | POLRMT   |
| GeneCard | MALRD1   |
| GeneCard | CCDC50   |

|          |             |
|----------|-------------|
| GeneCard | ICMT        |
| GeneCard | ZSCAN21     |
| GeneCard | MESD        |
| GeneCard | RPL7A       |
| GeneCard | WASL        |
| GeneCard | RAB40AL     |
| GeneCard | MIR219A1    |
| GeneCard | MLST8       |
| GeneCard | LY9         |
| GeneCard | CCL8        |
| GeneCard | H4C13       |
| GeneCard | PSMG1       |
| GeneCard | SYNC        |
| GeneCard | SLC18A1     |
| GeneCard | TCEA2       |
| GeneCard | GPT2        |
| GeneCard | PHIP        |
| GeneCard | AZGP1       |
| GeneCard | MIR16-2     |
| GeneCard | NSF         |
| GeneCard | PPP5C       |
| GeneCard | HEY1        |
| GeneCard | SH3PXD2A    |
| GeneCard | CRELD1      |
| GeneCard | NUDC        |
| GeneCard | PRKCI       |
| GeneCard | TBCEL-TECTA |
| GeneCard | DNASE1L1    |
| GeneCard | PFKP        |
| GeneCard | TET3        |
| GeneCard | NLGN1       |
| GeneCard | FAM167A     |
| GeneCard | MIR497      |
| GeneCard | VPS41       |
| GeneCard | RAB1B       |
| GeneCard | SRSF3       |
| GeneCard | C12orf4     |
| GeneCard | UBA52       |
| GeneCard | NISCH       |
| GeneCard | CCL24       |
| GeneCard | ARNT2       |
| GeneCard | MIR346      |
| GeneCard | DAB2IP      |
| GeneCard | CCDC6       |
| GeneCard | LTA4H       |
| GeneCard | NSMCE2      |
| GeneCard | DLGAP2      |
| GeneCard | VPS53       |
| GeneCard | RDH11       |
| GeneCard | SPATA5L1    |
| GeneCard | CDC5L       |
| GeneCard | TXNL4A      |
| GeneCard | HVCN1       |
| GeneCard | ATG12       |
| GeneCard | STK36       |
| GeneCard | PYROXD1     |
| GeneCard | SLC25A5     |
| GeneCard | NDUFA5      |

|          |          |
|----------|----------|
| GeneCard | KRT75    |
| GeneCard | MRPL3    |
| GeneCard | HOXB13   |
| GeneCard | SP4      |
| GeneCard | NAT8L    |
| GeneCard | PCK2     |
| GeneCard | PIH1D2   |
| GeneCard | CENPA    |
| GeneCard | ADPRS    |
| GeneCard | EPB41L1  |
| GeneCard | CLEC4E   |
| GeneCard | RPS9     |
| GeneCard | HACE1    |
| GeneCard | MELTF    |
| GeneCard | MAPT-AS1 |
| GeneCard | KLK7     |
| GeneCard | SLC44A1  |
| GeneCard | HCP5     |
| GeneCard | DLG2     |
| GeneCard | RBM4     |
| GeneCard | ADCY8    |
| GeneCard | ABT1     |
| GeneCard | RCBTB1   |
| GeneCard | MPZL1    |
| GeneCard | SPON1    |
| GeneCard | PPME1    |
| GeneCard | NEGR1    |
| GeneCard | MIR26A2  |
| GeneCard | SVIL     |
| GeneCard | WDR41    |
| GeneCard | SDC3     |
| GeneCard | PBRM1    |
| GeneCard | DDX1     |
| GeneCard | KPNA2    |
| GeneCard | PFAS     |
| GeneCard | CBLB     |
| GeneCard | TFB1M    |
| GeneCard | TGDS     |
| GeneCard | PAPSS2   |
| GeneCard | FCHSD2   |
| GeneCard | CAMK1D   |
| GeneCard | ADCY1    |
| GeneCard | SKAP2    |
| GeneCard | CIRBP    |
| GeneCard | DIABLO   |
| GeneCard | GLRX5    |
| GeneCard | TNR      |
| GeneCard | ARR3     |
| GeneCard | ILK      |
| GeneCard | RPS25    |
| GeneCard | RPS12    |
| GeneCard | PTN      |
| GeneCard | EFNB2    |
| GeneCard | PSMD8    |
| GeneCard | IQSEC1   |
| GeneCard | HSPA6    |
| GeneCard | SENP7    |
| GeneCard | PFN2     |

|          |          |
|----------|----------|
| GeneCard | IPO8     |
| GeneCard | UBXN6    |
| GeneCard | TIMM13   |
| GeneCard | SLC30A4  |
| GeneCard | GOLGA4   |
| GeneCard | RPLP1    |
| GeneCard | MIR381   |
| GeneCard | PRKAR2B  |
| GeneCard | NXNL1    |
| GeneCard | TBXA2R   |
| GeneCard | CDC45    |
| GeneCard | RHOD     |
| GeneCard | EEF1D    |
| GeneCard | RHOT1    |
| GeneCard | TYRO3    |
| GeneCard | COQ7     |
| GeneCard | RPS3     |
| GeneCard | OPRD1    |
| GeneCard | DDR1     |
| GeneCard | PASK     |
| GeneCard | SNRPC    |
| GeneCard | ST2      |
| GeneCard | VAPA     |
| GeneCard | RAD23A   |
| GeneCard | POU2F1   |
| GeneCard | PRDX6    |
| GeneCard | DDX6     |
| GeneCard | RPL13A   |
| GeneCard | TMPRSS15 |
| GeneCard | MIR124-3 |
| GeneCard | MCM7     |
| GeneCard | SMAD1    |
| GeneCard | SHMT2    |
| GeneCard | PCA3     |
| GeneCard | RALA     |
| GeneCard | CAPN8    |
| GeneCard | EED      |
| GeneCard | VIPR1    |
| GeneCard | ESRRB    |
| GeneCard | PER1     |
| GeneCard | ELOC     |
| GeneCard | BIRC2    |
| GeneCard | PFKL     |
| GeneCard | LGMN     |
| GeneCard | IGFBP4   |
| GeneCard | SPEG     |
| GeneCard | METTL27  |
| GeneCard | FKBP4    |
| GeneCard | TEX14    |
| GeneCard | ENTR1    |
| GeneCard | CEMIP2   |
| GeneCard | ADGRA3   |
| GeneCard | PPHLN1   |
| GeneCard | FOSL1    |
| GeneCard | IL1RAP   |
| GeneCard | CYFIP1   |
| GeneCard | ISCA2    |
| GeneCard | THSD4    |

|          |          |
|----------|----------|
| GeneCard | AMD1     |
| GeneCard | PDLIM5   |
| GeneCard | COPB2    |
| GeneCard | PRRC2A   |
| GeneCard | LUM      |
| GeneCard | LETM1    |
| GeneCard | NELFA    |
| GeneCard | FTMT     |
| GeneCard | LNX1     |
| GeneCard | MEOX1    |
| GeneCard | MPP7     |
| GeneCard | APPBP2   |
| GeneCard | ADAMTS14 |
| GeneCard | CCNC     |
| GeneCard | ISYNA1   |
| GeneCard | PDZD9    |
| GeneCard | TRAIP    |
| GeneCard | ABCA5    |
| GeneCard | SGMS1    |
| GeneCard | RPS2     |
| GeneCard | AGR2     |
| GeneCard | MIR339   |
| GeneCard | POLR2E   |
| GeneCard | WNT5B    |
| GeneCard | EOMES    |
| GeneCard | FZD1     |
| GeneCard | SOCS2    |
| GeneCard | OXCT1    |
| GeneCard | EVPL     |
| GeneCard | HOMER1   |
| GeneCard | YBX1     |
| GeneCard | PPP1R8   |
| GeneCard | SLC7A5   |
| GeneCard | PPP2R1B  |
| GeneCard | FZD8     |
| GeneCard | MUC12    |
| GeneCard | TRPC4    |
| GeneCard | HHAT     |
| GeneCard | QKI      |
| GeneCard | CDR2     |
| GeneCard | ITGA1    |
| GeneCard | DLGAP1   |
| GeneCard | ELAVL3   |
| GeneCard | IRF2     |
| GeneCard | ELAVL2   |
| GeneCard | BCL2A1   |
| GeneCard | MIEF2    |
| GeneCard | NCL      |
| GeneCard | PPP1R15A |
| GeneCard | ICAM5    |
| GeneCard | CASZ1    |
| GeneCard | USP6     |
| GeneCard | ACP3     |
| GeneCard | STMN1    |
| GeneCard | IMMP2L   |
| GeneCard | PGC      |
| GeneCard | TAF13    |
| GeneCard | TUBA1C   |

|          |         |
|----------|---------|
| GeneCard | DPEP1   |
| GeneCard | C4BPA   |
| GeneCard | HMGCS2  |
| GeneCard | PSRC1   |
| GeneCard | CRYBB3  |
| GeneCard | BTRC    |
| GeneCard | INAFM2  |
| GeneCard | HEPH    |
| GeneCard | KATNB1  |
| GeneCard | GNA15   |
| GeneCard | IMPA1   |
| GeneCard | MYOZ2   |
| GeneCard | MAST1   |
| GeneCard | CARS1   |
| GeneCard | MRPS2   |
| GeneCard | RCOR1   |
| GeneCard | KCNA4   |
| GeneCard | RPL10A  |
| GeneCard | BEX3    |
| GeneCard | FAT3    |
| GeneCard | RAB6B   |
| GeneCard | RPS27L  |
| GeneCard | SNIP1   |
| GeneCard | PTGER3  |
| GeneCard | CLASRP  |
| GeneCard | FGF12   |
| GeneCard | GHITM   |
| GeneCard | ZNF224  |
| GeneCard | NUP37   |
| GeneCard | ARRB1   |
| GeneCard | ANKRD50 |
| GeneCard | TUBA3C  |
| GeneCard | PPP1R9B |
| GeneCard | CALML5  |
| GeneCard | WWP2    |
| GeneCard | BRWD1   |
| GeneCard | SPHK1   |
| GeneCard | DHRS2   |
| GeneCard | DGCR6   |
| GeneCard | ETV5    |
| GeneCard | PSMF1   |
| GeneCard | PRDM2   |
| GeneCard | FNIP1   |
| GeneCard | GPC5    |
| GeneCard | SLC22A6 |
| GeneCard | FAM47E  |
| GeneCard | GNAI1   |
| GeneCard | ZRSR2   |
| GeneCard | SSX2    |
| GeneCard | CYP26A1 |
| GeneCard | RAB8B   |
| GeneCard | UBE3C   |
| GeneCard | POLR3K  |
| GeneCard | TNKS2   |
| GeneCard | OTOGL   |
| GeneCard | YLPM1   |
| GeneCard | AKAP13  |
| GeneCard | ADRA2C  |

|          |          |
|----------|----------|
| GeneCard | BAIAP2   |
| GeneCard | CNOT3    |
| GeneCard | ESM1     |
| GeneCard | MIR582   |
| GeneCard | RBM17    |
| GeneCard | RFWD3    |
| GeneCard | WNT9A    |
| GeneCard | SLC30A3  |
| GeneCard | APOC4    |
| GeneCard | ACADSB   |
| GeneCard | LAMC1    |
| GeneCard | RPTOR    |
| GeneCard | WEE1     |
| GeneCard | PLXNB2   |
| GeneCard | GPX7     |
| GeneCard | NEPRO    |
| GeneCard | ST6GAL1  |
| GeneCard | RGS2     |
| GeneCard | LPIN1    |
| GeneCard | MIR181B2 |
| GeneCard | AP2A1    |
| GeneCard | FIBP     |
| GeneCard | HIF1AN   |
| GeneCard | CYSLTR2  |
| GeneCard | GUCY1B1  |
| GeneCard | AS3MT    |
| GeneCard | ZBTB16   |
| GeneCard | MAPK11   |
| GeneCard | RAB1A    |
| GeneCard | PKNOX1   |
| GeneCard | AMFR     |
| GeneCard | CHRM4    |
| GeneCard | GRK5     |
| GeneCard | CHRNB4   |
| GeneCard | COX5B    |
| GeneCard | SLC3A2   |
| GeneCard | MGRN1    |
| GeneCard | SIRT6    |
| GeneCard | FABP5    |
| GeneCard | AURKB    |
| GeneCard | PAK4     |
| GeneCard | SLC13A3  |
| GeneCard | RAPGEF4  |
| GeneCard | COPS5    |
| GeneCard | MNDA     |
| GeneCard | LSM4     |
| GeneCard | ZNF804A  |
| GeneCard | DYNLL1   |
| GeneCard | FBXO48   |
| GeneCard | VTI1B    |
| GeneCard | VWA7     |
| GeneCard | ATP8A1   |
| GeneCard | ROCK2    |
| GeneCard | KPNB1    |
| GeneCard | ZFYVE1   |
| GeneCard | STK32B   |
| GeneCard | PMVK     |
| GeneCard | TRAPPC10 |

|          |           |
|----------|-----------|
| GeneCard | USF2      |
| GeneCard | GPHA2     |
| GeneCard | MBTPS1    |
| GeneCard | CAMKK2    |
| GeneCard | AEBP1     |
| GeneCard | PRPS2     |
| GeneCard | AKR1C4    |
| GeneCard | TRIM31    |
| GeneCard | MUCL3     |
| GeneCard | TRAM2     |
| GeneCard | ATP2B1    |
| GeneCard | VIPR2     |
| GeneCard | RPL6      |
| GeneCard | AHSA1     |
| GeneCard | RPL38     |
| GeneCard | TAF1L     |
| GeneCard | MIR4709   |
| GeneCard | ST3GAL4   |
| GeneCard | EXTL3     |
| GeneCard | SUPT3H    |
| GeneCard | SYMPK     |
| GeneCard | TLN1      |
| GeneCard | BCAT1     |
| GeneCard | SLC25A28  |
| GeneCard | MACROH2A1 |
| GeneCard | P3H3      |
| GeneCard | WNT6      |
| GeneCard | STC1      |
| GeneCard | SEPTIN3   |
| GeneCard | CPT1C     |
| GeneCard | CTSE      |
| GeneCard | SLC25A11  |
| GeneCard | DHX9      |
| GeneCard | BCAS3     |
| GeneCard | HRH4      |
| GeneCard | SUPT4H1   |
| GeneCard | H4C9      |
| GeneCard | TNFRSF14  |
| GeneCard | MEIS1     |
| GeneCard | H4C8      |
| GeneCard | AZIN2     |
| GeneCard | CNTFR     |
| GeneCard | NCLN      |
| GeneCard | ALDH9A1   |
| GeneCard | SCARF2    |
| GeneCard | NR2C2     |
| GeneCard | KEL       |
| GeneCard | KLC4      |
| GeneCard | PDS5B     |
| GeneCard | ARHGAP1   |
| GeneCard | ANKRD30A  |
| GeneCard | ALCAM     |
| GeneCard | SLC44A5   |
| GeneCard | VPS4B     |
| GeneCard | GALNT2    |
| GeneCard | SEPTIN7   |
| GeneCard | SRM       |
| GeneCard | MIR671    |



|          |           |
|----------|-----------|
| GeneCard | EXOC1     |
| GeneCard | TXNRD1    |
| GeneCard | H4C4      |
| GeneCard | SP6       |
| GeneCard | PRSS12    |
| GeneCard | PDK2      |
| GeneCard | NECAP1    |
| GeneCard | FARP1     |
| GeneCard | RAB11FIP2 |
| GeneCard | HNRNPA3   |
| GeneCard | CEBPD     |
| GeneCard | H4C1      |
| GeneCard | FOSB      |
| GeneCard | PSMA8     |
| GeneCard | APBB1IP   |
| GeneCard | DEFA6     |
| GeneCard | RTN1      |
| GeneCard | AGFG1     |
| GeneCard | SOAT2     |
| GeneCard | KIF4A     |
| GeneCard | DDX54     |
| GeneCard | ADPRH     |
| GeneCard | SLC17A1   |
| GeneCard | MIR95     |
| GeneCard | MAPKAPK3  |
| GeneCard | NKIRAS1   |
| GeneCard | POTEF     |
| GeneCard | RACK1     |
| GeneCard | TNFSF14   |
| GeneCard | TIMM29    |
| GeneCard | ABCG4     |
| GeneCard | ADORA2B   |
| GeneCard | RPS3A     |
| GeneCard | GNPDA2    |
| GeneCard | HNRNPF    |
| GeneCard | CC2D2B    |
| GeneCard | TCHH      |
| GeneCard | PILRA     |
| GeneCard | TARS2     |
| GeneCard | CLMN      |
| GeneCard | VASP      |
| GeneCard | KCTD13    |
| GeneCard | KIR2DL2   |
| GeneCard | TXNL1     |
| GeneCard | PPP1R17   |
| GeneCard | MCM3      |
| GeneCard | CADPS2    |
| GeneCard | H4C11     |
| GeneCard | KLC3      |
| GeneCard | CA1       |
| GeneCard | BMPER     |
| GeneCard | NDUFS5    |
| GeneCard | SEC24B    |
| GeneCard | UBE2G2    |
| GeneCard | KDELRL1   |
| GeneCard | CDCP2     |
| GeneCard | EFNA5     |
| GeneCard | CTBS      |

|          |           |
|----------|-----------|
| GeneCard | RPS5      |
| GeneCard | PLA2G1B   |
| GeneCard | FBXO40    |
| GeneCard | GCN1      |
| GeneCard | SECISBP2  |
| GeneCard | FAM30A    |
| GeneCard | RPS13     |
| GeneCard | DDX17     |
| GeneCard | CD82      |
| GeneCard | RPL3      |
| GeneCard | LACRT     |
| GeneCard | CDC7      |
| GeneCard | NDUFB6    |
| GeneCard | CTSZ      |
| GeneCard | IL32      |
| GeneCard | NLRP5     |
| GeneCard | PRSS2     |
| GeneCard | CCNY      |
| GeneCard | RAI2      |
| GeneCard | ACAD8     |
| GeneCard | SUPV3L1   |
| GeneCard | MTRNR2L12 |
| GeneCard | PPIL2     |
| GeneCard | IFI16     |
| GeneCard | DOCK1     |
| GeneCard | FAU       |
| GeneCard | RBM25     |
| GeneCard | MFAP2     |
| GeneCard | SLC25A26  |
| GeneCard | MED15     |
| GeneCard | CDR1-AS   |
| GeneCard | AADAT     |
| GeneCard | ARHGAP24  |
| GeneCard | COX6C     |
| GeneCard | HTR3B     |
| GeneCard | PHF23     |
| GeneCard | RPL23     |
| GeneCard | GGPS1     |
| GeneCard | TACR2     |
| GeneCard | SUPT5H    |
| GeneCard | PDCD1LG2  |
| GeneCard | ATP8B4    |
| GeneCard | CASS4     |
| GeneCard | DPY19L2P2 |
| GeneCard | HNRNPM    |
| GeneCard | CAPZB     |
| GeneCard | CPE       |
| GeneCard | PERP      |
| GeneCard | SLC25A3   |
| GeneCard | VPS26B    |
| GeneCard | PYCR2     |
| GeneCard | HOOK1     |
| GeneCard | SLC30A7   |
| GeneCard | PTPRD     |
| GeneCard | G6PC2     |
| GeneCard | MSI1      |
| GeneCard | MSRB1     |
| GeneCard | COPB1     |

|          |              |
|----------|--------------|
| GeneCard | EIF5A        |
| GeneCard | RPL27A       |
| GeneCard | RAD23B       |
| GeneCard | GGA3         |
| GeneCard | PLAGL1       |
| GeneCard | UBXN4        |
| GeneCard | CHMP4B       |
| GeneCard | ZDHHC17      |
| GeneCard | MAP2K3       |
| GeneCard | SLC30A1      |
| GeneCard | MLLT1        |
| GeneCard | KDM3B        |
| GeneCard | CDK5RAP3     |
| GeneCard | SYNCRIP      |
| GeneCard | TRA2B        |
| GeneCard | OST4         |
| GeneCard | NCAPD2       |
| GeneCard | FABP7        |
| GeneCard | G3BP2        |
| GeneCard | PTPN13       |
| GeneCard | MPIG6B       |
| GeneCard | ABI1         |
| GeneCard | EPS15        |
| GeneCard | CHP1         |
| GeneCard | IWS1         |
| GeneCard | NELFCD       |
| GeneCard | SEL1L        |
| GeneCard | NRF1         |
| GeneCard | DSCAML1      |
| GeneCard | RPL30        |
| GeneCard | ARG2         |
| GeneCard | PTRHD1       |
| GeneCard | EPPK1        |
| GeneCard | THBS3        |
| GeneCard | WASHC1       |
| GeneCard | CAMK2D       |
| GeneCard | PPP2R3A      |
| GeneCard | URB2         |
| GeneCard | ESS2         |
| GeneCard | ST8SIA2      |
| GeneCard | BRSK2        |
| GeneCard | RAB12        |
| GeneCard | LOC111258525 |
| GeneCard | MAP2K5       |
| GeneCard | CLP1         |
| GeneCard | ERAL1        |
| GeneCard | TOP2B        |
| GeneCard | ARL2         |
| GeneCard | TXNIP        |
| GeneCard | CTPS1        |
| GeneCard | GKN1         |
| GeneCard | LAMC3        |
| GeneCard | MRPL58       |
| GeneCard | FOXA2        |
| GeneCard | DFFA         |
| GeneCard | CFDP1        |
| GeneCard | SSX1         |
| GeneCard | ADAM8        |

|          |          |
|----------|----------|
| GeneCard | ZFR      |
| GeneCard | CD5L     |
| GeneCard | VTA1     |
| GeneCard | NMNAT2   |
| GeneCard | HMHB1    |
| GeneCard | FUT1     |
| GeneCard | USP16    |
| GeneCard | GNA14    |
| GeneCard | PROKR1   |
| GeneCard | NSDHL    |
| GeneCard | MT-TR    |
| GeneCard | FLRT1    |
| GeneCard | TRAPPC14 |
| GeneCard | DNAH6    |
| GeneCard | PSMB7    |
| GeneCard | MAPK7    |
| GeneCard | TDP2     |
| GeneCard | FRMD6    |
| GeneCard | TTC3     |
| GeneCard | MROH8    |
| GeneCard | AKT1S1   |
| GeneCard | PITPNA   |
| GeneCard | PICK1    |
| GeneCard | MASTL    |
| GeneCard | SMAD5    |
| GeneCard | FGR      |
| GeneCard | CREB3L4  |
| GeneCard | COG1     |
| GeneCard | PTCD1    |
| GeneCard | CDC42EP3 |
| GeneCard | MEST     |
| GeneCard | HSP90AB1 |
| GeneCard | RNF186   |
| GeneCard | JAG2     |
| GeneCard | WNT8A    |
| GeneCard | FER      |
| GeneCard | RAB11B   |
| GeneCard | ATL3     |
| GeneCard | PPP1R14A |
| GeneCard | JUNB     |
| GeneCard | MIR219A2 |
| GeneCard | MAPK13   |
| GeneCard | ACACB    |
| GeneCard | PLXNA1   |
| GeneCard | SAP30BP  |
| GeneCard | CLDN5    |
| GeneCard | NRN1     |
| GeneCard | KIR2DS4  |
| GeneCard | ARIH2    |
| GeneCard | LATS1    |
| GeneCard | RPS16    |
| GeneCard | TBC1D15  |
| GeneCard | TNFAIP6  |
| GeneCard | ACAD11   |
| GeneCard | CDK12    |
| GeneCard | AGPAT1   |
| GeneCard | RPL4     |
| GeneCard | CLINT1   |

|          |          |
|----------|----------|
| GeneCard | H4C3     |
| GeneCard | PTPN5    |
| GeneCard | EIF4A3   |
| GeneCard | PPP1R10  |
| GeneCard | PPM1B    |
| GeneCard | ACER3    |
| GeneCard | GULOP    |
| GeneCard | PAICS    |
| GeneCard | MCM5     |
| GeneCard | IL20     |
| GeneCard | PSMD13   |
| GeneCard | SRSF9    |
| GeneCard | SEMA3F   |
| GeneCard | TPD52    |
| GeneCard | GPRASP2  |
| GeneCard | CASP5    |
| GeneCard | OLFML3   |
| GeneCard | ANKFY1   |
| GeneCard | IZUMO1   |
| GeneCard | NXF1     |
| GeneCard | NCAM2    |
| GeneCard | NDUFA3   |
| GeneCard | H4C2     |
| GeneCard | ASRGL1   |
| GeneCard | DERL2    |
| GeneCard | RPL12    |
| GeneCard | SLC5A4   |
| GeneCard | CHP2     |
| GeneCard | UNC13C   |
| GeneCard | H4C6     |
| GeneCard | STAMBPL1 |
| GeneCard | ATG4B    |
| GeneCard | SEMA4D   |
| GeneCard | NUB1     |
| GeneCard | ING1     |
| GeneCard | CLPP     |
| GeneCard | LDB1     |
| GeneCard | H4C14    |
| GeneCard | H4C15    |
| GeneCard | BOK      |
| GeneCard | AQP10    |
| GeneCard | H4C12    |
| GeneCard | POLI     |
| GeneCard | EPC1     |
| GeneCard | CTNNBL1  |
| GeneCard | RIMBP2   |
| GeneCard | MAMLD1   |
| GeneCard | RIPPLY3  |
| GeneCard | SF3B2    |
| GeneCard | SLCO1A2  |
| GeneCard | TRIM39   |
| GeneCard | CENPT    |
| GeneCard | TOMM70   |
| GeneCard | SLC12A9  |
| GeneCard | UBAC1    |
| GeneCard | MAP3K6   |
| GeneCard | DHRS11   |
| GeneCard | B3GAT1   |

|          |          |
|----------|----------|
| GeneCard | GLIS1    |
| GeneCard | RAB35    |
| GeneCard | H4C5     |
| GeneCard | SRSF7    |
| GeneCard | SNX2     |
| GeneCard | NCBP1    |
| GeneCard | MED1     |
| GeneCard | UQCR10   |
| GeneCard | HLA-DQB2 |
| GeneCard | SPTBN1   |
| GeneCard | CLIC1    |
| GeneCard | CARD16   |
| GeneCard | SIX2     |
| GeneCard | PPP1R3B  |
| GeneCard | MIR124-2 |
| GeneCard | LUZP2    |
| GeneCard | AOX1     |
| GeneCard | QARS1    |
| GeneCard | CYB561   |
| GeneCard | MIR125B2 |
| GeneCard | MAB21L2  |
| GeneCard | HYOU1    |
| GeneCard | RPH3A    |
| GeneCard | PDCD6IP  |
| GeneCard | SERPINB6 |
| GeneCard | HSD17B12 |
| GeneCard | HAND1    |
| GeneCard | PLIN3    |
| GeneCard | TMLHE    |
| GeneCard | GAPDHS   |
| GeneCard | ASXL2    |
| GeneCard | C5AR2    |
| GeneCard | TMSB4X   |
| GeneCard | CCDC88A  |
| GeneCard | PLK4     |
| GeneCard | TLN2     |
| GeneCard | BCAT2    |
| GeneCard | PAEP     |
| GeneCard | MCFD2    |
| GeneCard | GBGT1    |
| GeneCard | RBMS3    |
| GeneCard | CSN1S1   |
| GeneCard | MYBBP1A  |
| GeneCard | NHLRC2   |
| GeneCard | PUM1     |
| GeneCard | PCBP2    |
| GeneCard | RANGAP1  |
| GeneCard | ATP5MC1  |
| GeneCard | RUVBL1   |
| GeneCard | H2AC20   |
| GeneCard | TLE1     |
| GeneCard | PHYHIP   |
| GeneCard | KLK10    |
| GeneCard | PCDHA11  |
| GeneCard | ADAM22   |
| GeneCard | ATP5PB   |
| GeneCard | SNAP91   |
| GeneCard | INSRR    |

|          |              |
|----------|--------------|
| GeneCard | HCRT1        |
| GeneCard | PSMD6        |
| GeneCard | CCN4         |
| GeneCard | CCL1         |
| GeneCard | NAT16        |
| GeneCard | KPNA1        |
| GeneCard | NCKAP1L      |
| GeneCard | FBXW11       |
| GeneCard | LGALS3BP     |
| GeneCard | RAB4A        |
| GeneCard | BAG1         |
| GeneCard | RPS4X        |
| GeneCard | SNX9         |
| GeneCard | ATP6V1E1     |
| GeneCard | CBSL         |
| GeneCard | OARD1        |
| GeneCard | WDR12        |
| GeneCard | H3C1         |
| GeneCard | RSU1         |
| GeneCard | HAGH         |
| GeneCard | CFAP91       |
| GeneCard | MYOM3        |
| GeneCard | OSTF1        |
| GeneCard | DCD          |
| GeneCard | GALP         |
| GeneCard | SUMF2        |
| GeneCard | DPYS         |
| GeneCard | MIR188       |
| GeneCard | IGBP1        |
| GeneCard | UGP2         |
| GeneCard | TSHZ1        |
| GeneCard | SPAG6        |
| GeneCard | SCG5         |
| GeneCard | PALD1        |
| GeneCard | MARCO        |
| GeneCard | NLGN2        |
| GeneCard | RAB38        |
| GeneCard | CNTNAP5      |
| GeneCard | SEC22B       |
| GeneCard | CST6         |
| GeneCard | CALCRL       |
| GeneCard | MIR129-2     |
| GeneCard | LOC109504727 |
| GeneCard | DNAJC14      |
| GeneCard | IL34         |
| GeneCard | CXCL16       |
| GeneCard | SLC16A1      |
| GeneCard | LTB4R        |
| GeneCard | NPY2R        |
| GeneCard | ZFAND2B      |
| GeneCard | MVP          |
| GeneCard | SLC1A5       |
| GeneCard | FUNDC1       |
| GeneCard | NDUFAF7      |
| GeneCard | ADARB1       |
| GeneCard | IGFBP6       |
| GeneCard | ZFPM1        |
| GeneCard | FAT1         |

|          |              |
|----------|--------------|
| GeneCard | NDUFB7       |
| GeneCard | HTR1D        |
| GeneCard | SEC31A       |
| GeneCard | H1-5         |
| GeneCard | ORC4         |
| GeneCard | MIR138-2     |
| GeneCard | RBM45        |
| GeneCard | FLRT3        |
| GeneCard | FEZ1         |
| GeneCard | CDC34        |
| GeneCard | NFE2         |
| GeneCard | RERGL        |
| GeneCard | CHRNA9       |
| GeneCard | SYT14        |
| GeneCard | FRA10AC1     |
| GeneCard | PHOSPHO1     |
| GeneCard | RPL9         |
| GeneCard | IPO5         |
| GeneCard | TRIB3        |
| GeneCard | PDE3B        |
| GeneCard | ACAT2        |
| GeneCard | BUB3         |
| GeneCard | CD48         |
| GeneCard | JAM3         |
| GeneCard | SLC22A1      |
| GeneCard | U2AF2        |
| GeneCard | ETV1         |
| GeneCard | TEFM         |
| GeneCard | CPQ          |
| GeneCard | DMAP1        |
| GeneCard | RRS1         |
| GeneCard | LY86         |
| GeneCard | WAPL         |
| GeneCard | LRRTM1       |
| GeneCard | VWA2         |
| GeneCard | UTP4         |
| GeneCard | FAM111B      |
| GeneCard | PGRMC1       |
| GeneCard | AVPR1B       |
| GeneCard | PLA2G3       |
| GeneCard | TRIM9        |
| GeneCard | DYNLT1       |
| GeneCard | KIF2B        |
| GeneCard | INTS1        |
| GeneCard | UBXN7        |
| GeneCard | GRM4         |
| GeneCard | MRPS27       |
| GeneCard | UBE2G1       |
| GeneCard | AEBP2        |
| GeneCard | CLEC11A      |
| GeneCard | COX14        |
| GeneCard | GRIK3        |
| GeneCard | TNXA         |
| GeneCard | STX8         |
| GeneCard | JPH4         |
| GeneCard | LOC110973015 |
| GeneCard | QPRT         |
| GeneCard | UBE2J1       |



|          |           |
|----------|-----------|
| GeneCard | TBC1D7    |
| GeneCard | KIR2DS2   |
| GeneCard | SRPK2     |
| GeneCard | BZW2      |
| GeneCard | PCBP1     |
| GeneCard | RNU1-1    |
| GeneCard | MAPKAPK5  |
| GeneCard | CMYA5     |
| GeneCard | CLTB      |
| GeneCard | SP3       |
| GeneCard | IFNG-AS1  |
| GeneCard | NPL       |
| GeneCard | SLC7A1    |
| GeneCard | PIM1      |
| GeneCard | KLKB1     |
| GeneCard | GAS7      |
| GeneCard | LRG1      |
| GeneCard | UBE2I     |
| GeneCard | NAGK      |
| GeneCard | INO80     |
| GeneCard | EGLN2     |
| GeneCard | SORCS2    |
| GeneCard | AOAH      |
| GeneCard | ACTR1B    |
| GeneCard | BCAN      |
| GeneCard | KRT6C     |
| GeneCard | MTUS1     |
| GeneCard | LINC01734 |
| GeneCard | CYP26C1   |
| GeneCard | HSPB6     |
| GeneCard | SHE       |
| GeneCard | DFFB      |
| GeneCard | EFCAB6    |
| GeneCard | CDK7      |
| GeneCard | DRC7      |
| GeneCard | ADH4      |
| GeneCard | SYT12     |
| GeneCard | NIT2      |
| GeneCard | MIR24-2   |
| GeneCard | PIP4K2A   |
| GeneCard | IFIT3     |
| GeneCard | CAMKMT    |
| GeneCard | MS4A3     |
| GeneCard | PPP2R3B   |
| GeneCard | CD248     |
| GeneCard | SLC7A8    |
| GeneCard | P2RX4     |
| GeneCard | ECHDC3    |
| GeneCard | PLA2G2D   |
| GeneCard | MAP3K2    |
| GeneCard | DYNC1I2   |
| GeneCard | SLC16A9   |
| GeneCard | SORBS1    |
| GeneCard | CUL7      |
| GeneCard | MAPK8IP3  |
| GeneCard | SLC4A7    |
| GeneCard | RAB21     |
| GeneCard | CYP26B1   |

|          |          |
|----------|----------|
| GeneCard | TBC1D5   |
| GeneCard | GPM6B    |
| GeneCard | SOBP     |
| GeneCard | THADA    |
| GeneCard | MYL1     |
| GeneCard | DUSP22   |
| GeneCard | PRRC2C   |
| GeneCard | NEUROG2  |
| GeneCard | RASD1    |
| GeneCard | PIWIL1   |
| GeneCard | NAAA     |
| GeneCard | KIR2DL5A |
| GeneCard | MIR369   |
| GeneCard | TMOD2    |
| GeneCard | SPATA5   |
| GeneCard | RTRAF    |
| GeneCard | RPL36    |
| GeneCard | DDX20    |
| GeneCard | CRHR2    |
| GeneCard | PANK4    |
| GeneCard | SEMA6A   |
| GeneCard | ASAH2B   |
| GeneCard | SLC32A1  |
| GeneCard | ANXA9    |
| GeneCard | DUSP13   |
| GeneCard | WFDC2    |
| GeneCard | GCM1     |
| GeneCard | SCARA3   |
| GeneCard | MSRB3    |
| GeneCard | RPL24    |
| GeneCard | CTDSPL   |
| GeneCard | CORT     |
| GeneCard | BACH1    |
| GeneCard | PPP2R3C  |
| GeneCard | ELK1     |
| GeneCard | SIRT5    |
| GeneCard | RUNX1T1  |
| GeneCard | FBF1     |
| GeneCard | GRIK4    |
| GeneCard | TMEM132D |
| GeneCard | NR4A3    |
| GeneCard | TFB2M    |
| GeneCard | LRIG3    |
| GeneCard | NGB      |
| GeneCard | VPS26C   |
| GeneCard | SERBP1   |
| GeneCard | TUBAL3   |
| GeneCard | DIO3     |
| GeneCard | ISG20    |
| GeneCard | NFKBIB   |
| GeneCard | NT5C3A   |
| GeneCard | DUSP19   |
| GeneCard | SIM2     |
| GeneCard | CLPTM1   |
| GeneCard | STIM2    |
| GeneCard | CDC123   |
| GeneCard | CAPNS2   |
| GeneCard | PHB2     |

|          |             |
|----------|-------------|
| GeneCard | DNALI1      |
| GeneCard | GUK1        |
| GeneCard | TMPRSS4     |
| GeneCard | PARVB       |
| GeneCard | ANKK1       |
| GeneCard | LOXL4       |
| GeneCard | SLC27A2     |
| GeneCard | RNF5        |
| GeneCard | SEC31B      |
| GeneCard | CALCOCO2    |
| GeneCard | GULP1       |
| GeneCard | PPP3R2      |
| GeneCard | MIR598      |
| GeneCard | EPS8L3      |
| GeneCard | LINGO2      |
| GeneCard | IFIT2       |
| GeneCard | AKAP1       |
| GeneCard | ANAPC1      |
| GeneCard | DLX6        |
| GeneCard | PELP1       |
| GeneCard | CCNK        |
| GeneCard | CDH10       |
| GeneCard | MIR6843     |
| GeneCard | ZC3H10      |
| GeneCard | MIR874      |
| GeneCard | TUSC1       |
| GeneCard | EEF1G       |
| GeneCard | SPPL2B      |
| GeneCard | ZCCHC8      |
| GeneCard | KLK2        |
| GeneCard | NBPF3       |
| GeneCard | TSNAX-DISC1 |
| GeneCard | FXR2        |
| GeneCard | MIR873      |
| GeneCard | MRPS6       |
| GeneCard | TIMELESS    |
| GeneCard | SPPL2C      |
| GeneCard | RCAN3       |
| GeneCard | PSMB6       |
| GeneCard | ELF5        |
| GeneCard | GEMIN8      |
| GeneCard | GRB10       |
| GeneCard | RAB2A       |
| GeneCard | WDR45B      |
| GeneCard | SFN         |
| GeneCard | LILRB2      |
| GeneCard | SAT1        |
| GeneCard | KIAA1191    |
| GeneCard | IFITM3      |
| GeneCard | LMAN2L      |
| GeneCard | FZD7        |
| GeneCard | EXOSC5      |
| GeneCard | RPS8        |
| GeneCard | NEURL1      |
| GeneCard | KRTCAP2     |
| GeneCard | TSPAN2      |
| GeneCard | NTNG2       |
| GeneCard | ALDH1L1     |

|          |          |
|----------|----------|
| GeneCard | HCN2     |
| GeneCard | MMP16    |
| GeneCard | NUP54    |
| GeneCard | GGA2     |
| GeneCard | INSIG1   |
| GeneCard | RNF144A  |
| GeneCard | RNF114   |
| GeneCard | AVPR1A   |
| GeneCard | MIR181D  |
| GeneCard | TUBB8    |
| GeneCard | VCPKMT   |
| GeneCard | NDRG4    |
| GeneCard | PDIA3    |
| GeneCard | CDC37    |
| GeneCard | SFXN5    |
| GeneCard | PDE7B    |
| GeneCard | CCT8     |
| GeneCard | ILF3     |
| GeneCard | WDFY4    |
| GeneCard | MYO16    |
| GeneCard | NTSR1    |
| GeneCard | YIF1A    |
| GeneCard | COX6A2   |
| GeneCard | ESRRG    |
| GeneCard | PIK3AP1  |
| GeneCard | XRN2     |
| GeneCard | USP6NL   |
| GeneCard | PDZK1    |
| GeneCard | GEMIN7   |
| GeneCard | FABP12   |
| GeneCard | RANBP9   |
| GeneCard | PGBD1    |
| GeneCard | PPP1CA   |
| GeneCard | PKP3     |
| GeneCard | RHBDF1   |
| GeneCard | VMP1     |
| GeneCard | TK1      |
| GeneCard | ARF6     |
| GeneCard | MRPS18A  |
| GeneCard | ATP5MC3  |
| GeneCard | CENPV    |
| GeneCard | F11R     |
| GeneCard | IRAK1BP1 |
| GeneCard | PEA15    |
| GeneCard | RIPPLY2  |
| GeneCard | ZNF521   |
| GeneCard | GSTA1    |
| GeneCard | TAOK2    |
| GeneCard | TARBP2   |
| GeneCard | FTSJ3    |
| GeneCard | CCL23    |
| GeneCard | NAPEPLD  |
| GeneCard | RPS6KA2  |
| GeneCard | TYSND1   |
| GeneCard | SLC16A12 |
| GeneCard | NUMB     |
| GeneCard | SRSF5    |
| GeneCard | ARNTL2   |

|          |          |
|----------|----------|
| GeneCard | TCF19    |
| GeneCard | RNF139   |
| GeneCard | ID4      |
| GeneCard | MTCL1    |
| GeneCard | B3GALT4  |
| GeneCard | BYSL     |
| GeneCard | ARFGAP1  |
| GeneCard | PTPRA    |
| GeneCard | RNF32    |
| GeneCard | PROSER1  |
| GeneCard | TBC1D17  |
| GeneCard | ZYX      |
| GeneCard | NKAIN2   |
| GeneCard | MYH15    |
| GeneCard | SNU13    |
| GeneCard | MTF1     |
| GeneCard | ADRM1    |
| GeneCard | APOBEC3F |
| GeneCard | CCNE2    |
| GeneCard | WBP1L    |
| GeneCard | TCP1     |
| GeneCard | DIP2C    |
| GeneCard | DEPTOR   |
| GeneCard | PPRC1    |
| GeneCard | CYB561D2 |
| GeneCard | GTF2B    |
| GeneCard | MTNR1A   |
| GeneCard | LPXN     |
| GeneCard | MAP1LC3C |
| GeneCard | CD83     |
| GeneCard | IMPA2    |
| GeneCard | PRDM9    |
| GeneCard | CHPF2    |
| GeneCard | RFC3     |
| GeneCard | CSTF1    |
| GeneCard | RANBP17  |
| GeneCard | MRPL9    |
| GeneCard | SLC22A3  |
| GeneCard | SH2D1B   |
| GeneCard | LSP1     |
| GeneCard | CPT1B    |
| GeneCard | ROR1     |
| GeneCard | TIAF1    |
| GeneCard | IDI2     |
| GeneCard | UBE2V1   |
| GeneCard | CDC20    |
| GeneCard | UBA7     |
| GeneCard | DENND2B  |
| GeneCard | RHOC     |
| GeneCard | DCXR     |
| GeneCard | NPAS3    |
| GeneCard | ACIN1    |
| GeneCard | GPC2     |
| GeneCard | HEG1     |
| GeneCard | RPL22    |
| GeneCard | RIC8B    |
| GeneCard | NPLOC4   |
| GeneCard | SULF1    |

|          |          |
|----------|----------|
| GeneCard | PSMD5    |
| GeneCard | MOV10    |
| GeneCard | MEX3D    |
| GeneCard | SEPTIN12 |
| GeneCard | EEF2K    |
| GeneCard | ABCF1    |
| GeneCard | HNRNPUL1 |
| GeneCard | ENTPD7   |
| GeneCard | LIG3     |
| GeneCard | RPL14    |
| GeneCard | UBXN10   |
| GeneCard | FBP2     |
| GeneCard | MIEF1    |
| GeneCard | THTPA    |
| GeneCard | ALYREF   |
| GeneCard | GALNT12  |
| GeneCard | UCHL1-DT |
| GeneCard | PTPRK    |
| GeneCard | RPL7L1   |
| GeneCard | PTGIR    |
| GeneCard | SEC13    |
| GeneCard | MIR1275  |
| GeneCard | PAPPA2   |
| GeneCard | IGF2BP3  |
| GeneCard | MIR495   |
| GeneCard | CNTN6    |
| GeneCard | RCAN2    |
| GeneCard | MRPS14   |
| GeneCard | MAPRE1   |
| GeneCard | KHSRP    |
| GeneCard | DMTN     |
| GeneCard | H1-0     |
| GeneCard | HIPK2    |
| GeneCard | CASP14   |
| GeneCard | STX6     |
| GeneCard | MUC17    |
| GeneCard | NDUFB5   |
| GeneCard | RXRG     |
| GeneCard | EIF3A    |
| GeneCard | SLC15A2  |
| GeneCard | NDUFV3   |
| GeneCard | ADAMTS6  |
| GeneCard | POLN     |
| GeneCard | EXO1     |
| GeneCard | RPL37    |
| GeneCard | GMEB1    |
| GeneCard | ZXDC     |
| GeneCard | HEXIM1   |
| GeneCard | INKA1    |
| GeneCard | S1PR3    |
| GeneCard | POLE3    |
| GeneCard | FOXA1    |
| GeneCard | KAT2B    |
| GeneCard | MPHOSPH8 |
| GeneCard | ACKR4    |
| GeneCard | NCK1     |
| GeneCard | TRAPPC4  |
| GeneCard | SUPT16H  |

|          |           |
|----------|-----------|
| GeneCard | SLC4A1AP  |
| GeneCard | GRIK1     |
| GeneCard | USP1      |
| GeneCard | SCFD1     |
| GeneCard | VPS4A     |
| GeneCard | USP34     |
| GeneCard | SLC4A8    |
| GeneCard | ST18      |
| GeneCard | CARF      |
| GeneCard | CEP295NL  |
| GeneCard | KLF15     |
| GeneCard | CELF4     |
| GeneCard | RPS21     |
| GeneCard | PRUNE2    |
| GeneCard | F8A1      |
| GeneCard | HSPH1     |
| GeneCard | MRRF      |
| GeneCard | MRAP2     |
| GeneCard | MTMR6     |
| GeneCard | GAR1      |
| GeneCard | MRPL10    |
| GeneCard | CAND1     |
| GeneCard | MYEF2     |
| GeneCard | HMGB2     |
| GeneCard | PLK2      |
| GeneCard | RBBP4     |
| GeneCard | PDE4DIP   |
| GeneCard | PACSIN2   |
| GeneCard | PRKAR2A   |
| GeneCard | PTK7      |
| GeneCard | RPL8      |
| GeneCard | CDHR3     |
| GeneCard | DCUN1D5   |
| GeneCard | GABARAPL2 |
| GeneCard | MAPRE3    |
| GeneCard | GPAM      |
| GeneCard | TPX2      |
| GeneCard | NDUFB1    |
| GeneCard | CPEB1     |
| GeneCard | RNF212    |
| GeneCard | ELL       |
| GeneCard | FLT3LG    |
| GeneCard | FGF22     |
| GeneCard | COX7A2L   |
| GeneCard | NME2      |
| GeneCard | DOT1L     |
| GeneCard | CCNT2     |
| GeneCard | ENPEP     |
| GeneCard | ATP1A4    |
| GeneCard | RASSF5    |
| GeneCard | NCBP2     |
| GeneCard | C21orf91  |
| GeneCard | MOB2      |
| GeneCard | MELK      |
| GeneCard | MUC15     |
| GeneCard | SMG8      |
| GeneCard | SYNPO2L   |
| GeneCard | RNF182    |

|          |          |
|----------|----------|
| GeneCard | GPR84    |
| GeneCard | CFAP53   |
| GeneCard | FAM13C   |
| GeneCard | COX7A2   |
| GeneCard | SPRED2   |
| GeneCard | GSTZ1    |
| GeneCard | RSRC2    |
| GeneCard | CROT     |
| GeneCard | SLC6A12  |
| GeneCard | SFRP2    |
| GeneCard | MTRNR2L6 |
| GeneCard | PHACTR4  |
| GeneCard | KCNK5    |
| GeneCard | HRK      |
| GeneCard | ATF3     |
| GeneCard | DECR2    |
| GeneCard | ANGPT4   |
| GeneCard | PLXNA3   |
| GeneCard | AKAP12   |
| GeneCard | GPR34    |
| GeneCard | TIAM1    |
| GeneCard | NEUROD6  |
| GeneCard | CNNM1    |
| GeneCard | FSTL1    |
| GeneCard | GRID1    |
| GeneCard | TIAL1    |
| GeneCard | EPB41L3  |
| GeneCard | MAP3K11  |
| GeneCard | UBE2Q1   |
| GeneCard | RPL32    |
| GeneCard | WTAPP1   |
| GeneCard | CCNG1    |
| GeneCard | TRAF5    |
| GeneCard | IFNL1    |
| GeneCard | RAP1B    |
| GeneCard | EREG     |
| GeneCard | NEIL1    |
| GeneCard | HNRNPR   |
| GeneCard | P2RY1    |
| GeneCard | MIR802   |
| GeneCard | UBE2Z    |
| GeneCard | SEC16A   |
| GeneCard | MRPL45   |
| GeneCard | ZNF320   |
| GeneCard | EXOSC2   |
| GeneCard | MIR218-2 |
| GeneCard | RNF112   |
| GeneCard | RGS10    |
| GeneCard | CRYM     |
| GeneCard | CSN2     |
| GeneCard | CPSF6    |
| GeneCard | FES      |
| GeneCard | AHCYL1   |
| GeneCard | BAG6     |
| GeneCard | ZDHHC8   |
| GeneCard | SDF4     |
| GeneCard | RABL3    |
| GeneCard | CD200R1  |



|          |             |
|----------|-------------|
| GeneCard | VAT1L       |
| GeneCard | CDIPT       |
| GeneCard | NFATC2      |
| GeneCard | MTRNR2L5    |
| GeneCard | CISD1       |
| GeneCard | SEPTIN8     |
| GeneCard | SYTL2       |
| GeneCard | ADAMTS9-AS2 |
| GeneCard | EXOC6       |
| GeneCard | EPHA1-AS1   |
| GeneCard | EIF2AK1     |
| GeneCard | CLPTM1L     |
| GeneCard | TCF7        |
| GeneCard | GIMAP5      |
| GeneCard | MYO7B       |
| GeneCard | MRPS25      |
| GeneCard | SP2         |
| GeneCard | VWA5A       |
| GeneCard | GPR158      |
| GeneCard | NDUFB4      |
| GeneCard | ETV4        |
| GeneCard | PCGF5       |
| GeneCard | KPTN        |
| GeneCard | CBX5        |
| GeneCard | EXOSC1      |
| GeneCard | OBI1-AS1    |
| GeneCard | SCAMP1      |
| GeneCard | NBR1        |
| GeneCard | OGDHL       |
| GeneCard | ARF4        |
| GeneCard | HSD17B8     |
| GeneCard | PTGES3      |
| GeneCard | IRF2BP1     |
| GeneCard | BDH1        |
| GeneCard | SEC23IP     |
| GeneCard | ANKRD2      |
| GeneCard | DNAJA1      |
| GeneCard | SERF1A      |
| GeneCard | ANKRD13D    |
| GeneCard | DSCR8       |
| GeneCard | ACTR2       |
| GeneCard | TUBA3E      |
| GeneCard | AP1M2       |
| GeneCard | CCL25       |
| GeneCard | NMU         |
| GeneCard | MTRNR2L4    |
| GeneCard | PIK3C2G     |
| GeneCard | CAPN9       |
| GeneCard | TSPYL1      |
| GeneCard | CHRM5       |
| GeneCard | CKAP5       |
| GeneCard | IER3        |
| GeneCard | DRG1        |
| GeneCard | DAP3        |
| GeneCard | MGAT3       |
| GeneCard | CAPRIN1     |
| GeneCard | HDGF        |
| GeneCard | DUSP5       |

|          |           |
|----------|-----------|
| GeneCard | HSPA14    |
| GeneCard | MIR431    |
| GeneCard | PDLIM3    |
| GeneCard | RHOB      |
| GeneCard | MAPKAP1   |
| GeneCard | LINC01262 |
| GeneCard | ARL5B     |
| GeneCard | USP48     |
| GeneCard | ZNF2      |
| GeneCard | PRMT1     |
| GeneCard | DSCR9     |
| GeneCard | ECD       |
| GeneCard | ACSBG1    |
| GeneCard | CAPN15    |
| GeneCard | ITIH3     |
| GeneCard | NSL1      |
| GeneCard | MSI2      |
| GeneCard | RARG      |
| GeneCard | PLXDC2    |
| GeneCard | POLL      |
| GeneCard | BNIP1     |
| GeneCard | UCH1LAS   |
| GeneCard | CCT6A     |
| GeneCard | MDK       |
| GeneCard | PRDX4     |
| GeneCard | IRF2BP2   |
| GeneCard | BNIP3     |
| GeneCard | CIBAR1    |
| GeneCard | CYP21A1P  |
| GeneCard | DSTN      |
| GeneCard | ITPKB     |
| GeneCard | PSME2     |
| GeneCard | DEFA1     |
| GeneCard | SLC8A3    |
| GeneCard | KIN       |
| GeneCard | NPY4R     |
| GeneCard | ITGB1BP1  |
| GeneCard | SSTR4     |
| GeneCard | STAMBP    |
| GeneCard | GABRA4    |
| GeneCard | NDUFA7    |
| GeneCard | PMAIP1    |
| GeneCard | SRSF4     |
| GeneCard | MPP1      |
| GeneCard | DYDC1     |
| GeneCard | RAB4B     |
| GeneCard | STEEP1    |
| GeneCard | KCNN1     |
| GeneCard | EPDR1     |
| GeneCard | SLC6A17   |
| GeneCard | BAG5      |
| GeneCard | KATNAL2   |
| GeneCard | RPL29     |
| GeneCard | TECTB     |
| GeneCard | RPS6KA5   |
| GeneCard | USP25     |
| GeneCard | CLK3      |
| GeneCard | EIF2S2    |

|          |              |
|----------|--------------|
| GeneCard | BVES         |
| GeneCard | TP53INP1     |
| GeneCard | NME9         |
| GeneCard | PYM1         |
| GeneCard | OSBPL7       |
| GeneCard | MIR769       |
| GeneCard | SNX4         |
| GeneCard | H2BS1        |
| GeneCard | APCDD1       |
| GeneCard | LOC109461478 |
| GeneCard | S100A11      |
| GeneCard | CRYBA2       |
| GeneCard | ZBP1         |
| GeneCard | CLEC3B       |
| GeneCard | MIR30C2      |
| GeneCard | KRI1         |
| GeneCard | ZNF558       |
| GeneCard | BRD3         |
| GeneCard | PIAS1        |
| GeneCard | JUND         |
| GeneCard | LASP1        |
| GeneCard | AQR          |
| GeneCard | PLD2         |
| GeneCard | ZNF180       |
| GeneCard | NOP2         |
| GeneCard | CLTCL1       |
| GeneCard | PLRG1        |
| GeneCard | TSC22D3      |
| GeneCard | PSME3        |
| GeneCard | DDX23        |
| GeneCard | LINC02914    |
| GeneCard | EIF4B        |
| GeneCard | MCEE         |
| GeneCard | FOXL1        |
| GeneCard | OLAH         |
| GeneCard | DYDC2        |
| GeneCard | TRIM24       |
| GeneCard | GPLD1        |
| GeneCard | NOVA1        |
| GeneCard | MIR512-1     |
| GeneCard | KAT8         |
| GeneCard | GABRG1       |
| GeneCard | PRKAB2       |
| GeneCard | LOC100287944 |
| GeneCard | H3C14        |
| GeneCard | PALM         |
| GeneCard | NPTX1        |
| GeneCard | DSCR4        |
| GeneCard | RAB3D        |
| GeneCard | DHRS9        |
| GeneCard | TLL2         |
| GeneCard | FHL3         |
| GeneCard | GPSM3        |
| GeneCard | PKP4         |
| GeneCard | HTT-AS       |
| GeneCard | NLRP2        |
| GeneCard | ACSL6        |
| GeneCard | NUAK1        |

|          |              |
|----------|--------------|
| GeneCard | CLRN3        |
| GeneCard | STAU1        |
| GeneCard | LOC111365141 |
| GeneCard | ARHGAP15     |
| GeneCard | E2F8         |
| GeneCard | FMR1-AS1     |
| GeneCard | CHRNA6       |
| GeneCard | GRPR         |
| GeneCard | PRMT5        |
| GeneCard | DDX5         |
| GeneCard | SCOC-AS1     |
| GeneCard | GIMAP4       |
| GeneCard | NPY1R        |
| GeneCard | FCER1G       |
| GeneCard | SLC2A14      |
| GeneCard | TOM1         |
| GeneCard | MT-TC        |
| GeneCard | NRAP         |
| GeneCard | MYO10        |
| GeneCard | SLC28A1      |
| GeneCard | RPL36A       |
| GeneCard | E2F5         |
| GeneCard | DHX8         |
| GeneCard | SAP30L       |
| GeneCard | CAMK2N2      |
| GeneCard | MAD2L1       |
| GeneCard | DCLK1        |
| GeneCard | RMND5B       |
| GeneCard | CCAR2        |
| GeneCard | SLC30A2      |
| GeneCard | DTHD1        |
| GeneCard | SQOR         |
| GeneCard | ERP44        |
| GeneCard | SRPK1        |
| GeneCard | EEFSEC       |
| GeneCard | PLEKHG1      |
| GeneCard | SMPD3        |
| GeneCard | NAPSA        |
| GeneCard | MIR4422HG    |
| GeneCard | DMRTA1       |
| GeneCard | SLC25A38     |
| GeneCard | GNAZ         |
| GeneCard | RBMS1        |
| GeneCard | IGF2BP1      |
| GeneCard | CYB5B        |
| GeneCard | PRPSAP2      |
| GeneCard | SCIMP        |
| GeneCard | SELENOS      |
| GeneCard | CALML4       |
| GeneCard | C4BPB        |
| GeneCard | GCNT2        |
| GeneCard | MRPL39       |
| GeneCard | PNPLA7       |
| GeneCard | FZD9         |
| GeneCard | ZPBP         |
| GeneCard | LGALS8       |
| GeneCard | TDRD10       |
| GeneCard | RCC1L        |

|          |              |
|----------|--------------|
| GeneCard | TREML1       |
| GeneCard | E2F7         |
| GeneCard | USP2         |
| GeneCard | RNF115       |
| GeneCard | PPP2CB       |
| GeneCard | PCSK7        |
| GeneCard | SCAF4        |
| GeneCard | HKDC1        |
| GeneCard | LINC01194    |
| GeneCard | NAALADL2     |
| GeneCard | GRIK5        |
| GeneCard | HRC          |
| GeneCard | METTL8       |
| GeneCard | E2F6         |
| GeneCard | KNSTRN       |
| GeneCard | ZBTB38       |
| GeneCard | MIR520C      |
| GeneCard | MDM4         |
| GeneCard | CHD6         |
| GeneCard | SLC2A13      |
| GeneCard | DMXL1        |
| GeneCard | AP3M1        |
| GeneCard | TRMT1L       |
| GeneCard | CALHM2       |
| GeneCard | HNRNPD       |
| GeneCard | LOC108660406 |
| GeneCard | CALHM3       |
| GeneCard | MIR9-2       |
| GeneCard | XAB2         |
| GeneCard | EIF6         |
| GeneCard | NELFE        |
| GeneCard | TRUB1        |
| GeneCard | LCP2         |
| GeneCard | SORBS3       |
| GeneCard | LRIT1        |
| GeneCard | PDCL         |
| GeneCard | BASP1        |
| GeneCard | DCLRE1B      |
| GeneCard | ARFGAP3      |
| GeneCard | MEF2D        |
| GeneCard | RPL26L1      |
| GeneCard | MYOF         |
| GeneCard | PRKAG3       |
| GeneCard | COX7A1       |
| GeneCard | TVP23A       |
| GeneCard | DOCK4        |
| GeneCard | PALMD        |
| GeneCard | MRPL28       |
| GeneCard | RPL18A       |
| GeneCard | BMX          |
| GeneCard | PPP1CC       |
| GeneCard | FRK          |
| GeneCard | PPP1R12A     |
| GeneCard | MYLPF        |
| GeneCard | TSNAX        |
| GeneCard | HDAC10       |
| GeneCard | WRAP73       |
| GeneCard | SLC4A3       |

|          |              |
|----------|--------------|
| GeneCard | TXNDC12      |
| GeneCard | PABPC4       |
| GeneCard | PPP2R5E      |
| GeneCard | EIF1AX       |
| GeneCard | TMCO4        |
| GeneCard | FPR1         |
| GeneCard | NOLC1        |
| GeneCard | TMEM147      |
| GeneCard | TSHZ2        |
| GeneCard | NMB          |
| GeneCard | HSD17B13     |
| GeneCard | SEZ6L2       |
| GeneCard | BBC3         |
| GeneCard | NAP1L1       |
| GeneCard | TREML4       |
| GeneCard | SRBD1        |
| GeneCard | FBXO42       |
| GeneCard | SLC6A13      |
| GeneCard | SRI          |
| GeneCard | MRPS28       |
| GeneCard | MIR3200      |
| GeneCard | CD93         |
| GeneCard | ATP5MC2      |
| GeneCard | IQGAP2       |
| GeneCard | NOL3         |
| GeneCard | PADI3        |
| GeneCard | POLR2H       |
| GeneCard | ULK4         |
| GeneCard | MYOZ1        |
| GeneCard | NKX6-2       |
| GeneCard | IFIT1        |
| GeneCard | PTGFR        |
| GeneCard | SFXN2        |
| GeneCard | SYPL2        |
| GeneCard | ADCY3        |
| GeneCard | AKR1C1       |
| GeneCard | CUEDC2       |
| GeneCard | RPL36AL      |
| GeneCard | TMEM30A      |
| GeneCard | LOC108660405 |
| GeneCard | GTF2H1       |
| GeneCard | PTPRU        |
| GeneCard | EGLN3        |
| GeneCard | TBPL1        |
| GeneCard | GIMAP2       |
| GeneCard | ID1          |
| GeneCard | DYNLL2       |
| GeneCard | SLF2         |
| GeneCard | VPS28        |
| GeneCard | ANKRD22      |
| GeneCard | CSGALNACT2   |
| GeneCard | CARM1        |
| GeneCard | TSR1         |
| GeneCard | BPNT2        |
| GeneCard | RPL23A       |
| GeneCard | MIA3         |
| GeneCard | MIR135A2     |
| GeneCard | TSPAN15      |

|          |              |
|----------|--------------|
| GeneCard | UQCR11       |
| GeneCard | NDUFB2       |
| GeneCard | CADM2        |
| GeneCard | LIN7A        |
| GeneCard | RETREG3      |
| GeneCard | PLEKHG2      |
| GeneCard | LOC109623489 |
| GeneCard | NCAPD3       |
| GeneCard | LIMD1        |
| GeneCard | MCM10        |
| GeneCard | LAPTM4A      |
| GeneCard | SEPHS1       |
| GeneCard | EFR3A        |
| GeneCard | NUCKS1       |
| GeneCard | ITSN2        |
| GeneCard | AGAP1        |
| GeneCard | GLRX3        |
| GeneCard | HPCAL1       |
| GeneCard | CCDC85C      |
| GeneCard | MIR103A2     |
| GeneCard | MLF1         |
| GeneCard | PHAX         |
| GeneCard | ARHGAP20     |
| GeneCard | TMEM59       |
| GeneCard | PLCL1        |
| GeneCard | TPBG         |
| GeneCard | DYNC111      |
| GeneCard | TACC2        |
| GeneCard | UPF2         |
| GeneCard | RABEP2       |
| GeneCard | NCDN         |
| GeneCard | KCTD2        |
| GeneCard | SELENOO      |
| GeneCard | NIF3L1       |
| GeneCard | GTF2H3       |
| GeneCard | TRPM2        |
| GeneCard | PFDN1        |
| GeneCard | NCK2         |
| GeneCard | NOC2L        |
| GeneCard | ABL2         |
| GeneCard | RAB27B       |
| GeneCard | RBM15        |
| GeneCard | USE1         |
| GeneCard | RPE          |
| GeneCard | H3C6         |
| GeneCard | SLC27A1      |
| GeneCard | DDX18        |
| GeneCard | MACIR        |
| GeneCard | PSD          |
| GeneCard | ADD2         |
| GeneCard | STK25        |
| GeneCard | LIPM         |
| GeneCard | SNRNP40      |
| GeneCard | POLR2K       |
| GeneCard | PPARGC1B     |
| GeneCard | WASF2        |
| GeneCard | BCAR3        |
| GeneCard | BAIAP2L1     |

|          |          |
|----------|----------|
| GeneCard | CACNG3   |
| GeneCard | SESN2    |
| GeneCard | CALY     |
| GeneCard | IKZF4    |
| GeneCard | HECW1    |
| GeneCard | RPL37A   |
| GeneCard | PTPRF    |
| GeneCard | STX5     |
| GeneCard | EFNA3    |
| GeneCard | PTPRT    |
| GeneCard | MAP4     |
| GeneCard | TGFB1I1  |
| GeneCard | GEMIN5   |
| GeneCard | TSPAN8   |
| GeneCard | APOO     |
| GeneCard | PRIM1    |
| GeneCard | SLC25A27 |
| GeneCard | NKAP     |
| GeneCard | OXSRI    |
| GeneCard | GADD45G  |
| GeneCard | RYBP     |
| GeneCard | ACSL5    |
| GeneCard | LSAMP    |
| GeneCard | ENTPD5   |
| GeneCard | IL4I1    |
| GeneCard | GSPT2    |
| GeneCard | MIR410   |
| GeneCard | CSMD2    |
| GeneCard | MRPL16   |
| GeneCard | AGAP3    |
| GeneCard | VSTM4    |
| GeneCard | ATG2A    |
| GeneCard | SCAMP5   |
| GeneCard | QPCTL    |
| GeneCard | PPP2R5C  |
| GeneCard | CUTA     |
| GeneCard | AGO1     |
| GeneCard | BLID     |
| GeneCard | KIAA0825 |
| GeneCard | SF3B3    |
| GeneCard | UBE2W    |
| GeneCard | COX7C    |
| GeneCard | DNAH14   |
| GeneCard | CERK     |
| GeneCard | CFAP70   |
| GeneCard | GRK6     |
| GeneCard | TSN      |
| GeneCard | FNBP1    |
| GeneCard | IFRD2    |
| GeneCard | CXXC1    |
| GeneCard | SERPINB9 |
| GeneCard | ZFP90    |
| GeneCard | RRP15    |
| GeneCard | AQP9     |
| GeneCard | ZMYM3    |
| GeneCard | ERI3     |
| GeneCard | STXBP6   |
| GeneCard | TARBP1   |



|          |           |
|----------|-----------|
| GeneCard | ABCC11    |
| GeneCard | TIGD1     |
| GeneCard | FBXW4     |
| GeneCard | SLIRP     |
| GeneCard | MIER1     |
| GeneCard | SART1     |
| GeneCard | MRT04     |
| GeneCard | EIF3B     |
| GeneCard | RRP1B     |
| GeneCard | MPRIP     |
| GeneCard | DSCR10    |
| GeneCard | HES1      |
| GeneCard | FAAP24    |
| GeneCard | USP10     |
| GeneCard | INKA2     |
| GeneCard | DXO       |
| GeneCard | KIFC3     |
| GeneCard | MRPL43    |
| GeneCard | ACSL3     |
| GeneCard | RUVBL2    |
| GeneCard | HYAL2     |
| GeneCard | USP18     |
| GeneCard | FAM215A   |
| GeneCard | TRIM26    |
| GeneCard | ARHGEF1   |
| GeneCard | CDC42SE2  |
| GeneCard | ANAPC13   |
| GeneCard | LINC00271 |
| GeneCard | LHPP      |
| GeneCard | FGFBP2    |
| GeneCard | HID1      |
| GeneCard | UQCRH     |
| GeneCard | CEP170    |
| GeneCard | PIP4K2C   |
| GeneCard | RAB5C     |
| GeneCard | SYNGR1    |
| GeneCard | EPC2      |
| GeneCard | CXCL14    |
| GeneCard | CSDE1     |
| GeneCard | MS        |
| GeneCard | LINC01567 |
| GeneCard | MED30     |
| GeneCard | GGH       |
| GeneCard | CHD5      |
| GeneCard | MEPCE     |
| GeneCard | NUDT16L1  |
| GeneCard | TTLL7     |
| GeneCard | SND1      |
| GeneCard | ASPSCR1   |
| GeneCard | SLC39A12  |
| GeneCard | NCALD     |
| GeneCard | SAV1      |
| GeneCard | ANP32B    |
| GeneCard | C4B_2     |
| GeneCard | TNMD      |
| GeneCard | CETN2     |
| GeneCard | LDLRAD2   |
| GeneCard | WIPI2     |

|          |               |
|----------|---------------|
| GeneCard | VTI1A         |
| GeneCard | LINC00316     |
| GeneCard | CHMP3         |
| GeneCard | MAGI1         |
| GeneCard | COX8C         |
| GeneCard | TAX1BP3       |
| GeneCard | CMKLR1        |
| GeneCard | TRIB2         |
| GeneCard | MPST          |
| GeneCard | PURB          |
| GeneCard | IL22RA1       |
| GeneCard | ZSCAN25       |
| GeneCard | CLDN18        |
| GeneCard | LMTK2         |
| GeneCard | PKNOX2        |
| GeneCard | CDK18         |
| GeneCard | A3GALT2       |
| GeneCard | TPTEP2-CSNK1E |
| GeneCard | DNAJC7        |
| GeneCard | FHL5          |
| GeneCard | OSBPL6        |
| GeneCard | CHN2          |
| GeneCard | AFDN          |
| GeneCard | STYX          |
| GeneCard | NMT2          |
| GeneCard | CSN3          |
| GeneCard | CPSF4         |
| GeneCard | RNF185        |
| GeneCard | PDIA4         |
| GeneCard | TKTL1         |
| GeneCard | TUT1          |
| GeneCard | RAB3C         |
| GeneCard | SOX7          |
| GeneCard | ELOA          |
| GeneCard | MIR488        |
| GeneCard | MAGEA4        |
| GeneCard | MLEC          |
| GeneCard | MLLT3         |
| GeneCard | KCNK18        |
| GeneCard | ELOVL6        |
| GeneCard | CDC23         |
| GeneCard | SERF1B        |
| GeneCard | SOX14         |
| GeneCard | KPNA4         |
| GeneCard | SH3GLB1       |
| GeneCard | ECRG4         |
| GeneCard | ADAM15        |
| GeneCard | HLA-DRB9      |
| GeneCard | MIR155HG      |
| GeneCard | SYNJ2BP       |
| GeneCard | UBXN11        |
| GeneCard | OFCC1         |
| GeneCard | BHMT2         |
| GeneCard | CWC15         |
| GeneCard | RPP30         |
| GeneCard | WDR7          |
| GeneCard | FAM131B       |
| GeneCard | CD74          |

|          |           |
|----------|-----------|
| GeneCard | TRMO      |
| GeneCard | BBX       |
| GeneCard | LHX8      |
| GeneCard | PLXNA4    |
| GeneCard | CDK11B    |
| GeneCard | UBE2L6    |
| GeneCard | BTN3A2    |
| GeneCard | FBH1      |
| GeneCard | ARL1      |
| GeneCard | CPM       |
| GeneCard | ENAH      |
| GeneCard | ZNF45     |
| GeneCard | ANO4      |
| GeneCard | ZNF594-DT |
| GeneCard | NMT1      |
| GeneCard | KYAT1     |
| GeneCard | SF3B6     |
| GeneCard | SLK       |
| GeneCard | KIFC1     |
| GeneCard | PPP1R37   |
| GeneCard | MIR101-2  |
| GeneCard | RBM12     |
| GeneCard | MTRNR2L8  |
| GeneCard | SBNO2     |
| GeneCard | CCAR1     |
| GeneCard | CIP2A     |
| GeneCard | SSH1      |
| GeneCard | TBRG1     |
| GeneCard | PTPRZ1    |
| GeneCard | RASSF8    |
| GeneCard | VAMP8     |
| GeneCard | ATP6V1G1  |
| GeneCard | GPR15     |
| GeneCard | NDST2     |
| GeneCard | COIL      |
| GeneCard | BAALC     |
| GeneCard | TRIM11    |
| GeneCard | MED8      |
| GeneCard | LRRFIP1   |
| GeneCard | SNAP23    |
| GeneCard | C6orf58   |
| GeneCard | GNPNAT1   |
| GeneCard | SLC25A31  |
| GeneCard | NDUFC1    |
| GeneCard | LHFPL2    |
| GeneCard | MAGOHB    |
| GeneCard | GDI2      |
| GeneCard | MESP1     |
| GeneCard | GMFB      |
| GeneCard | NOP14     |
| GeneCard | TAF11     |
| GeneCard | GALR1     |
| GeneCard | ATP2B4    |
| GeneCard | TNFAIP1   |
| GeneCard | CDCA5     |
| GeneCard | ALG10     |
| GeneCard | SREK1     |
| GeneCard | TMBIM6    |

|          |          |
|----------|----------|
| GeneCard | GNB1L    |
| GeneCard | MIR876   |
| GeneCard | ATP6V1H  |
| GeneCard | DCLRE1A  |
| GeneCard | CLIC4    |
| GeneCard | PAXIP1   |
| GeneCard | RPL34    |
| GeneCard | PDIA6    |
| GeneCard | SURF4    |
| GeneCard | PTGES2   |
| GeneCard | ZNF346   |
| GeneCard | APOF     |
| GeneCard | MAGEA3   |
| GeneCard | NFYA     |
| GeneCard | CMKLR2   |
| GeneCard | DACH1    |
| GeneCard | SLC36A1  |
| GeneCard | ANP32A   |
| GeneCard | MFAP4    |
| GeneCard | CLSTN2   |
| GeneCard | SORBS2   |
| GeneCard | TANK     |
| GeneCard | NRBP1    |
| GeneCard | SCAF11   |
| GeneCard | CAMTA2   |
| GeneCard | RBM39    |
| GeneCard | MSBP2    |
| GeneCard | IK       |
| GeneCard | ZNF276   |
| GeneCard | ITPK1    |
| GeneCard | TEX2     |
| GeneCard | MTMR4    |
| GeneCard | CHRNA10  |
| GeneCard | TSSC4    |
| GeneCard | RPL41    |
| GeneCard | TSPAN9   |
| GeneCard | MYH13    |
| GeneCard | MTCH2    |
| GeneCard | H1-1     |
| GeneCard | CRLF3    |
| GeneCard | PDIA2    |
| GeneCard | RASSF4   |
| GeneCard | ABCA13   |
| GeneCard | BCLAF1   |
| GeneCard | MBD1     |
| GeneCard | MTERF4   |
| GeneCard | CDK5R2   |
| GeneCard | TRAPPC6A |
| GeneCard | NNAT     |
| GeneCard | GAL3ST1  |
| GeneCard | CHDH     |
| GeneCard | FZD10    |
| GeneCard | RINT1    |
| GeneCard | KCNC4    |
| GeneCard | ACTR3    |
| GeneCard | KRR1     |
| GeneCard | COX17    |
| GeneCard | POC1A    |

|          |                 |
|----------|-----------------|
| GeneCard | LUC7L           |
| GeneCard | SH2D4B          |
| GeneCard | HSPB11          |
| GeneCard | SLC48A1         |
| GeneCard | AGFG2           |
| GeneCard | NET1            |
| GeneCard | SWAP70          |
| GeneCard | DYRK2           |
| GeneCard | ZFYVE9          |
| GeneCard | LPIN3           |
| GeneCard | SMU1            |
| GeneCard | MYO1G           |
| GeneCard | SAMD5           |
| GeneCard | PLXNA2          |
| GeneCard | DIO1            |
| GeneCard | ID3             |
| GeneCard | RBL2            |
| GeneCard | GPR141          |
| GeneCard | RBMS2           |
| GeneCard | ITM2A           |
| GeneCard | RBM3            |
| GeneCard | ADCYAP1R1       |
| GeneCard | NIP7            |
| GeneCard | PIP5K1A         |
| GeneCard | ENSG00000273516 |
| GeneCard | PCNX1           |
| GeneCard | C17orf67        |
| GeneCard | MTERF1          |
| GeneCard | CRMP1           |
| GeneCard | PHACTR2         |
| GeneCard | MRPS31          |
| GeneCard | API5            |
| GeneCard | BLOC1S2         |
| GeneCard | ALDH16A1        |
| GeneCard | VEZF1           |
| GeneCard | MYG1            |
| GeneCard | FAM50A          |
| GeneCard | MAP4K4          |
| GeneCard | DPCD            |
| GeneCard | ZWINT           |
| GeneCard | SPINT1          |
| GeneCard | RHOBTB1         |
| GeneCard | SULT4A1         |
| GeneCard | SEPTIN6         |
| GeneCard | APLF            |
| GeneCard | MATK            |
| GeneCard | WIF1            |
| GeneCard | LOC642361       |
| GeneCard | BIRC7           |
| GeneCard | MRPL11          |
| GeneCard | PCOLCE          |
| GeneCard | LINC00917       |
| GeneCard | SDCBP           |
| GeneCard | SMOX            |
| GeneCard | TRIM4           |
| GeneCard | CPXM2           |
| GeneCard | MRPS26          |
| GeneCard | TCERG1L         |

|          |          |
|----------|----------|
| GeneCard | MIR3176  |
| GeneCard | PTP4A1   |
| GeneCard | NFATC4   |
| GeneCard | LIPC-AS1 |
| GeneCard | GPR50    |
| GeneCard | LONRF3   |
| GeneCard | UVRAG    |
| GeneCard | USP30    |
| GeneCard | HTR1E    |
| GeneCard | AP1G1    |
| GeneCard | PTP4A2   |
| GeneCard | SAFB     |
| GeneCard | TSPAN13  |
| GeneCard | PEG10    |
| GeneCard | CHMP4A   |
| GeneCard | CKAP4    |
| GeneCard | ENSA     |
| GeneCard | IMPDH2   |
| GeneCard | MDGA2    |
| GeneCard | SLC2A8   |
| GeneCard | AAMP     |
| GeneCard | NOP53    |
| GeneCard | CCDC141  |
| GeneCard | DUS3L    |
| GeneCard | NDUFA4L2 |
| GeneCard | TSPAN32  |
| GeneCard | SNRPA1   |
| GeneCard | RNPS1    |
| GeneCard | TTC5     |
| GeneCard | ACLY     |
| GeneCard | RPL17    |
| GeneCard | TLE3     |
| GeneCard | HSPA12A  |
| GeneCard | H3-4     |
| GeneCard | ADAM30   |
| GeneCard | SFSWAP   |
| GeneCard | PHYKPL   |
| GeneCard | DYNLRB2  |
| GeneCard | CD53     |
| GeneCard | PIP4P1   |
| GeneCard | SV2C     |
| GeneCard | TOM1L2   |
| GeneCard | NME3     |
| GeneCard | TOPBP1   |
| GeneCard | ZFP36    |
| GeneCard | POLR2I   |
| GeneCard | AKR7L    |
| GeneCard | UBE2J2   |
| GeneCard | UBR3     |
| GeneCard | PDCD6    |
| GeneCard | TOX      |
| GeneCard | TRIP10   |
| GeneCard | TRAF4    |
| GeneCard | CHRNB3   |
| GeneCard | MPP3     |
| GeneCard | NEK11    |
| GeneCard | IPMK     |
| GeneCard | SNRPB2   |

|          |              |
|----------|--------------|
| GeneCard | GET3         |
| GeneCard | GPM6A        |
| GeneCard | NOA1         |
| GeneCard | TCEA1        |
| GeneCard | GIMAP6       |
| GeneCard | RTKN2        |
| GeneCard | MORF4L1      |
| GeneCard | MZF1         |
| GeneCard | MGAT5        |
| GeneCard | SMTNL2       |
| GeneCard | FBXL5        |
| GeneCard | CRTAC1       |
| GeneCard | MIR124-1HG   |
| GeneCard | RGCC         |
| GeneCard | HINT2        |
| GeneCard | LRIF1        |
| GeneCard | RAD1         |
| GeneCard | TIPIN        |
| GeneCard | S100G        |
| GeneCard | PDE7A        |
| GeneCard | ARHGAP21     |
| GeneCard | SHB          |
| GeneCard | ZNF326       |
| GeneCard | UTP25        |
| GeneCard | YIPF1        |
| GeneCard | RRBP1        |
| GeneCard | VPS37C       |
| GeneCard | EXOC3L4      |
| GeneCard | RANBP1       |
| GeneCard | IRGC         |
| GeneCard | ATXN7L1      |
| GeneCard | TSPOAP1      |
| GeneCard | DNAJC1       |
| GeneCard | DNAJA3       |
| GeneCard | CA6          |
| GeneCard | ATF1         |
| GeneCard | TAGLN2       |
| GeneCard | IFNA21       |
| GeneCard | URI1         |
| GeneCard | TRIM27       |
| GeneCard | POP7         |
| GeneCard | STRAP        |
| GeneCard | TLE6         |
| GeneCard | TMEM217      |
| GeneCard | ALKBH8       |
| GeneCard | PEDS1        |
| GeneCard | CDCA4        |
| GeneCard | TIMM23       |
| GeneCard | LOC105374344 |
| GeneCard | RNPEPL1      |
| GeneCard | PWP1         |
| GeneCard | FXVD6-FXYD2  |
| GeneCard | REEP4        |
| GeneCard | CCT4         |
| GeneCard | KANSL2       |
| GeneCard | LCORL        |
| GeneCard | CLDND1       |
| GeneCard | SRRM1        |

|          |           |
|----------|-----------|
| GeneCard | RFX3      |
| GeneCard | MYL6      |
| GeneCard | TMEM97    |
| GeneCard | PA2G4     |
| GeneCard | SETD7     |
| GeneCard | UBE2D3    |
| GeneCard | ERC1      |
| GeneCard | MEF2C-AS1 |
| GeneCard | RUSC1-AS1 |
| GeneCard | WTAP      |
| GeneCard | NUDT13    |
| GeneCard | RPAP3     |
| GeneCard | PPP1R35   |
| GeneCard | NPDC1     |
| GeneCard | CBLC      |
| GeneCard | ATRNL1    |
| GeneCard | GGA1      |
| GeneCard | POLR1H    |
| GeneCard | SIRPB1    |
| GeneCard | IFIT5     |
| GeneCard | ZC3HAV1   |
| GeneCard | TRAF3IP3  |
| GeneCard | S100A10   |
| GeneCard | NSG2      |
| GeneCard | HNRNPH3   |
| GeneCard | MIR1307   |
| GeneCard | RAI14     |
| GeneCard | FRYL      |
| GeneCard | CBX1      |
| GeneCard | SPDEF     |
| GeneCard | ZNF532    |
| GeneCard | SGK3      |
| GeneCard | P2RX6     |
| GeneCard | APOBEC3A  |
| GeneCard | HCLS1     |
| GeneCard | TRPT1     |
| GeneCard | CABCOC01  |
| GeneCard | BRD1      |
| GeneCard | SPINK2    |
| GeneCard | KCNIP4    |
| GeneCard | PPP1R13B  |
| GeneCard | GMDS      |
| GeneCard | CASTOR3   |
| GeneCard | USP9Y     |
| GeneCard | LSR       |
| GeneCard | SYT17     |
| GeneCard | TFPT      |
| GeneCard | P4HA1     |
| GeneCard | YJU2      |
| GeneCard | FAAP100   |
| GeneCard | PARVA     |
| GeneCard | GOLIM4    |
| GeneCard | TRIM44    |
| GeneCard | ALDOC     |
| GeneCard | EFS       |
| GeneCard | SHANK1    |
| GeneCard | GRID2IP   |
| GeneCard | YTHDF2    |



|          |           |
|----------|-----------|
| GeneCard | RGS14     |
| GeneCard | MED31     |
| GeneCard | DDX19B    |
| GeneCard | SH3BP5    |
| GeneCard | SMC4      |
| GeneCard | ABCA8     |
| GeneCard | PKN1      |
| GeneCard | TPD52L2   |
| GeneCard | MNS1      |
| GeneCard | SUPT7L    |
| GeneCard | PRPF40A   |
| GeneCard | SNAPIN    |
| GeneCard | LYAR      |
| GeneCard | RPP38     |
| GeneCard | PRPF38A   |
| GeneCard | GPN1      |
| GeneCard | CEP76     |
| GeneCard | CACNA2D3  |
| GeneCard | RPUSD3    |
| GeneCard | BAZ2A     |
| GeneCard | PPP4R3A   |
| GeneCard | SRRM2     |
| GeneCard | SCN7A     |
| GeneCard | CBFA2T2   |
| GeneCard | ERCC6L    |
| GeneCard | CINP      |
| GeneCard | CNOT8     |
| GeneCard | C1QTNF3   |
| GeneCard | EIF3I     |
| GeneCard | EDEM1     |
| GeneCard | LINC00461 |
| GeneCard | KIF20B    |
| GeneCard | SUB1      |
| GeneCard | C12orf75  |
| GeneCard | COX7B2    |
| GeneCard | PACSIN1   |
| GeneCard | SENP1     |
| GeneCard | UTS2B     |
| GeneCard | ACAD10    |
| GeneCard | ACAA2     |
| GeneCard | ATG2B     |
| GeneCard | LZTS2     |
| GeneCard | ABLIM1    |
| GeneCard | FXVD7     |
| GeneCard | MAP3K14   |
| GeneCard | C14orf39  |
| GeneCard | SFMBT1    |
| GeneCard | PDE8A     |
| GeneCard | PHF14     |
| GeneCard | MCPH1-AS1 |
| GeneCard | SPON2     |
| GeneCard | CCDC33    |
| GeneCard | SPAG7     |
| GeneCard | ZNF248    |
| GeneCard | EXOC5     |
| GeneCard | OLFM4     |
| GeneCard | NAA25     |
| GeneCard | ELOVL2    |

|          |          |
|----------|----------|
| GeneCard | EFHD1    |
| GeneCard | NDRG3    |
| GeneCard | GPANK1   |
| GeneCard | KSR2     |
| GeneCard | OSTN     |
| GeneCard | USP11    |
| GeneCard | PUM3     |
| GeneCard | GABPA    |
| GeneCard | PTPRE    |
| GeneCard | ERO1A    |
| GeneCard | C5orf64  |
| GeneCard | EP400P1  |
| GeneCard | SEC24A   |
| GeneCard | GPRC6A   |
| GeneCard | HACD3    |
| GeneCard | S100A5   |
| GeneCard | REEP3    |
| GeneCard | ANKS1A   |
| GeneCard | KNOP1    |
| GeneCard | DNAJA2   |
| GeneCard | WDR46    |
| GeneCard | B4GALNT2 |
| GeneCard | KPNA3    |
| GeneCard | ZNF703   |
| GeneCard | SGTB     |
| GeneCard | PLPP4    |
| GeneCard | SVEP1    |
| GeneCard | TMOD4    |
| GeneCard | ATE1     |
| GeneCard | PTPRS    |
| GeneCard | DUSP3    |
| GeneCard | ASH2L    |
| GeneCard | MNAT1    |
| GeneCard | KCNA10   |
| GeneCard | CCZ1B    |
| GeneCard | ZNF22    |
| GeneCard | OAS2     |
| GeneCard | CNDP2    |
| GeneCard | TFIP11   |
| GeneCard | MIR887   |
| GeneCard | TRMT2A   |
| GeneCard | SUMO2    |
| GeneCard | HLA-DRB6 |
| GeneCard | ATP1B2   |
| GeneCard | AMIGO2   |
| GeneCard | EDIL3    |
| GeneCard | MYRIP    |
| GeneCard | MIR760   |
| GeneCard | YTHDF1   |
| GeneCard | H3C12    |
| GeneCard | MRPS30   |
| GeneCard | SRPRB    |
| GeneCard | SMURF1   |
| GeneCard | SAFB2    |
| GeneCard | EXOSC4   |
| GeneCard | CCDC120  |
| GeneCard | NKRF     |
| GeneCard | TEN1     |

|          |          |
|----------|----------|
| GeneCard | FNBP4    |
| GeneCard | MARCHF5  |
| GeneCard | ESRP1    |
| GeneCard | APOBEC2  |
| GeneCard | RFC5     |
| GeneCard | ZNF225   |
| GeneCard | USP35    |
| GeneCard | RSL1D1   |
| GeneCard | MRPS12   |
| GeneCard | MAP6     |
| GeneCard | PGD      |
| GeneCard | HDLBP    |
| GeneCard | CPSF1    |
| GeneCard | LBHD1    |
| GeneCard | YTHDC1   |
| GeneCard | KIF2C    |
| GeneCard | HAUS3    |
| GeneCard | BRMS1    |
| GeneCard | LAIR1    |
| GeneCard | TMEM94   |
| GeneCard | ZYG11B   |
| GeneCard | FAF2     |
| GeneCard | CALU     |
| GeneCard | UFC1     |
| GeneCard | PPIH     |
| GeneCard | GPR78    |
| GeneCard | NECAB1   |
| GeneCard | USO1     |
| GeneCard | MIR190A  |
| GeneCard | EPB41L2  |
| GeneCard | ADGRL2   |
| GeneCard | STARD4   |
| GeneCard | TRDMT1   |
| GeneCard | ASIP     |
| GeneCard | SLC7A11  |
| GeneCard | TTK      |
| GeneCard | PRAM1    |
| GeneCard | SLC38A10 |
| GeneCard | EBF1     |
| GeneCard | FAM3C    |
| GeneCard | PRKAG1   |
| GeneCard | CAMK1    |
| GeneCard | H3C2     |
| GeneCard | SCNM1    |
| GeneCard | HECTD2   |
| GeneCard | FAM210B  |
| GeneCard | MRPS9    |
| GeneCard | ASGR1    |
| GeneCard | OSBPL3   |
| GeneCard | CYYR1    |
| GeneCard | SLC30A5  |
| GeneCard | MRPL33   |
| GeneCard | RPA2     |
| GeneCard | RCN2     |
| GeneCard | RBBP6    |
| GeneCard | SIRT7    |
| GeneCard | NACA     |
| GeneCard | CSNK2A3  |

|          |          |
|----------|----------|
| GeneCard | NMRK2    |
| GeneCard | IQCK     |
| GeneCard | ATP9A    |
| GeneCard | SANBR    |
| GeneCard | CSRP1    |
| GeneCard | CAPZA1   |
| GeneCard | ADAP1    |
| GeneCard | ZNF207   |
| GeneCard | EIF5B    |
| GeneCard | ZNF221   |
| GeneCard | SUV39H1  |
| GeneCard | KAZALD1  |
| GeneCard | FBXO2    |
| GeneCard | VAMP3    |
| GeneCard | MIR572   |
| GeneCard | MMS19    |
| GeneCard | CSTF2    |
| GeneCard | TXNRD3   |
| GeneCard | IP6K3    |
| GeneCard | NAPG     |
| GeneCard | DHX36    |
| GeneCard | RPS19P6  |
| GeneCard | MGST3    |
| GeneCard | PINX1    |
| GeneCard | FRS3     |
| GeneCard | UBA52P1  |
| GeneCard | CHST8    |
| GeneCard | PTPRM    |
| GeneCard | DPP7     |
| GeneCard | CYTH1    |
| GeneCard | H2AZ1    |
| GeneCard | CCT3     |
| GeneCard | VPS52    |
| GeneCard | GNL2     |
| GeneCard | TRADD    |
| GeneCard | FOXQ1    |
| GeneCard | ZKSCAN8  |
| GeneCard | ME2      |
| GeneCard | KCTD5    |
| GeneCard | AGR3     |
| GeneCard | CASC3    |
| GeneCard | ETF1     |
| GeneCard | GLIPR1   |
| GeneCard | MIR9-3HG |
| GeneCard | MIS12    |
| GeneCard | CSE1L    |
| GeneCard | ST8SIA1  |
| GeneCard | BCL2L13  |
| GeneCard | NFYB     |
| GeneCard | SYT6     |
| GeneCard | EIF4A1   |
| GeneCard | SLC8A2   |
| GeneCard | CUL5     |
| GeneCard | AZIN1    |
| GeneCard | BCL7C    |
| GeneCard | EIF3H    |
| GeneCard | C2orf49  |
| GeneCard | ING3     |

|          |              |
|----------|--------------|
| GeneCard | MARCHF3      |
| GeneCard | EBNA1BP2     |
| GeneCard | HNRNPAB      |
| GeneCard | CDH6         |
| GeneCard | ZNF133       |
| GeneCard | DIMT1        |
| GeneCard | NSUN4        |
| GeneCard | MBD2         |
| GeneCard | C4orf48      |
| GeneCard | TCF15        |
| GeneCard | MAT2B        |
| GeneCard | HGFAC        |
| GeneCard | GLS2         |
| GeneCard | DDX50        |
| GeneCard | CCNB3        |
| GeneCard | TASP1        |
| GeneCard | PLEKHF2      |
| GeneCard | ERG28        |
| GeneCard | GNL3         |
| GeneCard | PRIM2        |
| GeneCard | SWSAP1       |
| GeneCard | R3HDM1       |
| GeneCard | R3HCC1L      |
| GeneCard | DHX58        |
| GeneCard | EYA3         |
| GeneCard | GNA12        |
| GeneCard | ILF2         |
| GeneCard | DAOA-AS1     |
| GeneCard | BEND7        |
| GeneCard | KRTAP11-1    |
| GeneCard | PRS          |
| GeneCard | NAA60        |
| GeneCard | EPN2         |
| GeneCard | BIRC6        |
| GeneCard | PLAAT4       |
| GeneCard | AKR7A2       |
| GeneCard | PPFIBP2      |
| GeneCard | BTAF1        |
| GeneCard | AFAP1L2      |
| GeneCard | LPAR3        |
| GeneCard | ZNF112       |
| GeneCard | ERICH2       |
| GeneCard | OCIAD1       |
| GeneCard | PLPP3        |
| GeneCard | KNDC1        |
| GeneCard | ORC3         |
| GeneCard | TSPO2        |
| GeneCard | HLA-DQB1-AS1 |
| GeneCard | GPKOW        |
| GeneCard | RBM19        |
| GeneCard | TSPAN16      |
| GeneCard | PES1         |
| GeneCard | RNPEP        |
| GeneCard | ANGPTL2      |
| GeneCard | MRPL4        |
| GeneCard | OTOL1        |
| GeneCard | MND1         |
| GeneCard | PTGER1       |

|          |           |
|----------|-----------|
| GeneCard | GTF3C6    |
| GeneCard | LSG1      |
| GeneCard | LILRA3    |
| GeneCard | TMEM26    |
| GeneCard | MAL2      |
| GeneCard | EIF5      |
| GeneCard | C19orf33  |
| GeneCard | PTPMT1    |
| GeneCard | HHIPL1    |
| GeneCard | POLR3D    |
| GeneCard | COTL1     |
| GeneCard | HNF4G     |
| GeneCard | MEAF6     |
| GeneCard | MACROH2A2 |
| GeneCard | SYNGR3    |
| GeneCard | NPFFR1    |
| GeneCard | CETN3     |
| GeneCard | STOML1    |
| GeneCard | SLTM      |
| GeneCard | CCIN      |
| GeneCard | MT1A      |
| GeneCard | PROX1-AS1 |
| GeneCard | GCA       |
| GeneCard | SLC38A2   |
| GeneCard | PUS7L     |
| GeneCard | CHAF1B    |
| GeneCard | BECN2     |
| GeneCard | ANXA4     |
| GeneCard | NXT2      |
| GeneCard | CCDC59    |
| GeneCard | GIGYF1    |
| GeneCard | EXTL2     |
| GeneCard | AQP8      |
| GeneCard | OLFM1     |
| GeneCard | GSTA3     |
| GeneCard | RRP12     |
| GeneCard | ZBTB40    |
| GeneCard | NAF1      |
| GeneCard | UCHL5     |
| GeneCard | AK3       |
| GeneCard | MYNN      |
| GeneCard | RCC2      |
| GeneCard | ZNF283    |
| GeneCard | BRI3      |
| GeneCard | CDC42BPA  |
| GeneCard | NUDT21    |
| GeneCard | CCDC167   |
| GeneCard | CLEC4A    |
| GeneCard | LIMA1     |
| GeneCard | HSF2      |
| GeneCard | H2BC13    |
| GeneCard | CMTR1     |
| GeneCard | SLC39A6   |
| GeneCard | PTPRR     |
| GeneCard | FBXO24    |
| GeneCard | BEST2     |
| GeneCard | TIGAR     |
| GeneCard | SLC1A6    |

|          |           |
|----------|-----------|
| GeneCard | INPP1     |
| GeneCard | ITIH5     |
| GeneCard | MSS51     |
| GeneCard | NUPR1     |
| GeneCard | SOCS5     |
| GeneCard | NOC4L     |
| GeneCard | LIX1      |
| GeneCard | SOCS4     |
| GeneCard | SCD5      |
| GeneCard | MTRNR2L9  |
| GeneCard | RALB      |
| GeneCard | SRP9      |
| GeneCard | CCNL1     |
| GeneCard | TM9SF3    |
| GeneCard | STAC      |
| GeneCard | SPRY4-AS1 |
| GeneCard | TOMM40L   |
| GeneCard | CA5A      |
| GeneCard | TRAK2     |
| GeneCard | ZSWIM8    |
| GeneCard | PRELID1   |
| GeneCard | NIPSNAP1  |
| GeneCard | MIER2     |
| GeneCard | SOD2-OT1  |
| GeneCard | LARP1     |
| GeneCard | DDX52     |
| GeneCard | SPC25     |
| GeneCard | PLBD2     |
| GeneCard | GNGT2     |
| GeneCard | ECI2      |
| GeneCard | USP54     |
| GeneCard | GDNF-AS1  |
| GeneCard | PNLIPRP1  |
| GeneCard | SARNP     |
| GeneCard | CCDC47    |
| GeneCard | IPO7      |
| GeneCard | RHOG      |
| GeneCard | MRI1      |
| GeneCard | HYI       |
| GeneCard | MPV17L    |
| GeneCard | TMOD3     |
| GeneCard | ZNF655    |
| GeneCard | CBR3      |
| GeneCard | CREBZF    |
| GeneCard | TMX3      |
| GeneCard | FBXL7     |
| GeneCard | PCYT1B    |
| GeneCard | CFAP46    |
| GeneCard | GMPS      |
| GeneCard | TP53BP2   |
| GeneCard | PIFO      |
| GeneCard | LINC01184 |
| GeneCard | PGAM5P1   |
| GeneCard | PPIAP59   |
| GeneCard | CCDC61    |
| GeneCard | KRT18P16  |
| GeneCard | PDZD2     |
| GeneCard | RNFT2     |

|          |            |
|----------|------------|
| GeneCard | PDK1       |
| GeneCard | LTV1       |
| GeneCard | POLR1G     |
| GeneCard | HMGCS1     |
| GeneCard | PHPT1      |
| GeneCard | HS1BP3     |
| GeneCard | MTERF3     |
| GeneCard | LLPH       |
| GeneCard | PTPN4      |
| GeneCard | PCDH9      |
| GeneCard | CKMT1A     |
| GeneCard | COPS3      |
| GeneCard | LRRC37A3   |
| GeneCard | MTRNR2L1   |
| GeneCard | LINC01492  |
| GeneCard | SEMA7A     |
| GeneCard | BAZ1A      |
| GeneCard | GGT3P      |
| GeneCard | TAFA4      |
| GeneCard | LRCH4      |
| GeneCard | ZC3HC1     |
| GeneCard | TSC22D4    |
| GeneCard | GADD45GIP1 |
| GeneCard | PFDN4      |
| GeneCard | ZNF230     |
| GeneCard | EFNA1      |
| GeneCard | WDR82      |
| GeneCard | UQCRHL     |
| GeneCard | ULK2       |
| GeneCard | RSRP1      |
| GeneCard | SPC24      |
| GeneCard | STRIP1     |
| GeneCard | ATP5MG     |
| GeneCard | MDGA1      |
| GeneCard | NPTXR      |
| GeneCard | MIR329-1   |
| GeneCard | SLC22A8    |
| GeneCard | CPNE1      |
| GeneCard | EPS15L1    |
| GeneCard | ADAM28     |
| GeneCard | TMED9      |
| GeneCard | NMUR1      |
| GeneCard | VRK3       |
| GeneCard | UTP11      |
| GeneCard | PHF5A      |
| GeneCard | ZNF638     |
| GeneCard | HS3ST2     |
| GeneCard | TMEM47     |
| GeneCard | CSAG1      |
| GeneCard | GRSF1      |
| GeneCard | TOX2       |
| GeneCard | IFNLR1     |
| GeneCard | PDZD8      |
| GeneCard | SGIP1      |
| GeneCard | AMOT       |
| GeneCard | PPP6R1     |
| GeneCard | MIR329-2   |
| GeneCard | COX6B2     |



|          |           |
|----------|-----------|
| GeneCard | SLCO3A1   |
| GeneCard | SELENOW   |
| GeneCard | KRTAP10-7 |
| GeneCard | EIF2A     |
| GeneCard | USP39     |
| GeneCard | WDR91     |
| GeneCard | PSD2      |
| GeneCard | NMNAT3    |
| GeneCard | NUP50     |
| GeneCard | TXNDC11   |
| GeneCard | RSBN1L    |
| GeneCard | PARD3B    |
| GeneCard | CARD10    |
| GeneCard | TNNC2     |
| GeneCard | POU4F2    |
| GeneCard | BCAS2     |
| GeneCard | THAP4     |
| GeneCard | FICD      |
| GeneCard | GNG2      |
| GeneCard | METTL25B  |
| GeneCard | KLF7      |
| GeneCard | CST8      |
| GeneCard | PPA1      |
| GeneCard | RTCB      |
| GeneCard | EPS8L2    |
| GeneCard | SIGLECL1  |
| GeneCard | CST2      |
| GeneCard | HAUS6     |
| GeneCard | SOCS6     |
| GeneCard | FBLN2     |
| GeneCard | TRIM40    |
| GeneCard | PDE1A     |
| GeneCard | IPO9      |
| GeneCard | HMCES     |
| GeneCard | ZNF165    |
| GeneCard | UNC5B     |
| GeneCard | ACOT2     |
| GeneCard | TPRA1     |
| GeneCard | FAM168B   |
| GeneCard | LUC7L3    |
| GeneCard | DCTPP1    |
| GeneCard | CRISPLD2  |
| GeneCard | CHORDC1   |
| GeneCard | GTF3C1    |
| GeneCard | CSNK1G1   |
| GeneCard | LRRC2     |
| GeneCard | CCNA1     |
| GeneCard | CCDC7     |
| GeneCard | STARD3    |
| GeneCard | MTRNR2L3  |
| GeneCard | ODAM      |
| GeneCard | RBM14     |
| GeneCard | HLA-H     |
| GeneCard | LILRB3    |
| GeneCard | WDR18     |
| GeneCard | CTIF      |
| GeneCard | MIR19B2   |
| GeneCard | PSME1     |

|          |              |
|----------|--------------|
| GeneCard | KCNAB1       |
| GeneCard | DUT          |
| GeneCard | AGBL2        |
| GeneCard | DNAJB4       |
| GeneCard | THSD7B       |
| GeneCard | CMIP         |
| GeneCard | TTC29        |
| GeneCard | B4GALT6      |
| GeneCard | H3C3         |
| GeneCard | POGK         |
| GeneCard | SPATA2       |
| GeneCard | AKAP5        |
| GeneCard | CUL4A        |
| GeneCard | LRRC37A      |
| GeneCard | MTSS2        |
| GeneCard | DDX39A       |
| GeneCard | NPM2         |
| GeneCard | LINC01725    |
| GeneCard | NME4         |
| GeneCard | LINC00423    |
| GeneCard | CTAGE12P     |
| GeneCard | ZNF296       |
| GeneCard | DNAJC9       |
| GeneCard | EGFL8        |
| GeneCard | CWF19L2      |
| GeneCard | ZBTB4        |
| GeneCard | CALML6       |
| GeneCard | ZNF77        |
| GeneCard | RCN1         |
| GeneCard | SMDT1        |
| GeneCard | SYF2         |
| GeneCard | CFAP20       |
| GeneCard | ROPN1L       |
| GeneCard | TMX1         |
| GeneCard | USP36        |
| GeneCard | USP13        |
| GeneCard | JAKMIP3      |
| GeneCard | PFDN2        |
| GeneCard | ESPL1        |
| GeneCard | RUFY3        |
| GeneCard | MTRES1       |
| GeneCard | LOC101927870 |
| GeneCard | HOXC4        |
| GeneCard | SNX7         |
| GeneCard | MTRNR2L2     |
| GeneCard | CMPK1        |
| GeneCard | KLHL12       |
| GeneCard | FXVD6        |
| GeneCard | THAP3        |
| GeneCard | EIF3G        |
| GeneCard | EFHD2        |
| GeneCard | OLA1         |
| GeneCard | PCYT2        |
| GeneCard | SGCZ         |
| GeneCard | CAAP1        |
| GeneCard | TTLL6        |
| GeneCard | CTAGE1       |
| GeneCard | FBXO3        |

|          |                 |
|----------|-----------------|
| GeneCard | AKR1B10         |
| GeneCard | CCDC25          |
| GeneCard | CCT2            |
| GeneCard | LRRC20          |
| GeneCard | Inc-ZNF296-6    |
| GeneCard | NONHSAG026010.2 |
| GeneCard | DBF4            |
| GeneCard | H3C11           |
| GeneCard | FRAT2           |
| GeneCard | IFNA8           |
| GeneCard | SIGIRR          |
| GeneCard | UNC5CL          |
| GeneCard | H3C4            |
| GeneCard | COPS7B          |
| GeneCard | STOML2          |
| GeneCard | GRWD1           |
| GeneCard | BOD1            |
| GeneCard | FCMR            |
| GeneCard | CFAP74          |
| GeneCard | ZCCHC24         |
| GeneCard | RASGRP3         |
| GeneCard | ARHGDIB         |
| GeneCard | HOMER3          |
| GeneCard | SPOCK2          |
| GeneCard | RNASE1          |
| GeneCard | SYPL1           |
| GeneCard | SLC16A4         |
| GeneCard | RNF214          |
| GeneCard | NSFL1C          |
| GeneCard | PANX2           |
| GeneCard | DHRX            |
| GeneCard | TAF1C           |
| GeneCard | DCTN6           |
| GeneCard | CCDC14          |
| GeneCard | DEUP1           |
| GeneCard | SCGN            |
| GeneCard | OLIG3           |
| GeneCard | NIT1            |
| GeneCard | THAP7           |
| GeneCard | EHF             |
| GeneCard | STAC2           |
| GeneCard | DGKZ            |
| GeneCard | PRRC2B          |
| GeneCard | RTF1            |
| GeneCard | SRP14           |
| GeneCard | BLOC1S4         |
| GeneCard | VSIR            |
| GeneCard | CDH19           |
| GeneCard | ZADH2           |
| GeneCard | LXN             |
| GeneCard | ZNF404          |
| GeneCard | MTA2            |
| GeneCard | SCAMP3          |
| GeneCard | MRPS17          |
| GeneCard | CNPY3           |
| GeneCard | KIF16B          |
| GeneCard | CARNMT1         |
| GeneCard | LHX6            |

|          |           |
|----------|-----------|
| GeneCard | CST1      |
| GeneCard | CCDC116   |
| GeneCard | GALR3     |
| GeneCard | SNF8      |
| GeneCard | GPS1      |
| GeneCard | PDXP      |
| GeneCard | AK4       |
| GeneCard | RIPOR2    |
| GeneCard | MRPL19    |
| GeneCard | SCGB2A2   |
| GeneCard | SLC29A2   |
| GeneCard | PCDH7     |
| GeneCard | HIRIP3    |
| GeneCard | PRPF38B   |
| GeneCard | RBM5      |
| GeneCard | PARVG     |
| GeneCard | PTK6      |
| GeneCard | CLNK      |
| GeneCard | CHTOP     |
| GeneCard | KLF12     |
| GeneCard | TBC1D9    |
| GeneCard | AKAP8L    |
| GeneCard | EML3      |
| GeneCard | PMCH      |
| GeneCard | HLF       |
| GeneCard | KLHL20    |
| GeneCard | CDKN2A-DT |
| GeneCard | CR1L      |
| GeneCard | ZNF232    |
| GeneCard | RNF138    |
| GeneCard | TAS1R2    |
| GeneCard | COPS4     |
| GeneCard | AKAP8     |
| GeneCard | CYP27C1   |
| GeneCard | RNF20     |
| GeneCard | SUN5      |
| GeneCard | SELENOM   |
| GeneCard | ZNF239    |
| GeneCard | PRPF19    |
| GeneCard | RFC4      |
| GeneCard | NRSN1     |
| GeneCard | C11orf49  |
| GeneCard | PARP4     |
| GeneCard | LURAP1L   |
| GeneCard | ARHGAP19  |
| GeneCard | COPS6     |
| GeneCard | ARAP1     |
| GeneCard | PIM2      |
| GeneCard | TRAPPC3   |
| GeneCard | CACNB1    |
| GeneCard | PAK1IP1   |
| GeneCard | RPF2      |
| GeneCard | ENY2      |
| GeneCard | PAIP1     |
| GeneCard | MIR1285-2 |
| GeneCard | TNFAIP8   |
| GeneCard | LRRC59    |
| GeneCard | FAM163A   |

|          |            |
|----------|------------|
| GeneCard | CDC16      |
| GeneCard | LSM1       |
| GeneCard | B4GALT3    |
| GeneCard | MZT2A      |
| GeneCard | GALNT4     |
| GeneCard | H1-3       |
| GeneCard | ERP29      |
| GeneCard | EIF4EBP2   |
| GeneCard | SNRPF      |
| GeneCard | ARHGAP30   |
| GeneCard | NRDC       |
| GeneCard | GPATCH8    |
| GeneCard | CDR2L      |
| GeneCard | ZNF740     |
| GeneCard | TRIM56     |
| GeneCard | TARDBPP3   |
| GeneCard | STIN2-VNTR |
| GeneCard | ANKMY1     |
| GeneCard | FAHD2A     |
| GeneCard | IFNA5      |
| GeneCard | DAPK2      |
| GeneCard | ARL6IP6    |
| GeneCard | ERGIC2     |
| GeneCard | TRIR       |
| GeneCard | MRPL20     |
| GeneCard | THRAP3     |
| GeneCard | SIGLEC14   |
| GeneCard | ZNF787     |
| GeneCard | RRP8       |
| GeneCard | ZNF3       |
| GeneCard | MKRN2      |
| GeneCard | SLBP       |
| GeneCard | CSTF2T     |
| GeneCard | C1orf112   |
| GeneCard | MANF       |
| GeneCard | DAZAP1     |
| GeneCard | RNF152     |
| GeneCard | MTRNR2L13  |
| GeneCard | C11orf68   |
| GeneCard | SETD3      |
| GeneCard | GATB       |
| GeneCard | BRK1       |
| GeneCard | MRPS35     |
| GeneCard | SPARCL1    |
| GeneCard | GPR17      |
| GeneCard | RPP25      |
| GeneCard | EID1       |
| GeneCard | PTMS       |
| GeneCard | NFIL3      |
| GeneCard | RAPGEF5    |
| GeneCard | NOP58      |
| GeneCard | TCAF2      |
| GeneCard | GDE1       |
| GeneCard | RAPGEF6    |
| GeneCard | SNX17      |
| GeneCard | ARMC3      |
| GeneCard | PRORP      |
| GeneCard | CACUL1     |

|          |           |
|----------|-----------|
| GeneCard | MVB12A    |
| GeneCard | FAM3B     |
| GeneCard | EIF3M     |
| GeneCard | FOSL2     |
| GeneCard | TMCC1     |
| GeneCard | SENP3     |
| GeneCard | MTREX     |
| GeneCard | CD300LF   |
| GeneCard | TGFBRAP1  |
| GeneCard | H2AC21    |
| GeneCard | APIP      |
| GeneCard | LLGL2     |
| GeneCard | NAT8      |
| GeneCard | LIMS1     |
| GeneCard | SNAR-I    |
| GeneCard | KCNC2     |
| GeneCard | NCBP3     |
| GeneCard | RTF2      |
| GeneCard | KRTAP9-2  |
| GeneCard | ZNF512    |
| GeneCard | NPTN      |
| GeneCard | ITPRIP    |
| GeneCard | LMO4      |
| GeneCard | ZNF227    |
| GeneCard | PHF7      |
| GeneCard | BIK       |
| GeneCard | PUM2      |
| GeneCard | RAB11FIP4 |
| GeneCard | SDF2L1    |
| GeneCard | FAM222A   |
| GeneCard | GGACT     |
| GeneCard | PAK6      |
| GeneCard | XPO5      |
| GeneCard | MAPK1IP1L |
| GeneCard | NME1-NME2 |
| GeneCard | DDX31     |
| GeneCard | SPPL3     |
| GeneCard | HERC4     |
| GeneCard | UBE2U     |
| GeneCard | PPIC      |
| GeneCard | SNRK      |
| GeneCard | S100A3    |
| GeneCard | BOC       |
| GeneCard | ANXA8     |
| GeneCard | KLRG1     |
| GeneCard | CAPS      |
| GeneCard | PHF12     |
| GeneCard | RPAIN     |
| GeneCard | LINC01098 |
| GeneCard | LPAL2     |
| GeneCard | CLVS1     |
| GeneCard | UTP14A    |
| GeneCard | MRPS21    |
| GeneCard | ZNF223    |
| GeneCard | RALY      |
| GeneCard | SHC3      |
| GeneCard | MTFP1     |
| GeneCard | MED16     |

|          |          |
|----------|----------|
| GeneCard | FOXN2    |
| GeneCard | SNW1     |
| GeneCard | EIF4A2   |
| GeneCard | BOLA1    |
| GeneCard | RBM6     |
| GeneCard | CLASP2   |
| GeneCard | ECHDC1   |
| GeneCard | TWF2     |
| GeneCard | ZDHHC16  |
| GeneCard | OTUB1    |
| GeneCard | GAL3ST4  |
| GeneCard | CPNE4    |
| GeneCard | SMIM8    |
| GeneCard | RPS6KB2  |
| GeneCard | PRPF4B   |
| GeneCard | RBMXL1   |
| GeneCard | TAF7L    |
| GeneCard | GPR89B   |
| GeneCard | ZNF488   |
| GeneCard | SMG6     |
| GeneCard | CBFA2T3  |
| GeneCard | CPSF7    |
| GeneCard | COMTD1   |
| GeneCard | FHIP2B   |
| GeneCard | UPF3A    |
| GeneCard | TBCC     |
| GeneCard | PHYHIPL  |
| GeneCard | BET1L    |
| GeneCard | INTS3    |
| GeneCard | FOXK2    |
| GeneCard | SEZ6L    |
| GeneCard | SLC24A3  |
| GeneCard | SLC25A48 |
| GeneCard | C16orf95 |
| GeneCard | LZIC     |
| GeneCard | PPP1R2   |
| GeneCard | RBM42    |
| GeneCard | ACAP1    |
| GeneCard | CHST15   |
| GeneCard | TULP4    |
| GeneCard | GTF2A1   |
| GeneCard | BOLL     |
| GeneCard | BCAS1    |
| GeneCard | ARGLU1   |
| GeneCard | RORA-AS1 |
| GeneCard | RTCA     |
| GeneCard | C1D      |
| GeneCard | P2RY6    |
| GeneCard | BOP1     |
| GeneCard | RUFY1    |
| GeneCard | CCL15    |
| GeneCard | RFX1     |
| GeneCard | MTCH1    |
| GeneCard | MPG      |
| GeneCard | UBL4A    |
| GeneCard | PILRB    |
| GeneCard | FBXO46   |
| GeneCard | ADI1     |

|          |            |
|----------|------------|
| GeneCard | DLK2       |
| GeneCard | AVPI1      |
| GeneCard | FCHSD1     |
| GeneCard | BTBD16     |
| GeneCard | FAM98A     |
| GeneCard | TNRC6C     |
| GeneCard | RNF126     |
| GeneCard | SLC29A4    |
| GeneCard | UTP20      |
| GeneCard | SPSB2      |
| GeneCard | ZSCAN9     |
| GeneCard | ZKSCAN1    |
| GeneCard | PGBD5      |
| GeneCard | HSPB7      |
| GeneCard | UBE2C      |
| GeneCard | SUPT20H    |
| GeneCard | RRAGB      |
| GeneCard | ZCRB1      |
| GeneCard | ARHGAP22   |
| GeneCard | COX10-DT   |
| GeneCard | TMEM131    |
| GeneCard | CRYZL1     |
| GeneCard | OMG        |
| GeneCard | SPSB1      |
| GeneCard | MYL12A     |
| GeneCard | KRT33B     |
| GeneCard | RNF41      |
| GeneCard | TICRR      |
| GeneCard | PBLD       |
| GeneCard | FKBPL      |
| GeneCard | METTL16    |
| GeneCard | NME6       |
| GeneCard | SRSF10     |
| GeneCard | CPSF3      |
| GeneCard | SLC10A4    |
| GeneCard | MRPL21     |
| GeneCard | L3MBTL4    |
| GeneCard | BRMS1L     |
| GeneCard | DCAF13     |
| GeneCard | FNBP1L     |
| GeneCard | EXOSC7     |
| GeneCard | ITIH2      |
| GeneCard | MRPL46     |
| GeneCard | CLSTN3     |
| GeneCard | CYLC2      |
| GeneCard | ZC3H4      |
| GeneCard | HP1BP3     |
| GeneCard | GTF3C2     |
| GeneCard | LINCR-0001 |
| GeneCard | CEACAM19   |
| GeneCard | KCTD12     |
| GeneCard | NOL11      |
| GeneCard | KIAA1586   |
| GeneCard | TMEM183A   |
| GeneCard | BRD9       |
| GeneCard | CACNG5     |
| GeneCard | SLC14A2    |
| GeneCard | RAB31      |



|          |           |
|----------|-----------|
| GeneCard | MAST2     |
| GeneCard | SRCIN1    |
| GeneCard | CEP70     |
| GeneCard | MRPL40    |
| GeneCard | NAALAD2   |
| GeneCard | CEP72     |
| GeneCard | ECSIT     |
| GeneCard | VASH2     |
| GeneCard | DIDO1     |
| GeneCard | C1orf35   |
| GeneCard | DNAJB9    |
| GeneCard | RGL1      |
| GeneCard | GAS2      |
| GeneCard | ZC3H12C   |
| GeneCard | IRAK2     |
| GeneCard | USP3      |
| GeneCard | RGN       |
| GeneCard | NUP43     |
| GeneCard | UBE2D4    |
| GeneCard | DNAJC10   |
| GeneCard | CYP20A1   |
| GeneCard | PIP5KL1   |
| GeneCard | CDNF      |
| GeneCard | RAP1GAP   |
| GeneCard | LOC157273 |
| GeneCard | STK26     |
| GeneCard | SURF2     |
| GeneCard | PYCR3     |
| GeneCard | SDIM1     |
| GeneCard | FAM114A2  |
| GeneCard | HSD3BP4   |
| GeneCard | DDX56     |
| GeneCard | ACYP2     |
| GeneCard | ZCCHC17   |
| GeneCard | RUFY2     |
| GeneCard | BMP3      |
| GeneCard | MICAL2    |
| GeneCard | LCA5L     |
| GeneCard | STX12     |
| GeneCard | ADAT2     |
| GeneCard | SRSF8     |
| GeneCard | OOSP2     |
| GeneCard | MRPS5     |
| GeneCard | ZCCHC10   |
| GeneCard | PELI1     |
| GeneCard | OTX1      |
| GeneCard | A2MP1     |
| GeneCard | ZBTB10    |
| GeneCard | ECH1      |
| GeneCard | GNG11     |
| GeneCard | TMX2      |
| GeneCard | EXOSC6    |
| GeneCard | IGSF8     |
| GeneCard | DHX33     |
| GeneCard | LARP4B    |
| GeneCard | MPHOSPH10 |
| GeneCard | ENOPH1    |
| GeneCard | NECAB3    |

|          |             |
|----------|-------------|
| GeneCard | MRM3        |
| GeneCard | BORCS5      |
| GeneCard | CPSF2       |
| GeneCard | CFAP58      |
| GeneCard | SESTD1      |
| GeneCard | CCSER2      |
| GeneCard | SNPH        |
| GeneCard | CYTH2       |
| GeneCard | H2BC11      |
| GeneCard | EFNB3       |
| GeneCard | HIVEP3      |
| GeneCard | ARHGEF5     |
| GeneCard | MBOAT1      |
| GeneCard | DCAF1       |
| GeneCard | THAP11      |
| GeneCard | SNTG1       |
| GeneCard | TVP23B      |
| GeneCard | ZNF629      |
| GeneCard | CBARP       |
| GeneCard | WDR70       |
| GeneCard | MYBPC2      |
| GeneCard | DAZAP2      |
| GeneCard | WDR77       |
| GeneCard | USP14       |
| GeneCard | MRPL55      |
| GeneCard | MRPL17      |
| GeneCard | NUDT4       |
| GeneCard | ARID3B      |
| GeneCard | USP12       |
| GeneCard | CAPSL       |
| GeneCard | CNPY2       |
| GeneCard | OSBP        |
| GeneCard | HNRNPLL     |
| GeneCard | ZNF33B      |
| GeneCard | TMEM176A    |
| GeneCard | MYLIP       |
| GeneCard | RBBP9       |
| GeneCard | ANGPTL7     |
| GeneCard | IPO4        |
| GeneCard | POLR3F      |
| GeneCard | ARF5        |
| GeneCard | REG1B       |
| GeneCard | CYP39A1     |
| GeneCard | MIR8085     |
| GeneCard | CA14        |
| GeneCard | RBM15B      |
| GeneCard | CHMP2A      |
| GeneCard | SLC2A12     |
| GeneCard | PIR         |
| GeneCard | UPP2        |
| GeneCard | MTRNR2L7    |
| GeneCard | APOC4-APOC2 |
| GeneCard | SCML4       |
| GeneCard | RIOK2       |
| GeneCard | PAN2        |
| GeneCard | LRRC7       |
| GeneCard | GEN1        |
| GeneCard | NCKAP5      |

|          |                |
|----------|----------------|
| GeneCard | ZNF581         |
| GeneCard | NFRKB          |
| GeneCard | LOC111589215   |
| GeneCard | SNRPG          |
| GeneCard | ZNF284         |
| GeneCard | RIOX2          |
| GeneCard | ZNF222         |
| GeneCard | MTG1           |
| GeneCard | CLDN8          |
| GeneCard | HCST           |
| GeneCard | KCNK12         |
| GeneCard | PHLDA1         |
| GeneCard | PPAN           |
| GeneCard | DOC2A          |
| GeneCard | SNX25          |
| GeneCard | ZBTB9          |
| GeneCard | CBR4           |
| GeneCard | PNLIPRP2       |
| GeneCard | C3orf62        |
| GeneCard | H3C10          |
| GeneCard | TAS2R60        |
| GeneCard | MIR5582        |
| GeneCard | WDR33          |
| GeneCard | SLC23A2        |
| GeneCard | COLGALT2       |
| GeneCard | CRACR2B        |
| GeneCard | PPIAP55        |
| GeneCard | TERB2          |
| GeneCard | GMNC           |
| GeneCard | NUTF2          |
| GeneCard | EIF1           |
| GeneCard | GORASP2        |
| GeneCard | ITGB3BP        |
| GeneCard | SSBP3          |
| GeneCard | APOBEC3C       |
| GeneCard | CLYBL          |
| GeneCard | ADSS2          |
| GeneCard | POLR1E         |
| GeneCard | MRPL15         |
| GeneCard | ARMCX5-GPRASP2 |
| GeneCard | SNORD63        |
| GeneCard | TMEM259        |
| GeneCard | TWF1           |
| GeneCard | XPO7           |
| GeneCard | RPSAP52        |
| GeneCard | ACTL7B         |
| GeneCard | ARHGAP12       |
| GeneCard | WASH3P         |
| GeneCard | NME5           |
| GeneCard | STK16          |
| GeneCard | FZR1           |
| GeneCard | NUP58          |
| GeneCard | ERH            |
| GeneCard | TRIP6          |
| GeneCard | AHCYL2         |
| GeneCard | HYPK           |
| GeneCard | CCDC134        |
| GeneCard | BOLA2          |

|          |             |
|----------|-------------|
| GeneCard | C9orf78     |
| GeneCard | ZNF30       |
| GeneCard | DMKN        |
| GeneCard | ODF2        |
| GeneCard | RBM26       |
| GeneCard | ARFIP2      |
| GeneCard | FRMPD2      |
| GeneCard | CPNE3       |
| GeneCard | PIH1D1      |
| GeneCard | DDX25       |
| GeneCard | NOMO1       |
| GeneCard | ANKRD36B    |
| GeneCard | TRAM1       |
| GeneCard | VSIG4       |
| GeneCard | TSKU        |
| GeneCard | CDCA3       |
| GeneCard | EHD2        |
| GeneCard | GDF10       |
| GeneCard | MRPS24      |
| GeneCard | RNF103      |
| GeneCard | STC2        |
| GeneCard | ZNF410      |
| GeneCard | SLC4A10     |
| GeneCard | GTF3C3      |
| GeneCard | CMSS1       |
| GeneCard | PAFAH1B3    |
| GeneCard | RAB6C       |
| GeneCard | TEF         |
| GeneCard | IFNW1       |
| GeneCard | APOBEC4     |
| GeneCard | NTN4        |
| GeneCard | KLHL8       |
| GeneCard | TRAPPC5     |
| GeneCard | RASA3       |
| GeneCard | NIFK        |
| GeneCard | LRRFIP2     |
| GeneCard | TIPARP      |
| GeneCard | NFATC3      |
| GeneCard | EPOP        |
| GeneCard | THEM4       |
| GeneCard | CHCHD3      |
| GeneCard | C3orf20     |
| GeneCard | ATP5IF1     |
| GeneCard | DENND4B     |
| GeneCard | SF3A3       |
| GeneCard | MIR520D     |
| GeneCard | CCDC112     |
| GeneCard | TSPOAP1-AS1 |
| GeneCard | STARD13     |
| GeneCard | TSPAN14     |
| GeneCard | PLA2G4E     |
| GeneCard | GTPBP10     |
| GeneCard | TCL1B       |
| GeneCard | CNN2        |
| GeneCard | BEND6       |
| GeneCard | GRAMD1A     |
| GeneCard | DRAP1       |
| GeneCard | AVEN        |

|          |           |
|----------|-----------|
| GeneCard | TCF7L1    |
| GeneCard | CACTIN    |
| GeneCard | REXO4     |
| GeneCard | DDX46     |
| GeneCard | KLHL22    |
| GeneCard | CHI3L2    |
| GeneCard | MRPL47    |
| GeneCard | C7orf25   |
| GeneCard | ZC3H13    |
| GeneCard | MRPL49    |
| GeneCard | WDR5      |
| GeneCard | PRSS45P   |
| GeneCard | ZNF438    |
| GeneCard | ODF3L2    |
| GeneCard | CRACR2A   |
| GeneCard | NUDT5     |
| GeneCard | LMF2      |
| GeneCard | TMSB10    |
| GeneCard | RTP3      |
| GeneCard | ZMYM5     |
| GeneCard | FAM117B   |
| GeneCard | LARP6     |
| GeneCard | TRUB2     |
| GeneCard | CKMT1B    |
| GeneCard | CSTF3     |
| GeneCard | TMPRSS11E |
| GeneCard | SDAD1     |
| GeneCard | MAGED1    |
| GeneCard | MTCP1     |
| GeneCard | PYROXD2   |
| GeneCard | METAP2    |
| GeneCard | ZNF226    |
| GeneCard | ACTBL2    |
| GeneCard | HOXA5     |
| GeneCard | WDR83     |
| GeneCard | PJA2      |
| GeneCard | FERD3L    |
| GeneCard | SPAG9     |
| GeneCard | SAMD8     |
| GeneCard | MOCS3     |
| GeneCard | THNSL1    |
| GeneCard | DTL       |
| GeneCard | PYGO1     |
| GeneCard | TM9SF2    |
| GeneCard | FAM209A   |
| GeneCard | DHX57     |
| GeneCard | C1orf87   |
| GeneCard | ZW10      |
| GeneCard | PIAS3     |
| GeneCard | MRPS18B   |
| GeneCard | OLFM3     |
| GeneCard | RNF40     |
| GeneCard | GPR180    |
| GeneCard | EEF1AKMT2 |
| GeneCard | MRPL13    |
| GeneCard | CDK17     |
| GeneCard | C7orf61   |
| GeneCard | TMEM255A  |

|          |           |
|----------|-----------|
| GeneCard | TSC22D1   |
| GeneCard | ZFYVE16   |
| GeneCard | RAMP3     |
| GeneCard | NIPSNAP2  |
| GeneCard | THOC7     |
| GeneCard | FRMD4B    |
| GeneCard | ZNF599    |
| GeneCard | ANKRD52   |
| GeneCard | ARMC1     |
| GeneCard | DELE1     |
| GeneCard | HAUS8     |
| GeneCard | AKR7A3    |
| GeneCard | NAPA      |
| GeneCard | STEAP1B   |
| GeneCard | STOML3    |
| GeneCard | CPEB3     |
| GeneCard | ST3GAL6   |
| GeneCard | HTATSF1   |
| GeneCard | DDX10     |
| GeneCard | PCNP      |
| GeneCard | UHMK1     |
| GeneCard | PPM1A     |
| GeneCard | VNN2      |
| GeneCard | MIR663A   |
| GeneCard | MXD1      |
| GeneCard | RCL1      |
| GeneCard | SNX15     |
| GeneCard | PUSL1     |
| GeneCard | ACOT13    |
| GeneCard | SNX33     |
| GeneCard | ARPP19    |
| GeneCard | ADGRL4    |
| GeneCard | SNX18     |
| GeneCard | TBC1D2    |
| GeneCard | FOXR1     |
| GeneCard | EAF1      |
| GeneCard | TAAR6     |
| GeneCard | RFLNA     |
| GeneCard | COPRS     |
| GeneCard | KAT14     |
| GeneCard | RTKN      |
| GeneCard | FBXL13    |
| GeneCard | DHX15     |
| GeneCard | CYSTM1    |
| GeneCard | FOXA3     |
| GeneCard | BANF2     |
| GeneCard | BAHD1     |
| GeneCard | LINC01185 |
| GeneCard | GRAP      |
| GeneCard | PPM1G     |
| GeneCard | DIXDC1    |
| GeneCard | ZZEF1     |
| GeneCard | LAMTOR4   |
| GeneCard | RUFY4     |
| GeneCard | MRPL24    |
| GeneCard | FAM184A   |
| GeneCard | STK33     |
| GeneCard | LARP4     |

|          |            |
|----------|------------|
| GeneCard | EIF4ENIF1  |
| GeneCard | GPR156     |
| GeneCard | ZC3H18     |
| GeneCard | MPC2       |
| GeneCard | AASDHPPT   |
| GeneCard | CNIH3      |
| GeneCard | MIIP       |
| GeneCard | NIPSNAP3B  |
| GeneCard | RRP1       |
| GeneCard | GPR18      |
| GeneCard | S100P      |
| GeneCard | TNIP3      |
| GeneCard | SCAMP4     |
| GeneCard | CENPM      |
| GeneCard | SKAP1      |
| GeneCard | NOMO3      |
| GeneCard | MAP3K15    |
| GeneCard | SLAIN2     |
| GeneCard | TMA16      |
| GeneCard | CD99L2     |
| GeneCard | TBCA       |
| GeneCard | ZMAT4      |
| GeneCard | THOC5      |
| GeneCard | SMYD3      |
| GeneCard | PLCD4      |
| GeneCard | IQUB       |
| GeneCard | MRPL38     |
| GeneCard | DOK1       |
| GeneCard | JMJD7      |
| GeneCard | NAPSB      |
| GeneCard | YTHDC2     |
| GeneCard | STEAP3-AS1 |
| GeneCard | CHST2      |
| GeneCard | KCNH4      |
| GeneCard | CD2BP2     |
| GeneCard | SEZ6       |
| GeneCard | MPHOSPH6   |
| GeneCard | UBE2H      |
| GeneCard | OSBPL11    |
| GeneCard | BRD8       |
| GeneCard | NPFFR2     |
| GeneCard | CCDC83     |
| GeneCard | PVRIG      |
| GeneCard | PANK3      |
| GeneCard | SLC13A2    |
| GeneCard | GSTA2      |
| GeneCard | MYO1F      |
| GeneCard | FOCAD      |
| GeneCard | ABCC5      |
| GeneCard | ESYT1      |
| GeneCard | EIF3L      |
| GeneCard | GCC1       |
| GeneCard | SUSD3      |
| GeneCard | MARCHF8    |
| GeneCard | MRPL18     |
| GeneCard | ARL6IP4    |
| GeneCard | PAPSS1     |
| GeneCard | ZBTB14     |

|          |                 |
|----------|-----------------|
| GeneCard | FSIP1           |
| GeneCard | NUMBL           |
| GeneCard | ACOT9           |
| GeneCard | TDRD1           |
| GeneCard | C7orf50         |
| GeneCard | CNSN            |
| GeneCard | PLSCR1          |
| GeneCard | HNRNPUL2        |
| GeneCard | SLC28A2         |
| GeneCard | MTRNR2L10       |
| GeneCard | CDKL1           |
| GeneCard | CCDC60          |
| GeneCard | ANXA13          |
| GeneCard | ZNF483          |
| GeneCard | FECHP1          |
| GeneCard | MEIKIN          |
| GeneCard | KAT7            |
| GeneCard | ENSG00000270679 |
| GeneCard | MK280269-024    |
| GeneCard | MXD4            |
| GeneCard | SEC11C          |
| GeneCard | C5orf67         |
| GeneCard | TRMT61B         |
| GeneCard | DOK2            |
| GeneCard | ZFAND4          |
| GeneCard | RALBP1          |
| GeneCard | NAA38           |
| GeneCard | PTGR1           |
| GeneCard | SUZ12P1         |
| GeneCard | FAM98C          |
| GeneCard | LY86-AS1        |
| GeneCard | TEPSIN          |
| GeneCard | KCTD8           |
| GeneCard | SLC7A2          |
| GeneCard | SLC6A6          |
| GeneCard | ZNF25           |
| GeneCard | NKTR            |
| GeneCard | ENPP6           |
| GeneCard | ARF3            |
| GeneCard | NOB1            |
| GeneCard | C15orf39        |
| GeneCard | OSBPL1A         |
| GeneCard | ACSM6           |
| GeneCard | ATAT1           |
| GeneCard | RBM27           |
| GeneCard | NLK             |
| GeneCard | SFTA1P          |
| GeneCard | FGD5            |
| GeneCard | CYRIA           |
| GeneCard | IGSF21          |
| GeneCard | CMAS            |
| GeneCard | ULBP3           |
| GeneCard | ST8SIA5         |
| GeneCard | ATP6V0D1        |
| GeneCard | TTC23           |
| GeneCard | ARFGAP2         |
| GeneCard | SMC2            |
| GeneCard | ELK3            |



|          |              |
|----------|--------------|
| GeneCard | BTN3A1       |
| GeneCard | DGKI         |
| GeneCard | ARMH3        |
| GeneCard | PDCD5        |
| GeneCard | PRXL2A       |
| GeneCard | KLHL26       |
| GeneCard | TCF25        |
| GeneCard | PEBP4        |
| GeneCard | SLCO2B1      |
| GeneCard | POLA2        |
| GeneCard | SCAANT1      |
| GeneCard | NUDCD3       |
| GeneCard | STAM2        |
| GeneCard | MBLAC1       |
| GeneCard | STRN4        |
| GeneCard | DEFA3        |
| GeneCard | FNTA         |
| GeneCard | ZNF652-AS1   |
| GeneCard | MED24        |
| GeneCard | P2RY4        |
| GeneCard | MED27        |
| GeneCard | TAS2R41      |
| GeneCard | ZBTB43       |
| GeneCard | LOC101928135 |
| GeneCard | EME1         |
| GeneCard | SESN3        |
| GeneCard | DNAJB14      |
| GeneCard | MIR5004      |
| GeneCard | DAPK3        |
| GeneCard | MRPL1        |
| GeneCard | LINC01016    |
| GeneCard | HOOK3        |
| GeneCard | RGL2         |
| GeneCard | COL23A1      |
| GeneCard | DENND2D      |
| GeneCard | ZBTB2        |
| GeneCard | ALPK2        |
| GeneCard | WWP1         |
| GeneCard | TMEM254      |
| GeneCard | MGAT4B       |
| GeneCard | FUBP3        |
| GeneCard | FBXO28       |
| GeneCard | DIRAS2       |
| GeneCard | SFR1         |
| GeneCard | HSF5         |
| GeneCard | PRPF18       |
| GeneCard | SEC61A2      |
| GeneCard | UBAP2L       |
| GeneCard | PITX1-AS1    |
| GeneCard | TTC1         |
| GeneCard | CYRIB        |
| GeneCard | VSTM2A       |
| GeneCard | RGSL1        |
| GeneCard | AK8          |
| GeneCard | LINC00520    |
| GeneCard | MIF4GD       |
| GeneCard | RMND5A       |
| GeneCard | MOB1A        |

|          |           |
|----------|-----------|
| GeneCard | ZCCHC7    |
| GeneCard | H2AP      |
| GeneCard | GOLM2     |
| GeneCard | TAF5      |
| GeneCard | UBA3      |
| GeneCard | ABHD10    |
| GeneCard | UXT       |
| GeneCard | YTHDF3    |
| GeneCard | INTS12    |
| GeneCard | CNOT7     |
| GeneCard | H3C7      |
| GeneCard | H3C8      |
| GeneCard | SAP30     |
| GeneCard | KAZN      |
| GeneCard | PDCL3     |
| GeneCard | PDZRN4    |
| GeneCard | SF1       |
| GeneCard | UNK       |
| GeneCard | SV2B      |
| GeneCard | MED4      |
| GeneCard | C1orf174  |
| GeneCard | MAGEC2    |
| GeneCard | CDC42EP2  |
| GeneCard | MRPL52    |
| GeneCard | GRPEL1    |
| GeneCard | NR1D2     |
| GeneCard | MRPL48    |
| GeneCard | IST1      |
| GeneCard | LINC02141 |
| GeneCard | UBR4      |
| GeneCard | ARRDC4    |
| GeneCard | C1orf74   |
| GeneCard | IGSF10    |
| GeneCard | RBM4B     |
| GeneCard | HEBP1     |
| GeneCard | FAM120A   |
| GeneCard | HSPA12B   |
| GeneCard | SPCS3     |
| GeneCard | ATG3      |
| GeneCard | SMAP1     |
| GeneCard | SCG3      |
| GeneCard | LSM14B    |
| GeneCard | CSNK1G2   |
| GeneCard | DRG2      |
| GeneCard | NLRP8     |
| GeneCard | ZNF485    |
| GeneCard | GSTK1     |
| GeneCard | EIF3E     |
| GeneCard | ANKRA2    |
| GeneCard | GSTM5     |
| GeneCard | PNN       |
| GeneCard | NXF2      |
| GeneCard | NYAP1     |
| GeneCard | MRPL2     |
| GeneCard | KRT78     |
| GeneCard | LCMT1     |
| GeneCard | EIF2D     |
| GeneCard | SIK2      |

|          |                 |
|----------|-----------------|
| GeneCard | LSM12           |
| GeneCard | SYNE3           |
| GeneCard | HSFY1           |
| GeneCard | CST7            |
| GeneCard | ACF             |
| GeneCard | DENND4A         |
| GeneCard | PRTG            |
| GeneCard | SSR1            |
| GeneCard | KLHL36          |
| GeneCard | LINC01550       |
| GeneCard | TBCB            |
| GeneCard | SIT1            |
| GeneCard | ZFP3            |
| GeneCard | CCDC121         |
| GeneCard | MIR153-1        |
| GeneCard | KBTBD8          |
| GeneCard | NMBR            |
| GeneCard | GPN2            |
| GeneCard | MEP1B           |
| GeneCard | ENSG00000285897 |
| GeneCard | ZNF44           |
| GeneCard | PHF19           |
| GeneCard | JAKMIP1         |
| GeneCard | TLE4            |
| GeneCard | GPATCH1         |
| GeneCard | SUDS3           |
| GeneCard | MAP3K21         |
| GeneCard | CNTN3           |
| GeneCard | TUT7            |
| GeneCard | TXNDC17         |
| GeneCard | TNFAIP2         |
| GeneCard | LINC00877       |
| GeneCard | PCDH11Y         |
| GeneCard | TBC1D22B        |
| GeneCard | MIS18A          |
| GeneCard | RPL23AP39       |
| GeneCard | UGT1A12P        |
| GeneCard | LSM8            |
| GeneCard | GRIPAP1         |
| GeneCard | TAX1BP1         |
| GeneCard | GEMIN6          |
| GeneCard | RNF2            |
| GeneCard | DCAF10          |
| GeneCard | SAP18           |
| GeneCard | NXPH1           |
| GeneCard | CENPS           |
| GeneCard | PAK5            |
| GeneCard | RAB26           |
| GeneCard | CATSPERB        |
| GeneCard | KATNA1          |
| GeneCard | POLR3C          |
| GeneCard | C8orf33         |
| GeneCard | RNF25           |
| GeneCard | CBLN3           |
| GeneCard | FBXL2           |
| GeneCard | ATP5MF          |
| GeneCard | CDKN2D          |
| GeneCard | RIPPLY1         |

|          |                 |
|----------|-----------------|
| GeneCard | UBE2L1          |
| GeneCard | NECAP2          |
| GeneCard | STAU2           |
| GeneCard | SNRNP35         |
| GeneCard | ENSG00000259605 |
| GeneCard | lnc-HLA-DQA1-9  |
| GeneCard | lnc-HLA-DRB1-7  |
| GeneCard | HSALNG0049423   |
| GeneCard | HSALNG0049424   |
| GeneCard | ZDHHC7          |
| GeneCard | ARHGEF15        |
| GeneCard | GFOD1           |
| GeneCard | EXOC3           |
| GeneCard | RPA4            |
| GeneCard | ZNF136          |
| GeneCard | SSBP4           |
| GeneCard | ZRANB2          |
| GeneCard | ERMN            |
| GeneCard | TIMM17B         |
| GeneCard | RALGDS          |
| GeneCard | ASB6            |
| GeneCard | CD8B            |
| GeneCard | C11orf1         |
| GeneCard | C1QTNF4         |
| GeneCard | KDM1B           |
| GeneCard | C10orf71        |
| GeneCard | PID1            |
| GeneCard | ANKRD10         |
| GeneCard | TIAM2           |
| GeneCard | GATAD2A         |
| GeneCard | SSH3            |
| GeneCard | OR4D2           |
| GeneCard | TEX51           |
| GeneCard | RNF34           |
| GeneCard | DNAJC4          |
| GeneCard | NUCB1           |
| GeneCard | NRBP2           |
| GeneCard | RAD18           |
| GeneCard | MAGEA6          |
| GeneCard | ZNF285          |
| GeneCard | GSTM4           |
| GeneCard | HIGD1A          |
| GeneCard | SYT3            |
| GeneCard | PPP2R2D         |
| GeneCard | COL21A1         |
| GeneCard | MS4A14          |
| GeneCard | SMG5            |
| GeneCard | MAP1A           |
| GeneCard | PWWP3A          |
| GeneCard | NENF            |
| GeneCard | RETSAT          |
| GeneCard | NKAIN3          |
| GeneCard | MRPS11          |
| GeneCard | NAA80           |
| GeneCard | PNRC2           |
| GeneCard | PLA1A           |
| GeneCard | RNF14           |
| GeneCard | MKNK1           |

|          |            |
|----------|------------|
| GeneCard | AGO4       |
| GeneCard | MAGI3      |
| GeneCard | GDA        |
| GeneCard | MARCHF10   |
| GeneCard | HSPA4L     |
| GeneCard | CIAPIN1    |
| GeneCard | SYT16      |
| GeneCard | ZNF155     |
| GeneCard | AKIP1      |
| GeneCard | WDR61      |
| GeneCard | MIR4736    |
| GeneCard | RUSC1      |
| GeneCard | PLEKHA6    |
| GeneCard | MTF2       |
| GeneCard | SAP25      |
| GeneCard | YRDC       |
| GeneCard | EVI2A      |
| GeneCard | HIC2       |
| GeneCard | LTN1       |
| GeneCard | PALM2AKAP2 |
| GeneCard | ZNF544     |
| GeneCard | NFX1       |
| GeneCard | PMF1       |
| GeneCard | STK3       |
| GeneCard | KBTD4      |
| GeneCard | MTRNR2L11  |
| GeneCard | H1-10      |
| GeneCard | MRPL22     |
| GeneCard | SERINC3    |
| GeneCard | MRPL53     |
| GeneCard | SH3BGRL2   |
| GeneCard | MCMBP      |
| GeneCard | ILRUN      |
| GeneCard | DNAAF9     |
| GeneCard | UCHL3      |
| GeneCard | GPR83      |
| GeneCard | COX11      |
| GeneCard | PRRC1      |
| GeneCard | LINC02863  |
| GeneCard | BTBD1      |
| GeneCard | C11orf94   |
| GeneCard | ACRV1      |
| GeneCard | POLR3E     |
| GeneCard | PARP6      |
| GeneCard | MRPL35     |
| GeneCard | TSPAN33    |
| GeneCard | UBE2E1     |
| GeneCard | VKORC1L1   |
| GeneCard | EMC4       |
| GeneCard | MS4A12     |
| GeneCard | C1orf105   |
| GeneCard | ZFYVE19    |
| GeneCard | TDG        |
| GeneCard | TAF9B      |
| GeneCard | ANKMY2     |
| GeneCard | SLC8A1-AS1 |
| GeneCard | MID1IP1    |
| GeneCard | LAMTOR5    |

|          |            |
|----------|------------|
| GeneCard | TRIML2     |
| GeneCard | MLLT6      |
| GeneCard | PABIR1     |
| GeneCard | IQCH       |
| GeneCard | PMS2P1     |
| GeneCard | CIAO1      |
| GeneCard | LILRA2     |
| GeneCard | AGPAT3     |
| GeneCard | PATE3      |
| GeneCard | ODF2L      |
| GeneCard | EIF4E2     |
| GeneCard | MRPL41     |
| GeneCard | SNURF      |
| GeneCard | TRNAU1AP   |
| GeneCard | DEF6       |
| GeneCard | TAF9       |
| GeneCard | FNTB       |
| GeneCard | IRS3P      |
| GeneCard | MOB1B      |
| GeneCard | ZC3H11A    |
| GeneCard | APOC1P1    |
| GeneCard | GTF2E1     |
| GeneCard | PLA2G4D    |
| GeneCard | SLCO1C1    |
| GeneCard | H2BC14     |
| GeneCard | MAGEH1     |
| GeneCard | UBE2M      |
| GeneCard | LINC01684  |
| GeneCard | KCNU1      |
| GeneCard | DZIP3      |
| GeneCard | PTCHD4     |
| GeneCard | ZSCAN26    |
| GeneCard | ADARB2-AS1 |
| GeneCard | SAE1       |
| GeneCard | GRASLND    |
| GeneCard | POLD3      |
| GeneCard | CCNI       |
| GeneCard | SHTN1      |
| GeneCard | CTNNBIP1   |
| GeneCard | EVI5L      |
| GeneCard | HEXIM2     |
| GeneCard | RAB14      |
| GeneCard | NOTUM      |
| GeneCard | TLE2       |
| GeneCard | FAM241B    |
| GeneCard | ANKRD31    |
| GeneCard | DDX47      |
| GeneCard | SGTA       |
| GeneCard | RHBDD2     |
| GeneCard | NOP16      |
| GeneCard | MIR603     |
| GeneCard | NKPD1      |
| GeneCard | NOMO2      |
| GeneCard | GPATCH4    |
| GeneCard | PRR3       |
| GeneCard | HOXA3      |
| GeneCard | IGSF23     |
| GeneCard | ADCY10P1   |

|          |                 |
|----------|-----------------|
| GeneCard | CEACAM22P       |
| GeneCard | RPL7P51         |
| GeneCard | RNU6-1276P      |
| GeneCard | ENSG00000271046 |
| GeneCard | SIGLEC22P       |
| GeneCard | ENSG00000265206 |
| GeneCard | ENSG00000264112 |
| GeneCard | lnc-OARD1-1     |
| GeneCard | ENSG00000260634 |
| GeneCard | HSALNG0018586   |
| GeneCard | lnc-CYP27C1-1   |
| GeneCard | HSALNG0049988   |
| GeneCard | HSALNG0076170   |
| GeneCard | piR-35674-264   |
| GeneCard | lnc-RNF43-2     |
| GeneCard | RF00017-2265    |
| GeneCard | lnc-TEX51-4     |
| GeneCard | lnc-USP6NL-2    |
| GeneCard | MN297491        |
| GeneCard | HSALNG0010115   |
| GeneCard | HSALNG0010116   |
| GeneCard | HSALNG0049989   |
| GeneCard | LOC105373605    |
| GeneCard | HSALNG0018603   |
| GeneCard | HSALNG0076172   |
| GeneCard | HSALNG0064191   |
| GeneCard | piR-33103-011   |
| GeneCard | piR-56580-022   |
| GeneCard | piR-40605-005   |
| GeneCard | LOC105376412    |
| GeneCard | LOC105376413    |
| GeneCard | MAIP1           |
| GeneCard | CEACAM16-AS1    |
| GeneCard | LINC02498       |
| GeneCard | ENSG00000269148 |
| GeneCard | ENSG00000242798 |
| GeneCard | lnc-BCL3-1      |
| GeneCard | lnc-BCL3-5      |
| GeneCard | S1PR5           |
| GeneCard | TCEANC2         |
| GeneCard | LANCL2          |
| GeneCard | LARP1B          |
| GeneCard | DYNC1LI2        |
| GeneCard | ADGRF4          |
| GeneCard | NECTIN3         |
| GeneCard | CBX4            |
| GeneCard | SLC38A1         |
| GeneCard | RPL34P11        |
| GeneCard | KLF3            |
| GeneCard | PIP4K2B         |
| GeneCard | TRIM69          |
| GeneCard | C2orf16         |
| GeneCard | PARP3           |
| GeneCard | MRPS15          |
| GeneCard | PAFAH1B2        |
| GeneCard | ARL8B           |
| GeneCard | ZNF597          |
| GeneCard | TNIP2           |

|          |                 |
|----------|-----------------|
| GeneCard | TMEM132C        |
| GeneCard | PCMTD1          |
| GeneCard | MS4A13          |
| GeneCard | LETMD1          |
| GeneCard | FKBP8           |
| GeneCard | TMEM14A         |
| GeneCard | INTS6           |
| GeneCard | ACOT4           |
| GeneCard | PARP2           |
| GeneCard | MAGOH           |
| GeneCard | IHO1            |
| GeneCard | CHMP7           |
| GeneCard | HNRNPA0         |
| GeneCard | CPB1            |
| GeneCard | KIAA0513        |
| GeneCard | SUMO3           |
| GeneCard | CNOT2           |
| GeneCard | TRABD           |
| GeneCard | KRT84           |
| GeneCard | MRPL30          |
| GeneCard | KIF3C           |
| GeneCard | LRRC8D          |
| GeneCard | BAALC-AS1       |
| GeneCard | ENSG00000224431 |
| GeneCard | VN2R20P         |
| GeneCard | NR2C2AP         |
| GeneCard | PARD6A          |
| GeneCard | SF3B5           |
| GeneCard | POTEE           |
| GeneCard | MIR545          |
| GeneCard | BASP1-AS1       |
| GeneCard | PN01            |
| GeneCard | ZBTB5           |
| GeneCard | LINC00639       |
| GeneCard | SNHG19          |
| GeneCard | NTMT1           |
| GeneCard | GRAP2           |
| GeneCard | TRA2A           |
| GeneCard | ASB1            |
| GeneCard | EEF1A1P14       |
| GeneCard | KLHL18          |
| GeneCard | VTRNA2-1        |
| GeneCard | SCAMP2          |
| GeneCard | ZNF366          |
| GeneCard | FGFBP1          |
| GeneCard | PARP15          |
| GeneCard | GABPB2          |
| GeneCard | HARBI1          |
| GeneCard | FAM131C         |
| GeneCard | STARD10         |
| GeneCard | VLDLR-AS1       |
| GeneCard | PFDN6           |
| GeneCard | RASL12          |
| GeneCard | PCED1B          |
| GeneCard | AIDA            |
| GeneCard | PFDN5           |
| GeneCard | PCYOX1          |
| GeneCard | PPP1R16B        |



|          |           |
|----------|-----------|
| GeneCard | DDIT4L    |
| GeneCard | LRRIQ3    |
| GeneCard | WASH2P    |
| GeneCard | DDX24     |
| GeneCard | METTL17   |
| GeneCard | MIR302F   |
| GeneCard | OSBPL5    |
| GeneCard | NOL6      |
| GeneCard | ZNRF4     |
| GeneCard | PDAP1     |
| GeneCard | ZSCAN12   |
| GeneCard | RASSF2    |
| GeneCard | NSD3      |
| GeneCard | ZNF414    |
| GeneCard | DTWD1     |
| GeneCard | ACBD6     |
| GeneCard | RCHY1     |
| GeneCard | LMCD1     |
| GeneCard | MAP7D1    |
| GeneCard | SRRM4     |
| GeneCard | MRPS33    |
| GeneCard | OR6V1     |
| GeneCard | C1orf147  |
| GeneCard | COL22A1   |
| GeneCard | NLN       |
| GeneCard | SAMD4B    |
| GeneCard | BATF      |
| GeneCard | MIR384    |
| GeneCard | ZNF473    |
| GeneCard | GOLPH3L   |
| GeneCard | STRBP     |
| GeneCard | MIR3945HG |
| GeneCard | KLHDC10   |
| GeneCard | ZNF500    |
| GeneCard | LDOC1     |
| GeneCard | FBXL22    |
| GeneCard | SLC38A3   |
| GeneCard | DNAJB7    |
| GeneCard | U2SURP    |
| GeneCard | GTF3C5    |
| GeneCard | ZSCAN16   |
| GeneCard | ADGRF2    |
| GeneCard | GSTA5     |
| GeneCard | ZC3H8     |
| GeneCard | KRT222    |
| GeneCard | GPR26     |
| GeneCard | GSPT1     |
| GeneCard | GOSR1     |
| GeneCard | ARL16     |
| GeneCard | BIN3      |
| GeneCard | TMX4      |
| GeneCard | CIART     |
| GeneCard | RHEBL1    |
| GeneCard | OR2K2     |
| GeneCard | TAF7      |
| GeneCard | MYL10     |
| GeneCard | GLB1L     |
| GeneCard | RBM34     |

|          |                   |
|----------|-------------------|
| GeneCard | PAXX              |
| GeneCard | LINC01081         |
| GeneCard | LRP4-AS1          |
| GeneCard | RHOJ              |
| GeneCard | ZMYND8            |
| GeneCard | OCIAD2            |
| GeneCard | NEMP1             |
| GeneCard | LENG1             |
| GeneCard | FUOM              |
| GeneCard | MRPS35P1          |
| GeneCard | DMAC1             |
| GeneCard | C17orf80          |
| GeneCard | NLGN4Y            |
| GeneCard | KLHL4             |
| GeneCard | NUDCD2            |
| GeneCard | FAM214B           |
| GeneCard | SPIRE1            |
| GeneCard | STK40             |
| GeneCard | NINJ2             |
| GeneCard | GTF3C4            |
| GeneCard | HSD11B1L          |
| GeneCard | ZBTB39            |
| GeneCard | TEX33             |
| GeneCard | EIF3K             |
| GeneCard | ARPP21            |
| GeneCard | PCBP3             |
| GeneCard | BAALC-AS2         |
| GeneCard | MRPL51            |
| GeneCard | ELL2              |
| GeneCard | PRB1              |
| GeneCard | ZNF234            |
| GeneCard | ZNF235            |
| GeneCard | MEIOSIN           |
| GeneCard | LOC100505715      |
| GeneCard | STAG3L5P          |
| GeneCard | ENSG00000250948   |
| GeneCard | ZNF45-AS1         |
| GeneCard | ENSG00000267114   |
| GeneCard | ENSG00000262039   |
| GeneCard | lnc-CEACAM20-2    |
| GeneCard | lnc-EPHX2-4       |
| GeneCard | HSALNG0126489     |
| GeneCard | HSALNG0126491     |
| GeneCard | HSALNG0064168-001 |
| GeneCard | RF00017-6441      |
| GeneCard | LINC01848         |
| GeneCard | DLGAP5            |
| GeneCard | MON2              |
| GeneCard | ZC3H15            |
| GeneCard | TMBIM4            |
| GeneCard | ZBTB17            |
| GeneCard | NEK7              |
| GeneCard | ISY1              |
| GeneCard | SCRN1             |
| GeneCard | RGS12             |
| GeneCard | C10orf88          |
| GeneCard | FTLP4             |
| GeneCard | RNF183            |

|          |                |
|----------|----------------|
| GeneCard | ZNF862         |
| GeneCard | LINC00515      |
| GeneCard | MRPS10         |
| GeneCard | FAM110A        |
| GeneCard | KRT82          |
| GeneCard | PLEKHO2        |
| GeneCard | MARCHF7        |
| GeneCard | MRPL50         |
| GeneCard | PCDHGC3        |
| GeneCard | ZBTB6          |
| GeneCard | SH3BGRL3       |
| GeneCard | ZCCHC3         |
| GeneCard | AMER2          |
| GeneCard | CCDC89         |
| GeneCard | TYW3           |
| GeneCard | ZNF430         |
| GeneCard | GNRH2          |
| GeneCard | VAT1           |
| GeneCard | IRGQ           |
| GeneCard | SERINC5        |
| GeneCard | SKIL           |
| GeneCard | GTF2A1L        |
| GeneCard | TMCC2          |
| GeneCard | DNPH1          |
| GeneCard | C17orf49       |
| GeneCard | MAPRE1P2       |
| GeneCard | ZNF792         |
| GeneCard | TXNDC5         |
| GeneCard | RPL17-C18orf32 |
| GeneCard | OTULINL        |
| GeneCard | DDT            |
| GeneCard | TANGO6         |
| GeneCard | DUSP16         |
| GeneCard | TMUB1          |
| GeneCard | JPT1           |
| GeneCard | GGT7           |
| GeneCard | MIR4675        |
| GeneCard | PHYHD1         |
| GeneCard | C19orf53       |
| GeneCard | ZNHIT1         |
| GeneCard | ZNF813         |
| GeneCard | CADM3          |
| GeneCard | RPL9P19        |
| GeneCard | LINC01671      |
| GeneCard | FCAMR          |
| GeneCard | DEXI           |
| GeneCard | MRPL34         |
| GeneCard | TOMM22P6       |
| GeneCard | FAM209B        |
| GeneCard | MYL12B         |
| GeneCard | ARHGAP23       |
| GeneCard | AAMDC          |
| GeneCard | MED9           |
| GeneCard | HMBOX1         |
| GeneCard | DHX29          |
| GeneCard | RAMP2          |
| GeneCard | FYTTD1         |
| GeneCard | NECAB2         |

|          |           |
|----------|-----------|
| GeneCard | ZNF622    |
| GeneCard | BTBD3     |
| GeneCard | ARHGAP17  |
| GeneCard | PLA2G4C   |
| GeneCard | SPDYE3    |
| GeneCard | SPATA1    |
| GeneCard | GCFC2     |
| GeneCard | SHISA2    |
| GeneCard | MOB3C     |
| GeneCard | TRIM38    |
| GeneCard | F8A2      |
| GeneCard | F8A3      |
| GeneCard | EMC7      |
| GeneCard | PDIA5     |
| GeneCard | PLPPR1    |
| GeneCard | SRSF12    |
| GeneCard | LINC-PINT |
| GeneCard | RPL21P119 |
| GeneCard | CASC18    |
| GeneCard | DGCR11    |
| GeneCard | RN7SL2    |
| GeneCard | RN7SL3    |
| GeneCard | PSD3      |
| GeneCard | TCP10L    |
| GeneCard | ING4      |
| GeneCard | RCOR3     |
| GeneCard | APOBEC3H  |
| GeneCard | TOMM22    |
| GeneCard | SRSF11    |
| GeneCard | TRIM42    |
| GeneCard | HAS2-AS1  |
| GeneCard | MYL5      |
| GeneCard | SMIM14    |
| GeneCard | PLCL2     |
| GeneCard | COPS2     |
| GeneCard | SRARP     |
| GeneCard | CLK4      |
| GeneCard | CDH16     |
| GeneCard | ZNF385B   |
| GeneCard | MYBPHL    |
| GeneCard | LINC01122 |
| GeneCard | GALNT7    |
| GeneCard | NHLRC3    |
| GeneCard | RNF217    |
| GeneCard | DCUN1D2   |
| GeneCard | PPP1R11   |
| GeneCard | ITM2C     |
| GeneCard | FRMD8     |
| GeneCard | NAP1L4    |
| GeneCard | ARL4C     |
| GeneCard | ZNF285B   |
| GeneCard | CAVIN4    |
| GeneCard | RAB2B     |
| GeneCard | COPZ1     |
| GeneCard | SKA3      |
| GeneCard | RGS8      |
| GeneCard | MIR519D   |
| GeneCard | ZDHHC23   |

|          |                 |
|----------|-----------------|
| GeneCard | CHCHD6          |
| GeneCard | CZIB            |
| GeneCard | ZNF433          |
| GeneCard | THOC3           |
| GeneCard | RABL6           |
| GeneCard | MRPS35P3        |
| GeneCard | ARHGEF40        |
| GeneCard | DHRS4           |
| GeneCard | HNRNPA1P41      |
| GeneCard | LCE1D           |
| GeneCard | ADAM2           |
| GeneCard | ENKUR           |
| GeneCard | RNH1            |
| GeneCard | STMN3           |
| GeneCard | NASP            |
| GeneCard | ZNF574          |
| GeneCard | GIMAP1          |
| GeneCard | S100A16         |
| GeneCard | DDX6P2          |
| GeneCard | LSM3            |
| GeneCard | PARP10          |
| GeneCard | VSTM2L          |
| GeneCard | DNAJC8          |
| GeneCard | FKBP2           |
| GeneCard | SEPTIN11        |
| GeneCard | OR7E116P        |
| GeneCard | ZBTB48          |
| GeneCard | RFTN1           |
| GeneCard | MFSD10          |
| GeneCard | TMEM41A         |
| GeneCard | C5orf22         |
| GeneCard | MRTFB           |
| GeneCard | SSR3            |
| GeneCard | UBE2Q2          |
| GeneCard | FBXO44          |
| GeneCard | AKAP11          |
| GeneCard | DOCK11          |
| GeneCard | BRSK1           |
| GeneCard | SLC43A3         |
| GeneCard | DAPL1           |
| GeneCard | ESAM            |
| GeneCard | MIR613          |
| GeneCard | SPATA48         |
| GeneCard | DUSP18          |
| GeneCard | ZNF233          |
| GeneCard | PMS2CL          |
| GeneCard | KRT76           |
| GeneCard | FBXL12          |
| GeneCard | C9orf64         |
| GeneCard | MINDY2          |
| GeneCard | PRR7            |
| GeneCard | LOC100288123    |
| GeneCard | TPM1-AS         |
| GeneCard | ENSG00000248714 |
| GeneCard | ENSG00000267317 |
| GeneCard | RNA5SP431       |
| GeneCard | ENSG00000267282 |
| GeneCard | RNU6-560P       |

|          |                        |
|----------|------------------------|
| GeneCard | lnc-APOC1-1            |
| GeneCard | lnc-EED-4              |
| GeneCard | lnc-INTS8-3            |
| GeneCard | lnc-NGEF-1             |
| GeneCard | HSALNG0060016          |
| GeneCard | MK280607-097           |
| GeneCard | MN298114-236           |
| GeneCard | piR-48950-118          |
| GeneCard | ZP3P2                  |
| GeneCard | RF00017-6032           |
| GeneCard | RF00017-6710           |
| GeneCard | HSALNG0126508          |
| GeneCard | NONHSAG026007.2        |
| GeneCard | HSALNG0126509          |
| GeneCard | piR-61028-297          |
| GeneCard | RF00017-2756           |
| GeneCard | PAXBP1                 |
| GeneCard | TEX10                  |
| GeneCard | ATG4C                  |
| GeneCard | UBL3                   |
| GeneCard | PCMTD2                 |
| GeneCard | ELF2                   |
| GeneCard | C1orf94                |
| GeneCard | CCDC171                |
| GeneCard | LCE1B                  |
| GeneCard | TSPAN6                 |
| GeneCard | CTPS2                  |
| GeneCard | DEDD                   |
| GeneCard | TWSG1                  |
| GeneCard | EMC8                   |
| GeneCard | NAT8B                  |
| GeneCard | NUAK2                  |
| GeneCard | RPL15P15               |
| GeneCard | LINC00624              |
| GeneCard | CATSPERD               |
| GeneCard | ERMP1                  |
| GeneCard | FAM3A                  |
| GeneCard | ADGRA1                 |
| GeneCard | FAM204A                |
| GeneCard | ARHGEF7                |
| GeneCard | PNMA8A                 |
| GeneCard | GCNT7                  |
| GeneCard | KRBOX1                 |
| GeneCard | STAG3L5P-PVRIG2P-PILRB |
| GeneCard | LINC01419              |
| GeneCard | PRKRIP1                |
| GeneCard | LINC02098              |
| GeneCard | RIOK1                  |
| GeneCard | NEUROG1                |
| GeneCard | CXXC4                  |
| GeneCard | USP46                  |
| GeneCard | BEX2                   |
| GeneCard | ZNF286B                |
| GeneCard | HECTD1                 |
| GeneCard | H3C13                  |
| GeneCard | MORC4                  |
| GeneCard | DUSP26                 |
| GeneCard | DPPA2                  |

|          |           |
|----------|-----------|
| GeneCard | SLC7A3    |
| GeneCard | CORO2A    |
| GeneCard | PDCD2     |
| GeneCard | CARHSP1   |
| GeneCard | OR52B4    |
| GeneCard | SDR42E1   |
| GeneCard | CAPG      |
| GeneCard | ARMH4     |
| GeneCard | SOCS7     |
| GeneCard | PITHD1    |
| GeneCard | B3GALT1   |
| GeneCard | ACSS3     |
| GeneCard | ENTPD2    |
| GeneCard | ZNF768    |
| GeneCard | KLK9      |
| GeneCard | KCNAB3    |
| GeneCard | PDZK1IP1  |
| GeneCard | FAM83E    |
| GeneCard | RAB20     |
| GeneCard | SPZ1      |
| GeneCard | H3C15     |
| GeneCard | HDHD3     |
| GeneCard | RGS17     |
| GeneCard | UBXN1     |
| GeneCard | PCIF1     |
| GeneCard | PABPC3    |
| GeneCard | BRX1      |
| GeneCard | LHFPL6    |
| GeneCard | RNU7-51P  |
| GeneCard | CEACAM20  |
| GeneCard | PTGR2     |
| GeneCard | RHBDD1    |
| GeneCard | LHX5      |
| GeneCard | NKX2-8    |
| GeneCard | IQCD      |
| GeneCard | RPS6KA6   |
| GeneCard | KLHL32    |
| GeneCard | LRRC47    |
| GeneCard | CCDC137   |
| GeneCard | NPVF      |
| GeneCard | LOC644135 |
| GeneCard | ABR       |
| GeneCard | TP53TG1   |
| GeneCard | GGCT      |
| GeneCard | ARHGAP28  |
| GeneCard | DUSP10    |
| GeneCard | ZNF273    |
| GeneCard | RTL8C     |
| GeneCard | DDI1      |
| GeneCard | AKR1E2    |
| GeneCard | IL27RA    |
| GeneCard | ASB8      |
| GeneCard | STXBP4    |
| GeneCard | NSRP1     |
| GeneCard | GPATCH2L  |
| GeneCard | RPS20P25  |
| GeneCard | ANKRD23   |
| GeneCard | SLC22A17  |

|          |                 |
|----------|-----------------|
| GeneCard | DUSP12          |
| GeneCard | AFG3L1P         |
| GeneCard | UNC5D           |
| GeneCard | KLHL1           |
| GeneCard | C3orf56         |
| GeneCard | NOL12           |
| GeneCard | CASKIN2         |
| GeneCard | DEPP1           |
| GeneCard | PSME4           |
| GeneCard | RAD51AP1        |
| GeneCard | POLR2M          |
| GeneCard | GIMAP8          |
| GeneCard | CIAO3           |
| GeneCard | HCG25           |
| GeneCard | ENSG00000266469 |
| GeneCard | LOC111258526    |
| GeneCard | MZT2B           |
| GeneCard | LYPLA2          |
| GeneCard | RPS27P18        |
| GeneCard | FEZ2            |
| GeneCard | VCY             |
| GeneCard | UBE2O           |
| GeneCard | SAMD7           |
| GeneCard | SYCP2L          |
| GeneCard | CDKL2           |
| GeneCard | RPS26P28        |
| GeneCard | OR7E106P        |
| GeneCard | RPL13AP21       |
| GeneCard | LOC101927598    |
| GeneCard | HSFX1           |
| GeneCard | NGEF            |
| GeneCard | GOLGA6L5P       |
| GeneCard | SIGLEC16        |
| GeneCard | IGHV3-71        |
| GeneCard | PATL1           |
| GeneCard | CDK3            |
| GeneCard | UGGT2           |
| GeneCard | ZNF594          |
| GeneCard | MS4A18          |
| GeneCard | MIR3591         |
| GeneCard | GEMIN7-AS1      |
| GeneCard | TOB1            |
| GeneCard | RGL3            |
| GeneCard | ENSG00000284686 |
| GeneCard | HDHD2           |
| GeneCard | CCNT2-AS1       |
| GeneCard | PRG1            |
| GeneCard | AMOTL2          |
| GeneCard | CAPN6           |
| GeneCard | LINC00163       |
| GeneCard | OR4C3           |
| GeneCard | SLC10A6         |
| GeneCard | CTSO            |
| GeneCard | ATRAID          |
| GeneCard | SMIM29          |
| GeneCard | LSM5            |
| GeneCard | CDKL3           |
| GeneCard | MIR1229         |



|          |              |
|----------|--------------|
| GeneCard | CHID1        |
| GeneCard | LOC105373170 |
| GeneCard | PCBD2        |
| GeneCard | ETFRF1       |
| GeneCard | ALDH8A1      |
| GeneCard | NXF2B        |
| GeneCard | CDYL         |
| GeneCard | SFT2D2       |
| GeneCard | ADAP2        |
| GeneCard | LSM6         |
| GeneCard | TNFAIP8L1    |
| GeneCard | TRIM43       |
| GeneCard | TRMT6        |
| GeneCard | NXPE1        |
| GeneCard | MYRF-AS1     |
| GeneCard | BEGAIN       |
| GeneCard | SLC16A5      |
| GeneCard | CAB39L       |
| GeneCard | ASMTL        |
| GeneCard | SPATA46      |
| GeneCard | SLC38A5      |
| GeneCard | MAST4        |
| GeneCard | ATXN7L3      |
| GeneCard | SPATA8       |
| GeneCard | ZNF48        |
| GeneCard | ANKS4B       |
| GeneCard | TMC5         |
| GeneCard | R3HDML       |
| GeneCard | CNIH1        |
| GeneCard | TMEM198B     |
| GeneCard | CHMP6        |
| GeneCard | CDC42EP4     |
| GeneCard | ZKSCAN5      |
| GeneCard | PRR15        |
| GeneCard | COMMD10      |
| GeneCard | HES4         |
| GeneCard | SUCNR1       |
| GeneCard | FNDC3A       |
| GeneCard | CCDC190      |
| GeneCard | C12orf40     |
| GeneCard | C3orf36      |
| GeneCard | MT4          |
| GeneCard | PPEF1        |
| GeneCard | GPR153       |
| GeneCard | PIAS4        |
| GeneCard | ARMCX5       |
| GeneCard | ZNF12        |
| GeneCard | ZSCAN2       |
| GeneCard | LYPLAL1      |
| GeneCard | RPL21P105    |
| GeneCard | LIMD2        |
| GeneCard | NPIP5        |
| GeneCard | RUSF1        |
| GeneCard | SIVA1        |
| GeneCard | SIDT2        |
| GeneCard | SH3BP1       |
| GeneCard | EVL          |
| GeneCard | ACTL8        |

|          |                 |
|----------|-----------------|
| GeneCard | RPS17P11        |
| GeneCard | ZCCHC12         |
| GeneCard | ARID3A          |
| GeneCard | CHRAC1          |
| GeneCard | ANKRD12         |
| GeneCard | SPATA17         |
| GeneCard | OR2A1           |
| GeneCard | OR2AE1          |
| GeneCard | PLGLA           |
| GeneCard | TREML3P         |
| GeneCard | LINC01479       |
| GeneCard | TREML5P         |
| GeneCard | LOC154761       |
| GeneCard | ARHGEF35-AS1    |
| GeneCard | RPL39P          |
| GeneCard | ZNF230-DT       |
| GeneCard | ZNF232-AS1      |
| GeneCard | APP-DT          |
| GeneCard | EIF5AP3         |
| GeneCard | LINC02705       |
| GeneCard | PVRIG2P         |
| GeneCard | OR2A13P         |
| GeneCard | ENSG00000224541 |
| GeneCard | ENSG00000238273 |
| GeneCard | ENSG00000255197 |
| GeneCard | ENSG00000246790 |
| GeneCard | ENSG00000245025 |
| GeneCard | ENSG00000235522 |
| GeneCard | C17orf114       |
| GeneCard | RN7SL535P       |
| GeneCard | PPP1R35-AS1     |
| GeneCard | LOC100289518    |
| GeneCard | ENSG00000263164 |
| GeneCard | ENSG00000263220 |
| GeneCard | ENSG00000255355 |
| GeneCard | ENSG00000235085 |
| GeneCard | CD2AP-DT        |
| GeneCard | LINC02695       |
| GeneCard | SUMO2P6         |
| GeneCard | TAS2R62P        |
| GeneCard | RPS16P9         |
| GeneCard | RNU6-611P       |
| GeneCard | ENSG00000186019 |
| GeneCard | ENSG00000258985 |
| GeneCard | ENSG00000261526 |
| GeneCard | ENSG00000263272 |
| GeneCard | ENSG00000267044 |
| GeneCard | ENSG00000267257 |
| GeneCard | ENSG00000267283 |
| GeneCard | ENSG00000241357 |
| GeneCard | ENSG00000200090 |
| GeneCard | RN7SKP102       |
| GeneCard | ENSG00000285664 |
| GeneCard | ENSG00000274354 |
| GeneCard | ENSG00000288045 |
| GeneCard | ENSG00000218809 |
| GeneCard | ENSG00000252200 |
| GeneCard | lnc-ALDH1A2-9   |

|          |                 |
|----------|-----------------|
| GeneCard | lnc-FERMT2-2    |
| GeneCard | NONHSAG008235.2 |
| GeneCard | ENSG00000262227 |
| GeneCard | ENSG00000279753 |
| GeneCard | HSALNG0017603   |
| GeneCard | ENSG00000279095 |
| GeneCard | HSALNG0007914   |
| GeneCard | ENSG00000228335 |
| GeneCard | YWHAZP9         |
| GeneCard | HSALNG0126529   |
| GeneCard | lnc-CCDC83-3    |
| GeneCard | lnc-CYYR1-5     |
| GeneCard | HSALNG0132408   |
| GeneCard | lnc-CEACAM16-1  |
| GeneCard | lnc-CEACAM16-2  |
| GeneCard | lnc-CEACAM19-2  |
| GeneCard | lnc-CLU-2       |
| GeneCard | lnc-MARK4-1     |
| GeneCard | HSALNG0126505   |
| GeneCard | HSALNG0131068   |
| GeneCard | lnc-CYYR1-6     |
| GeneCard | lnc-GPR141-3    |
| GeneCard | lnc-BLID-6      |
| GeneCard | HSALNG0103265   |
| GeneCard | HSALNG0059997   |
| GeneCard | HSALNG0059998   |
| GeneCard | HSALNG0122970   |
| GeneCard | HSALNG0059996   |
| GeneCard | HSALNG0101310   |
| GeneCard | lnc-SYTL2-5     |
| GeneCard | MN298458        |
| GeneCard | piR-39098-253   |
| GeneCard | lnc-TMEM259-5   |
| GeneCard | lnc-TMEM259-4   |
| GeneCard | NONHSAG009267.2 |
| GeneCard | RF00017-3346    |
| GeneCard | piR-42851       |
| GeneCard | lnc-PSMC3-1     |
| GeneCard | ENSG00000280087 |
| GeneCard | HSALNG0017601   |
| GeneCard | HSALNG0023072   |
| GeneCard | HSALNG0007913   |
| GeneCard | HSALNG0126487   |
| GeneCard | lnc-BLOC1S3-1   |
| GeneCard | HSALNG0126526   |
| GeneCard | lnc-EPHX2-1     |
| GeneCard | HSALNG0103266   |
| GeneCard | HSALNG0049427   |
| GeneCard | HSALNG0064193   |
| GeneCard | HSALNG0086209   |
| GeneCard | HSALNG0106226   |
| GeneCard | HSALNG0114109   |
| GeneCard | HSALNG0122967   |
| GeneCard | HSALNG0064192   |
| GeneCard | NONHSAG008424.2 |
| GeneCard | NONHSAG008427.2 |
| GeneCard | NONHSAG024334.2 |
| GeneCard | piR-34451       |

|          |                 |
|----------|-----------------|
| GeneCard | piR-43105-088   |
| GeneCard | piR-48209-263   |
| GeneCard | piR-48759-046   |
| GeneCard | piR-57337-010   |
| GeneCard | LOC105370500    |
| GeneCard | lnc-RAB8B-2     |
| GeneCard | lnc-RAPSN-1     |
| GeneCard | RF00026-195     |
| GeneCard | RF00026-501     |
| GeneCard | SNODB480        |
| GeneCard | LOC107985306    |
| GeneCard | FJ601684-431    |
| GeneCard | LOC100420902    |
| GeneCard | HSALNG0126532   |
| GeneCard | HSALNG0126533   |
| GeneCard | lnc-BLOC1S3-2   |
| GeneCard | HSALNG0126506   |
| GeneCard | HSALNG0126511   |
| GeneCard | HSALNG0126512   |
| GeneCard | HSALNG0126525   |
| GeneCard | HSALNG0126522   |
| GeneCard | HSALNG0126473   |
| GeneCard | HSALNG0126500   |
| GeneCard | HSALNG0126501   |
| GeneCard | HSALNG0126503   |
| GeneCard | HSALNG0126504   |
| GeneCard | HSALNG0126523   |
| GeneCard | HSALNG0126524   |
| GeneCard | HSALNG0126513   |
| GeneCard | HSALNG0126538   |
| GeneCard | HSALNG0126530   |
| GeneCard | HSALNG0132406   |
| GeneCard | lnc-CLU-4       |
| GeneCard | HSALNG0061964   |
| GeneCard | HSALNG0106227   |
| GeneCard | HSALNG0062049   |
| GeneCard | HSALNG0084442   |
| GeneCard | HSALNG0106477   |
| GeneCard | HSALNG0122971   |
| GeneCard | HSALNG0060001   |
| GeneCard | HSALNG0064187   |
| GeneCard | HSALNG0084443   |
| GeneCard | HSALNG0084051   |
| GeneCard | HSALNG0122969   |
| GeneCard | lnc-TNFRSF21-1  |
| GeneCard | lnc-TREML4-1    |
| GeneCard | lnc-TREM1-3     |
| GeneCard | MK280046        |
| GeneCard | MN298426        |
| GeneCard | piR-32285-084   |
| GeneCard | piR-35002-105   |
| GeneCard | lnc-SYTL2-4     |
| GeneCard | lnc-TRAPPC6A-2  |
| GeneCard | piR-30449-174   |
| GeneCard | lnc-SLC52A1-3   |
| GeneCard | NONHSAG026004.2 |
| GeneCard | piR-30091-098   |
| GeneCard | piR-31199-347   |

|          |                 |
|----------|-----------------|
| GeneCard | piR-31534-344   |
| GeneCard | piR-39099-259   |
| GeneCard | piR-48301-221   |
| GeneCard | piR-51999-003   |
| GeneCard | piR-56022-272   |
| GeneCard | piR-56022-298   |
| GeneCard | piR-61514-039   |
| GeneCard | piR-48759-295   |
| GeneCard | piR-56133-041   |
| GeneCard | piR-56133-114   |
| GeneCard | piR-57460-090   |
| GeneCard | MN297596        |
| GeneCard | piR-43105-087   |
| GeneCard | piR-45605-003   |
| GeneCard | piR-52438-098   |
| GeneCard | piR-53819-005   |
| GeneCard | piR-55657-145   |
| GeneCard | piR-43408-141   |
| GeneCard | piR-55654-285   |
| GeneCard | piR-59907-014   |
| GeneCard | RF00017-2757    |
| GeneCard | LOC105375427    |
| GeneCard | LOC105372420    |
| GeneCard | HSALNG0084440   |
| GeneCard | HSALNG0064174   |
| GeneCard | piR-48301-198   |
| GeneCard | piR-39488-149   |
| GeneCard | LOC102724025    |
| GeneCard | ENSG00000255331 |
| GeneCard | TSC22D2         |
| GeneCard | CAMKK1          |
| GeneCard | ARHGEF10L       |
| GeneCard | ASCL3           |
| GeneCard | SETP2           |
| GeneCard | RPL17P46        |
| GeneCard | OR6R2P          |
| GeneCard | IFNA16          |
| GeneCard | RNF113B         |
| GeneCard | TMEM267         |
| GeneCard | ZHX1            |
| GeneCard | MAF1            |
| GeneCard | INO80E          |
| GeneCard | TRIM23          |
| GeneCard | ELOA2           |
| GeneCard | MAGEA2          |
| GeneCard | SGK2            |
| GeneCard | ZMAT3           |
| GeneCard | LINC00476       |
| GeneCard | MRPL54          |
| GeneCard | HDDC2           |
| GeneCard | ARRDC1          |
| GeneCard | HS3ST4          |
| GeneCard | UTP6            |
| GeneCard | UQCC1           |
| GeneCard | RPUSD2          |
| GeneCard | MIR922          |
| GeneCard | DHRS7B          |
| GeneCard | ZIK1            |

|          |                 |
|----------|-----------------|
| GeneCard | PBX4            |
| GeneCard | LNX2            |
| GeneCard | MIR365B         |
| GeneCard | RPL31P13        |
| GeneCard | MAP3K12         |
| GeneCard | GPR12           |
| GeneCard | FMNL1           |
| GeneCard | TMEM61          |
| GeneCard | HMG20B          |
| GeneCard | CCDC124         |
| GeneCard | PCDHA7          |
| GeneCard | ART4            |
| GeneCard | NOL7            |
| GeneCard | ECHDC2          |
| GeneCard | MIR302A         |
| GeneCard | KRCC1           |
| GeneCard | HEBP2           |
| GeneCard | C9orf92         |
| GeneCard | LINC02151       |
| GeneCard | LINC00319       |
| GeneCard | METTL13         |
| GeneCard | MIR4425         |
| GeneCard | LINC01982       |
| GeneCard | RUNX3-AS1       |
| GeneCard | RNU6-343P       |
| GeneCard | RN7SL809P       |
| GeneCard | ENSG00000184441 |
| GeneCard | ENSG00000257740 |
| GeneCard | ENSG00000258317 |
| GeneCard | lnc-TWIST1-1    |
| GeneCard | lnc-SFRP4-1     |
| GeneCard | USP21           |
| GeneCard | CDK2AP1         |
| GeneCard | C5orf15         |
| GeneCard | CITED1          |
| GeneCard | RHNO1           |
| GeneCard | TCP11           |
| GeneCard | TM2D2           |
| GeneCard | NACC2           |
| GeneCard | TMEM205         |
| GeneCard | C4orf33         |
| GeneCard | MYEOV           |
| GeneCard | CIAO2B          |
| GeneCard | RASSF3          |
| GeneCard | ORMDL2          |
| GeneCard | KLHL38          |
| GeneCard | ZNF839          |
| GeneCard | ZFYVE28         |
| GeneCard | ACBD4           |
| GeneCard | TENT5B          |
| GeneCard | ALDH1L2         |
| GeneCard | CCDC85A         |
| GeneCard | MIR1908         |
| GeneCard | TCP10L3         |
| GeneCard | TRIM46          |
| GeneCard | USP28           |
| GeneCard | MMGT1           |
| GeneCard | SH3GLB2         |

|          |           |
|----------|-----------|
| GeneCard | CEND1     |
| GeneCard | DIRAS1    |
| GeneCard | HLA-V     |
| GeneCard | TMEM109   |
| GeneCard | ATF7IP2   |
| GeneCard | LINC02245 |
| GeneCard | RPL36AP40 |
| GeneCard | PAIP2     |
| GeneCard | RBPJL     |
| GeneCard | NAP1L2    |
| GeneCard | ORMDL1    |
| GeneCard | OVCH1-AS1 |
| GeneCard | TSPAN5    |
| GeneCard | SLC4A9    |
| GeneCard | PPP1R32   |
| GeneCard | GLYATL3   |
| GeneCard | RPS23P3   |
| GeneCard | SERTAD4   |
| GeneCard | NUSAP1    |
| GeneCard | C16orf54  |
| GeneCard | NUDT14    |
| GeneCard | LINC01599 |
| GeneCard | FAM86B3P  |
| GeneCard | WDR44     |
| GeneCard | FILIP1    |
| GeneCard | CCDC32    |
| GeneCard | C11orf54  |
| GeneCard | C15orf48  |
| GeneCard | WWC3      |
| GeneCard | LINC01093 |
| GeneCard | LZTS3     |
| GeneCard | CATSPER3  |
| GeneCard | GLI4      |
| GeneCard | TRIM47    |
| GeneCard | AIFM3     |
| GeneCard | PCDHGA12  |
| GeneCard | GPBP1L1   |
| GeneCard | FLRT2     |
| GeneCard | TTC27     |
| GeneCard | KLHL6     |
| GeneCard | CCDC159   |
| GeneCard | PLK3      |
| GeneCard | PTTG2     |
| GeneCard | MRGPRX3   |
| GeneCard | ZFX       |
| GeneCard | APEX2     |
| GeneCard | CHST1     |
| GeneCard | ASCL4     |
| GeneCard | CNIH2     |
| GeneCard | RIMS3     |
| GeneCard | TMEM123   |
| GeneCard | ZFC3H1    |
| GeneCard | SPATS2    |
| GeneCard | CD300LG   |
| GeneCard | ARAP2     |
| GeneCard | ZNF844    |
| GeneCard | SNORA21   |
| GeneCard | HHLA1     |

|          |              |
|----------|--------------|
| GeneCard | RPRD2        |
| GeneCard | ZFP64        |
| GeneCard | RAMP1        |
| GeneCard | POLDIP2      |
| GeneCard | CDK15        |
| GeneCard | KIAA0408     |
| GeneCard | IGHV3-72     |
| GeneCard | ZFAND5       |
| GeneCard | SSX2B        |
| GeneCard | TBC1D21      |
| GeneCard | MSANTD3      |
| GeneCard | SPRNP1       |
| GeneCard | HOXC11       |
| GeneCard | GSTT2B       |
| GeneCard | SCEL         |
| GeneCard | ADIRF        |
| GeneCard | PRRG2        |
| GeneCard | SH3RF1       |
| GeneCard | TBC1D16      |
| GeneCard | C8orf58      |
| GeneCard | TMCO5B       |
| GeneCard | UGT1A13P     |
| GeneCard | MAGEA11      |
| GeneCard | DSN1         |
| GeneCard | PHAF1        |
| GeneCard | RIMS4        |
| GeneCard | LOC107882133 |
| GeneCard | RPS15AP30    |
| GeneCard | WSCD1        |
| GeneCard | MIR650       |
| GeneCard | CDK16        |
| GeneCard | IQGAP3       |
| GeneCard | BRME1        |
| GeneCard | OTUB2        |
| GeneCard | RNF166       |
| GeneCard | TES          |
| GeneCard | RAPGEFL1     |
| GeneCard | TMA7         |
| GeneCard | GINS3        |
| GeneCard | TASOR2       |
| GeneCard | IKBIP        |
| GeneCard | PIMREG       |
| GeneCard | ELP5         |
| GeneCard | GRINA        |
| GeneCard | MIR539       |
| GeneCard | ST3GAL3-AS1  |
| GeneCard | GFPT2        |
| GeneCard | PDE1B        |
| GeneCard | SNORD111B    |
| GeneCard | HIGD2A       |
| GeneCard | ZNF22-AS1    |
| GeneCard | KIAA0930     |
| GeneCard | MALSU1       |
| GeneCard | ZBTB7C       |
| GeneCard | IFI6         |
| GeneCard | NETO1        |
| GeneCard | CCNB1IP1     |
| GeneCard | FANK1        |



|          |                   |
|----------|-------------------|
| GeneCard | TBC1D9B           |
| GeneCard | FSBP              |
| GeneCard | SERF2             |
| GeneCard | TMEM53            |
| GeneCard | RPS17P2           |
| GeneCard | H2AW              |
| GeneCard | LRRC1             |
| GeneCard | DNAJB12           |
| GeneCard | MAP3K9            |
| GeneCard | UBE2L2            |
| GeneCard | ANKEF1            |
| GeneCard | ARMC7             |
| GeneCard | TLE5              |
| GeneCard | MAPK8IP2          |
| GeneCard | CCDC90B           |
| GeneCard | ARL17B            |
| GeneCard | CFAP20DC          |
| GeneCard | LINC01588         |
| GeneCard | AQP4-AS1          |
| GeneCard | LINC01099         |
| GeneCard | LOC171391         |
| GeneCard | LINC02064         |
| GeneCard | ENSG00000260971   |
| GeneCard | LINC02815         |
| GeneCard | RNU6-189P         |
| GeneCard | RNU6-565P         |
| GeneCard | ENSG00000282885   |
| GeneCard | ENSG00000258199   |
| GeneCard | RNA5SP173         |
| GeneCard | RNU6-976P         |
| GeneCard | Inc-C1orf74-1     |
| GeneCard | HSALNG0101144     |
| GeneCard | HSALNG0092134     |
| GeneCard | MK280269-012      |
| GeneCard | RF00017-4423      |
| GeneCard | LOC107984526      |
| GeneCard | HSALNG0101147-002 |
| GeneCard | RF00017-5681      |
| GeneCard | RF00017-5682      |
| GeneCard | RNU7-66P          |
| GeneCard | HPCAL4            |
| GeneCard | DPP3              |
| GeneCard | CLIC3             |
| GeneCard | LMCD1-AS1         |
| GeneCard | RBMXP1            |
| GeneCard | TIMM44            |
| GeneCard | LOC109113862      |
| GeneCard | PELI3             |
| GeneCard | KLHL17            |
| GeneCard | PRDM16-DT         |
| GeneCard | TRIM41            |
| GeneCard | DLGAP1-AS2        |
| GeneCard | LAMTOR1           |
| GeneCard | MAGEA8            |
| GeneCard | LIMCH1            |
| GeneCard | TSPAN3            |
| GeneCard | ORAI2             |
| GeneCard | COP1              |

|          |             |
|----------|-------------|
| GeneCard | LONRF2      |
| GeneCard | C14orf93    |
| GeneCard | ETNPPL      |
| GeneCard | RPL3P11     |
| GeneCard | FAM180B     |
| GeneCard | TCP11L1     |
| GeneCard | ZNF460      |
| GeneCard | FAM151A     |
| GeneCard | LMNTD1      |
| GeneCard | BAGE        |
| GeneCard | C3orf14     |
| GeneCard | GOLGA6L4    |
| GeneCard | LINC00290   |
| GeneCard | LINC01508   |
| GeneCard | LNC-LBCS    |
| GeneCard | STK24-AS1   |
| GeneCard | MOCS2-DT    |
| GeneCard | B3GALT1-AS1 |
| GeneCard | CTAGE14P    |
| GeneCard | TADA3       |
| GeneCard | MRPL27      |
| GeneCard | TMEM185A    |
| GeneCard | GPR137B     |
| GeneCard | STX19       |
| GeneCard | LOC646506   |
| GeneCard | STK17B      |
| GeneCard | EEPD1       |
| GeneCard | DPYSL3      |
| GeneCard | HOXC6       |
| GeneCard | RASL11A     |
| GeneCard | PPP1R2B     |
| GeneCard | DRAM1       |
| GeneCard | SPSB3       |
| GeneCard | PARD6B      |
| GeneCard | C9orf47     |
| GeneCard | SNORD35B    |
| GeneCard | LINC00687   |
| GeneCard | TAOK3       |
| GeneCard | SOX21-AS1   |
| GeneCard | FASTK       |
| GeneCard | RFX4        |
| GeneCard | CCL16       |
| GeneCard | RPSAP47     |
| GeneCard | GAPDHP15    |
| GeneCard | PGBD3P4     |
| GeneCard | METTL25     |
| GeneCard | ZNF496      |
| GeneCard | PPP1R9A     |
| GeneCard | FMC1-LUC7L2 |
| GeneCard | GNG4        |
| GeneCard | TP53TG5     |
| GeneCard | FAM83A      |
| GeneCard | MIR4432     |
| GeneCard | HSFX2       |
| GeneCard | NIM1K       |
| GeneCard | H2BC1       |
| GeneCard | PPM1E       |
| GeneCard | MIR4487     |

|          |                 |
|----------|-----------------|
| GeneCard | VBP1            |
| GeneCard | DGLUCY          |
| GeneCard | RHPN1           |
| GeneCard | GSE1            |
| GeneCard | LINC00343       |
| GeneCard | IGKV4-1         |
| GeneCard | SLC35B1         |
| GeneCard | TAS2R5          |
| GeneCard | C9orf152        |
| GeneCard | IGHV2-70        |
| GeneCard | KRT18P30        |
| GeneCard | PBDC1           |
| GeneCard | ZNF343          |
| GeneCard | RPL15P2         |
| GeneCard | SPX             |
| GeneCard | SYNPR           |
| GeneCard | C6orf118        |
| GeneCard | ARL4D           |
| GeneCard | POTEJ           |
| GeneCard | HAUS5           |
| GeneCard | SGPP2           |
| GeneCard | PITPNB          |
| GeneCard | CARNS1          |
| GeneCard | ZNF684          |
| GeneCard | ALOX12-AS1      |
| GeneCard | LINC02210-CRHR1 |
| GeneCard | ZBTB25          |
| GeneCard | FAM181A-AS1     |
| GeneCard | PAQR7           |
| GeneCard | SLC16A7         |
| GeneCard | CAMKV           |
| GeneCard | NARF            |
| GeneCard | C6orf163        |
| GeneCard | LINC01060       |
| GeneCard | SEC1P           |
| GeneCard | LINC00507       |
| GeneCard | LINC00654       |
| GeneCard | LOC100379224    |
| GeneCard | TCEAL2          |
| GeneCard | TMEM186         |
| GeneCard | AKNAD1          |
| GeneCard | PPP1R21         |
| GeneCard | SCRG1           |
| GeneCard | PA2G4P2         |
| GeneCard | HCFC1R1         |
| GeneCard | SPOCK3          |
| GeneCard | STAG3L4         |
| GeneCard | ZNF791          |
| GeneCard | CENPI           |
| GeneCard | FAM90A1         |
| GeneCard | RNF10           |
| GeneCard | MIR147A         |
| GeneCard | INO80C          |
| GeneCard | FOXS1           |
| GeneCard | CLIP4           |
| GeneCard | C22orf39        |
| GeneCard | MED21           |
| GeneCard | NPIP4           |

|          |                 |
|----------|-----------------|
| GeneCard | PPP5D1P         |
| GeneCard | LINC00933       |
| GeneCard | SLC2A9-AS1      |
| GeneCard | ENSG00000257411 |
| GeneCard | ENSG00000255508 |
| GeneCard | SLC41A3         |
| GeneCard | CALCOCO1        |
| GeneCard | TCEAL4          |
| GeneCard | TCP11L2         |
| GeneCard | ERVFRD-1        |
| GeneCard | CLDN12          |
| GeneCard | MCRS1           |
| GeneCard | RITA1           |
| GeneCard | HSPD1P22        |
| GeneCard | RPL3P8          |
| GeneCard | DCANP1          |
| GeneCard | TCEANC          |
| GeneCard | PTBP3           |
| GeneCard | RGS3            |
| GeneCard | MIR4274         |
| GeneCard | RPL39P5         |
| GeneCard | COMMD2          |
| GeneCard | PASD1           |
| GeneCard | RNF165          |
| GeneCard | MSGN1           |
| GeneCard | MIR3126         |
| GeneCard | NMUR2           |
| GeneCard | TMEM174         |
| GeneCard | TEX12           |
| GeneCard | ZNF385C         |
| GeneCard | FASTKD5         |
| GeneCard | CENPQ           |
| GeneCard | C18orf32        |
| GeneCard | LOC285638       |
| GeneCard | ABTB1           |
| GeneCard | TOX4            |
| GeneCard | HAUS2           |
| GeneCard | STRIP2          |
| GeneCard | CLEC2B          |
| GeneCard | BPESC1          |
| GeneCard | C18orf54        |
| GeneCard | SAXO1           |
| GeneCard | MLF2            |
| GeneCard | ENC1            |
| GeneCard | ZNF774          |
| GeneCard | MAGEB2          |
| GeneCard | USP38           |
| GeneCard | OVCH1           |
| GeneCard | LRRD1           |
| GeneCard | C7orf33         |
| GeneCard | LINC01170       |
| GeneCard | RPL7AP36        |
| GeneCard | SH3RF2          |
| GeneCard | EPB41L5         |
| GeneCard | MIR6845         |
| GeneCard | CP20            |
| GeneCard | ZNF20           |
| GeneCard | EIF1AY          |

|          |              |
|----------|--------------|
| GeneCard | PRR14        |
| GeneCard | DDX43        |
| GeneCard | PDCD7        |
| GeneCard | CDK2AP2      |
| GeneCard | ARMCX3       |
| GeneCard | TMEM33       |
| GeneCard | MRFAP1       |
| GeneCard | ZNF747       |
| GeneCard | KCNMB2       |
| GeneCard | RAB40B       |
| GeneCard | ZNF566       |
| GeneCard | ST6GALNAC6   |
| GeneCard | STARD6       |
| GeneCard | MAGEA2B      |
| GeneCard | TRIM52       |
| GeneCard | SLC7A4       |
| GeneCard | OXSM         |
| GeneCard | GTPBP8       |
| GeneCard | ZSCAN5A      |
| GeneCard | SLFN12       |
| GeneCard | C7orf31      |
| GeneCard | RPPH1        |
| GeneCard | ANKRD39      |
| GeneCard | ATP23        |
| GeneCard | MED11        |
| GeneCard | SNRNP48      |
| GeneCard | SEMA4C       |
| GeneCard | FMC1         |
| GeneCard | JPT2         |
| GeneCard | EFCAB10      |
| GeneCard | LINC01590    |
| GeneCard | LINC00587    |
| GeneCard | MIR4688      |
| GeneCard | MIR3160-1    |
| GeneCard | MIR3160-2    |
| GeneCard | SMILR        |
| GeneCard | FAM240B      |
| GeneCard | MIR4695      |
| GeneCard | LINC02520    |
| GeneCard | INHCAP       |
| GeneCard | LOC101929258 |
| GeneCard | HAUS4        |
| GeneCard | TMEM176B     |
| GeneCard | PCDH8        |
| GeneCard | IMP4         |
| GeneCard | ERVK13-1     |
| GeneCard | TCAM1P       |
| GeneCard | LINC01117    |
| GeneCard | LINC01271    |
| GeneCard | LINC01505    |
| GeneCard | LINC01748    |
| GeneCard | MIR3150BHG   |
| GeneCard | TEX36-AS1    |
| GeneCard | LOC101929237 |
| GeneCard | LOC101927533 |
| GeneCard | LINC02109    |
| GeneCard | LINC02208    |
| GeneCard | PSMD10P1     |

|          |                   |
|----------|-------------------|
| GeneCard | RPL10AP6          |
| GeneCard | LOC105373159      |
| GeneCard | HMGN2P19          |
| GeneCard | LINC01765         |
| GeneCard | LINC02667         |
| GeneCard | LINC02576         |
| GeneCard | PHC1P1            |
| GeneCard | MADD-AS1          |
| GeneCard | RPL12P37          |
| GeneCard | RPL7AP70          |
| GeneCard | ENSG00000232043   |
| GeneCard | ENSG00000234255   |
| GeneCard | ENSG00000250850   |
| GeneCard | ENSG00000253878   |
| GeneCard | ENSG00000255446   |
| GeneCard | ENSG00000267174   |
| GeneCard | ENSG00000255126   |
| GeneCard | ADAMTS7P3         |
| GeneCard | SNRPEP4           |
| GeneCard | RPL7AP20          |
| GeneCard | ENSG00000226334   |
| GeneCard | ENSG00000229751   |
| GeneCard | ENSG00000251867   |
| GeneCard | ENSG00000254459   |
| GeneCard | HSPA8P15          |
| GeneCard | LINC01916         |
| GeneCard | RN7SKP27          |
| GeneCard | RN7SL636P         |
| GeneCard | RNU6-381P         |
| GeneCard | RN7SL299P         |
| GeneCard | RNA5SP189         |
| GeneCard | ENSG00000282246   |
| GeneCard | ENSG00000253252   |
| GeneCard | ANAPC1P3          |
| GeneCard | CYCSP17           |
| GeneCard | OTX2P1            |
| GeneCard | RAP1BP2           |
| GeneCard | SALL4P5           |
| GeneCard | RN7SKP93          |
| GeneCard | RN7SL714P         |
| GeneCard | RN7SL766P         |
| GeneCard | RNU1-148P         |
| GeneCard | RN7SKP168         |
| GeneCard | RN7SL700P         |
| GeneCard | RNU1-18P          |
| GeneCard | RNU6-649P         |
| GeneCard | HSALNG0045503     |
| GeneCard | lnc-GLIS3-2       |
| GeneCard | lnc-CEP295NL-1    |
| GeneCard | RF00017-4572      |
| GeneCard | lnc-ZCCHC7-6      |
| GeneCard | RNU7-188P         |
| GeneCard | HSALNG0011363     |
| GeneCard | HSALNG0030569-001 |
| GeneCard | lnc-NIPSNAP3B-4   |
| GeneCard | lnc-FST-6         |
| GeneCard | lnc-BRI3BP-7      |
| GeneCard | lnc-ETS1-8        |

|          |                 |
|----------|-----------------|
| GeneCard | HSALNG0071020   |
| GeneCard | HSALNG0071021   |
| GeneCard | lnc-RNF38-4-002 |
| GeneCard | lnc-RUNX3-3     |
| GeneCard | RF00017-1223    |
| GeneCard | piR-47675-007   |
| GeneCard | RF00017-1349    |
| GeneCard | RF00017-4574    |
| GeneCard | ENSG00000228165 |
| GeneCard | ENSG00000230495 |
| GeneCard | RF00017-6424    |
| GeneCard | RF00017-6408    |
| GeneCard | MTCYBP27        |
| GeneCard | MTCYBP36        |
| GeneCard | FJ601684-376    |
| GeneCard | LOC105376031    |
| GeneCard | HSALNG0080722   |
| GeneCard | HSALNG0067061   |
| GeneCard | HSALNG0113014   |
| GeneCard | HSALNG0063889   |
| GeneCard | HSALNG0101148   |
| GeneCard | MK280144-551    |
| GeneCard | piR-31937-039   |
| GeneCard | piR-57133-043   |
| GeneCard | piR-43107-305   |
| GeneCard | RF00697-002     |
| GeneCard | HSALNG0008250   |
| GeneCard | HSALNG0066501   |
| GeneCard | lnc-USP36-3     |
| GeneCard | SENP2           |
| GeneCard | PDILT           |
| GeneCard | ZGRF1           |
| GeneCard | UBE2F           |
| GeneCard | ZNF696          |
| GeneCard | SPSB4           |
| GeneCard | SERTAD1         |
| GeneCard | ZBTB49          |
| GeneCard | MED28           |
| GeneCard | CT75            |
| GeneCard | MIPEPP2         |
| GeneCard | CNOT10          |
| GeneCard | RTL8A           |
| GeneCard | NEDD8-MDP1      |
| GeneCard | FN3KRP          |
| GeneCard | GRAMD4          |
| GeneCard | PLAAT5          |
| GeneCard | WBP2NL          |
| GeneCard | RNR1            |
| GeneCard | FAM133B         |
| GeneCard | ETV3            |
| GeneCard | H2BC3           |
| GeneCard | SMIM12          |
| GeneCard | ANKZF1          |
| GeneCard | GOLGA7          |
| GeneCard | FOLR3           |
| GeneCard | DDX49           |
| GeneCard | ZNF90           |
| GeneCard | SNORD17         |

|          |            |
|----------|------------|
| GeneCard | DST-AS1    |
| GeneCard | MIR6124    |
| GeneCard | RWDD4      |
| GeneCard | CIDEB      |
| GeneCard | YPEL3      |
| GeneCard | DLG2-AS1   |
| GeneCard | BBLN       |
| GeneCard | C16orf87   |
| GeneCard | C2orf83    |
| GeneCard | NPIP3      |
| GeneCard | SDR42E2    |
| GeneCard | TOMM5      |
| GeneCard | EDF1       |
| GeneCard | RPUSD4     |
| GeneCard | C1orf131   |
| GeneCard | CENPH      |
| GeneCard | BTG2       |
| GeneCard | MGST1      |
| GeneCard | RWDD2B     |
| GeneCard | WDR89      |
| GeneCard | BMF        |
| GeneCard | ZACN       |
| GeneCard | NDFIP2     |
| GeneCard | REX1BD     |
| GeneCard | ING2       |
| GeneCard | H2AZ2      |
| GeneCard | DUSP4      |
| GeneCard | LRP3       |
| GeneCard | PLBD1      |
| GeneCard | TSKS       |
| GeneCard | GAGE1      |
| GeneCard | H2BC9      |
| GeneCard | AFM        |
| GeneCard | EPB41L4A   |
| GeneCard | FMO6P      |
| GeneCard | RAB39A     |
| GeneCard | SPIC       |
| GeneCard | ASCC3      |
| GeneCard | ZMAT2      |
| GeneCard | CBWD1      |
| GeneCard | PAG1       |
| GeneCard | HAUS1      |
| GeneCard | UGGT1      |
| GeneCard | MARF1      |
| GeneCard | RAB43      |
| GeneCard | CCDC106    |
| GeneCard | INIP       |
| GeneCard | CCER1      |
| GeneCard | OIP5       |
| GeneCard | UBQLNL     |
| GeneCard | ZNF322     |
| GeneCard | DDX55      |
| GeneCard | CACTIN-AS1 |
| GeneCard | MIR924HG   |
| GeneCard | LIN28B-AS1 |
| GeneCard | MIR4462    |
| GeneCard | NPM1P13    |
| GeneCard | KCTD9P6    |



|          |                 |
|----------|-----------------|
| GeneCard | ENSG00000273217 |
| GeneCard | MTCL1P1         |
| GeneCard | GUCD1           |
| GeneCard | FBXO15          |
| GeneCard | FAM47B          |
| GeneCard | RSPH10B2        |
| GeneCard | PRAMEF17        |
| GeneCard | ENKD1           |
| GeneCard | PRANCR          |
| GeneCard | TAF1B           |
| GeneCard | LDHAL6B         |
| GeneCard | CDC26           |
| GeneCard | CRYBG1          |
| GeneCard | DNTTIP1         |
| GeneCard | ZNF697          |
| GeneCard | EMC2            |
| GeneCard | TRIM16          |
| GeneCard | SERP1           |
| GeneCard | MRFAP1L1        |
| GeneCard | MIR4686         |
| GeneCard | TBC1D10C        |
| GeneCard | HK3             |
| GeneCard | PFKFB1          |
| GeneCard | FOXD4L6         |
| GeneCard | PGLYRP3         |
| GeneCard | RLF             |
| GeneCard | DSCC1           |
| GeneCard | GMCL1           |
| GeneCard | BUD31           |
| GeneCard | MED19           |
| GeneCard | DUSP21          |
| GeneCard | NUFIP2          |
| GeneCard | OLFML2A         |
| GeneCard | HDDC3           |
| GeneCard | SPINK13         |
| GeneCard | GLOD4           |
| GeneCard | SIGLEC11        |
| GeneCard | EGFEM1P         |
| GeneCard | RRN3P1          |
| GeneCard | NEGR1-IT1       |
| GeneCard | LOC652276       |
| GeneCard | C2orf92         |
| GeneCard | PLA2G12A        |
| GeneCard | RAB13           |
| GeneCard | LGALS9C         |
| GeneCard | SPINK6          |
| GeneCard | LINC01626       |
| GeneCard | METTL2B         |
| GeneCard | CD300LB         |
| GeneCard | POMZP3          |
| GeneCard | CATIP           |
| GeneCard | MFSD13A         |
| GeneCard | CMTM3           |
| GeneCard | FAM32A          |
| GeneCard | C9orf43         |
| GeneCard | DDA1            |
| GeneCard | DOCK10          |
| GeneCard | TFAP4           |

|          |              |
|----------|--------------|
| GeneCard | UBQLN3       |
| GeneCard | LILRA5       |
| GeneCard | PPP1R42      |
| GeneCard | RAD51AP2     |
| GeneCard | KRTAP7-1     |
| GeneCard | LINC00477    |
| GeneCard | EXOC1L       |
| GeneCard | LINC01340    |
| GeneCard | OSER1-DT     |
| GeneCard | FTH1P5       |
| GeneCard | ZNF75CP      |
| GeneCard | NPEPPSP1     |
| GeneCard | SPON1-AS1    |
| GeneCard | RNU7-62P     |
| GeneCard | C9orf24      |
| GeneCard | CA7          |
| GeneCard | ATG10        |
| GeneCard | PELO         |
| GeneCard | ANAPC11      |
| GeneCard | CRIP2        |
| GeneCard | C1orf115     |
| GeneCard | PKMYT1       |
| GeneCard | UTP23        |
| GeneCard | ADAD2        |
| GeneCard | C10orf90     |
| GeneCard | ZFHX2        |
| GeneCard | SCAND2P      |
| GeneCard | LRRC2-AS1    |
| GeneCard | ZNF440       |
| GeneCard | MTURN        |
| GeneCard | FAM9A        |
| GeneCard | RPL26P32     |
| GeneCard | SPATA4       |
| GeneCard | CDS2         |
| GeneCard | ACTL7A       |
| GeneCard | KLHL35       |
| GeneCard | LYG1         |
| GeneCard | PCP4         |
| GeneCard | ALKBH7       |
| GeneCard | APOBR        |
| GeneCard | PLEKHS1      |
| GeneCard | AUNIP        |
| GeneCard | SPINDOC      |
| GeneCard | FOXJ2        |
| GeneCard | RASL10B      |
| GeneCard | TSNAXIP1     |
| GeneCard | PNMA5        |
| GeneCard | FAM214A      |
| GeneCard | FAM181A      |
| GeneCard | SMIM24       |
| GeneCard | C8orf44-SGK3 |
| GeneCard | FAM106A      |
| GeneCard | MIR4752      |
| GeneCard | VSIG10L2     |
| GeneCard | LINC00653    |
| GeneCard | MAILR        |
| GeneCard | FNTAP1       |
| GeneCard | MIR4643      |

|          |            |
|----------|------------|
| GeneCard | LOC440311  |
| GeneCard | DTX3L      |
| GeneCard | ZC2HC1A    |
| GeneCard | PLPP1      |
| GeneCard | SNX21      |
| GeneCard | NUDT9      |
| GeneCard | LINC01722  |
| GeneCard | RPL29P12   |
| GeneCard | SPANXC     |
| GeneCard | KCTD16     |
| GeneCard | SIRPG      |
| GeneCard | ZNF720     |
| GeneCard | WDR88      |
| GeneCard | KCTD18     |
| GeneCard | FBXO4      |
| GeneCard | ZNF24      |
| GeneCard | ISOC2      |
| GeneCard | DDX42      |
| GeneCard | TCEAL8     |
| GeneCard | GALNT6     |
| GeneCard | VCY1B      |
| GeneCard | CDPF1      |
| GeneCard | ESYT2      |
| GeneCard | MAGEB18    |
| GeneCard | PHF20L1    |
| GeneCard | SASH3      |
| GeneCard | CCDC15     |
| GeneCard | COMMD3     |
| GeneCard | EDRF1      |
| GeneCard | FBXW8      |
| GeneCard | NCEH1      |
| GeneCard | TTC33      |
| GeneCard | ZNF281     |
| GeneCard | MORF4L2    |
| GeneCard | KIAA1143   |
| GeneCard | LENG8      |
| GeneCard | JHY        |
| GeneCard | PLEKHJ1    |
| GeneCard | CHAC2      |
| GeneCard | HINT3      |
| GeneCard | C3orf33    |
| GeneCard | LRRC42     |
| GeneCard | SPANXN3    |
| GeneCard | ORM2       |
| GeneCard | SPINT3     |
| GeneCard | ILKAP      |
| GeneCard | OBI1       |
| GeneCard | LRATD1     |
| GeneCard | FBXW9      |
| GeneCard | ZNF35      |
| GeneCard | PPTC7      |
| GeneCard | APMAP      |
| GeneCard | BTF3       |
| GeneCard | PRSS33     |
| GeneCard | NUP62CL    |
| GeneCard | ANKRD36BP1 |
| GeneCard | ASB2       |
| GeneCard | PDZD4      |

|          |              |
|----------|--------------|
| GeneCard | ASB9         |
| GeneCard | SLU7         |
| GeneCard | KRTAP3-1     |
| GeneCard | PROSER2      |
| GeneCard | CDC37L1      |
| GeneCard | KLHL23       |
| GeneCard | LURAP1       |
| GeneCard | OR7A5        |
| GeneCard | PPM1N        |
| GeneCard | R3HDM4       |
| GeneCard | OR4S1        |
| GeneCard | TRIQK        |
| GeneCard | GOLGA6L3     |
| GeneCard | LINC00634    |
| GeneCard | FOXO3B       |
| GeneCard | LINC00158    |
| GeneCard | USP32P2      |
| GeneCard | MYO16-AS1    |
| GeneCard | SNORD23      |
| GeneCard | SNORD35A     |
| GeneCard | SNORD67      |
| GeneCard | WAC-AS1      |
| GeneCard | LINC00564    |
| GeneCard | LINC00692    |
| GeneCard | LINC01460    |
| GeneCard | LINC00348    |
| GeneCard | LINC01181    |
| GeneCard | SNORD111     |
| GeneCard | SEC24B-AS1   |
| GeneCard | ZBED5-AS1    |
| GeneCard | KDM4A-AS1    |
| GeneCard | HMGA2-AS1    |
| GeneCard | HID1-AS1     |
| GeneCard | FAM172BP     |
| GeneCard | LINC01579    |
| GeneCard | LINC01222    |
| GeneCard | LINC00424    |
| GeneCard | LINC00457    |
| GeneCard | LINC01023    |
| GeneCard | LINC01151    |
| GeneCard | LINC01208    |
| GeneCard | PCOLCE-AS1   |
| GeneCard | LOC100506178 |
| GeneCard | CDC42-IT1    |
| GeneCard | CETN4P       |
| GeneCard | LINC02268    |
| GeneCard | LINC02532    |
| GeneCard | RPL17P39     |
| GeneCard | STAU2-AS1    |
| GeneCard | LOC100506606 |
| GeneCard | A2ML1-AS2    |
| GeneCard | HNRNPKP3     |
| GeneCard | HYI-AS1      |
| GeneCard | LINC01801    |
| GeneCard | LINC00377    |
| GeneCard | LINC02044    |
| GeneCard | LINC02150    |
| GeneCard | LINC02204    |

|          |                 |
|----------|-----------------|
| GeneCard | MIR548Y         |
| GeneCard | MIR548AB        |
| GeneCard | LINC02325       |
| GeneCard | MAP3K2-DT       |
| GeneCard | LINC02762       |
| GeneCard | LINC01445       |
| GeneCard | LINC02518       |
| GeneCard | LINC02716       |
| GeneCard | MUC12-AS1       |
| GeneCard | RALGAPA1P1      |
| GeneCard | SMG1P1          |
| GeneCard | ZNF30-AS1       |
| GeneCard | LOC101926964    |
| GeneCard | LOC101928651    |
| GeneCard | LOC101928725    |
| GeneCard | D21S2088E       |
| GeneCard | EDIL3-DT        |
| GeneCard | CHN2-AS1        |
| GeneCard | GALNT7-DT       |
| GeneCard | LHX1-DT         |
| GeneCard | LINC01960       |
| GeneCard | LINC02181       |
| GeneCard | LINC02233       |
| GeneCard | LINC02254       |
| GeneCard | OR7E89P         |
| GeneCard | MIR4531         |
| GeneCard | LINC02763       |
| GeneCard | LINC01712       |
| GeneCard | LINC02535       |
| GeneCard | LINC02653       |
| GeneCard | MFSD13B         |
| GeneCard | TMCC1-DT        |
| GeneCard | RPL3P4          |
| GeneCard | TMEM202-AS1     |
| GeneCard | RNU4-8P         |
| GeneCard | NOP53-AS1       |
| GeneCard | ENSG00000260306 |
| GeneCard | BSG-AS1         |
| GeneCard | BICRA-AS1       |
| GeneCard | ACSL3-AS1       |
| GeneCard | HMGB2P1         |
| GeneCard | GRAPLDR         |
| GeneCard | LINC01965       |
| GeneCard | LINC02008       |
| GeneCard | LINC02177       |
| GeneCard | LINC02205       |
| GeneCard | LINC02214       |
| GeneCard | NEPRO-AS1       |
| GeneCard | OR7E38P         |
| GeneCard | NR4A1AS         |
| GeneCard | MIR6745         |
| GeneCard | LINC01326       |
| GeneCard | LINC01838       |
| GeneCard | LINC02343       |
| GeneCard | LINC02668       |
| GeneCard | LINC01243       |
| GeneCard | MED8-AS1        |
| GeneCard | OR7E136P        |

|          |                 |
|----------|-----------------|
| GeneCard | MADCAM1-AS1     |
| GeneCard | SNORD3P1        |
| GeneCard | RPL13AP7        |
| GeneCard | RNA5SP429       |
| GeneCard | RNA5SP96        |
| GeneCard | RNU4-46P        |
| GeneCard | ENSG00000272505 |
| GeneCard | ENSG00000271155 |
| GeneCard | ENSG00000225407 |
| GeneCard | ENSG00000227531 |
| GeneCard | ENSG00000235979 |
| GeneCard | ENSG00000238279 |
| GeneCard | ENSG00000251034 |
| GeneCard | ENSG00000253851 |
| GeneCard | ENSG00000251148 |
| GeneCard | ENSG00000251171 |
| GeneCard | LOC100507472    |
| GeneCard | ENSG00000253965 |
| GeneCard | ENSG00000254632 |
| GeneCard | ENSG00000260973 |
| GeneCard | ENSG00000256083 |
| GeneCard | ENSG00000261000 |
| GeneCard | ENSG00000228005 |
| GeneCard | ENSG00000232325 |
| GeneCard | ENSG00000247970 |
| GeneCard | ENSG00000266289 |
| GeneCard | ENSG00000266521 |
| GeneCard | CTNNA1P1        |
| GeneCard | HMGB1P6         |
| GeneCard | KHDRBS2-OT1     |
| GeneCard | LINC01789       |
| GeneCard | LINC02335       |
| GeneCard | RNU6-1216P      |
| GeneCard | RNU6-786P       |
| GeneCard | RNU6ATAC22P     |
| GeneCard | RPL7P19         |
| GeneCard | RPS18P12        |
| GeneCard | SLC25A5P3       |
| GeneCard | RPL35AP4        |
| GeneCard | RPL6P13         |
| GeneCard | SNX9-AS1        |
| GeneCard | RN7SL44P        |
| GeneCard | RNU1-80P        |
| GeneCard | ENSG00000177725 |
| GeneCard | ENSG00000199713 |
| GeneCard | ENSG00000270060 |
| GeneCard | ENSG00000269807 |
| GeneCard | ENSG00000268746 |
| GeneCard | ENSG00000227554 |
| GeneCard | ENSG00000230606 |
| GeneCard | ENSG00000232692 |
| GeneCard | ENSG00000250623 |
| GeneCard | ENSG00000251205 |
| GeneCard | ENSG00000253200 |
| GeneCard | ENSG00000254002 |
| GeneCard | ENSG00000253471 |
| GeneCard | LOC101928804    |
| GeneCard | LOC101928519    |

|          |                 |
|----------|-----------------|
| GeneCard | LOC105377622    |
| GeneCard | ENSG00000257509 |
| GeneCard | ENSG00000259925 |
| GeneCard | ENSG00000267139 |
| GeneCard | ENSG00000261187 |
| GeneCard | ENSG00000267138 |
| GeneCard | ENSG00000260482 |
| GeneCard | ENSG00000260681 |
| GeneCard | ENSG00000227681 |
| GeneCard | ENSG00000266602 |
| GeneCard | ENSG00000235612 |
| GeneCard | ENSG00000237076 |
| GeneCard | ENSG00000249631 |
| GeneCard | ENSG00000125695 |
| GeneCard | E2F6P1          |
| GeneCard | ARHGAP16P       |
| GeneCard | ATP8A2P3        |
| GeneCard | HSPA8P5         |
| GeneCard | LINC02165       |
| GeneCard | OR7E59P         |
| GeneCard | LINC01868       |
| GeneCard | MIR7154         |
| GeneCard | LINC02307       |
| GeneCard | LINC02460       |
| GeneCard | LINC02503       |
| GeneCard | LINC02651       |
| GeneCard | LINC02752       |
| GeneCard | LINC02699       |
| GeneCard | RAC1P2          |
| GeneCard | PPIAP17         |
| GeneCard | PPIAP1          |
| GeneCard | OR7E109P        |
| GeneCard | RNU6-678P       |
| GeneCard | RNU6-679P       |
| GeneCard | RNU6-67P        |
| GeneCard | PRPF19P1        |
| GeneCard | RPL5P26         |
| GeneCard | TRIM51CP        |
| GeneCard | RNU2-52P        |
| GeneCard | RPL21P29        |
| GeneCard | RPL34P29        |
| GeneCard | RPL32P16        |
| GeneCard | RPS27P10        |
| GeneCard | RNU6-362P       |
| GeneCard | RNU6-412P       |
| GeneCard | RNU6-432P       |
| GeneCard | RNA5SP349       |
| GeneCard | PHBP8           |
| GeneCard | ENSG00000200506 |
| GeneCard | ENSG00000272789 |
| GeneCard | ENSG00000268093 |
| GeneCard | ENSG00000270403 |
| GeneCard | ENSG00000272008 |
| GeneCard | ENSG00000224731 |
| GeneCard | ENSG00000228737 |
| GeneCard | ENSG00000229502 |
| GeneCard | ENSG00000232693 |
| GeneCard | ENSG00000237321 |

|          |                 |
|----------|-----------------|
| GeneCard | ENSG00000253238 |
| GeneCard | ENSG00000267764 |
| GeneCard | LOC107984124    |
| GeneCard | ENSG00000254420 |
| GeneCard | ENSG00000255447 |
| GeneCard | ENSG00000254340 |
| GeneCard | ENSG00000257553 |
| GeneCard | ENSG00000260672 |
| GeneCard | ENSG00000263567 |
| GeneCard | ENSG00000267215 |
| GeneCard | ENSG00000267205 |
| GeneCard | ENSG00000233021 |
| GeneCard | ENSG00000259744 |
| GeneCard | ENSG00000259818 |
| GeneCard | ENSG00000230944 |
| GeneCard | ENSG00000237074 |
| GeneCard | DPPA3P3         |
| GeneCard | DYNLL1P4        |
| GeneCard | DNAJA1P1        |
| GeneCard | ARL2BPP7        |
| GeneCard | ATP5MFP3        |
| GeneCard | CSTP2           |
| GeneCard | IRF5P1          |
| GeneCard | HMGB3P23        |
| GeneCard | HMGN2P39        |
| GeneCard | GPS2P1          |
| GeneCard | HIGD1AP3        |
| GeneCard | HMGB3P12        |
| GeneCard | HPRT1P2         |
| GeneCard | DSTNP5          |
| GeneCard | KRT18P45        |
| GeneCard | OR7E39P         |
| GeneCard | NMNAT1P2        |
| GeneCard | MTND5P15        |
| GeneCard | MTND2P9         |
| GeneCard | MTND3P4         |
| GeneCard | MEMO1P3         |
| GeneCard | RABEPKP1        |
| GeneCard | RANP7           |
| GeneCard | RBBP4P4         |
| GeneCard | RAD23BP2        |
| GeneCard | R3HDM2P2        |
| GeneCard | LYPLA1P1        |
| GeneCard | RNU7-156P       |
| GeneCard | RNU6-1200P      |
| GeneCard | RNU7-106P       |
| GeneCard | RPL6P16         |
| GeneCard | RPS20P10        |
| GeneCard | SLC25A6P5       |
| GeneCard | SEC63P2         |
| GeneCard | RPL34P16        |
| GeneCard | RPL34P19        |
| GeneCard | RN7SKP120       |
| GeneCard | RN7SKP122       |
| GeneCard | RN7SKP141       |
| GeneCard | RNA5SP208       |
| GeneCard | RNA5SP228       |
| GeneCard | RNU6-1037P      |



|          |                 |
|----------|-----------------|
| GeneCard | RN7SL221P       |
| GeneCard | RN7SL271P       |
| GeneCard | RNA5SP140       |
| GeneCard | RN7SL782P       |
| GeneCard | RNU1-23P        |
| GeneCard | RNU4-77P        |
| GeneCard | RNU6-1060P      |
| GeneCard | RPL31P32        |
| GeneCard | RPL23AP44       |
| GeneCard | RPSAP24         |
| GeneCard | PCNPP2          |
| GeneCard | RNU6-261P       |
| GeneCard | RNU6-276P       |
| GeneCard | RNU6-280P       |
| GeneCard | RNU6-478P       |
| GeneCard | RNU7-65P        |
| GeneCard | RN7SL152P       |
| GeneCard | RN7SL825P       |
| GeneCard | RNU2-9P         |
| GeneCard | SMARCE1P4       |
| GeneCard | VDAC1P12        |
| GeneCard | LOC107985953    |
| GeneCard | UNC93B4         |
| GeneCard | ENSG00000285885 |
| GeneCard | ENSG00000286746 |
| GeneCard | ENSG00000268926 |
| GeneCard | ENSG00000273253 |
| GeneCard | ENSG00000226669 |
| GeneCard | ENSG00000235410 |
| GeneCard | ENSG00000252727 |
| GeneCard | ENSG00000253678 |
| GeneCard | LOC105375112    |
| GeneCard | LOC105375116    |
| GeneCard | ZFYVE9P2        |
| GeneCard | lnc-MCTP2-7     |
| GeneCard | lnc-MRPL39-2    |
| GeneCard | lnc-LY86-10     |
| GeneCard | lnc-MOBP-2      |
| GeneCard | lnc-ADCY10-2    |
| GeneCard | lnc-MS4A6A-1    |
| GeneCard | lnc-ZNF320-1    |
| GeneCard | lnc-WDR1-3      |
| GeneCard | LOC105378318    |
| GeneCard | ENSG00000231291 |
| GeneCard | ENSG00000242611 |
| GeneCard | ENSG00000235023 |
| GeneCard | ENSG00000234648 |
| GeneCard | ENSG00000267576 |
| GeneCard | ENSG00000201830 |
| GeneCard | RF00017-6416    |
| GeneCard | BNIP3P13        |
| GeneCard | CIR1P1          |
| GeneCard | ATP5PDP3        |
| GeneCard | AP1S2P1         |
| GeneCard | GPR160P2        |
| GeneCard | GTF2IP11        |
| GeneCard | H3P28           |
| GeneCard | HSPA8P9         |

|          |                   |
|----------|-------------------|
| GeneCard | NRBF2P3           |
| GeneCard | MARK2P15          |
| GeneCard | MFSD4BP1          |
| GeneCard | PKMP4             |
| GeneCard | NFU1P1            |
| GeneCard | NACAP6            |
| GeneCard | MTCO3P30          |
| GeneCard | RPEP2             |
| GeneCard | SNRPGP16          |
| GeneCard | RFC5P1            |
| GeneCard | RNU6-1103P        |
| GeneCard | RNU6-248P         |
| GeneCard | RNU6-363P         |
| GeneCard | RNU6-637P         |
| GeneCard | SUCLG2P4          |
| GeneCard | ENSG00000277654   |
| GeneCard | HSALNG0004778     |
| GeneCard | HSALNG0017165     |
| GeneCard | HSALNG0030571     |
| GeneCard | HSALNG0030569-002 |
| GeneCard | ENSG00000286505   |
| GeneCard | ENSG00000288100   |
| GeneCard | HE855971          |
| GeneCard | HSALNG0001373     |
| GeneCard | HSALNG0039016     |
| GeneCard | ENSG00000280434   |
| GeneCard | ENSG00000285458   |
| GeneCard | ENSG00000287449   |
| GeneCard | ENSG00000287883   |
| GeneCard | FJ601684-123      |
| GeneCard | HSALNG0004004     |
| GeneCard | HSALNG0035679     |
| GeneCard | HSALNG0045314     |
| GeneCard | ENSG00000251411   |
| GeneCard | LOC100419574      |
| GeneCard | LOC105371762      |
| GeneCard | lnc-AHR-8         |
| GeneCard | lnc-ARVCF-1       |
| GeneCard | lnc-B9D1-3        |
| GeneCard | lnc-CASTOR3-3     |
| GeneCard | lnc-CBX4-4        |
| GeneCard | lnc-CDR2-7        |
| GeneCard | lnc-CMTR1-5       |
| GeneCard | lnc-CUTA-2        |
| GeneCard | lnc-CYP1B1-7      |
| GeneCard | lnc-HAUS6-3       |
| GeneCard | lnc-HEMGN-2       |
| GeneCard | lnc-IL19-1        |
| GeneCard | lnc-IPO5-10       |
| GeneCard | lnc-KRT6A-1       |
| GeneCard | lnc-LDLRAD2-2     |
| GeneCard | lnc-PALLD-4       |
| GeneCard | lnc-PDGFA-13      |
| GeneCard | lnc-PLCG1-2       |
| GeneCard | lnc-ACTA2-2       |
| GeneCard | lnc-APOBEC4-5     |
| GeneCard | lnc-C9orf152-4    |
| GeneCard | lnc-COTL1-3       |

|          |                   |
|----------|-------------------|
| GeneCard | lnc-F13A1-5       |
| GeneCard | lnc-GEN1-1        |
| GeneCard | lnc-GNB1L-1       |
| GeneCard | lnc-HEMGN-3       |
| GeneCard | lnc-HMGA2-1       |
| GeneCard | lnc-HYI-6         |
| GeneCard | lnc-KCNV2-1       |
| GeneCard | lnc-KCNV2-5       |
| GeneCard | lnc-LIMS2-1       |
| GeneCard | lnc-LRRC32-7      |
| GeneCard | lnc-PLIN2-1       |
| GeneCard | L13304-036        |
| GeneCard | lnc-CDR2-8        |
| GeneCard | lnc-COL21A1-8     |
| GeneCard | lnc-DEPDC1B-5     |
| GeneCard | lnc-DYDC1-6       |
| GeneCard | lnc-FAM83E-2      |
| GeneCard | lnc-JAM2-1        |
| GeneCard | lnc-LTC4S-2       |
| GeneCard | lnc-NDUFS6-14     |
| GeneCard | lnc-NFIA-2        |
| GeneCard | lnc-OVOL2-1       |
| GeneCard | HSALNG0128918     |
| GeneCard | L13304-007        |
| GeneCard | lnc-ACE-5         |
| GeneCard | lnc-CHP2-1        |
| GeneCard | lnc-CMTR1-4       |
| GeneCard | lnc-FER-17        |
| GeneCard | lnc-FOXE1-1       |
| GeneCard | lnc-GFPT1-3       |
| GeneCard | lnc-H2BFS-3       |
| GeneCard | lnc-LRRC49-15     |
| GeneCard | lnc-MFAP5-4       |
| GeneCard | lnc-PDPK1-2       |
| GeneCard | HSALNG0057935     |
| GeneCard | HSALNG0082715     |
| GeneCard | HSALNG0091189     |
| GeneCard | HSALNG0091190     |
| GeneCard | HSALNG0106229     |
| GeneCard | HSALNG0106440     |
| GeneCard | HSALNG0106914-002 |
| GeneCard | HSALNG0122890     |
| GeneCard | HSALNG0122893     |
| GeneCard | HSALNG0054569     |
| GeneCard | HSALNG0084446     |
| GeneCard | HSALNG0087985     |
| GeneCard | HSALNG0120735     |
| GeneCard | HSALNG0091187     |
| GeneCard | HSALNG0092004     |
| GeneCard | HSALNG0092135-002 |
| GeneCard | HSALNG0108347     |
| GeneCard | HSALNG0067505-001 |
| GeneCard | HSALNG0068231     |
| GeneCard | HSALNG0082051     |
| GeneCard | HSALNG0103565     |
| GeneCard | HSALNG0107836     |
| GeneCard | lnc-RNF113B-5     |
| GeneCard | lnc-RPL39L-3      |

|          |                   |
|----------|-------------------|
| GeneCard | lnc-RPS27L-10     |
| GeneCard | lnc-RUBCN-8       |
| GeneCard | lnc-SIGLEC11-2    |
| GeneCard | lnc-SLC1A1-11     |
| GeneCard | lnc-SMARCC2-7-001 |
| GeneCard | lnc-SMARCC2-7-002 |
| GeneCard | lnc-SRCIN1-4      |
| GeneCard | lnc-TM2D3-2       |
| GeneCard | lnc-TXNRD2-3      |
| GeneCard | NONHSAG044482.2   |
| GeneCard | piR-31961         |
| GeneCard | piR-32677-423     |
| GeneCard | lnc-RUBCN-7       |
| GeneCard | lnc-SUZ12-8       |
| GeneCard | lnc-TMEM232-7     |
| GeneCard | lnc-TSPAN4-2      |
| GeneCard | lnc-USP48-7       |
| GeneCard | MN308698          |
| GeneCard | NONHSAG024474.2   |
| GeneCard | lnc-RIPOR3-9      |
| GeneCard | lnc-RPL18-1       |
| GeneCard | lnc-SDR42E2-1     |
| GeneCard | lnc-SLC15A1-1     |
| GeneCard | lnc-TSEN54-2      |
| GeneCard | NONHSAG008515.2   |
| GeneCard | NONHSAG024340.2   |
| GeneCard | RF00017-1938      |
| GeneCard | RF00017-2539      |
| GeneCard | RF00017-4344      |
| GeneCard | RF00017-5161      |
| GeneCard | piR-57133-321     |
| GeneCard | RF00017-253       |
| GeneCard | RF00017-4549      |
| GeneCard | lnc-SLC25A19-4    |
| GeneCard | lnc-SMIM15-3      |
| GeneCard | lnc-SMPD3-4       |
| GeneCard | lnc-TANGO2-1      |
| GeneCard | lnc-USP35-19      |
| GeneCard | MN309334          |
| GeneCard | NONHSAG024295.2   |
| GeneCard | NONHSAG031352.2   |
| GeneCard | piR-44909         |
| GeneCard | RF00017-5020      |
| GeneCard | piR-54178         |
| GeneCard | piR-61532-071     |
| GeneCard | RF00017-2801      |
| GeneCard | RF00017-4575      |
| GeneCard | RF00017-4927      |
| GeneCard | RF00017-5019      |
| GeneCard | ENSG00000237493   |
| GeneCard | ENSG00000244313   |
| GeneCard | lnc-RINT1-6       |
| GeneCard | lnc-RCL1-2        |
| GeneCard | RF00017-6042      |
| GeneCard | RF00017-6045      |
| GeneCard | RF00017-6048      |
| GeneCard | RF00017-6089      |
| GeneCard | RF00017-6092      |

|          |                   |
|----------|-------------------|
| GeneCard | RF00017-6093      |
| GeneCard | RF00017-6417      |
| GeneCard | RF00017-7260      |
| GeneCard | RF00017-6818      |
| GeneCard | RF00017-7258      |
| GeneCard | RF00017-7259      |
| GeneCard | DNAAF11P1         |
| GeneCard | PPIAP63           |
| GeneCard | PPIAP79           |
| GeneCard | MTATP6P30         |
| GeneCard | MTDHP1            |
| GeneCard | SMC4P1            |
| GeneCard | LOC105374206      |
| GeneCard | FJ601678-049      |
| GeneCard | HE856151          |
| GeneCard | HSALNG0006263-001 |
| GeneCard | HSALNG0006264     |
| GeneCard | HSALNG0013263-002 |
| GeneCard | ENSG00000276729   |
| GeneCard | HSALNG0001758     |
| GeneCard | HSALNG0013263-003 |
| GeneCard | HSALNG0013263-004 |
| GeneCard | HSALNG0032854     |
| GeneCard | HSALNG0045311     |
| GeneCard | HSALNG0001292     |
| GeneCard | HSALNG0013833     |
| GeneCard | HSALNG0037984     |
| GeneCard | HSALNG0046013     |
| GeneCard | HSALNG0001290     |
| GeneCard | HSALNG0001541     |
| GeneCard | HSALNG0035678     |
| GeneCard | HSALNG0038574-002 |
| GeneCard | HSALNG0042793     |
| GeneCard | ENSG00000248621   |
| GeneCard | LOC105372878      |
| GeneCard | HSALNG0136094     |
| GeneCard | HSALNG0136266     |
| GeneCard | lnc-CD24-3        |
| GeneCard | lnc-CEMP1-10      |
| GeneCard | lnc-EFCAB10-2     |
| GeneCard | lnc-ERCC6L2-7     |
| GeneCard | lnc-KCNJ3-7       |
| GeneCard | lnc-KIF5B-1       |
| GeneCard | lnc-LIMD2-1       |
| GeneCard | lnc-NRN1-1        |
| GeneCard | HSALNG0126886     |
| GeneCard | HSALNG0126889     |
| GeneCard | HSALNG0130766     |
| GeneCard | lnc-BAMBI-3       |
| GeneCard | lnc-C12orf49-2    |
| GeneCard | lnc-CDH6-18       |
| GeneCard | lnc-ERO1A-2       |
| GeneCard | lnc-MED8-4        |
| GeneCard | lnc-PRKD3-2       |
| GeneCard | lnc-CLEC2L-4      |
| GeneCard | lnc-DOC2A-1       |
| GeneCard | lnc-FGB-3         |
| GeneCard | HSALNG0050293     |

|          |                   |
|----------|-------------------|
| GeneCard | HSALNG0055489     |
| GeneCard | HSALNG0059742     |
| GeneCard | HSALNG0068112-002 |
| GeneCard | HSALNG0068112-003 |
| GeneCard | HSALNG0072180     |
| GeneCard | HSALNG0091496     |
| GeneCard | HSALNG0092289-001 |
| GeneCard | HSALNG0092289-002 |
| GeneCard | HSALNG0099281     |
| GeneCard | HSALNG0099369     |
| GeneCard | HSALNG0106230     |
| GeneCard | HSALNG0107002     |
| GeneCard | HSALNG0113154     |
| GeneCard | HSALNG0117999     |
| GeneCard | HSALNG0050296     |
| GeneCard | HSALNG0060082     |
| GeneCard | HSALNG0075491     |
| GeneCard | HSALNG0084042     |
| GeneCard | HSALNG0086184     |
| GeneCard | HSALNG0099280     |
| GeneCard | HSALNG0114686     |
| GeneCard | HSALNG0115121     |
| GeneCard | HSALNG0115122     |
| GeneCard | HSALNG0118739     |
| GeneCard | HSALNG0120734     |
| GeneCard | HSALNG0085883-002 |
| GeneCard | HSALNG0092135-001 |
| GeneCard | HSALNG0096321-001 |
| GeneCard | HSALNG0099368     |
| GeneCard | HSALNG0103563     |
| GeneCard | HSALNG0108635     |
| GeneCard | HSALNG0113155     |
| GeneCard | HSALNG0116176-001 |
| GeneCard | HSALNG0116176-002 |
| GeneCard | HSALNG0118743     |
| GeneCard | HSALNG0119075     |
| GeneCard | HSALNG0123261     |
| GeneCard | HSALNG0099372     |
| GeneCard | HSALNG0106942-001 |
| GeneCard | HSALNG0117163     |
| GeneCard | HSALNG0117164     |
| GeneCard | HSALNG0118742     |
| GeneCard | lnc-RPL17-3       |
| GeneCard | lnc-TMC5-2        |
| GeneCard | MK280452          |
| GeneCard | NONHSAG014173.2   |
| GeneCard | NONHSAG031788.2   |
| GeneCard | piR-38051-039     |
| GeneCard | piR-38351-103     |
| GeneCard | lnc-SYK-9         |
| GeneCard | lnc-ZHX2-3        |
| GeneCard | MK280180          |
| GeneCard | piR-31937-019     |
| GeneCard | piR-32214-246     |
| GeneCard | piR-39701-006     |
| GeneCard | lnc-SLC19A1-4     |
| GeneCard | lnc-TEX33-1       |
| GeneCard | lnc-TMEM242-11    |

|          |                   |
|----------|-------------------|
| GeneCard | Inc-WDR33-2       |
| GeneCard | MG828622          |
| GeneCard | MN298678-098      |
| GeneCard | NONHSAG042005.2   |
| GeneCard | piR-31286-002     |
| GeneCard | piR-32214-368     |
| GeneCard | piR-32214-557     |
| GeneCard | piR-38736-015     |
| GeneCard | piR-40881         |
| GeneCard | piR-45035-144     |
| GeneCard | piR-49097-104     |
| GeneCard | piR-52464         |
| GeneCard | piR-55985-053     |
| GeneCard | piR-57981         |
| GeneCard | piR-43105-107     |
| GeneCard | piR-53823         |
| GeneCard | piR-57176-535     |
| GeneCard | piR-60246-059     |
| GeneCard | RF00017-5327      |
| GeneCard | RF00017-5429      |
| GeneCard | MN297551          |
| GeneCard | piR-31210-009     |
| GeneCard | piR-38423-054     |
| GeneCard | piR-42625-021     |
| GeneCard | piR-47628-005     |
| GeneCard | piR-56037-012     |
| GeneCard | piR-57712         |
| GeneCard | RF00017-4093      |
| GeneCard | piR-48218-001     |
| GeneCard | piR-49402         |
| GeneCard | piR-55985-101     |
| GeneCard | piR-55985-185     |
| GeneCard | piR-60129         |
| GeneCard | piR-60898-001     |
| GeneCard | piR-61687-001     |
| GeneCard | RF00017-2498      |
| GeneCard | RF00017-4770      |
| GeneCard | LOC107984312      |
| GeneCard | LOC107986930      |
| GeneCard | ENSG00000248196   |
| GeneCard | ENSG00000249200   |
| GeneCard | HSALNG0047025-001 |
| GeneCard | HSALNG0047821     |
| GeneCard | piR-41245-221     |
| GeneCard | RF00017-564       |
| GeneCard | RF00017-6667      |
| GeneCard | RF00066-159       |
| GeneCard | RF00017-6972      |
| GeneCard | LOC107985536      |
| GeneCard | LOC107986178      |
| GeneCard | LOC105378208      |
| GeneCard | LOC105378209      |
| GeneCard | LOC107984380      |
| GeneCard | LOC107986016      |
| GeneCard | LOC105373581      |
| GeneCard | ENSG00000280149   |
| GeneCard | HSALNG0017166     |
| GeneCard | HSALNG0030524     |

|          |                   |
|----------|-------------------|
| GeneCard | HSALNG0044617-002 |
| GeneCard | ENSG00000279953   |
| GeneCard | HSALNG0001004     |
| GeneCard | HSALNG0005998     |
| GeneCard | HSALNG0006000     |
| GeneCard | HSALNG0008434     |
| GeneCard | HSALNG0012640     |
| GeneCard | HSALNG0016296     |
| GeneCard | HSALNG0028435     |
| GeneCard | HSALNG0030525     |
| GeneCard | HSALNG0037499     |
| GeneCard | HSALNG0037885     |
| GeneCard | FJ601678-137      |
| GeneCard | HSALNG0001291     |
| GeneCard | HSALNG0023909     |
| GeneCard | HSALNG0028082     |
| GeneCard | HSALNG0029071-002 |
| GeneCard | LOC105375964      |
| GeneCard | HSALNG0017614     |
| GeneCard | HSALNG0020420     |
| GeneCard | HSALNG0032032     |
| GeneCard | HSALNG0044328     |
| GeneCard | LOC105375328      |
| GeneCard | LOC105372106      |
| GeneCard | HSALNG0132503     |
| GeneCard | lnc-COLGALT2-6    |
| GeneCard | lnc-NEPRO-5       |
| GeneCard | HSALNG0126787     |
| GeneCard | HSALNG0130152     |
| GeneCard | HSALNG0132429     |
| GeneCard | hsa-miR-5095-477  |
| GeneCard | lnc-KLHL1-11      |
| GeneCard | lnc-MAP3K3-1      |
| GeneCard | HSALNG0132428     |
| GeneCard | hsa-miR-5095-065  |
| GeneCard | lnc-LRP4-2        |
| GeneCard | lnc-OCA2-4        |
| GeneCard | HSALNG0133645     |
| GeneCard | HSALNG0134037     |
| GeneCard | lnc-PHF23-1       |
| GeneCard | HSALNG0052523     |
| GeneCard | HSALNG0055490     |
| GeneCard | HSALNG0059720     |
| GeneCard | HSALNG0067487     |
| GeneCard | HSALNG0068116     |
| GeneCard | HSALNG0069658     |
| GeneCard | HSALNG0072660     |
| GeneCard | HSALNG0073635     |
| GeneCard | HSALNG0094761     |
| GeneCard | HSALNG0098206-002 |
| GeneCard | HSALNG0104806     |
| GeneCard | HSALNG0109037     |
| GeneCard | HSALNG0118978     |
| GeneCard | HSALNG0121848     |
| GeneCard | HSALNG0050465     |
| GeneCard | HSALNG0052525     |
| GeneCard | HSALNG0054175     |
| GeneCard | HSALNG0054198     |



|          |                   |
|----------|-------------------|
| GeneCard | HSALNG0062068-001 |
| GeneCard | HSALNG0062068-002 |
| GeneCard | HSALNG0064190     |
| GeneCard | HSALNG0066498     |
| GeneCard | HSALNG0068674     |
| GeneCard | HSALNG0078213     |
| GeneCard | HSALNG0097694     |
| GeneCard | HSALNG0108634     |
| GeneCard | HSALNG0054182     |
| GeneCard | HSALNG0056444     |
| GeneCard | HSALNG0063304     |
| GeneCard | HSALNG0068120     |
| GeneCard | HSALNG0076995-002 |
| GeneCard | HSALNG0085885     |
| GeneCard | HSALNG0092010     |
| GeneCard | HSALNG0094181     |
| GeneCard | HSALNG0094762     |
| GeneCard | HSALNG0098847     |
| GeneCard | HSALNG0108448     |
| GeneCard | HSALNG0113015     |
| GeneCard | HSALNG0119076     |
| GeneCard | HSALNG0050140     |
| GeneCard | HSALNG0059719     |
| GeneCard | HSALNG0064554     |
| GeneCard | HSALNG0068673     |
| GeneCard | HSALNG0069754     |
| GeneCard | HSALNG0073152     |
| GeneCard | HSALNG0073676-002 |
| GeneCard | HSALNG0073677     |
| GeneCard | HSALNG0076995-001 |
| GeneCard | HSALNG0083953     |
| GeneCard | HSALNG0100157     |
| GeneCard | HSALNG0121850     |
| GeneCard | lnc-SERPINI1-13   |
| GeneCard | lnc-TTLL7-10      |
| GeneCard | MN309174-341      |
| GeneCard | piR-38051-017     |
| GeneCard | piR-38580-356     |
| GeneCard | lnc-TMEM232-6     |
| GeneCard | lnc-VSNL1-6       |
| GeneCard | lnc-VSNL1-1       |
| GeneCard | MN308956          |
| GeneCard | piR-32023-213     |
| GeneCard | piR-41195-093     |
| GeneCard | lnc-RNF113B-7     |
| GeneCard | lnc-RSPH1-6       |
| GeneCard | lnc-SGPP2-1       |
| GeneCard | piR-30561         |
| GeneCard | piR-31534-512     |
| GeneCard | piR-39279-038     |
| GeneCard | piR-39655-006     |
| GeneCard | piR-39701-059     |
| GeneCard | piR-42602         |
| GeneCard | piR-43581         |
| GeneCard | piR-56580-048     |
| GeneCard | piR-57461-271     |
| GeneCard | piR-58557-058     |
| GeneCard | piR-60246-038     |

|          |                   |
|----------|-------------------|
| GeneCard | piR-61028-186     |
| GeneCard | RF00017-200       |
| GeneCard | RF00017-4477      |
| GeneCard | piR-42491-026     |
| GeneCard | piR-42799-010     |
| GeneCard | piR-43325-085     |
| GeneCard | piR-54625         |
| GeneCard | piR-54764-557     |
| GeneCard | piR-56759-398     |
| GeneCard | piR-61101-030     |
| GeneCard | RF00017-1320      |
| GeneCard | RF00017-2296      |
| GeneCard | RF00017-5470      |
| GeneCard | lnc-ZNRF4-2       |
| GeneCard | MK280607-105      |
| GeneCard | MN298644          |
| GeneCard | piR-31199-348     |
| GeneCard | piR-38426-008     |
| GeneCard | piR-38579-041     |
| GeneCard | piR-42491-133     |
| GeneCard | piR-53431-310     |
| GeneCard | piR-57460-157     |
| GeneCard | RF00017-4424      |
| GeneCard | piR-44878-019     |
| GeneCard | piR-50444-066     |
| GeneCard | piR-59928-064     |
| GeneCard | RF00017-5430      |
| GeneCard | LOC105369515      |
| GeneCard | LOC105370356      |
| GeneCard | LOC105371028      |
| GeneCard | LOC105369782      |
| GeneCard | piR-41880-009     |
| GeneCard | LOC105379188      |
| GeneCard | LOC107984408      |
| GeneCard | LOC105375532      |
| GeneCard | LOC105372492      |
| GeneCard | LOC105376219      |
| GeneCard | LOC105377124      |
| GeneCard | ENSG00000257680   |
| GeneCard | LOC107987301      |
| GeneCard | HSALNG0047025-002 |
| GeneCard | lnc-RCL1-3        |
| GeneCard | piR-41405-104     |
| GeneCard | RF00017-6443      |
| GeneCard | RF00017-5623      |
| GeneCard | RF00017-567       |
| GeneCard | RF00017-6094      |
| GeneCard | RF00026-940       |
| GeneCard | RF00017-6672      |
| GeneCard | RF00017-765       |
| GeneCard | RF01960-002       |
| GeneCard | RF00619-032       |
| GeneCard | RF00951-070       |
| GeneCard | HSALNG0042079     |
| GeneCard | HSALNG0011480     |
| GeneCard | HSALNG0024759     |
| GeneCard | HSALNG0028923     |
| GeneCard | HSALNG0029071-001 |

|          |                   |
|----------|-------------------|
| GeneCard | LOC105375411      |
| GeneCard | LOC100419959      |
| GeneCard | LOC105373902      |
| GeneCard | L13714-244        |
| GeneCard | HSALNG0062059     |
| GeneCard | HSALNG0096321-002 |
| GeneCard | HSALNG0062201     |
| GeneCard | HSALNG0084152     |
| GeneCard | HSALNG0072676     |
| GeneCard | MK280073-483      |
| GeneCard | piR-31926-034     |
| GeneCard | piR-34822-265     |
| GeneCard | piR-38257-008     |
| GeneCard | piR-60051-026     |
| GeneCard | RF00001-225       |
| GeneCard | piR-38732-017     |
| GeneCard | piR-39858-529     |
| GeneCard | piR-52261-220     |
| GeneCard | RF00017-3779      |
| GeneCard | LOC101929756      |
| GeneCard | LOC102724749      |
| GeneCard | LOC112268049      |
| GeneCard | LGALS14           |
| GeneCard | CAMK1G            |
| GeneCard | RBM46             |
| GeneCard | SNAPC3            |
| GeneCard | RINL              |
| GeneCard | PTPN7             |
| GeneCard | ZSCAN18           |
| GeneCard | C4orf46           |
| GeneCard | NXPE3             |
| GeneCard | RPUSD1            |
| GeneCard | THOC1             |
| GeneCard | C1orf116          |
| GeneCard | COL18A1-AS1       |
| GeneCard | C18orf21          |
| GeneCard | LRRC45            |
| GeneCard | SPATA12           |
| GeneCard | PRR16             |
| GeneCard | CHURC1            |
| GeneCard | ZSCAN1            |
| GeneCard | C11orf52          |
| GeneCard | DPY19L2P1         |
| GeneCard | ZFYVE21           |
| GeneCard | EVA1A             |
| GeneCard | ZFP2              |
| GeneCard | GPR52             |
| GeneCard | FPR3              |
| GeneCard | XAF1              |
| GeneCard | LRRC15            |
| GeneCard | ZNF706            |
| GeneCard | ZC3HAV1L          |
| GeneCard | ABHD17C           |
| GeneCard | NRN1L             |
| GeneCard | MAGEB6            |
| GeneCard | TYRL              |
| GeneCard | ST8SIA6           |
| GeneCard | THUMPD2           |

|          |           |
|----------|-----------|
| GeneCard | EIF1B     |
| GeneCard | CYTIP     |
| GeneCard | ZNF75A    |
| GeneCard | KRT36     |
| GeneCard | MOB3A     |
| GeneCard | ODF4      |
| GeneCard | PPIE      |
| GeneCard | LVRN      |
| GeneCard | FFAR3     |
| GeneCard | ZNF329    |
| GeneCard | ZNF345    |
| GeneCard | CAPN12    |
| GeneCard | TMEM95    |
| GeneCard | MGARP     |
| GeneCard | RHOBTB3   |
| GeneCard | FMNL3     |
| GeneCard | ASB13     |
| GeneCard | WSB1      |
| GeneCard | TMEM59L   |
| GeneCard | PTTG1IP   |
| GeneCard | CHST4     |
| GeneCard | MAGEB3    |
| GeneCard | CBWD3     |
| GeneCard | MT1E      |
| GeneCard | PIN4      |
| GeneCard | ARHGAP35  |
| GeneCard | USP32     |
| GeneCard | DTX3      |
| GeneCard | GUSBP3    |
| GeneCard | TMEM115   |
| GeneCard | ZNF175    |
| GeneCard | TBC1D3P2  |
| GeneCard | DENND1C   |
| GeneCard | ACSF2     |
| GeneCard | RALGPS1   |
| GeneCard | RBM11     |
| GeneCard | RNF167    |
| GeneCard | UPP1      |
| GeneCard | DBNDD2    |
| GeneCard | PPP1R16A  |
| GeneCard | ZNF19     |
| GeneCard | DYNLRB1   |
| GeneCard | ZSCAN22   |
| GeneCard | SNX12     |
| GeneCard | PLEKHG7   |
| GeneCard | DPYSL4    |
| GeneCard | SYCE3     |
| GeneCard | GMCL2     |
| GeneCard | LANCL1    |
| GeneCard | SP140L    |
| GeneCard | BFAR      |
| GeneCard | CBX6      |
| GeneCard | SHCBP1L   |
| GeneCard | JADE3     |
| GeneCard | TSSK2     |
| GeneCard | ZNF572    |
| GeneCard | SPATS1    |
| GeneCard | C20orf141 |

|          |              |
|----------|--------------|
| GeneCard | LRRC61       |
| GeneCard | MORN4        |
| GeneCard | CNTNAP4      |
| GeneCard | RAB6D        |
| GeneCard | ZNF670       |
| GeneCard | FASTKD1      |
| GeneCard | GRAMD1C      |
| GeneCard | KLF8         |
| GeneCard | TTC23L       |
| GeneCard | RGS18        |
| GeneCard | ZNF436       |
| GeneCard | OCEL1        |
| GeneCard | UBXN2A       |
| GeneCard | TSSK6        |
| GeneCard | CRCT1        |
| GeneCard | ERP27        |
| GeneCard | RPL18P7      |
| GeneCard | PTPN18       |
| GeneCard | BEND2        |
| GeneCard | HAGHL        |
| GeneCard | EVA1B        |
| GeneCard | ANKRD42      |
| GeneCard | USP5         |
| GeneCard | LOC111255645 |
| GeneCard | RIMKLA       |
| GeneCard | ZNF219       |
| GeneCard | TTC4P1       |
| GeneCard | GPR160       |
| GeneCard | TUBA4B       |
| GeneCard | ARID5A       |
| GeneCard | C19orf25     |
| GeneCard | RPL23AP28    |
| GeneCard | CCDC144NL    |
| GeneCard | PLAAT1       |
| GeneCard | NMRAL1       |
| GeneCard | RXFP3        |
| GeneCard | C6orf141     |
| GeneCard | FAM221A      |
| GeneCard | FDPSP4       |
| GeneCard | ZNF649       |
| GeneCard | SH3BP5L      |
| GeneCard | COMMD4       |
| GeneCard | SPIN2B       |
| GeneCard | ZNF286A      |
| GeneCard | UBBP1        |
| GeneCard | FSD1L        |
| GeneCard | MIR644A      |
| GeneCard | HMG2         |
| GeneCard | DHRS1        |
| GeneCard | SPATA2L      |
| GeneCard | LETM2        |
| GeneCard | CPED1        |
| GeneCard | EBF4         |
| GeneCard | UBXN8        |
| GeneCard | CPA2         |
| GeneCard | HSFY2        |
| GeneCard | ZMYND12      |
| GeneCard | FAM78A       |

|          |              |
|----------|--------------|
| GeneCard | HAUS7        |
| GeneCard | FAM53A       |
| GeneCard | HSPA13       |
| GeneCard | METTL7A      |
| GeneCard | PHOSPHO2     |
| GeneCard | ZRSR2P1      |
| GeneCard | BEND5        |
| GeneCard | G2E3         |
| GeneCard | CCDC9        |
| GeneCard | TRIM49       |
| GeneCard | CDRT15P3     |
| GeneCard | TMEM25       |
| GeneCard | APOL6        |
| GeneCard | CSNK1G3      |
| GeneCard | OSCP1        |
| GeneCard | SERTM1       |
| GeneCard | PWAR5        |
| GeneCard | PRPF39       |
| GeneCard | ZNF639       |
| GeneCard | CLDN20       |
| GeneCard | LRRN2        |
| GeneCard | FAM126B      |
| GeneCard | NAP1L3       |
| GeneCard | LINC00518    |
| GeneCard | ZNF138       |
| GeneCard | CCNJL        |
| GeneCard | ZNF419       |
| GeneCard | GPR61        |
| GeneCard | LINC00663    |
| GeneCard | LOC101927502 |
| GeneCard | TMEM35A      |
| GeneCard | OR2W1        |
| GeneCard | GPR6         |
| GeneCard | ZC3H3        |
| GeneCard | STMN4        |
| GeneCard | SSU72        |
| GeneCard | TMEM54       |
| GeneCard | UBOX5        |
| GeneCard | RPL21P108    |
| GeneCard | FAM104A      |
| GeneCard | NAP1L5       |
| GeneCard | ZCCHC2       |
| GeneCard | ASAP3        |
| GeneCard | C1orf216     |
| GeneCard | MIR3130-1    |
| GeneCard | ZNF57        |
| GeneCard | RHOXF2       |
| GeneCard | CRYBG3       |
| GeneCard | BIN2         |
| GeneCard | JTB          |
| GeneCard | FAM72B       |
| GeneCard | C6orf201     |
| GeneCard | CLIP3        |
| GeneCard | NACAD        |
| GeneCard | ZNF524       |
| GeneCard | TMEM121      |
| GeneCard | TPRXL        |
| GeneCard | TM9SF1       |

|          |            |
|----------|------------|
| GeneCard | HMGB4      |
| GeneCard | UBE2DNL    |
| GeneCard | NMRK1      |
| GeneCard | SPRR4      |
| GeneCard | TENM3-AS1  |
| GeneCard | TMEM141    |
| GeneCard | CRYBG2     |
| GeneCard | TEX37      |
| GeneCard | RPS17P5    |
| GeneCard | HSPA7      |
| GeneCard | GPR75      |
| GeneCard | GPX1P2     |
| GeneCard | CMTM2      |
| GeneCard | FAM200A    |
| GeneCard | YAE1       |
| GeneCard | CFAP299    |
| GeneCard | BEX5       |
| GeneCard | TSACC      |
| GeneCard | GPCPD1     |
| GeneCard | TPD52L3    |
| GeneCard | ANKRD45    |
| GeneCard | LSMEM1     |
| GeneCard | SULT1B1    |
| GeneCard | SERPINA13P |
| GeneCard | MIR2113    |
| GeneCard | C11orf53   |
| GeneCard | ZNF124     |
| GeneCard | EMC6       |
| GeneCard | SLFNL1     |
| GeneCard | CCDC149    |
| GeneCard | TARP       |
| GeneCard | PHLDA3     |
| GeneCard | OSTCP1     |
| GeneCard | ECI1       |
| GeneCard | ZNF497     |
| GeneCard | C11orf71   |
| GeneCard | PEAK1      |
| GeneCard | LCE2A      |
| GeneCard | EIF4A1P6   |
| GeneCard | PCSK4      |
| GeneCard | RNU7-24P   |
| GeneCard | WFDC5      |
| GeneCard | FAAH2      |
| GeneCard | RPS3AP1    |
| GeneCard | THEG       |
| GeneCard | OR1E1      |
| GeneCard | RPSAP20    |
| GeneCard | CPSF1P1    |
| GeneCard | RPL17P37   |
| GeneCard | RPL31P36   |
| GeneCard | UBE2D3P2   |
| GeneCard | SMIM11     |
| GeneCard | SIAH3      |
| GeneCard | H2AC6      |
| GeneCard | RASL11B    |
| GeneCard | C19orf18   |
| GeneCard | TEX19      |
| GeneCard | CRYAA2     |

|          |           |
|----------|-----------|
| GeneCard | DLSTP1    |
| GeneCard | ARL5A     |
| GeneCard | C8orf48   |
| GeneCard | C2orf15   |
| GeneCard | DENND6B   |
| GeneCard | FRG1BP    |
| GeneCard | FAM74A4   |
| GeneCard | OR4D6     |
| GeneCard | PP2D1     |
| GeneCard | BCL2L10   |
| GeneCard | FAM240A   |
| GeneCard | MOGAT3    |
| GeneCard | RNF208    |
| GeneCard | SHLD1     |
| GeneCard | DTD2      |
| GeneCard | RNASE11   |
| GeneCard | TEX44     |
| GeneCard | PNMA6F    |
| GeneCard | RPS7P8    |
| GeneCard | FRMD6-AS2 |
| GeneCard | BDH2P1    |
| GeneCard | RPL5P2    |
| GeneCard | CTXN3     |
| GeneCard | PSME3IP1  |
| GeneCard | TRIML1    |
| GeneCard | PCDHB11   |
| GeneCard | RTP4      |
| GeneCard | LOC343052 |
| GeneCard | THAP6     |
| GeneCard | LOC642487 |
| GeneCard | RNF151    |
| GeneCard | C11orf45  |
| GeneCard | LSMEM2    |
| GeneCard | TSPY2     |
| GeneCard | HSP90AA5P |
| GeneCard | ZNF200    |
| GeneCard | FAM72A    |
| GeneCard | MT1M      |
| GeneCard | TJP3      |
| GeneCard | PCDHGC5   |
| GeneCard | FITM1     |
| GeneCard | C22orf46  |
| GeneCard | BIN3-IT1  |
| GeneCard | HERC2P9   |
| GeneCard | SLIT1-AS1 |
| GeneCard | LOC403312 |
| GeneCard | DPY19L2P4 |
| GeneCard | NUDT16L2P |
| GeneCard | LOC254896 |
| GeneCard | IQCF2     |
| GeneCard | FCF1      |
| GeneCard | MIR519B   |
| GeneCard | LINC02085 |
| GeneCard | LRRC66    |
| GeneCard | ANKRD7    |
| GeneCard | DAPP1     |
| GeneCard | EML2      |
| GeneCard | ZNF449    |



|          |              |
|----------|--------------|
| GeneCard | CXorf38      |
| GeneCard | H3-5         |
| GeneCard | PCDHB10      |
| GeneCard | METTL2A      |
| GeneCard | KRTAP19-5    |
| GeneCard | CLUHP3       |
| GeneCard | ADH5P2       |
| GeneCard | SLC16A6      |
| GeneCard | MIR3130-2    |
| GeneCard | GOT1L1       |
| GeneCard | KRTAP13-3    |
| GeneCard | KRTAP8-1     |
| GeneCard | KRTAP19-1    |
| GeneCard | KRTAP19-7    |
| GeneCard | GOLGA2P5     |
| GeneCard | NCBP2AS2     |
| GeneCard | ZHX1-C8orf76 |
| GeneCard | LRRC52-AS1   |
| GeneCard | NOS2P2       |
| GeneCard | MPND         |
| GeneCard | AKR1C8P      |
| GeneCard | TEX55        |
| GeneCard | PTGES2-AS1   |
| GeneCard | ZC3H12B      |
| GeneCard | CCDC54       |
| GeneCard | SLC25A5P2    |
| GeneCard | MIR626       |
| GeneCard | NSG1         |
| GeneCard | TESK1        |
| GeneCard | GOT2P1       |
| GeneCard | MIR5588      |
| GeneCard | SCART1       |
| GeneCard | MRPS33P2     |
| GeneCard | PLEKHA2      |
| GeneCard | RPL31P12     |
| GeneCard | RPL29P29     |
| GeneCard | GSKIP        |
| GeneCard | RPL18P1      |
| GeneCard | DDO          |
| GeneCard | PURG         |
| GeneCard | PTMAP5       |
| GeneCard | RPL21P99     |
| GeneCard | ZNF717       |
| GeneCard | RPL12P34     |
| GeneCard | ARIH2P1      |
| GeneCard | VN1R95P      |
| GeneCard | DISP3        |
| GeneCard | HSPD1P9      |
| GeneCard | RPL9P23      |
| GeneCard | RPSAP43      |
| GeneCard | ARL14        |
| GeneCard | LOC110740340 |
| GeneCard | MEIS3P1      |
| GeneCard | KRT18P24     |
| GeneCard | RPL31P39     |
| GeneCard | KLHL5        |
| GeneCard | C9orf135     |
| GeneCard | PMCHL1       |

|          |              |
|----------|--------------|
| GeneCard | ZNF385A      |
| GeneCard | RPL21P46     |
| GeneCard | SSH2         |
| GeneCard | C16orf78     |
| GeneCard | RPL38P2      |
| GeneCard | RPL22P22     |
| GeneCard | MRPS36P3     |
| GeneCard | FKBP3        |
| GeneCard | ABHD14B      |
| GeneCard | RPL21P43     |
| GeneCard | WDR11-AS1    |
| GeneCard | RRM2P4       |
| GeneCard | RPL27AP8     |
| GeneCard | OR2BH1P      |
| GeneCard | PPIHP2       |
| GeneCard | RPS2P38      |
| GeneCard | UBQLN4P2     |
| GeneCard | ZNF641       |
| GeneCard | RSL24D1P11   |
| GeneCard | PCBP2P3      |
| GeneCard | UNGP2        |
| GeneCard | ATP6V0B      |
| GeneCard | TYMSOS       |
| GeneCard | TERF1P3      |
| GeneCard | MRPS33P3     |
| GeneCard | RPL11P3      |
| GeneCard | RPL4P2       |
| GeneCard | LOC101929279 |
| GeneCard | OR6X1        |
| GeneCard | RACK1P1      |
| GeneCard | GOLGA8M      |
| GeneCard | OR51A1P      |
| GeneCard | RPL17P6      |
| GeneCard | RPL12P24     |
| GeneCard | OR55B1P      |
| GeneCard | ST13P9       |
| GeneCard | RPS25P2      |
| GeneCard | MIR525       |
| GeneCard | ALDH7A1P1    |
| GeneCard | FAM27E3      |
| GeneCard | FOLH1B       |
| GeneCard | ZNF486       |
| GeneCard | MT1XP1       |
| GeneCard | PLEKHF1      |
| GeneCard | OR6B3        |
| GeneCard | PCNX4        |
| GeneCard | TBC1D26      |
| GeneCard | PABPC1P1     |
| GeneCard | ADAM3B       |
| GeneCard | GOLGA8R      |
| GeneCard | DIAPH3-AS2   |

Supplementary Table 4

The Hub Target Genes

PGR  
PTGS1  
PTGS2  
HSP90AA1  
PIK3CG  
AKR1B10  
JUN  
IL13  
PPARG  
MPL  
IL1B  
APOA2  
GGH  
SHMT2  
ALOX5  
SERPINE1  
MTNR1A  
MTNR1B  
HTR2C  
ESR1  
RXRA  
ADRB2  
PRKACA  
MAOB  
SLC6A4  
AR  
DPP4  
PRSS1  
RELA  
AKT1  
BCL2  
FOS  
BAX  
MMP9  
CASP3  
TP63  
HIF1A  
FOSL1  
FOSL2  
CCNB1  
MPO  
AHR  
IGF2  
CYCS  
ALOX12  
NFATC1  
EGLN1  
APOD  
NOS2  
ESR2  
MAPK14  
GSK3B  
CHEK1  
CCNA2  
KCNH2  
DRD1

CHRM3  
CHRM1  
CHRM4  
ADRA1A  
CHRM2  
CHRNA2  
OPRM1  
CHRNA7  
CASP9  
CASP8  
PRKCA  
PON1  
MAP2  
NR3C2  
CDKN1A  
FASN  
SOD1  
NR1I2  
PLA2G4A  
ABCC2  
MTOR  
TOP2A  
ADRA2A  
SLC6A2  
SLC6A3  
AKR1B1  
PLAU  
LTA4H  
MAOA  
ADRB1  
F2  
F7  
IKKB  
TNFSF15  
AHSA1  
MAPK8  
MMP1  
STAT1  
HMOX1  
CYP3A4  
CYP1A1  
ICAM1  
SELE  
VCAM1  
HAS2  
PSMD3  
SLC2A4  
NR1I3  
INSR  
DIO1  
PPP3CA  
GSTM1  
SLPI  
RXRG  
NFKBIA  
CASP1  
IFNG  
ADCYAP1

PSMG1  
MAP2K4  
NR3C1  
F10  
PTPN1  
CHRM5  
OPRD1  
CACNA1S  
PDE4D  
KDR  
PYGM  
DRD5  
HRH1  
ADRA2B  
DRD2  
GABRG3  
EGFR  
CCND1  
BCL2L1  
MMP2  
MAPK1  
IL10  
RB1  
IL6  
TOP1  
MDM2  
APP  
PCNA  
ERBB2  
CASP7  
MCL1  
BIRC5  
IL2  
TYR  
IL4  
CD40LG  
PTGES  
MET  
GRIA2  
MMP3  
EIF6  
ELK1  
ODC1  
RAF1  
RUNX1T1  
CAV1  
MYC  
F3  
GJA1  
CXCL8  
PRKCB  
NOS3  
HSPB1  
PLAT  
THBD  
IL1A  
NCF1  
ABCG2

NFE2L2  
NQO1  
PARP1  
CXCL2  
CHEK2  
PPARA  
PPARD  
HSF1  
CRP  
CXCL10  
CHUK  
SPP1  
RUNX2  
E2F1  
CTSD  
IGFBP3  
ERBB3  
PCOLCE  
NPEPPS  
RASA1

Supplementary Table 5

## The Results of Molecular Docking Analysis

| Target   | MOL       | Active Compounds      | LibDock Score | Hotspots                                                                                                     |
|----------|-----------|-----------------------|---------------|--------------------------------------------------------------------------------------------------------------|
| HSP90AA1 | MOL000098 | quercetin             | 87.0016       | 32.50,12.88,22.57,A,33,2<br>31.50,7.28,27.17,A,68,12<br>29.10,11.07,24.97,P,57,2<br>31.90,7.47,28.37,A,81,11 |
| HSP90AA1 | MOL000006 | luteolin              | 105.736       | 30.10,11.68,22.97,A,37,1<br>5<br>34.10,10.88,24.37,A,53,6                                                    |
| HSP90AA1 | MOL000358 | beta-sitosterol       | 111.251       | 30.10,11.68,22.97,A,37,1<br>6<br>31.90,6.08,31.37,A,88,3                                                     |
| HSP90AA1 | MOL000359 | sitosterol            | 108.553       | 34.10,12.28,23.77,A,47,1<br>9<br>32.50,12.88,22.57,A,33,9                                                    |
| HSP90AA1 | MOL000422 | kaempferol            | 84.5532       | 29.10,11.07,24.97,P,57,11<br>31.50,7.28,27.17,A,68,17<br>30.10,11.68,22.97,A,37,3                            |
| HSP90AA1 | MOL000449 | Stigmasterol          | 111.732       | 34.10,10.88,24.37,A,53,7<br>31.30,12.07,19.97,P,29,3<br>32.50,12.88,22.57,A,33,8                             |
| HSP90AA1 | MOL000622 | Magnograndiolide      | 86.0255       | 30.30,11.88,20.97,P,37,14<br>30.90,8.68,27.57,A,74,19<br>30.90,8.68,27.57,A,74,8                             |
| HSP90AA1 | MOL000787 | Fumarine              | 120.724       | 29.10,11.07,24.97,P,57,17<br>29.10,13.28,20.37,P,33,2<br>30.10,11.68,22.97,A,37,6                            |
| HSP90AA1 | MOL001510 | 24-epicampesterol     | 112.466       | 34.10,10.88,24.37,A,53,8<br>31.30,12.07,19.97,P,29,1<br>34.50,9.47,23.77,A,46,11                             |
| HSP90AA1 | MOL001525 | Daucosterol           | 116.552       | 31.90,9.07,26.37,A,65,23<br>32.70,13.88,23.37,A,43,2<br>29.70,10.47,24.37,A,52,4                             |
| HSP90AA1 | MOL001645 | Linoleyl acetate      | 108.399       | 31.90,7.47,28.37,A,81,10<br>36.70,7.08,18.77,P,26,21<br>33.70,7.88,30.77,A,87,16                             |
| HSP90AA1 | MOL001771 | eriferast-5-en-3beta- | 110.523       | 29.30,10.47,25.97,A,62,2<br>7<br>30.10,11.68,22.97,A,37,7                                                    |
| HSP90AA1 | MOL001792 | DFV                   | 95.2832       | 32.50,12.88,22.57,A,33,1<br>0<br>30.90,8.68,27.57,A,74,11                                                    |
| HSP90AA1 | MOL002268 | Rhein                 | 104.388       | 30.50,12.68,21.37,A,25,1<br>7<br>29.70,10.47,24.37,A,52,1                                                    |
| HSP90AA1 | MOL002714 | baicalein             | 102.138       | 1<br>34.90,7.67,26.77,P,59,14<br>34.10,13.07,24.57,A,55,5                                                    |
| HSP90AA1 | MOL002879 | Diop                  | 106.158       | 35.90,6.88,17.97,A,13,17<br>31.50,7.28,27.17,A,68,23<br>30.10,11.68,22.97,A,37,1                             |
| HSP90AA1 | MOL002959 | 3'-Methoxydaidzein    | 88.2484       | 3<br>32.10,12.88,21.17,A,23,1<br>32.90,10.68,23.57,A,44,9                                                    |
| HSP90AA1 | MOL003044 | Chryseriol            | 94.8724       | 27.90,14.07,21.57,P,41,14<br>30.90,8.68,27.57,A,74,18<br>29.10,9.68,27.57,A,75,9                             |
| HSP90AA1 | MOL003542 | sopentenyl-kaempfe    | 110.251       | 31.30,11.07,23.97,A,48,2<br>3                                                                                |

|          |           |                      |         |                                                                                      |
|----------|-----------|----------------------|---------|--------------------------------------------------------------------------------------|
| HSP90AA1 | MOL003648 | Inermin              | 99.9131 | 31.10,12.68,22.77,A,35,9<br>34.10,10.88,24.37,A,53,1<br>1<br>36.30,7.47,20.37,P,31,6 |
| HSP90AA1 | MOL004367 | olivil               | 115.446 | 29.70,10.47,24.37,A,52,1<br>9<br>29.50,8.47,27.97,P,68,3                             |
| HSP90AA1 | MOL004373 | Anhydroicaritin      | 111.579 | 32.90,10.68,23.57,A,44,1<br>9<br>34.10,13.07,24.57,A,55,9                            |
| HSP90AA1 | MOL004380 | 5-didehydro-3,15,16  | 96.8498 | 32.50,12.88,22.57,A,33,1<br>2<br>35.10,12.07,23.57,A,45,1                            |
| HSP90AA1 | MOL004382 | Yinyanghuo A         | 114.763 | 5<br>34.50,9.47,23.77,A,46,16<br>30.50,13.47,20.57,A,18,2                            |
| HSP90AA1 | MOL004384 | Yinyanghuo C         | 111.088 | 32.90,10.68,23.57,A,44,1<br>0<br>31.30,11.07,23.97,A,48,2                            |
| HSP90AA1 | MOL004386 | Yinyanghuo E         | 98.7187 | 34.30,7.47,29.37,A,83,12<br>29.10,11.07,24.97,P,57,2<br>32.50,11.28,24.97,A,57,1     |
| HSP90AA1 | MOL004388 | dioxo-2,3,4,8-tetra  | 98.7759 | 7<br>32.30,7.47,22.57,P,47,20<br>29.70,10.47,24.37,A,52,2                            |
| HSP90AA1 | MOL004391 | but-2-enyl)-2-pheny  | 108.492 | 30.50,13.47,20.57,A,18,1<br>5<br>34.10,13.07,24.57,A,55,3                            |
| HSP90AA1 | MOL004394 | aritin-3-O-alpha-L-r | 127.179 | 7<br>30.90,8.68,27.57,A,74,43<br>31.10,12.68,22.77,A,35,3                            |
| HSP90AA1 | MOL004396 | 3-methoxyphenyl      | 105.835 | 35.10,12.07,23.57,A,45,1<br>0<br>32.30,7.47,22.57,P,47,11                            |
| HSP90AA1 | MOL004425 | Icariin              | 96.8833 | 34.30,7.47,29.37,A,83,28<br>33.70,11.68,22.57,A,32,4<br>30.10,10.07,27.17,A,69,1     |
| HSP90AA1 | MOL004427 | Icariside A7         | 98.9879 | 7<br>32.90,7.28,29.97,A,84,18<br>35.50,9.68,22.37,A,30,5                             |
| HSP90AA1 | MOL004941 | -2-(4-hydroxyphenyl  | 98.5393 | 32.90,9.68,25.17,A,59,9<br>29.10,12.88,22.17,P,45,1<br>29.30,14.28,19.97,A,15,1      |
| HSP90AA1 | MOL005308 | Aposiopolamine       | 81.2921 | 30.50,12.68,21.37,A,25,3<br>31.90,9.07,26.37,A,65,14<br>32.90,10.68,23.57,A,44,1     |
| HSP90AA1 | MOL005317 | Deoxyharringtonine   | 126.727 | 32.90,7.28,29.97,A,84,15<br>36.70,9.47,20.57,P,35,28<br>29.30,10.47,25.97,A,62,1     |
| HSP90AA1 | MOL005318 | Dianthramine         | 81.9319 | 1<br>31.90,9.07,26.37,A,65,14<br>34.30,7.47,29.37,A,83,5                             |
| HSP90AA1 | MOL005320 | arachidonate         | 105.908 | 29.70,10.47,24.37,A,52,7<br>35.30,10.88,23.17,A,40,1<br>30.90,8.68,27.57,A,74,6      |
| HSP90AA1 | MOL005321 | Frutinone A          | 95.0267 | 32.90,10.68,23.57,A,44,1<br>4<br>32.30,5.67,30.17,A,85,30                            |
| HSP90AA1 | MOL005348 | Ginsenoside-Rh4_q1   | 118.225 | 32.70,13.88,23.37,A,43,3<br>2<br>29.30,14.28,19.97,A,15,2                            |
| HSP90AA1 | MOL005356 | Girinimbin           | 96.8052 | 31.10,10.28,25.57,A,61,1<br>4                                                        |



|          |           |                          |         |                                                                                                              |
|----------|-----------|--------------------------|---------|--------------------------------------------------------------------------------------------------------------|
| HSP90AA1 | MOL005376 | Panaxadiol               | 104.473 | 31.30,8.88,24.57,A,54,18<br>32.90,10.68,23.57,A,44,2<br>1                                                    |
| HSP90AA1 | MOL005384 | suchilactone             | 115.368 | 32.30,5.67,30.17,A,85,8<br>29.50,8.47,27.97,P,68,15<br>32.50,12.28,23.97,A,49,2<br>31.90,9.07,26.37,A,65,12  |
| HSP90AA1 | MOL005399 | alexandrin_qt            | 114.873 | 32.50,12.28,23.97,A,49,1<br>9                                                                                |
| HSP90AA1 | MOL006331 | '5-Dihydroxyflavon       | 89.037  | 31.90,7.47,28.37,A,81,2<br>30.10,11.68,22.97,A,37,1<br>3                                                     |
| HSP90AA1 | MOL008647 | Trans-Feruloyltyram      | 108.528 | 29.10,12.88,22.17,P,45,2<br>34.10,10.88,24.37,A,53,6<br>34.50,9.47,23.77,A,46,7<br>31.50,7.28,27.17,A,68,23  |
| HSP90AA1 | MOL009763 | garesinol-O-beta-D-      | 139.073 | 30.50,12.68,21.37,A,25,3<br>7                                                                                |
| AKT1     | MOL000098 | quercetin                | 73.3052 | 10.96,-3.11,14.09,P,1,17<br>11.36,0.89,16.29,P,10,18<br>8.36,-2.91,24.49,P,46,21<br>6.56,-6.71,19.69,P,21,10 |
| AKT1     | MOL000006 | luteolin                 | 93.3177 | 13.56,-3.31,17.09,P,12,20<br>12.16,-1.31,15.89,P,7,21<br>3.96,1.89,15.89,A,7,17                              |
| AKT1     | MOL000358 | beta-sitosterol          | 100.431 | 1.16,3.09,16.29,A,12,21<br>11.56,-<br>6.76,4.89,16.69,A,17,11                                                |
| AKT1     | MOL000359 | sitosterol               | 110.739 | 4.16,3.69,15.89,A,8,14<br>-0.64,3.49,16.89,A,22,19<br>8.76,-9.11,18.09,A,27,14                               |
| AKT1     | MOL000422 | kaempferol               | 76.4154 | 10.56,-8.11,16.89,A,20,16<br>8.36,-2.91,24.49,P,46,19<br>10.36,-8.51,18.49,A,28,4                            |
| AKT1     | MOL000449 | Stigmasterol             | 102.405 | 7.96,5.29,17.89,A,26,20<br>11.56,-<br>9.16,-7.91,16.69,A,15,6                                                |
| AKT1     | MOL000622 | Magnograndiolide         | 80.2729 | 9.36,-8.91,21.09,A,34,9<br>11.56,-<br>10.36,-8.51,18.49,A,28,3                                               |
| AKT1     | MOL001510 | 24-epicampesterol        | 107.692 | 9.36,6.89,19.09,A,29,26<br>7.96,5.29,17.89,A,26,29<br>10.96,8.09,20.89,A,33,24                               |
| AKT1     | MOL001525 | Daucosterol              | 70.3039 | 10.36,9.09,23.69,A,39,29<br>7.56,8.89,20.49,A,32,30<br>4.96,-6.31,24.09,A,40,2                               |
| AKT1     | MOL001645 | Linoleyl acetate         | 121.946 | 5.56,-4.91,24.09,A,41,3<br>10.56,-<br>10.56,-8.11,16.89,A,20,26                                              |
| AKT1     | MOL001771 | poriferast-5-en-3beta-ol | 111.7   | 9.36,-8.91,21.09,A,34,29<br>8.76,-9.11,18.09,A,27,30<br>8.76,-9.11,18.09,A,27,14                             |
| AKT1     | MOL001792 | DFV                      | 83.8764 | 6.56,-9.51,17.89,P,17,18<br>10.96,-3.11,14.09,P,1,19<br>11.96,1.29,31.29,A,52,12                             |
| AKT1     | MOL002268 | Rhein                    | 74.2905 | 9.36,9.49,31.49,A,54,17<br>9.16,4.49,31.09,P,65,20<br>8.36,-2.91,24.49,P,46,14                               |
| AKT1     | MOL002714 | baicalein                | 82.5208 | 10.56,-8.11,16.89,A,20,18<br>8.76,-9.11,18.09,A,27,19<br>10.56,-8.11,16.89,A,20,4                            |
| AKT1     | MOL002879 | Diop                     | 117.546 | 6.36,-6.11,23.29,A,37,16<br>3.76,-7.11,24.69,A,43,19                                                         |

|      |           |                                                                                                                                                                  |         |                                                                                                               |
|------|-----------|------------------------------------------------------------------------------------------------------------------------------------------------------------------|---------|---------------------------------------------------------------------------------------------------------------|
| AKT1 | MOL002959 | 3'-<br>Methoxydaidzein                                                                                                                                           | 96.398  | 10.36,-8.51,18.49,A,28,5<br>10.76,-2.11,15.69,A,4,16<br>8.36,-9.91,21.29,P,29,21<br>8.36,-2.91,24.49,P,46,14  |
| AKT1 | MOL003044 | Chryseriol                                                                                                                                                       | 102.011 | 11.56,-3.91,16.69,A,16,16<br>10.36,-<br>11.56,-0.71,16.29,A,11,20                                             |
| AKT1 | MOL003542 | 8-Isopentenyl-<br>kaempferol                                                                                                                                     | 112.732 | 7.96,-8.91,16.69,A,14,25<br>10.56,-<br>6.56,-6.71,19.69,P,21,14                                               |
| AKT1 | MOL003648 | Inermin                                                                                                                                                          | 83.9107 | 8.76,-9.11,18.09,A,27,20<br>5.96,-9.31,15.69,P,6,21<br>6.76,1.89,21.09,P,28,3                                 |
| AKT1 | MOL004367 | olivil                                                                                                                                                           | 114.89  | 6.76,4.89,16.69,A,17,24<br>4.96,0.49,16.49,A,13,27<br>9.36,6.89,19.09,A,29,17                                 |
| AKT1 | MOL004373 | Anhydroicaritin                                                                                                                                                  | 107.294 | 11.56,-0.71,16.29,A,11,21<br>6.76,4.89,16.69,A,17,22<br>9.36,6.89,19.09,A,29,20                               |
| AKT1 | MOL004380 | C-<br>Homoerythrinan,<br>1,6-didehydro-                                                                                                                          | 74.0408 | 6.76,4.89,16.69,A,17,22<br>12.16,0.09,15.49,P,5,23<br>11.36,0.89,16.29,P,10,3                                 |
| AKT1 | MOL004382 | Yinyanghuo A                                                                                                                                                     | 126.649 | 10.76,-2.11,15.69,A,4,26<br>9.36,-8.91,21.09,A,34,31<br>9.36,-8.91,21.09,A,34,12                              |
| AKT1 | MOL004384 | Yinyanghuo C                                                                                                                                                     | 89.0822 | 7.96,-10.11,18.09,P,18,17<br>9.16,-7.91,16.69,A,15,18<br>10.36,-8.51,18.49,A,28,3                             |
| AKT1 | MOL004386 | Yinyanghuo E                                                                                                                                                     | 90.6348 | 6.56,-9.51,17.89,P,17,20<br>8.36,-2.91,24.49,P,46,22                                                          |
| AKT1 | MOL004388 | 6-hydroxy-11,12-<br>dimethoxy-2,2-<br>dimethyl-1,8-<br>dioxo-2,3,4,8-<br>tetrahydro-1H-<br>isochromenol[3,4-<br>8-(3-methylbut-2-<br>enyl)-2-phenyl-<br>chromone | 104.543 | 7.96,-8.91,16.69,A,14,9<br>9.16,-7.91,16.69,A,15,10<br>4.96,-6.31,24.09,A,40,26                               |
| AKT1 | MOL004391 | Anhydroicaritin-3-<br>O-alpha-L-<br>rhamnoside                                                                                                                   | 114.977 | 10.36,-8.51,18.49,A,28,6<br>11.56,-0.71,16.29,A,11,14<br>6.36,-6.11,23.29,A,37,21<br>10.76,-2.11,15.69,A,4,37 |
| AKT1 | MOL004394 | 1,2-bis(4-hydroxy-<br>3-<br>methoxyphenyl)pr                                                                                                                     | 111.26  | 10.36,-<br>8.51,18.49,A,28,44<br>9.36,-8.91,21.09,A,34,3                                                      |
| AKT1 | MOL004396 | 3-<br>methoxyphenyl)pr                                                                                                                                           | 116.422 | 6.56,-6.71,19.69,P,21,4<br>8.76,-9.11,18.09,A,27,20<br>9.36,-8.91,21.09,A,34,29                               |
| AKT1 | MOL004427 | Icariside A7                                                                                                                                                     | 71.7345 | 8.36,-9.91,21.29,P,29,31<br>6.56,-6.71,19.69,P,21,32<br>9.36,-8.91,21.09,A,34,8                               |
| AKT1 | MOL004941 | (2R)-7-hydroxy-2-<br>(4-<br>hydroxyphenyl)chr                                                                                                                    | 89.8111 | 9.16,-7.91,16.69,A,15,13<br>7.16,-3.51,23.29,P,39,19<br>9.76,-9.51,16.89,A,19,12                              |
| AKT1 | MOL005308 | Aposiopolamine                                                                                                                                                   | 93.9236 | 9.36,-10.71,17.69,P,15,18<br>6.56,-6.71,19.69,P,21,19<br>6.36,-6.11,23.29,A,37,5                              |
| AKT1 | MOL005317 | Deoxyharringtonin<br>e                                                                                                                                           | 128.694 | 8.76,-9.11,18.09,A,27,27<br>11.56,-<br>8.76,-9.11,18.09,A,27,3                                                |
| AKT1 | MOL005318 | Dianthramine                                                                                                                                                     | 75.3423 | 6.56,-6.71,19.69,P,21,7<br>13.56,-3.31,17.09,P,12,21<br>9.56,8.69,20.29,A,31,5                                |
| AKT1 | MOL005320 | arachidonate                                                                                                                                                     | 125.156 | 10.76,-2.11,15.69,A,4,15<br>10.56,-                                                                           |

|       |           |                                       |         |                                                                                                                                            |
|-------|-----------|---------------------------------------|---------|--------------------------------------------------------------------------------------------------------------------------------------------|
| AKT1  | MOL005321 | Frutinone A                           | 90.1252 | 5.16,5.09,15.89,A,10,6<br>4.16,-1.11,17.09,A,23,15<br>1.56,-2.11,17.49,A,25,18<br>11.56,-3.91,16.69,A,16,8                                 |
| AKT1  | MOL005384 | suchilactone                          | 115.72  | 10.56,-8.11,16.89,A,20,16<br>5.56,-4.91,24.09,A,41,27<br>10.76,-2.11,15.69,A,4,14                                                          |
| AKT1  | MOL005399 | alexandrin_qt                         | 92.1736 | 8.76,-9.11,18.09,A,27,28<br>9.36,-8.91,21.09,A,34,30<br>10.36,-                                                                            |
| AKT1  | MOL006331 | 4',5-Dihydroxyflavone                 | 90.1262 | 8.51,18.49,A,28,16<br>9.36,-10.71,17.69,P,15,17<br>4.76,-6.71,23.69,P,41,2                                                                 |
| AKT1  | MOL008647 | N-Trans-Feruloyltyramine              | 119.141 | 9.36,-8.91,21.09,A,34,6<br>10.76,-2.11,15.69,A,4,22<br>6.56,-6.71,19.69,P,21,10                                                            |
| AKT1  | MOL009763 | (+)-Syringaresinol-O-beta-D-glucoside | 132.741 | 9.76,-9.51,16.89,A,19,37<br>9.36,6.89,19.09,A,29,41<br>-5.80,11.92,36.74,A,41,13                                                           |
| MAPK1 | MOL000098 | quercetin                             | 87.7245 | -7.40,12.32,34.94,P,17,19<br>-2.80,12.72,38.94,P,60,20<br>-4.40,12.32,36.54,P,39,10                                                        |
| MAPK1 | MOL000006 | luteolin                              | 91.7385 | -9.60,15.32,38.94,P,63,14<br>-                                                                                                             |
| MAPK1 | MOL000358 | beta-sitosterol                       | 85.1202 | -2.40,13.12,39.74,A,80,4<br>-5.80,11.92,36.74,A,41,18<br>-                                                                                 |
| MAPK1 | MOL000359 | sitosterol                            | 75.0828 | -1.60,14.12,41.54,A,92,11<br>-                                                                                                             |
| MAPK1 | MOL000422 | kaempferol                            | 81.7641 | 2.60,15.92,38.34,A,66,23<br>-5.80,11.92,36.74,A,41,16<br>-7.40,12.32,34.94,P,17,18<br>-2.80,12.72,38.94,P,60,21<br>-                       |
| MAPK1 | MOL000449 | Stigmasterol                          | 92.7545 | 7.40,14.32,35.74,A,29,18<br>-7.00,10.52,32.94,A,1,20<br>-8.00,15.32,37.34,A,53,9                                                           |
| MAPK1 | MOL000622 | Magnograndiolide                      | 66.3205 | -<br>5.60,12.12,35.34,A,18,16<br>-2.40,14.12,40.14,A,88,7                                                                                  |
| MAPK1 | MOL000787 | Fumarine                              | 91.3679 | -<br>3.20,14.12,36.14,A,33,18<br>-7.00,13.12,35.54,A,22,3                                                                                  |
| MAPK1 | MOL001510 | 24-epicampesterol                     | 94.1591 | -4.40,12.32,36.74,A,42,6<br>-                                                                                                              |
| MAPK1 | MOL001645 | Linoleyl acetate                      | 118.306 | -9.20,14.72,37.74,P,46,11<br>-                                                                                                             |
| MAPK1 | MOL001771 | poriferast-5-en-3beta-ol              | 92.8462 | 2.40,14.12,40.14,A,88,13<br>-6.00,10.92,34.74,A,11,1<br>-7.80,13.52,37.34,A,51,7<br>-                                                      |
| MAPK1 | MOL001792 | DFV                                   | 105.191 | -5.00,12.72,38.34,P,52,6<br>-                                                                                                              |
| MAPK1 | MOL002268 | Rhein                                 | 83.9238 | 7.40,14.32,35.74,A,29,10<br>-6.00,13.32,36.94,A,46,8<br>-7.40,12.32,34.94,P,17,18<br>-9.20,15.72,39.94,P,76,20<br>-4.60,13.72,38.54,A,69,8 |
| MAPK1 | MOL002268 | Rhein                                 | 78.9808 | -4.40,12.32,36.54,P,39,18<br>-9.60,15.32,38.94,P,63,20<br>-4.40,12.32,36.54,P,39,12                                                        |
| MAPK1 | MOL002714 | baicalein                             | 86.2509 | -9.60,15.32,38.94,P,63,14<br>-                                                                                                             |

|       |           |                                                                                                                                  |         |                                                                                   |
|-------|-----------|----------------------------------------------------------------------------------------------------------------------------------|---------|-----------------------------------------------------------------------------------|
| MAPK1 | MOL002879 | Diop                                                                                                                             | 81.6015 | 3.00,13.52,38.94,A,73,21                                                          |
| MAPK1 | MOL002959 | 3'-Methoxydaidzein                                                                                                               | 97.0345 | 3.00,13.52,38.94,A,73,17                                                          |
| MAPK1 | MOL003044 | Chryseriol                                                                                                                       | 96.6791 | -2.40,14.12,40.14,A,88,9                                                          |
| MAPK1 | MOL003542 | 8-Isopentenyl-kaempferol                                                                                                         | 101.745 | 4.40,12.32,36.74,A,42,18<br>-2.80,12.72,38.94,P,60,3<br>-7.40,12.32,34.94,P,17,19 |
| MAPK1 | MOL003648 | Inermin                                                                                                                          | 93.7842 | -7.20,13.92,38.54,P,56,14                                                         |
| MAPK1 | MOL004367 | olivil                                                                                                                           | 114.812 | 7.20,12.52,36.74,A,43,17                                                          |
| MAPK1 | MOL004373 | Anhydroicaritin                                                                                                                  | 108.018 | 5.00,13.92,37.34,A,52,21<br>-2.80,12.72,38.94,P,60,1<br>-7.40,12.32,34.94,P,17,6  |
| MAPK1 | MOL004380 | C-Homoerythrinan, 1,6-didehydro-                                                                                                 | 79.6425 | 1.80,13.32,40.74,A,90,12                                                          |
| MAPK1 | MOL004382 | Yinyanghuo A                                                                                                                     | 101.006 | -8.60,13.92,38.54,P,55,4<br>-6.20,10.72,33.34,P,2,6                               |
| MAPK1 | MOL004384 | Yinyanghuo C                                                                                                                     | 98.3525 | -5.60,12.12,35.34,A,18,3                                                          |
| MAPK1 | MOL004386 | Yinyanghuo E                                                                                                                     | 69.6435 | 3.00,14.92,38.74,A,71,12                                                          |
| MAPK1 | MOL004388 | 6-hydroxy-11,12-dimethoxy-2,2-dimethyl-1,8-dioxo-2,3,4,8-tetrahydro-1H-isochromenol[3,4-8-(3-methylbut-2-enyl)-2-phenyl-chromone | 69.0006 | 3.00,13.52,38.94,A,73,18<br>-2.40,12.92,42.54,P,93,25<br>-4.40,12.32,36.74,A,42,6 |
| MAPK1 | MOL004391 | 1,2-bis(4-hydroxy-3-methoxyphenyl)pr                                                                                             | 99.8411 | 7.60,14.32,38.34,A,65,18<br>-5.80,11.92,36.74,A,41,3                              |
| MAPK1 | MOL004396 | (2R)-7-hydroxy-2-(4-hydroxyphenyl)chr                                                                                            | 117.168 | 9.20,16.72,35.54,A,25,13<br>-6.00,12.32,38.34,A,63,9                              |
| MAPK1 | MOL004941 | Aposiopolamine                                                                                                                   | 104.549 | 8.80,14.92,38.14,A,62,13<br>-2.60,18.12,36.54,A,39,5                              |
| MAPK1 | MOL005308 | Deoxyharringtonine                                                                                                               | 81.6376 | -3.40,12.72,37.74,A,58,11<br>-7.20,13.92,38.54,P,56,26                            |
| MAPK1 | MOL005317 | Dianthramine                                                                                                                     | 87.1261 | 7.80,13.52,37.34,A,51,27<br>-4.60,13.72,38.54,A,69,6                              |
| MAPK1 | MOL005318 | arachidonate                                                                                                                     | 88.8599 | -2.00,11.52,41.74,P,87,15<br>-2.20,15.72,34.94,P,19,19                            |
| MAPK1 | MOL005320 | Frutinone A                                                                                                                      | 118.296 | 2.60,15.92,38.34,A,66,12<br>-2.40,13.12,39.74,A,80,3                              |
| MAPK1 | MOL005321 |                                                                                                                                  | 90.404  | 7.60,14.32,38.34,A,65,14                                                          |

|       |           |                          |         |                                                                                                                    |
|-------|-----------|--------------------------|---------|--------------------------------------------------------------------------------------------------------------------|
| MAPK1 | MOL005356 | Girinimbin               | 89.4855 | -7.00,13.12,35.54,A,22,3<br>-8.00,15.32,37.34,A,53,6<br>-                                                          |
| MAPK1 | MOL005384 | suchilactone             | 103.385 | -7.60,14.32,36.74,A,44,7<br>-4.80,12.12,38.14,A,61,11<br>-3.00,14.32,35.94,P,30,15<br>-                            |
| MAPK1 | MOL005399 | alexandrin_qt            | 88.591  | 1.80,16.52,36.34,A,38,23<br>-7.00,11.72,35.54,A,21,28<br>-7.80,13.52,37.34,A,51,1<br>-3.00,13.52,38.94,A,73,8<br>- |
| MAPK1 | MOL006331 | 4',5-Dihydroxyflavone    | 86.9838 | -0.80,13.52,40.14,P,79,3<br>-7.40,12.32,34.94,P,17,4<br>-                                                          |
| MAPK1 | MOL008647 | N-Trans-Feruloyltyramine | 108.091 | -                                                                                                                  |
| JUN   | MOL000098 | quercetin                | 92.5499 | 13.17,0.76,14.86,A,91,6<br>6.57,1.56,12.06,A,73,13<br>9.97,-0.04,10.66,P,65,20<br>10.97,5.36,10.86,A,70,11         |
| JUN   | MOL000006 | luteolin                 | 95.8399 | 12.17,4.76,8.86,P,52,14<br>10.17,-3.84,11.06,P,68,20<br>6.17,-0.04,15.86,A,93,4                                    |
| JUN   | MOL000358 | beta-sitosterol          | 94.6901 | 2.97,1.36,13.06,A,84,12<br>13.17,0.76,14.86,A,91,30<br>12.57,4.76,9.06,A,61,19                                     |
| JUN   | MOL000359 | sitosterol               | 107.771 | 2.97,1.36,13.06,A,84,27<br>12.57,5.76,12.06,A,74,28<br>13.17,0.76,14.86,A,91,7                                     |
| JUN   | MOL000422 | kaempferol               | 88.2745 | 6.57,1.56,12.06,A,73,16<br>9.97,-0.04,10.66,P,65,21<br>12.17,7.36,16.06,A,95,15                                    |
| JUN   | MOL000449 | Stigmasterol             | 39.1558 | 11.37,6.56,12.26,A,77,20<br>13.17,8.36,19.06,A,100,2<br>2.97,1.36,13.06,A,84,14                                    |
| JUN   | MOL001510 | 24-epicampesterol        | 119.337 | 6.17,-0.04,15.86,A,93,15<br>10.97,5.36,10.86,A,70,26<br>8.17,-9.64,0.86,A,6,1                                      |
| JUN   | MOL001645 | Linoleyl acetate         | 135.724 | 6.17,-14.44,4.66,A,33,9<br>2.77,-14.04,6.46,A,43,14<br>12.17,7.36,16.06,A,95,23                                    |
| JUN   | MOL001771 | poriferast-5-en-3beta-ol | 85.025  | 13.17,8.36,19.06,A,100,2<br>7<br>8.77,-5.64,12.26,A,76,9                                                           |
| JUN   | MOL001792 | DFV                      | 106.59  | 14.77,-<br>0.04,14.86,A,90,14<br>11.37,6.56,12.26,A,77,11                                                          |
| JUN   | MOL002268 | Rhein                    | 123.495 | 12.77,5.56,10.46,A,65,13<br>7.97,0.96,10.66,P,66,15<br>9.97,-0.04,10.66,P,65,10                                    |
| JUN   | MOL002714 | baicalein                | 90.0553 | 11.57,6.16,14.06,A,88,16<br>12.17,7.36,16.06,A,95,20<br>11.97,6.76,10.66,A,68,4                                    |
| JUN   | MOL002879 | Diop                     | 132.918 | 13.17,8.36,19.06,A,100,1<br>6                                                                                      |
| JUN   | MOL002959 | 3'-Methoxydaidzein       | 100.269 | 4.37,-16.04,3.86,A,26,6<br>6.17,-14.44,4.66,A,33,8<br>11.37,-<br>7.57,5.56,13.86,P,87,14                           |
| JUN   | MOL003044 | Chryseriol               | 90.3244 | 13.17,0.76,14.86,A,91,15<br>14.17,-<br>7.57,5.56,13.86,P,87,11                                                     |
| JUN   | MOL003542 | 8-Isopentenyl-kaempferol | 105.751 | 13.17,0.76,14.86,A,91,16<br>14.17,-                                                                                |

|     |           |                                                                                                                                                                  |         |                                                                                                              |
|-----|-----------|------------------------------------------------------------------------------------------------------------------------------------------------------------------|---------|--------------------------------------------------------------------------------------------------------------|
| JUN | MOL003648 | Inermin                                                                                                                                                          | 81.1743 | 4.37,-13.84,5.86,A,39,4<br>3.57,-14.04,4.66,P,25,5<br>1.17,-13.44,7.26,A,52,9<br>11.57,7.96,10.46,P,63,7     |
| JUN | MOL004367 | olivil                                                                                                                                                           | 121.577 | 6.17,-0.04,15.86,A,93,26<br>11.57,6.16,14.06,A,88,27<br>14.77,-                                              |
| JUN | MOL004373 | Anhydroicaritin                                                                                                                                                  | 100.178 | 0.04,14.86,A,90,21<br>11.57,6.16,14.06,A,88,22<br>11.57,6.16,14.06,A,88,18                                   |
| JUN | MOL004380 | C-<br>Homoerythrinan,<br>1,6-didehydro-                                                                                                                          | 100.937 | 14.17,-<br>1.64,13.46,A,86,20<br>13.37,4.36,8.26,P,50,4                                                      |
| JUN | MOL004382 | Yinyanghuo A                                                                                                                                                     | 128.981 | 9.77,-4.44,12.66,A,81,19<br>11.37,6.56,12.26,A,77,29                                                         |
| JUN | MOL004388 | 6-hydroxy-11,12-<br>dimethoxy-2,2-<br>dimethyl-1,8-<br>dioxo-2,3,4,8-<br>tetrahydro-1H-<br>isochromenol[3,4-<br>8-(3-methylbut-2-<br>enyl)-2-phenyl-<br>chromone | 104.709 | 12.57,5.76,12.06,A,74,18<br>12.17,7.36,16.06,A,95,26<br>9.97,-0.04,10.66,P,65,27<br>11.37,6.56,12.26,A,77,14 |
| JUN | MOL004391 | Anhydroicaritin-3-<br>O-alpha-L-<br>rhamnoside                                                                                                                   | 107.802 | 12.77,5.56,10.46,A,65,16<br>14.17,-<br>17.37,-9.84,7.26,A,53,32                                              |
| JUN | MOL004394 | 1,2-bis(4-hydroxy-<br>3-<br>methoxyphenyl)pr                                                                                                                     | 110.697 | 15.37,-<br>10.44,10.26,A,64,37<br>13.17,0.76,14.86,A,91,7                                                    |
| JUN | MOL004396 |                                                                                                                                                                  | 109.209 | 14.17,-<br>1.64,13.46,A,86,10<br>2.97,10.96,6.66,P,36,13                                                     |
| JUN | MOL004425 | Icariin                                                                                                                                                          | 127.031 | 4.17,6.76,5.26,P,28,36<br>6.17,5.96,3.46,P,12,43<br>5.57,11.76,11.86,A,72,26                                 |
| JUN | MOL004427 | Icariside A7                                                                                                                                                     | 35.9047 | 5.37,10.96,9.66,P,61,30<br>6.77,15.36,11.06,P,69,31<br>10.97,5.36,10.86,A,70,15                              |
| JUN | MOL004941 | (2R)-7-hydroxy-2-<br>(4-<br>hydroxyphenyl)chr                                                                                                                    | 79.0571 | 7.57,5.56,13.86,P,87,17<br>12.17,4.76,8.86,P,52,18<br>6.17,-0.04,15.86,A,93,1                                |
| JUN | MOL005308 | Aposiopolamine                                                                                                                                                   | 98.6936 | 11.57,6.16,14.06,A,88,12<br>12.57,5.76,12.06,A,74,15<br>16.17,-5.84,5.26,P,27,13                             |
| JUN | MOL005317 | Deoxyharringtonin<br>e                                                                                                                                           | 43.7426 | 17.17,-4.24,6.26,P,30,14<br>17.37,-10.04,6.66,P,33,21<br>9.37,-13.24,4.26,P,20,7                             |
| JUN | MOL005318 | Dianthramine                                                                                                                                                     | 90.0999 | 11.37,-17.84,3.46,A,21,14<br>5.97,-17.64,2.86,A,19,16<br>2.77,-14.04,6.46,A,43,9                             |
| JUN | MOL005320 | arachidonate                                                                                                                                                     | 137.942 | 5.97,-14.04,3.26,A,20,13<br>6.37,-7.04,0.46,A,2,20<br>7.57,-5.04,11.66,A,71,1                                |
| JUN | MOL005321 | Frutinone A                                                                                                                                                      | 99.1078 | 8.57,-5.24,14.06,A,87,3<br>10.77,-2.24,10.66,P,64,19<br>12.77,5.56,10.46,A,65,1                              |
| JUN | MOL005356 | Girinimbin                                                                                                                                                       | 102.82  | 11.37,6.56,12.26,A,77,3<br>6.17,-0.04,15.86,A,93,19<br>1.77,-1.24,9.26,A,63,1                                |
| JUN | MOL005384 | suchilactone                                                                                                                                                     | 130.681 | 2.97,1.36,13.06,A,84,8<br>12.77,5.56,10.46,A,65,27<br>6.57,1.56,12.06,A,73,18                                |
| JUN | MOL005399 | alexandrin_qt                                                                                                                                                    | 103.269 | 14.17,-<br>1.64,13.46,A,86,23                                                                                |

|      |           |                                       |         |                                                                                     |
|------|-----------|---------------------------------------|---------|-------------------------------------------------------------------------------------|
| JUN  | MOL006331 | 4',5-Dihydroxyflavone                 | 79.4552 | 8.77,-5.64,12.26,A,76,2<br>15.77,-<br>1.24,12.86,A,82,14<br>6.17,-14.44,4.66,A,33,7 |
| JUN  | MOL008647 | N-Trans-Feruloyltyramine              | 136.499 | 9.77,-11.84,2.06,A,17,11<br>2.77,-14.04,6.46,A,43,17<br>13.17,8.16,17.26,A,97,19    |
| JUN  | MOL009763 | (+)-Syringaresinol-O-beta-D-glucoside | 90.9099 | 11.57,6.16,14.06,A,88,25<br>11.97,6.76,10.66,A,68,40<br>22.84,22.69,4.16,A,32,2     |
| RELA | MOL000098 | quercetin                             | 64.4319 | 20.64,23.29,3.36,A,18,6<br>23.84,20.69,4.16,P,19,18<br>20.64,23.29,3.36,A,18,4      |
| RELA | MOL000006 | luteolin                              | 69.377  | 22.84,22.69,4.16,A,32,11<br>23.84,20.69,4.16,P,19,12<br>20.44,23.49,2.36,A,16,13    |
| RELA | MOL000358 | beta-sitosterol                       | 82.5069 | 22.84,20.49,3.76,A,23,21<br>23.84,21.89,5.36,P,30,25<br>24.84,20.29,3.56,A,20,2     |
| RELA | MOL000359 | sitosterol                            | 75.2792 | 23.64,22.29,4.36,A,38,4<br>21.44,22.69,3.56,A,21,6<br>22.44,21.89,3.76,A,24,13      |
| RELA | MOL000422 | kaempferol                            | 67.963  | 23.64,22.29,4.36,A,38,14<br>24.84,20.29,3.56,A,20,16<br>22.84,20.49,3.76,A,23,2     |
| RELA | MOL000449 | Stigmasterol                          | 77.6599 | 20.44,23.49,2.36,A,16,6<br>23.84,21.89,5.36,P,30,30<br>20.64,23.29,3.36,A,18,18     |
| RELA | MOL000787 | Fumarine                              | 69.0548 | 22.84,22.69,4.16,A,32,21<br>25.04,21.29,4.16,P,20,25<br>22.84,20.49,3.76,A,23,1     |
| RELA | MOL001510 | 24-epicampesterol                     | 81.4243 | 20.44,23.49,2.36,A,16,7<br>23.84,21.89,5.36,P,30,18<br>23.84,21.89,5.36,P,30,1      |
| RELA | MOL001525 | Daucosterol                           | 73.9129 | 20.44,23.49,2.36,A,16,17<br>22.84,20.49,3.76,A,23,20<br>20.64,23.29,3.36,A,18,5     |
| RELA | MOL001645 | Linoleyl acetate                      | 102.431 | 22.84,20.49,3.76,A,23,9<br>23.44,16.49,4.16,A,30,17<br>22.84,20.49,3.76,A,23,1      |
| RELA | MOL001771 | poriferast-5-en-3beta-ol              | 84.2977 | 20.44,23.49,2.36,A,16,7<br>23.84,21.89,5.36,P,30,15<br>22.84,22.69,4.16,A,32,14     |
| RELA | MOL001792 | DFV                                   | 64.9361 | 20.64,23.89,3.96,A,28,16<br>22.44,24.89,5.16,P,29,18<br>20.64,23.29,3.36,A,18,11    |
| RELA | MOL002268 | Rhein                                 | 66.6413 | 22.84,22.69,4.16,A,32,13<br>23.84,20.69,4.16,P,19,21<br>22.44,21.89,3.76,A,24,16    |
| RELA | MOL002714 | baicalein                             | 48.8625 | 23.64,22.29,4.36,A,38,18<br>24.84,20.29,3.56,A,20,19<br>24.04,16.49,6.36,A,51,4     |
| RELA | MOL002879 | Diop                                  | 95.3997 | 22.84,22.69,4.16,A,32,22<br>21.44,22.69,3.56,A,21,23<br>20.44,23.49,2.36,A,16,17    |
| RELA | MOL002959 | 3'-Methoxydaidzein                    | 70.9079 | 23.84,20.29,3.36,A,17,19<br>23.24,23.29,4.76,P,23,20<br>22.84,20.49,3.76,A,23,18    |
| RELA | MOL003044 | Chryseriol                            | 73.1797 | 24.44,20.49,5.56,P,32,21<br>24.04,16.49,6.36,A,51,22<br>22.44,21.89,3.76,A,24,9     |
| RELA | MOL003542 | 8-Isopentenyl-kaempferol              | 87.7906 | 24.04,17.89,4.36,A,34,23<br>24.04,16.49,6.36,A,51,25                                |

|      |           |                                                                                                                                                                                        |         |                                                                                                             |
|------|-----------|----------------------------------------------------------------------------------------------------------------------------------------------------------------------------------------|---------|-------------------------------------------------------------------------------------------------------------|
| RELA | MOL003648 | Inermin                                                                                                                                                                                | 64.7208 | 20.64,23.89,3.96,A,28,17<br>22.84,22.69,4.16,A,32,19<br>22.44,24.89,5.16,P,29,21<br>22.04,16.89,6.76,P,38,6 |
| RELA | MOL004367 | olivil                                                                                                                                                                                 | 96.8114 | 17.84,23.89,4.56,P,22,7<br>21.44,22.69,3.56,A,21,27<br>22.44,21.89,3.76,A,24,17                             |
| RELA | MOL004373 | Anhydroicaritin                                                                                                                                                                        | 99.1972 | 24.04,17.89,4.36,A,34,22<br>25.24,15.69,3.96,A,25,25<br>20.64,23.29,3.36,A,18,7                             |
| RELA | MOL004380 | C-<br>Homoerythrinan,<br>1,6-didehydro-                                                                                                                                                | 73.1193 | 19.44,23.49,4.36,A,39,8<br>24.84,20.29,3.56,A,20,20<br>21.44,22.69,3.56,A,21,19                             |
| RELA | MOL004382 | Yinyanghuo A                                                                                                                                                                           | 100.109 | 23.44,18.69,5.56,A,47,26<br>23.44,16.49,4.16,A,30,27<br>22.84,22.69,4.16,A,32,2                             |
| RELA | MOL004384 | Yinyanghuo C                                                                                                                                                                           | 79.3662 | 20.64,23.29,3.36,A,18,3<br>23.84,20.69,4.16,P,19,20<br>22.84,22.69,4.16,A,32,2                              |
| RELA | MOL004386 | Yinyanghuo E                                                                                                                                                                           | 79.4097 | 20.64,23.29,3.36,A,18,3<br>23.84,20.69,4.16,P,19,20                                                         |
| RELA | MOL004388 | 6-hydroxy-11,12-<br>dimethoxy-2,2-<br>dimethyl-1,8-<br>dioxo-2,3,4,8-<br>tetrahydro-1H-<br>isochromenol[3,4-<br>8-(3-methylbut-2-<br>enyl)-2-phenyl-<br>chromone<br>Anhydroicaritin-3- | 69.0877 | 23.24,17.89,4.76,A,41,2<br>20.44,23.49,2.36,A,16,10<br>23.84,21.89,5.36,P,30,27<br>23.84,20.69,4.16,P,19,4  |
| RELA | MOL004391 | enyl)-2-phenyl-<br>chromone<br>Anhydroicaritin-3-                                                                                                                                      | 87.8271 | 23.24,17.89,4.76,A,41,6<br>20.44,23.49,2.36,A,16,13<br>20.44,23.49,2.36,A,16,7                              |
| RELA | MOL004394 | O-alpha-L-<br>rhamnoside<br>1,2-bis(4-hydroxy-                                                                                                                                         | 99.9231 | 23.84,21.89,5.36,P,30,9<br>24.04,16.49,6.36,A,51,26<br>23.84,20.29,3.36,A,17,13                             |
| RELA | MOL004396 | 3-<br>methoxyphenyl)pr                                                                                                                                                                 | 99.6134 | 24.44,15.29,3.96,P,18,21<br>23.84,16.69,6.36,P,37,23<br>19.44,23.49,4.36,A,39,25                            |
| RELA | MOL004425 | Icariin                                                                                                                                                                                | 76.6092 | 20.84,24.49,-1.24,A,8,39<br>20.44,16.09,8.96,P,48,41<br>20.64,23.29,3.36,A,18,9                             |
| RELA | MOL004427 | Icariside A7                                                                                                                                                                           | 59.9056 | 22.84,22.69,4.16,A,32,14<br>23.24,17.89,4.76,A,41,21<br>22.84,22.69,4.16,A,32,13                            |
| RELA | MOL004941 | (2R)-7-hydroxy-2-<br>(4-<br>hydroxyphenyl)chr                                                                                                                                          | 59.3846 | 20.64,23.89,3.96,A,28,15<br>22.44,24.89,5.16,P,29,18<br>25.04,7.49,15.76,A,92,1                             |
| RELA | MOL005308 | Aposiopolamine                                                                                                                                                                         | 68.8183 | 22.64,7.29,15.36,A,89,3<br>20.64,9.09,14.76,P,86,19<br>25.44,16.69,4.16,A,31,1                              |
| RELA | MOL005317 | Deoxyharringtonin<br>e                                                                                                                                                                 | 93.3052 | 24.04,16.49,6.36,A,51,5<br>20.64,23.29,3.36,A,18,27<br>22.84,22.69,4.16,A,32,11                             |
| RELA | MOL005318 | Dianthramine                                                                                                                                                                           | 74.6061 | 19.24,23.89,4.16,P,21,15<br>25.04,21.29,4.16,P,20,21<br>20.64,23.29,3.36,A,18,14                            |
| RELA | MOL005320 | arachidonate                                                                                                                                                                           | 108.656 | 23.24,19.29,3.96,A,27,18<br>23.84,16.69,6.36,P,37,22<br>21.44,16.69,7.96,P,47,13                            |
| RELA | MOL005321 | Frutinone A                                                                                                                                                                            | 57.5379 | 23.24,17.89,4.76,A,41,15<br>24.84,17.49,6.36,A,52,17<br>22.44,21.89,3.76,A,24,19                            |
| RELA | MOL005348 | Ginsenoside-<br>Rh4_qt                                                                                                                                                                 | 60.6336 | 24.04,17.89,4.36,A,34,28<br>20.64,23.29,3.36,A,18,30                                                        |



|        |           |                                       |         |                                                                                                             |
|--------|-----------|---------------------------------------|---------|-------------------------------------------------------------------------------------------------------------|
| RELA   | MOL005356 | Girinimbin                            | 58.7796 | 20.64,16.09,7.76,P,45,7<br>24.84,17.49,6.36,A,52,15<br>25.44,16.69,4.16,A,31,20<br>20.64,23.29,3.36,A,18,11 |
| RELA   | MOL005384 | suchilactone                          | 92.9714 | 22.84,20.49,3.76,A,23,14<br>22.84,22.69,4.16,A,32,16<br>20.64,23.89,3.96,A,28,23                            |
| RELA   | MOL005399 | alexandrin_qt                         | 78.4925 | 24.84,20.29,3.56,A,20,27<br>23.24,17.89,4.76,A,41,28<br>22.84,22.69,4.16,A,32,2                             |
| RELA   | MOL006331 | 4',5-Dihydroxyflavone                 | 65.0419 | 20.64,23.29,3.36,A,18,6<br>23.84,20.69,4.16,P,19,18<br>22.44,24.89,5.16,P,29,2                              |
| RELA   | MOL008647 | N-Trans-Feruloyltyramine              | 93.4074 | 20.64,23.89,3.96,A,28,11<br>22.84,22.69,4.16,A,32,12<br>22.04,16.89,6.76,P,38,9                             |
| RELA   | MOL009763 | (+)-Syringaresinol-O-beta-D-glucoside | 114.972 | 24.84,16.29,4.96,P,25,10<br>22.84,20.49,3.76,A,23,37<br>5.73,10.76,-23.25,A,22,2                            |
| MAPK14 | MOL000098 | quercetin                             | 85.7335 | 2.53,12.56,-<br>17.45,A,59,12<br>2.33,13.76,-23.45,P,20,10                                                  |
| MAPK14 | MOL000006 | luteolin                              | 83.2868 | 5.73,10.76,-23.25,A,22,11<br>2.53,12.56,-<br>2.53,12.56,-17.45,A,59,6                                       |
| MAPK14 | MOL000358 | beta-sitosterol                       | 103.186 | 2.13,11.16,-21.05,A,40,17<br>4.73,11.76,-<br>2.53,12.56,-                                                   |
| MAPK14 | MOL000359 | sitosterol                            | 88.4406 | 17.45,A,59,10<br>5.93,8.56,-20.85,A,43,18<br>5.73,10.76,-23.25,A,22,9                                       |
| MAPK14 | MOL000422 | kaempferol                            | 87.842  | 2.33,13.76,-23.45,P,20,11<br>2.53,12.56,-<br>4.73,11.76,-22.25,A,32,2                                       |
| MAPK14 | MOL000449 | Stigmasterol                          | 102.413 | 2.53,12.56,-17.45,A,59,7<br>2.13,11.16,-<br>18.13,5.96,-20.85,A,41,6                                        |
| MAPK14 | MOL000622 | Magnograndiolide                      | 79.3968 | 17.93,4.36,-26.65,P,6,18<br>18.13,2.76,-<br>4.93,11.96,-18.05,A,54,14                                       |
| MAPK14 | MOL000787 | Fumarine                              | 75.2489 | 2.53,12.56,-<br>17.45,A,59,15<br>2.53,12.56,-                                                               |
| MAPK14 | MOL001510 | 24-epicampesterol                     | 88.3721 | 17.45,A,59,20<br>4.73,11.76,-22.25,A,32,21<br>2.53,12.56,-                                                  |
| MAPK14 | MOL001525 | Daucosterol                           | 98.5296 | 17.45,A,59,12<br>2.13,11.16,-21.05,A,40,18<br>8.93,13.96,-23.05,A,27,1                                      |
| MAPK14 | MOL001645 | Linoleyl acetate                      | 119.201 | 4.93,11.96,-18.05,A,54,7<br>8.53,7.16,-16.65,A,65,17<br>4.73,11.76,-22.25,A,32,1                            |
| MAPK14 | MOL001771 | poriferast-5-en-3beta-ol              | 97.3555 | 2.53,12.56,-17.45,A,59,8<br>2.13,11.16,-<br>4.73,11.76,-22.25,A,32,1                                        |
| MAPK14 | MOL001792 | DFV                                   | 94.8437 | 5.93,9.56,-19.45,A,45,7<br>4.93,11.96,-<br>4.73,11.76,-22.25,A,32,4                                         |
| MAPK14 | MOL002714 | baicalein                             | 90.3524 | 6.13,7.76,-19.25,A,46,17<br>7.13,7.16,-17.05,A,61,20<br>5.73,10.76,-23.25,A,22,4                            |
| MAPK14 | MOL002879 | Diop                                  | 106.394 | 6.13,7.76,-16.45,A,67,22<br>9.53,5.96,-16.65,A,64,25                                                        |

|        |           |                                                                                                                                                                  |         |                                                                                                  |
|--------|-----------|------------------------------------------------------------------------------------------------------------------------------------------------------------------|---------|--------------------------------------------------------------------------------------------------|
| MAPK14 | MOL002959 | 3'-<br>Methoxydaidzein                                                                                                                                           | 67.9102 | 2.53,12.56,-17.45,A,59,5<br>5.73,10.76,-<br>23.25,A,22,16<br>2.33,13.76,-23.45,P,20,10           |
| MAPK14 | MOL003044 | Chryseriol                                                                                                                                                       | 83.9557 | 5.73,10.76,-23.25,A,22,11<br>2.53,12.56,-<br>9.73,12.96,-22.65,P,28,19                           |
| MAPK14 | MOL003542 | 8-Isopentenyl-<br>kaempferol                                                                                                                                     | 98.3008 | 4.93,11.96,-18.05,A,54,25<br>2.53,12.56,-<br>4.73,11.76,-22.25,A,32,13                           |
| MAPK14 | MOL003648 | Inermin                                                                                                                                                          | 87.7178 | 5.93,9.56,-19.45,A,45,17<br>4.93,11.96,-<br>16.13,6.16,-25.45,P,9,3                              |
| MAPK14 | MOL004367 | olivil                                                                                                                                                           | 111.482 | 18.13,7.76,-21.25,A,38,11<br>14.93,1.76,-<br>9.33,5.96,-14.85,A,76,21                            |
| MAPK14 | MOL004373 | Anhydroicaritin                                                                                                                                                  | 91.0006 | 7.13,12.16,-<br>15.05,A,74,26<br>4.73,11.76,-22.25,A,32,13                                       |
| MAPK14 | MOL004380 | C-<br>Homoerythrinan,<br>1,6-didehydro-                                                                                                                          | 93.5422 | 8.93,13.96,-<br>23.05,A,27,22<br>16.93,3.96,-24.25,A,13,11                                       |
| MAPK14 | MOL004382 | Yinyanghuo A                                                                                                                                                     | 120.332 | 18.13,7.76,-<br>21.25,A,38,15<br>2.53,12.56,-                                                    |
| MAPK14 | MOL004384 | Yinyanghuo C                                                                                                                                                     | 86.1155 | 17.45,A,59,14<br>4.93,11.96,-18.05,A,54,18<br>2.53,12.56,-                                       |
| MAPK14 | MOL004386 | Yinyanghuo E                                                                                                                                                     | 89.1774 | 17.45,A,59,14<br>4.93,11.96,-18.05,A,54,18                                                       |
| MAPK14 | MOL004388 | 6-hydroxy-11,12-<br>dimethoxy-2,2-<br>dimethyl-1,8-<br>dioxo-2,3,4,8-<br>tetrahydro-1H-<br>isochromenol[3,4-<br>8-(3-methylbut-2-<br>enyl)-2-phenyl-<br>chromone | 27.8841 | 2.13,11.16,-21.05,A,40,9<br>2.33,13.76,-23.45,P,20,20<br>-0.07,13.76,-26.05,A,6,26               |
| MAPK14 | MOL004391 | 1,2-bis(4-hydroxy-<br>3-<br>methoxyphenyl)pr                                                                                                                     | 88.061  | 2.33,13.76,-23.45,P,20,4<br>5.73,10.76,-23.25,A,22,7<br>2.53,12.56,-<br>18.13,8.16,-20.85,P,35,5 |
| MAPK14 | MOL004396 | 3-<br>methoxyphenyl)pr                                                                                                                                           | 110.738 | 18.13,3.76,-25.85,A,8,19<br>14.93,1.76,-<br>2.53,12.56,-                                         |
| MAPK14 | MOL004427 | Icariside A7                                                                                                                                                     | 63.3909 | 17.45,A,59,17<br>5.93,10.56,-<br>18.13,1.16,-24.65,A,11,2                                        |
| MAPK14 | MOL004941 | (2R)-7-hydroxy-2-<br>(4-<br>hydroxyphenyl)chr                                                                                                                    | 89.9586 | 16.13,2.56,-24.05,A,14,5<br>18.13,7.76,-<br>6.53,11.96,-22.65,A,29,13                            |
| MAPK14 | MOL005308 | Aposiopolamine                                                                                                                                                   | 67.0051 | 5.73,10.76,-<br>23.25,A,22,16<br>-0.07,13.76,-26.05,A,6,5                                        |
| MAPK14 | MOL005317 | Deoxyharringtonin<br>e                                                                                                                                           | 97.0167 | 2.53,12.56,-<br>17.45,A,59,30<br>4.73,11.76,-22.25,A,32,14                                       |
| MAPK14 | MOL005318 | Dianthramine                                                                                                                                                     | 71.8003 | 5.73,10.56,-23.85,P,16,15<br>2.53,12.56,-<br>4.73,11.76,-22.25,A,32,12                           |
| MAPK14 | MOL005320 | arachidonate                                                                                                                                                     | 113.108 | 5.93,9.56,-19.45,A,45,15<br>7.13,7.16,-17.05,A,61,18<br>4.73,11.76,-22.25,A,32,14                |
| MAPK14 | MOL005321 | Frutinone A                                                                                                                                                      | 79.8533 | 4.93,11.96,-18.05,A,54,15<br>5.93,9.56,-19.45,A,45,18                                            |

|        |           |                                               |         |                                                                                       |
|--------|-----------|-----------------------------------------------|---------|---------------------------------------------------------------------------------------|
| MAPK14 | MOL005348 | Ginsenoside-<br>Rh4_qt                        | 87.4445 | 2.13,11.16,-21.05,A,40,16<br>9.73,12.76,-<br>23.05,A,26,29<br>7.33,6.56,-18.25,A,53,1 |
| MAPK14 | MOL005356 | Girinimbin                                    | 85.1249 | 6.13,7.76,-16.45,A,67,3<br>4.73,11.76,-<br>2.33,11.96,-10.25,A,99,1                   |
| MAPK14 | MOL005384 | suchilactone                                  | 93.2926 | 3.93,10.36,-<br>18.85,A,50,20<br>2.13,11.16,-21.05,A,40,10                            |
| MAPK14 | MOL005399 | alexandrin_qt                                 | 97.6333 | 5.93,8.56,-20.85,A,43,23<br>8.33,5.76,-17.45,A,58,29<br>5.73,10.76,-23.25,A,22,2      |
| MAPK14 | MOL006331 | 4',5-<br>Dihydroxyflavone                     | 74.2241 | 2.53,12.56,-<br>17.45,A,59,13<br>9.73,14.16,-23.25,P,22,2                             |
| MAPK14 | MOL008647 | N-Trans-<br>Feruloyltyramine                  | 105.504 | 5.93,8.36,-17.65,A,57,16<br>7.93,5.76,-15.85,A,69,22<br>1.93,10.56,-20.45,P,36,5      |
| MAPK14 | MOL009763 | (+)-Syringaresinol-<br>O-beta-D-<br>glucoside | 121.029 | 5.73,10.56,-23.85,P,16,9<br>1.33,12.76,-<br>6.25,13.26,-26.51,P,4,17                  |
| ESR1   | MOL000098 | quercetin                                     | 100.24  | 9.25,16.06,-24.11,P,21,18<br>8.65,16.26,-21.31,P,69,22<br>7.25,18.26,-22.11,P,54,10   |
| ESR1   | MOL000006 | luteolin                                      | 99.5107 | 8.05,15.46,-25.31,A,20,11<br>5.45,16.06,-<br>9.45,15.86,-                             |
| ESR1   | MOL000358 | beta-sitosterol                               | 110.448 | 22.51,A,56,19<br>7.65,18.26,-<br>9.45,15.86,-                                         |
| ESR1   | MOL000359 | sitosterol                                    | 114.996 | 22.51,A,56,20<br>4.65,13.46,-<br>8.45,17.86,-22.11,P,53,11                            |
| ESR1   | MOL000422 | kaempferol                                    | 99.0399 | 5.45,16.06,-18.11,A,97,17<br>5.25,14.66,-26.51,P,5,19<br>8.05,17.46,-25.51,A,16,1     |
| ESR1   | MOL000449 | Stigmasterol                                  | 98.4224 | 7.25,14.26,-23.31,A,44,6<br>4.85,15.86,-<br>6.85,14.66,-19.51,A,89,9                  |
| ESR1   | MOL000622 | Magnograndiolide                              | 95.0231 | 7.85,12.86,-21.11,A,73,15<br>6.25,15.06,-26.91,A,1,19<br>6.05,18.26,-                 |
| ESR1   | MOL000787 | Fumarine                                      | 92.577  | 25.51,A,17,12<br>7.85,15.46,-19.11,A,91,18<br>4.65,13.46,-                            |
| ESR1   | MOL001510 | 24-epicampesterol                             | 105.392 | 19.91,A,85,14<br>8.65,15.86,-<br>7.45,16.26,-25.91,A,10,3                             |
| ESR1   | MOL001645 | Linoleyl acetate                              | 112.489 | 6.85,17.26,-21.31,A,69,9<br>6.25,12.46,-26.11,A,5,22<br>4.85,15.86,-                  |
| ESR1   | MOL001771 | poriferast-5-en-<br>3beta-ol                  | 121.811 | 18.91,A,94,14<br>6.65,13.46,-<br>6.85,17.26,-21.31,A,69,2                             |
| ESR1   | MOL001792 | DFV                                           | 96.2617 | 7.45,18.66,-23.11,P,33,11<br>6.25,13.26,-26.51,P,4,19<br>6.45,16.66,-19.11,A,92,10    |
| ESR1   | MOL002268 | Rhein                                         | 92.3996 | 7.65,18.26,-23.71,A,43,11<br>5.45,13.06,-20.51,P,78,15<br>6.05,14.66,-25.11,A,24,4    |
| ESR1   | MOL002714 | baicalein                                     | 100.158 | 9.05,17.86,-25.11,P,18,10<br>5.25,14.06,-                                             |

|      |           |                                                  |         |                                                                                                                                |
|------|-----------|--------------------------------------------------|---------|--------------------------------------------------------------------------------------------------------------------------------|
| ESR1 | MOL002879 | Diop                                             | 53.9475 | 6.65,14.66,-<br>17.51,A,99,14                                                                                                  |
| ESR1 | MOL002959 | 3'-<br>Methoxydaidzein                           | 101.374 | 7.05,15.86,-<br>6.85,17.26,-21.31,A,69,1<br>5.45,16.06,-18.11,A,97,8<br>5.85,13.86,-22.31,P,46,11<br>7.25,18.26,-22.11,P,54,10 |
| ESR1 | MOL003044 | Chryseriol                                       | 103.079 | 8.05,15.46,-25.31,A,20,11<br>5.45,16.06,-<br>4.85,15.86,-                                                                      |
| ESR1 | MOL003542 | 8-Isopentenyl-<br>kaempferol                     | 51.3221 | 18.91,A,94,16<br>8.25,16.06,-19.91,P,87,19<br>5.65,16.86,-19.91,P,88,12                                                        |
| ESR1 | MOL003648 | Inermin                                          | 94.0881 | 7.45,15.26,-<br>23.91,A,39,17<br>6.85,14.66,-                                                                                  |
| ESR1 | MOL004367 | olivil                                           | 119.362 | 19.51,A,89,12<br>6.65,17.26,-<br>6.25,14.86,-                                                                                  |
| ESR1 | MOL004373 | Anhydroicaritin                                  | 89.8572 | 20.91,A,75,22<br>7.25,14.26,-<br>7.45,15.26,-23.91,A,39,3                                                                      |
| ESR1 | MOL004380 | C-<br>Homoerythrinan,<br>1,6-didehydro-          | 35.254  | 8.05,12.46,-22.11,A,62,8<br>5.45,16.06,-<br>5.65,13.46,-21.11,A,74,14                                                          |
| ESR1 | MOL004382 | Yinyanghuo A                                     | 119.545 | 8.85,17.26,-<br>24.31,A,35,19<br>7.45,16.26,-25.91,A,10,2                                                                      |
| ESR1 | MOL004384 | Yinyanghuo C                                     | 101.192 | 7.25,14.66,-<br>18.51,A,95,12<br>7.45,16.26,-25.91,A,10,2                                                                      |
| ESR1 | MOL004386 | Yinyanghuo E                                     | 95.0681 | 7.25,14.66,-<br>18.51,A,95,12<br>8.05,17.46,-25.51,A,16,7                                                                      |
| ESR1 | MOL004391 | 8-(3-methylbut-2-<br>enyl)-2-phenyl-<br>chromone | 97.812  | 7.45,16.26,-25.91,A,10,8<br>5.25,14.06,-<br>6.05,15.86,-                                                                       |
| ESR1 | MOL004396 | 1,2-bis(4-hydroxy-<br>3-<br>methoxyphenyl)pr     | 119.061 | 17.51,A,100,10<br>5.85,17.26,-<br>8.05,17.46,-25.51,A,16,2                                                                     |
| ESR1 | MOL004941 | (2R)-7-hydroxy-2-<br>(4-<br>hydroxyphenyl)chr    | 98.9323 | 4.85,15.86,-<br>18.91,A,94,16<br>5.85,14.26,-26.31,A,3,3                                                                       |
| ESR1 | MOL005308 | Aposiopolamine                                   | 97.2675 | 7.05,15.86,-<br>18.31,A,96,13<br>5.25,15.86,-19.51,P,92,15                                                                     |
| ESR1 | MOL005318 | Dianthramine                                     | 97.5259 | 5.45,12.86,-25.51,P,16,18<br>8.65,11.06,-21.71,P,57,21<br>6.25,14.86,-20.91,A,75,11                                            |
| ESR1 | MOL005320 | arachidonate                                     | 111.066 | 8.05,17.26,-<br>24.31,A,34,16<br>6.45,16.66,-19.11,A,92,6                                                                      |
| ESR1 | MOL005321 | Frutinone A                                      | 103.979 | 7.45,15.26,-<br>23.91,A,39,14<br>4.65,13.46,-                                                                                  |
| ESR1 | MOL005348 | Ginsenoside-<br>Rh4_qt                           | 75.3119 | 19.91,A,85,14<br>7.25,14.66,-<br>6.05,14.66,-25.11,A,24,15                                                                     |
| ESR1 | MOL005356 | Girinimbin                                       | 99.1042 | 8.05,18.66,-<br>22.31,A,59,18<br>5.45,16.06,-18.11,A,97,15                                                                     |
| ESR1 | MOL005376 | Panaxadiol                                       | 101.539 | 9.05,16.86,-23.11,A,45,21<br>7.45,15.26,-                                                                                      |

|      |           |                              |         |                                                                                   |
|------|-----------|------------------------------|---------|-----------------------------------------------------------------------------------|
| ESR1 | MOL005384 | suchilactone                 | 89.3552 | 8.25,15.86,-18.71,P,95,17<br>6.25,16.26,-<br>20.91,A,76,24                        |
| ESR1 | MOL005399 | alexandrin_qt                | 108.409 | 6.05,14.46,-25.71,P,14,1<br>4.45,15.06,-19.51,A,90,11                             |
| ESR1 | MOL006331 | 4',5-<br>Dihydroxyflavone    | 95.9276 | 7.05,16.06,-<br>6.05,18.26,-25.51,A,17,1<br>7.85,16.46,-18.11,A,98,14             |
| ESR1 | MOL008647 | N-Trans-<br>Feruloyltyramine | 117.519 | 6.65,13.46,-24.51,P,19,19<br>6.05,14.66,-25.11,A,24,9<br>7.45,15.66,-26.91,A,2,10 |
| FOS  | MOL000098 | quercetin                    | 125.251 | 7.25,14.66,-<br>62.76,26.56,37.27,A,29,6<br>58.16,32.76,40.67,P,77,19             |
| FOS  | MOL000006 | luteolin                     | 122.487 | 64.96,30.36,35.67,P,20,2<br>57.56,33.96,40.07,P,74,12<br>62.76,28.96,39.07,A,63,1 |
| FOS  | MOL000358 | beta-sitosterol              | 130.632 | 5<br>65.16,32.76,37.47,A,35,6<br>57.56,35.56,36.47,A,20,2                         |
| FOS  | MOL000359 | sitosterol                   | 135.629 | 8<br>59.96,32.16,38.87,A,60,1<br>1                                                |
| FOS  | MOL000422 | kaempferol                   | 117.029 | 56.16,33.76,37.67,A,39,1<br>59.36,31.16,42.27,A,86,9<br>61.76,26.96,37.27,A,30,1  |
| FOS  | MOL000449 | Stigmasterol                 | 131.157 | 3<br>62.36,31.76,37.87,A,43,1<br>1                                                |
| FOS  | MOL000622 | Magnograndiolide             | 96.1256 | 56.36,32.96,36.87,A,25,1<br>63.16,28.96,35.87,A,14,8<br>60.36,33.36,38.47,A,55,1  |
| FOS  | MOL000787 | Fumarine                     | 126.322 | 2<br>60.56,30.76,39.07,A,65,1<br>0                                                |
| FOS  | MOL001510 | 24-epicampesterol            | 123.932 | 61.56,34.16,38.27,A,52,1<br>62.76,26.56,37.27,A,29,1<br>4                         |
| FOS  | MOL001525 | Daucosterol                  | 111.154 | 63.36,30.76,36.47,A,18,1<br>63.36,33.16,37.87,A,44,2<br>3                         |
| FOS  | MOL001645 | Linoleyl acetate             | 140.855 | 56.56,34.36,38.67,A,57,2<br>59.56,27.16,43.67,A,96,6<br>56.16,31.76,35.67,A,13,1  |
| FOS  | MOL001771 | poriferast-5-en-<br>3beta-ol | 135.036 | 6<br>62.36,35.56,39.07,A,67,1<br>3                                                |
| FOS  | MOL001792 | DFV                          | 118.999 | 57.76,33.36,38.07,A,48,2<br>58.96,34.16,39.47,P,65,6<br>58.56,32.76,41.27,A,84,7  |
| FOS  | MOL002268 | Rhein                        | 112.418 | 56.16,31.76,37.07,A,26,1<br>58.56,32.76,41.27,A,84,8<br>62.56,29.56,36.87,A,23,1  |
| FOS  | MOL002714 | baicalein                    | 116.469 | 1<br>58.96,34.16,39.47,P,65,10<br>57.96,30.36,42.47,P,84,14                       |
| FOS  | MOL002879 | Diop                         | 144.593 | 63.56,28.76,37.67,A,37,1<br>58.56,29.36,42.87,A,91,5<br>62.96,30.36,38.27,A,50,1  |
| FOS  | MOL002959 | 3'-<br>Methoxydaidzein       | 127.183 | 3<br>58.76,35.16,37.87,A,45,1<br>6<br>56.16,31.76,35.67,A,13,1                    |

|     |           |                                                                                                                                                                 |         |                                                                                                                                                     |
|-----|-----------|-----------------------------------------------------------------------------------------------------------------------------------------------------------------|---------|-----------------------------------------------------------------------------------------------------------------------------------------------------|
| FOS | MOL003044 | Chryseriol                                                                                                                                                      | 123.112 | 62.76,26.56,37.27,A,29,4<br>61.36,34.96,39.07,P,60,21<br>59.16,31.36,39.47,A,73,2<br>64.96,30.36,35.67,P,20,3                                       |
| FOS | MOL003542 | 8-Isopentenyl-<br>kaempferol                                                                                                                                    | 138.718 | 64.16,32.96,36.27,P,29,5<br>62.56,27.36,36.27,A,15,1<br>59.96,32.16,38.87,A,60,1                                                                    |
| FOS | MOL003648 | Inermin                                                                                                                                                         | 114.285 | 3<br>63.36,33.16,37.87,A,44,1<br>65.16,32.76,37.47,A,35,1                                                                                           |
| FOS | MOL004367 | olivil                                                                                                                                                          | 147.468 | 7<br>58.56,31.76,42.67,A,88,2<br>57.56,33.96,40.07,P,74,5                                                                                           |
| FOS | MOL004373 | Anhydroicaritin                                                                                                                                                 | 141.524 | 63.56,28.76,37.67,A,37,1<br>9                                                                                                                       |
| FOS | MOL004380 | C-<br>Homoerythrinan,<br>1,6-didehydro-                                                                                                                         | 115.984 | 58.96,31.16,41.27,A,83,1<br>2<br>65.16,32.76,37.47,A,35,2<br>61.56,34.16,38.27,A,52,2                                                               |
| FOS | MOL004382 | Yinyanghuo A                                                                                                                                                    | 143.083 | 2<br>62.96,30.36,38.27,A,50,2<br>60.56,30.76,39.07,A,65,1                                                                                           |
| FOS | MOL004384 | Yinyanghuo C                                                                                                                                                    | 136.631 | 0<br>62.16,27.96,37.87,A,40,1<br>60.56,30.76,39.07,A,65,1                                                                                           |
| FOS | MOL004386 | Yinyanghuo E                                                                                                                                                    | 140.28  | 0<br>62.16,27.96,37.87,A,40,1                                                                                                                       |
| FOS | MOL004388 | 6-hydroxy-11,12-<br>dimethoxy-2,2-<br>dimethyl-1,8-<br>dioxo-2,3,4,8-<br>tetrahydro-1H-<br>isochromeno[3,4-<br>8-(3-methylbut-2-<br>enyl)-2-phenyl-<br>chromone | 120.826 | 4<br>58.96,34.16,39.47,P,65,19<br>62.16,27.56,34.87,A,6,22<br>65.16,31.76,37.27,A,34,2<br>4<br>59.96,32.16,38.87,A,60,7<br>58.76,27.56,44.47,A,98,1 |
| FOS | MOL004391 | 1,2-bis(4-hydroxy-<br>3-<br>methoxyphenyl)pr                                                                                                                    | 136.669 | 3<br>57.96,34.76,39.27,P,64,4<br>60.96,28.36,39.87,P,72,12<br>57.56,36.76,35.07,P,15,2<br>63.16,32.56,35.27,P,17,15                                 |
| FOS | MOL004427 | Icariside A7                                                                                                                                                    | 118.014 | 58.16,32.76,40.67,P,77,30<br>56.36,34.16,38.87,P,59,3<br>56.76,34.36,35.47,A,12,2                                                                   |
| FOS | MOL004941 | (2R)-7-hydroxy-2-<br>(4-<br>hydroxyphenyl)chr                                                                                                                   | 120.314 | 59.36,33.16,39.47,A,74,8<br>58.76,30.76,43.47,A,95,1<br>59.36,31.16,42.27,A,86,3                                                                    |
| FOS | MOL005308 | Aposiopolamine                                                                                                                                                  | 108.168 | 62.76,28.56,35.07,A,7,13<br>63.56,27.56,37.27,A,31,1<br>57.36,35.56,35.27,A,11,5                                                                    |
| FOS | MOL005317 | Deoxyharringtonin<br>e                                                                                                                                          | 110.581 | 62.76,33.56,36.27,P,31,12<br>63.36,35.16,39.47,P,66,1<br>58.16,34.36,39.27,A,70,2                                                                   |
| FOS | MOL005318 | Dianthramine                                                                                                                                                    | 114.202 | 58.76,35.76,37.47,P,46,7<br>58.16,30.96,41.27,P,79,1<br>54.76,32.16,35.27,A,9,6                                                                     |
| FOS | MOL005320 | arachidonate                                                                                                                                                    | 144.383 | 59.56,30.16,40.27,A,77,1<br>0<br>63.56,28.76,37.67,A,37,2                                                                                           |
| FOS | MOL005321 | Frutinone A                                                                                                                                                     | 107.471 | 63.36,30.76,36.47,A,18,6<br>57.56,32.36,42.67,A,89,1<br>61.56,34.16,38.27,A,52,1                                                                    |
| FOS | MOL005348 | Ginsenoside-<br>Rh4_qt                                                                                                                                          | 102.471 | 62.76,26.56,37.27,A,29,1<br>7                                                                                                                       |

|      |           |                                       |         |                                                                                                              |
|------|-----------|---------------------------------------|---------|--------------------------------------------------------------------------------------------------------------|
| FOS  | MOL005356 | Girinimbin                            | 112.005 | 58.96,31.16,41.27,A,83,3<br>59.36,33.16,39.47,A,74,6<br>63.56,27.56,37.27,A,31,1<br>58.96,31.16,41.27,A,83,3 |
| FOS  | MOL005356 | Girinimbin                            | 112.005 | 59.36,33.16,39.47,A,74,6<br>63.56,27.56,37.27,A,31,1<br>59.16,31.36,39.47,A,73,2                             |
| FOS  | MOL005376 | Girinimbin                            | 92.8526 | 0<br>60.76,35.76,37.67,P,49,25<br>58.56,29.36,42.87,A,91,1                                                   |
| FOS  | MOL005384 | suchilactone                          | 143.332 | 6<br>60.36,34.56,39.07,A,66,2<br>63.96,30.16,38.87,A,59,1                                                    |
| FOS  | MOL005399 | alexandrin_qt                         | 122.17  | 2<br>62.76,34.76,38.67,A,58,1<br>62.96,30.36,38.27,A,50,1                                                    |
| FOS  | MOL006331 | 4',5-Dihydroxyflavone                 | 117.71  | 58.96,31.16,41.27,A,83,8<br>57.56,27.76,46.27,P,99,1<br>54.96,32.96,37.07,A,27,1                             |
| FOS  | MOL008647 | N-Trans-Feruloyltyramine              | 142.776 | 2<br>58.56,29.36,42.87,A,91,1<br>65.96,32.96,38.27,P,54,1                                                    |
| FOS  | MOL009763 | (+)-Syringaresinol-O-beta-D-glucoside | 130.07  | 61.56,26.76,34.07,P,6,9<br>62.76,34.76,38.67,A,58,1<br>20.51,31.12,6.55,A,88,12                              |
| IL-6 | MOL000098 | quercetin                             | 98.9915 | 20.71,29.72,6.35,A,84,13<br>27.31,36.32,5.55,P,87,17<br>19.11,34.92,3.15,A,56,4                              |
| IL-6 | MOL000006 | luteolin                              | 112.193 | 20.51,31.12,6.55,A,88,16<br>20.71,29.72,6.35,A,84,18<br>20.71,29.72,6.35,A,84,16                             |
| IL-6 | MOL000422 | kaempferol                            | 103.126 | 20.51,31.12,6.55,A,88,17<br>27.31,36.32,5.55,P,87,19<br>21.91,32.32,5.15,A,77,12                             |
| IL-6 | MOL000622 | Magnograndiolide                      | 84.322  | 19.31,38.12,3.15,A,58,16<br>19.11,35.92,2.75,P,67,17<br>21.91,32.32,5.15,A,77,18                             |
| IL-6 | MOL000787 | Fumarine                              | 77.1172 | 19.71,35.32,4.95,A,74,20<br>21.31,33.92,3.35,A,59,21<br>17.91,22.92,-4.85,A,14,1                             |
| IL-6 | MOL001645 | Linoleyl acetate                      | 129.582 | 18.51,20.52,-5.05,A,11,3<br>24.91,20.52,-<br>19.51,36.12,3.55,A,63,9                                         |
| IL-6 | MOL001792 | DFV                                   | 101.684 | 21.31,28.72,6.75,A,98,14<br>20.51,35.72,1.55,P,55,19<br>20.71,37.52,3.15,A,57,11                             |
| IL-6 | MOL002268 | Rhein                                 | 91.1466 | 20.51,30.12,5.15,A,76,17<br>20.11,34.92,2.95,P,69,20<br>19.11,34.92,3.15,A,56,4                              |
| IL-6 | MOL002714 | baicalein                             | 108.912 | 20.51,31.12,6.55,A,88,17<br>20.71,29.72,6.35,A,84,19<br>28.51,36.92,3.35,A,61,19                             |
| IL-6 | MOL002879 | Diop                                  | 86.2024 | 26.51,30.72,1.35,A,47,24<br>25.51,28.72,-<br>21.11,31.12,4.95,A,71,5                                         |
| IL-6 | MOL002959 | 3'-Methoxydaidzein                    | 92.7741 | 22.11,33.52,3.35,P,71,11<br>20.71,37.52,3.15,A,57,16<br>20.51,37.12,2.35,P,64,14                             |
| IL-6 | MOL003044 | Chryseriol                            | 94.6263 | 20.51,31.12,6.55,A,88,15<br>19.71,28.92,6.35,P,96,20<br>19.91,32.32,3.95,P,76,3                              |
| IL-6 | MOL003542 | 8-Isopentenyl-kaempferol              | 116.066 | 20.11,34.92,2.95,P,69,5<br>25.71,35.92,6.75,A,100,2                                                          |

|      |           |                                                                                                                              |         |                                                                                                             |
|------|-----------|------------------------------------------------------------------------------------------------------------------------------|---------|-------------------------------------------------------------------------------------------------------------|
| IL-6 | MOL003648 | Inermin                                                                                                                      | 108.857 | 22.51,27.12,6.75,P,99,3<br>21.31,35.72,3.75,A,65,17<br>19.11,34.92,3.15,A,56,19<br>27.31,36.32,5.55,P,87,6  |
| IL-6 | MOL004367 | olivil                                                                                                                       | 111.767 | 21.91,32.32,5.15,A,77,13<br>19.51,36.12,3.55,A,63,24<br>19.91,32.32,3.95,P,76,1                             |
| IL-6 | MOL004373 | Anhydroicaritin                                                                                                              | 123.662 | 20.11,34.92,2.95,P,69,3<br>25.71,35.92,6.75,A,100,2<br>21.11,31.12,4.95,A,71,9                              |
| IL-6 | MOL004380 | C-<br>Homoerythrinan,<br>1,6-didehydro-                                                                                      | 99.0789 | 21.11,34.12,4.95,A,73,16<br>20.71,37.52,3.15,A,57,24<br>22.51,27.12,6.75,P,99,6                             |
| IL-6 | MOL004382 | Yinyanghuo A                                                                                                                 | 85.489  | 25.71,35.92,6.75,A,100,1<br>5                                                                               |
| IL-6 | MOL004386 | Yinyanghuo E                                                                                                                 | 91.0784 | 25.71,35.92,6.75,A,100,3<br>20.11,30.32,4.95,P,83,22<br>21.51,25.92,6.55,A,87,25<br>19.11,34.92,3.15,A,56,2 |
| IL-6 | MOL004388 | dioxo-2,3,4,8-<br>tetrahydro-1H-<br>isochromeno[3,4-<br>h]isoquinolin-2-<br>8-(3-methylbut-2-<br>enyl)-2-phenyl-<br>chromone | 84.2676 | 25.71,35.92,6.75,A,100,2<br>1<br>20.71,29.72,6.35,A,84,26<br>18.51,34.52,2.95,P,68,4                        |
| IL-6 | MOL004391 | 1,2-bis(4-hydroxy-<br>3-<br>methoxyphenyl)pr<br>(2R)-7-hydroxy-2-<br>(4-<br>hydroxyphenyl)chr                                | 98.6761 | 19.31,37.12,4.35,A,69,6<br>20.71,29.72,6.35,A,84,16<br>20.51,31.12,6.55,A,88,3                              |
| IL-6 | MOL004396 | 3-<br>methoxyphenyl)pr<br>(2R)-7-hydroxy-2-<br>(4-<br>hydroxyphenyl)chr                                                      | 111.877 | 21.51,35.12,2.15,P,62,12<br>19.11,35.92,2.75,P,67,14<br>20.71,29.72,6.35,A,84,15                            |
| IL-6 | MOL004941 | (4-<br>hydroxyphenyl)chr                                                                                                     | 105.642 | 20.51,31.12,6.55,A,88,16<br>20.51,37.12,2.35,P,64,19<br>19.91,28.72,6.75,A,97,1                             |
| IL-6 | MOL005308 | Aposiopalamine                                                                                                               | 95.5172 | 21.31,28.72,6.75,A,98,6<br>19.11,35.92,2.75,P,67,18<br>25.71,35.92,6.75,A,100,3                             |
| IL-6 | MOL005318 | Dianthramine                                                                                                                 | 78.2815 | 20.51,31.12,6.55,A,88,12<br>18.91,33.72,3.75,P,74,21<br>24.91,20.52,-                                       |
| IL-6 | MOL005320 | arachidonate                                                                                                                 | 125.93  | 2.05,A,38,10<br>16.11,22.12,-3.45,A,26,19<br>25.71,35.92,6.75,A,100,1                                       |
| IL-6 | MOL005321 | Frutinone A                                                                                                                  | 95.593  | 20.71,32.72,4.15,A,68,14<br>19.91,28.72,6.75,A,97,17<br>19.91,28.72,6.75,A,97,2                             |
| IL-6 | MOL005356 | Girinimbin                                                                                                                   | 107.238 | 21.11,36.52,2.15,A,52,19<br>19.31,38.12,3.15,A,58,20<br>19.31,37.12,4.35,A,69,7                             |
| IL-6 | MOL005384 | suchilactone                                                                                                                 | 108.15  | 20.51,31.12,6.55,A,88,18<br>19.91,28.72,6.75,A,97,24<br>19.31,37.12,4.35,A,69,14                            |
| IL-6 | MOL005399 | alexandrin_qt                                                                                                                | 82.379  | 20.71,29.72,6.35,A,84,19<br>26.71,35.52,6.55,A,89,29<br>20.71,37.52,3.15,A,57,2                             |
| IL-6 | MOL006331 | 4',5-<br>Dihydroxyflavone                                                                                                    | 98.5775 | 20.31,35.12,2.75,A,54,6<br>20.71,29.72,6.35,A,84,14<br>22.31,26.52,6.75,A,95,11                             |
| IL-6 | MOL008647 | N-Trans-<br>Feruloyltyramine                                                                                                 | 126.247 | 21.11,34.12,4.95,A,73,17<br>21.11,36.52,2.15,A,52,20<br>44.60,43.33,6.97,A,33,12                            |
| MYC  | MOL000098 | quercetin                                                                                                                    | 85.4999 | 42.60,46.33,7.17,P,41,19<br>47.60,39.73,4.37,P,23,22                                                        |



|     |           |                          |         |                                                                                                             |
|-----|-----------|--------------------------|---------|-------------------------------------------------------------------------------------------------------------|
| MYC | MOL000006 | luteolin                 | 92.1022 | 47.00,41.53,5.37,A,24,9<br>42.80,43.13,7.57,A,40,11<br>42.40,45.53,7.97,P,47,14<br>47.00,41.53,5.37,A,24,13 |
| MYC | MOL000358 | beta-sitosterol          | 103.46  | 44.20,43.93,7.37,A,38,21<br>45.40,42.73,9.17,P,53,25<br>44.60,42.13,7.77,A,42,6                             |
| MYC | MOL000359 | sitosterol               | 101.7   | 47.80,40.73,4.97,A,20,10<br>42.40,45.53,7.97,P,47,30<br>47.60,39.73,4.37,P,23,11                            |
| MYC | MOL000422 | kaempferol               | 79.1184 | 44.60,43.33,6.97,A,33,17<br>42.60,46.33,7.17,P,41,18<br>44.20,43.93,7.37,A,38,2                             |
| MYC | MOL000449 | Stigmasterol             | 96.756  | 47.80,40.73,4.97,A,20,7<br>45.40,42.73,9.17,P,53,30<br>44.60,43.33,6.97,A,33,6                              |
| MYC | MOL000622 | Magnograndiolide         | 73.8574 | 45.40,42.73,9.17,P,53,17<br>47.80,40.73,4.97,A,20,19<br>44.60,43.33,6.97,A,33,14                            |
| MYC | MOL000787 | Fumarine                 | 93.7856 | 45.20,43.13,5.57,A,26,18<br>48.80,39.73,4.57,P,24,25<br>44.60,43.33,8.77,A,57,2                             |
| MYC | MOL001510 | 24-epicampesterol        | 101.409 | 44.60,42.13,7.77,A,42,3<br>46.40,41.33,6.37,A,28,7<br>47.80,40.73,4.97,A,20,10                              |
| MYC | MOL001525 | Daucosterol              | 88.3966 | 44.60,42.13,7.77,A,42,20<br>44.60,43.33,8.77,A,57,22<br>44.60,42.13,7.77,A,42,7                             |
| MYC | MOL001645 | Linoleyl acetate         | 99.9731 | 46.40,41.33,6.37,A,28,10<br>48.80,39.73,3.57,A,17,17<br>44.20,43.93,7.37,A,38,1                             |
| MYC | MOL001771 | poriferast-5-en-3beta-ol | 100.606 | 47.80,40.73,4.97,A,20,8<br>45.40,42.73,9.17,P,53,15<br>45.80,42.13,7.17,A,35,2                              |
| MYC | MOL001792 | DFV                      | 84.5383 | 43.40,44.73,8.17,A,51,10<br>48.60,39.93,4.57,A,18,14<br>45.20,43.13,5.57,A,26,11                            |
| MYC | MOL002268 | Rhein                    | 60.192  | 44.40,42.33,6.37,A,29,12<br>44.60,42.13,7.77,A,42,13<br>44.20,43.93,7.37,A,38,4                             |
| MYC | MOL002714 | baicalein                | 81.2363 | 42.40,45.53,7.97,P,47,14<br>48.80,39.73,3.57,A,17,18<br>50.80,38.93,14.37,A,83,1                            |
| MYC | MOL002879 | Diop                     | 90.2087 | 9<br>44.80,42.13,4.77,A,19,25<br>45.80,42.13,7.17,A,35,1                                                    |
| MYC | MOL002959 | 3'-Methoxydaidzein       | 80.1748 | 43.40,44.73,8.17,A,51,8<br>48.60,39.93,4.57,A,18,16<br>45.60,42.13,5.77,A,27,9                              |
| MYC | MOL003044 | Chryseriol               | 92.086  | 42.20,44.13,7.77,P,44,12<br>47.80,40.73,4.97,A,20,16<br>45.20,42.93,8.97,A,59,22                            |
| MYC | MOL003542 | 8-Isopentenyl-kaempferol | 86.1744 | 42.80,43.13,7.57,A,40,25<br>44.20,42.13,5.37,A,25,26<br>48.80,39.73,4.57,P,24,5                             |
| MYC | MOL003648 | Inermin                  | 98.7157 | 47.00,41.53,5.37,A,24,6<br>44.60,42.13,7.77,A,42,13<br>44.40,42.53,8.37,P,48,2                              |
| MYC | MOL004367 | olivil                   | 104.107 | 45.40,41.33,4.57,P,25,3<br>49.00,39.53,3.37,P,20,4<br>45.40,42.73,9.17,P,53,1                               |
| MYC | MOL004373 | Anhydroicaritin          | 84.9107 | 47.60,39.73,4.37,P,23,6<br>48.80,39.73,3.57,A,17,27                                                         |

|     |           |                                                                                                                                  |         |                                                                                                             |
|-----|-----------|----------------------------------------------------------------------------------------------------------------------------------|---------|-------------------------------------------------------------------------------------------------------------|
| MYC | MOL004380 | C-<br>Homoerythrinan,<br>1,6-didehydro-                                                                                          | 85.2259 | 44.80,42.13,4.77,A,19,7<br>45.20,42.93,8.97,A,59,12<br>48.80,39.73,3.57,A,17,20<br>45.80,42.13,7.17,A,35,12 |
| MYC | MOL004382 | Yinyanghuo A                                                                                                                     | 94.2848 | 43.40,42.13,6.97,A,32,18<br>44.80,42.13,4.77,A,19,19<br>45.60,42.33,8.17,A,50,18                            |
| MYC | MOL004384 | Yinyanghuo C                                                                                                                     | 79.2083 | 47.00,41.53,5.37,A,24,24<br>44.80,42.13,4.77,A,19,25<br>45.80,42.13,7.17,A,35,23                            |
| MYC | MOL004386 | Yinyanghuo E                                                                                                                     | 80.1774 | 44.80,42.13,4.77,A,19,25<br>43.40,42.13,6.97,A,32,26                                                        |
| MYC | MOL004388 | 6-hydroxy-11,12-<br>dimethoxy-2,2-<br>dimethyl-1,8-<br>dioxo-2,3,4,8-<br>tetrahydro-1H-<br>isochromenof3,4-<br>8-(3-methylbut-2- | 76.247  | 45.60,42.13,5.77,A,27,17<br>42.20,44.13,7.77,P,44,19<br>47.80,40.73,4.97,A,20,26                            |
| MYC | MOL004391 | enyl)-2-phenyl-<br>chromone<br>Anhydroicaritin-3-                                                                                | 92.0853 | 46.20,42.53,4.97,A,22,2<br>43.80,42.13,4.97,P,28,4<br>43.20,45.33,7.97,A,49,7<br>42.80,43.13,7.57,A,40,7    |
| MYC | MOL004394 | O-alpha-L-<br>rhamnoside                                                                                                         | 85.4353 | 46.40,40.73,4.77,P,26,9<br>43.80,42.13,4.97,P,28,11<br>44.60,42.13,7.77,A,42,3                              |
| MYC | MOL004396 | 1,2-bis(4-hydroxy-<br>3-<br>methoxyphenyl)pr                                                                                     | 87.3239 | 44.20,41.53,8.97,P,52,5<br>46.00,41.13,4.97,A,21,20<br>47.80,40.73,4.97,A,20,25                             |
| MYC | MOL004425 | Icariin                                                                                                                          | 76.0302 | 43.20,45.33,7.97,A,49,28<br>40.60,45.13,7.57,A,41,47<br>48.80,39.73,3.57,A,17,17                            |
| MYC | MOL004427 | Icariside A7                                                                                                                     | 84.9489 | 44.80,42.13,4.77,A,19,18<br>42.20,44.13,7.77,P,44,20<br>43.40,42.13,6.97,A,32,13                            |
| MYC | MOL004941 | (2R)-7-hydroxy-2-<br>(4-<br>hydroxyphenyl)chr                                                                                    | 81.4326 | 48.80,39.73,4.57,P,24,17<br>42.20,44.13,7.77,P,44,18<br>45.60,42.33,8.17,A,50,13                            |
| MYC | MOL005308 | Aposiopolamine                                                                                                                   | 78.7358 | 47.00,41.53,5.37,A,24,14<br>45.60,42.13,5.77,A,27,15<br>48.80,39.73,4.57,P,24,28                            |
| MYC | MOL005317 | Deoxyharringtonin<br>e                                                                                                           | 100.85  | 45.20,43.13,5.57,A,26,32<br>44.60,43.33,6.97,A,33,34<br>43.20,45.33,7.97,A,49,2                             |
| MYC | MOL005318 | Dianthramine                                                                                                                     | 62.7779 | 47.80,40.73,4.97,A,20,12<br>46.20,42.53,4.97,A,22,14<br>37.20,45.13,11.57,A,71,5                            |
| MYC | MOL005320 | arachidonate                                                                                                                     | 100.372 | 38.00,46.33,11.97,A,73,6<br>45.80,42.13,7.17,A,35,17<br>48.80,39.73,3.57,A,17,3                             |
| MYC | MOL005321 | Frutinone A                                                                                                                      | 81.5946 | 45.80,42.13,7.17,A,35,15<br>44.60,43.33,8.77,A,57,17<br>47.00,41.53,5.37,A,24,26                            |
| MYC | MOL005348 | Ginsenoside-<br>Rh4qt                                                                                                            | 89.3999 | 48.60,39.93,4.57,A,18,28<br>42.80,43.13,7.57,A,40,30<br>48.80,39.73,3.57,A,17,1                             |
| MYC | MOL005356 | Girinimbin                                                                                                                       | 89.0469 | 45.60,42.13,5.77,A,27,13<br>43.40,42.13,6.97,A,32,18<br>44.20,42.13,5.37,A,25,20                            |
| MYC | MOL005376 | Panaxadiol                                                                                                                       | 81.1163 | 42.20,44.13,7.97,A,47,29<br>43.80,42.53,8.57,A,55,30<br>47.00,41.53,5.37,A,24,10                            |
| MYC | MOL005384 | suchilactone                                                                                                                     | 97.4792 | 45.20,43.13,5.57,A,26,11<br>44.60,43.33,6.97,A,33,12                                                        |

|        |           |                                       |         |                                                                                                             |
|--------|-----------|---------------------------------------|---------|-------------------------------------------------------------------------------------------------------------|
| MYC    | MOL005399 | alexandrin_qt                         | 97.4024 | 46.00,41.13,4.97,A,21,14<br>43.20,45.33,7.97,A,49,18<br>48.60,39.93,4.57,A,18,23<br>43.40,42.13,6.97,A,32,2 |
| MYC    | MOL006331 | 4',5-Dihydroxyflavone                 | 56.235  | 45.80,42.13,7.17,A,35,6<br>42.20,44.13,7.77,P,44,18<br>48.80,39.73,4.57,P,24,3                              |
| MYC    | MOL008647 | N-Trans-Feruloyltyramine              | 100.138 | 42.20,44.13,7.77,P,44,4<br>43.40,42.13,6.97,A,32,22<br>45.40,41.33,4.57,P,25,9                              |
| MYC    | MOL009763 | (+)-Syringaresinol-O-beta-D-glucoside | 120.575 | 45.60,42.13,5.77,A,27,32<br>48.80,39.73,3.57,A,17,39<br>-25.34,48.97,-                                      |
| CDKN1A | MOL000098 | quercetin                             | 67.6121 | 14.31,A,63,2<br>-26.74,49.37,-<br>-32.34,56.17,-23.31,A,7,4                                                 |
| CDKN1A | MOL000006 | luteolin                              | 98.408  | -30.54,52.37,-<br>23.91,P,12,12<br>-36.54,57.97,-                                                           |
| CDKN1A | MOL000358 | beta-sitosterol                       | 81.6822 | 23.91,A,4,10<br>-31.14,54.17,-<br>-32.94,54.97,-24.71,A,3,7                                                 |
| CDKN1A | MOL000359 | sitosterol                            | 98.6929 | -31.54,54.57,-<br>22.11,A,14,10<br>-26.74,49.37,-                                                           |
| CDKN1A | MOL000422 | kaempferol                            | 66.3948 | 12.31,A,73,7<br>-25.34,48.97,-<br>-31.14,58.77,-                                                            |
| CDKN1A | MOL000449 | Stigmasterol                          | 95.1326 | 10.91,A,81,7<br>-31.74,58.17,-<br>-31.54,54.37,-                                                            |
| CDKN1A | MOL000622 | Magnograndiolide                      | 85.7204 | 20.51,A,27,5<br>-32.94,57.17,-<br>-31.14,54.17,-                                                            |
| CDKN1A | MOL000787 | Fumarine                              | 91.1649 | 24.91,A,2,18<br>-31.94,55.97,-<br>-31.14,58.77,-                                                            |
| CDKN1A | MOL001510 | 24-epicampesterol                     | 86.1383 | 10.91,A,81,8<br>-31.74,58.17,-<br>-36.54,57.97,-                                                            |
| CDKN1A | MOL001525 | Daucosterol                           | 83.2616 | 23.91,A,4,14<br>-31.74,54.57,-<br>-31.54,54.37,-                                                            |
| CDKN1A | MOL001645 | Linoleyl acetate                      | 114.894 | 20.51,A,27,3<br>-32.34,56.17,-23.31,A,7,6<br>-36.54,57.97,-                                                 |
| CDKN1A | MOL001771 | poriferast-5-en-3beta-ol              | 94.4304 | 23.91,A,4,16<br>-31.94,55.97,-<br>-26.74,53.97,-9.11,A,87,1                                                 |
| CDKN1A | MOL001792 | DFV                                   | 107.676 | -26.14,51.17,-<br>11.71,A,77,7<br>-30.94,58.97,-                                                            |
| CDKN1A | MOL002268 | Rhein                                 | 92.9233 | 18.11,A,36,10<br>-30.74,53.37,-<br>-31.34,56.37,-                                                           |
| CDKN1A | MOL002714 | baicalein                             | 88.3563 | 15.11,A,55,4<br>-31.54,54.57,-<br>-37.74,58.17,-                                                            |
| CDKN1A | MOL002879 | Diop                                  | 103.647 | 22.91,A,9,13<br>-31.94,55.97,-<br>-26.14,51.17,-                                                            |
| CDKN1A | MOL002959 | 3'-Methoxydaidzein                    | 98.0434 | 11.71,A,77,1<br>-25.34,47.17,-                                                                              |

|        |           |                                                                                                                    |         |                                                                                                           |
|--------|-----------|--------------------------------------------------------------------------------------------------------------------|---------|-----------------------------------------------------------------------------------------------------------|
| CDKN1A | MOL003044 | Chryseriol                                                                                                         | 99.4597 | -32.34,56.17,-23.31,A,7,4                                                                                 |
| CDKN1A | MOL003542 | 8-Isopentenyl-kaempferol                                                                                           | 106.006 | -30.54,52.37,-23.91,P,12,12<br>-36.54,57.97,-23.91,A,4,17<br>-31.54,54.37,-29.74,52.97,-                  |
| CDKN1A | MOL003648 | Inermin                                                                                                            | 101.293 | 20.91,A,24,4<br>-31.94,55.97,-39.14,57.97,-                                                               |
| CDKN1A | MOL004367 | olivil                                                                                                             | 115.036 | 23.31,P,17,6<br>-32.34,56.17,-31.74,54.57,-                                                               |
| CDKN1A | MOL004373 | Anhydroicaritin                                                                                                    | 94.3067 | 23.51,A,6,18<br>-38.74,59.77,-31.54,54.37,-                                                               |
| CDKN1A | MOL004380 | C-Homoerythrinan, 1,6-didehydro-                                                                                   | 80.488  | 20.51,A,27,9<br>-31.34,55.97,-32.34,56.17,-                                                               |
| CDKN1A | MOL004382 | Yinyanghuo A                                                                                                       | 121.532 | 23.31,A,7,16<br>-38.74,59.77,-30.34,62.97,-                                                               |
| CDKN1A | MOL004384 | Yinyanghuo C                                                                                                       | 89.1586 | 13.51,P,64,19<br>-30.74,58.57,-30.14,58.37,-                                                              |
| CDKN1A | MOL004386 | Yinyanghuo E                                                                                                       | 107.43  | 7.31,P,99,19<br>-28.14,56.17,-                                                                            |
| CDKN1A | MOL004388 | 6-hydroxy-11,12-dimethoxy-2,2-dimethyl-1,8-dioxo-2,3,4,8-tetrahydro-1H-isochromenof[3,4-b]pyridine-2-yl)-2-phenyl- | 80.8365 | -31.74,54.57,-23.51,A,6,9<br>-29.74,52.97,-20.91,A,24,12<br>-28.14,56.17,-16.11,P,40,19<br>-30.54,52.37,- |
| CDKN1A | MOL004391 | enyl)-2-phenyl-chromone                                                                                            | 102.78  | 23.91,P,12,4<br>-32.34,52.57,-31.54,54.37,-                                                               |
| CDKN1A | MOL004394 | Anhydroicaritin-3-O-alpha-L-rhamnoside                                                                             | 94.7532 | 20.51,A,27,4<br>-31.14,54.17,-24.91,A,2,7                                                                 |
| CDKN1A | MOL004396 | 1,2-bis(4-hydroxy-3-methoxyphenyl)pr                                                                               | 113.497 | -24.74,50.17,-13.51,A,69,10<br>-24.74,50.97,-37.74,58.17,-                                                |
| CDKN1A | MOL004427 | Icariside A7                                                                                                       | 92.2454 | 22.91,A,9,10<br>-41.54,61.57,-28.34,58.97,-                                                               |
| CDKN1A | MOL004941 | (2R)-7-hydroxy-2-(4-hydroxyphenyl)chr                                                                              | 91.0743 | 19.91,A,30,2<br>-29.74,54.17,-31.14,54.17,-24.91,A,2,3                                                    |
| CDKN1A | MOL005308 | Aposiopolamine                                                                                                     | 92.8925 | -36.54,57.97,-23.91,A,4,14<br>-30.94,58.97,-                                                              |
| CDKN1A | MOL005317 | Deoxyharringtonine                                                                                                 | 80.4613 | 18.11,A,36,27<br>-32.34,56.17,-31.74,51.97,-                                                              |
| CDKN1A | MOL005318 | Dianthramine                                                                                                       | 80.5083 | 19.91,A,29,2<br>-32.94,57.17,-38.74,59.77,-                                                               |
| CDKN1A | MOL005320 | arachidonate                                                                                                       | 125.898 | 21.51,A,21,8<br>-30.74,53.37,-36.54,57.97,-23.91,A,4,2                                                    |
| CDKN1A | MOL005321 | Frutinone A                                                                                                        | 88.5711 | -30.34,53.97,-25.71,P,7,13                                                                                |

|        |           |                                               |         |                                                                                           |
|--------|-----------|-----------------------------------------------|---------|-------------------------------------------------------------------------------------------|
| CDKN1A | MOL005356 | Girinimbin                                    | 94.8741 | -32.94,57.17,-<br>22.11,A,15,13<br>-30.74,53.37,-<br>-24.74,65.17,-9.71,P,82,6            |
| CDKN1A | MOL005384 | suchilactone                                  | 106.599 | -30.14,58.77,-<br>10.31,P,80,17<br>-24.34,54.97,-8.51,A,93,9                              |
| CDKN1A | MOL005399 | alexandrin_qt                                 | 108.388 | -25.14,50.77,-<br>10.51,A,82,19<br>-22.94,54.97,-7.71,A,99,1                              |
| CDKN1A | MOL006331 | 4',5-<br>Dihydroxyflavone                     | 89.8052 | -24.74,50.97,-<br>12.31,A,74,13<br>-22.54,53.37,-                                         |
| CDKN1A | MOL008647 | N-Trans-<br>Feruloyltyramine                  | 123.161 | 8.11,A,94,12<br>-26.14,51.17,-<br>-28.54,65.37,-                                          |
| CDKN1A | MOL009763 | (+)-Syringaresinol-<br>O-beta-D-<br>glucoside | 113.64  | 12.71,P,73,13<br>-31.74,58.17,-<br>-                                                      |
| RB1    | MOL000098 | quercetin                                     | 80.9989 | 10.52,37.05,24.99,A,53,6<br>-9.12,43.85,23.99,P,44,21<br>-                                |
| RB1    | MOL000006 | luteolin                                      | 90.9993 | 14.32,39.45,20.39,P,21,10<br>-                                                            |
| RB1    | MOL000358 | beta-sitosterol                               | 94.9363 | 12.92,38.26,22.19,A,38,6<br>-                                                             |
| RB1    | MOL000359 | sitosterol                                    | 92.3485 | -11.12,36.66,26.39,A,56,2<br>-                                                            |
| RB1    | MOL000422 | kaempferol                                    | 87.8474 | 12.12,37.66,25.79,A,55,3<br>0.88,38.85,29.99,P,70,11<br>-                                 |
| RB1    | MOL000449 | Stigmasterol                                  | 99.688  | 3.72,36.85,28.59,A,65,17<br>-                                                             |
| RB1    | MOL000622 | Magnograndiolide                              | 75.9954 | 10.52,36.45,23.59,A,48,1<br>-                                                             |
| RB1    | MOL000787 | Fumarine                                      | 62.874  | 2.08,37.05,29.99,A,80,8<br>0.68,39.26,31.39,P,77,17<br>-0.72,31.86,33.79,P,88,18<br>-     |
| RB1    | MOL001510 | 24-epicampesterol                             | 95.0305 | 12.12,37.66,25.79,A,55,2<br>0<br>-                                                        |
| RB1    | MOL001525 | Daucosterol                                   | 89.2167 | 10.12,35.85,25.39,A,54,2<br>-                                                             |
| RB1    | MOL001645 | Linoleyl acetate                              | 115.939 | 12.12,37.66,25.79,A,55,1<br>6<br>2.08,37.05,29.99,A,80,1<br>-4.92,36.26,29.19,A,71,7<br>- |
| RB1    | MOL001771 | poriferast-5-en-<br>3beta-ol                  | 97.3357 | -<br>10.12,35.85,25.39,A,54,2<br>-                                                        |
| RB1    | MOL001792 | DFV                                           | 85.772  | -<br>12.12,36.85,22.39,A,40,2<br>-                                                        |
| RB1    | MOL002268 | Rhein                                         | 81.0317 | 2.28,36.05,30.99,A,88,8<br>2.28,38.66,30.39,P,73,18<br>0.08,30.86,34.79,P,94,21<br>-      |
| RB1    | MOL002714 | baicalein                                     | 86.0045 | 12.92,38.26,22.19,A,38,1<br>1                                                             |

|     |           |                                                                                                                                                                 |         |                                                                                                               |
|-----|-----------|-----------------------------------------------------------------------------------------------------------------------------------------------------------------|---------|---------------------------------------------------------------------------------------------------------------|
| RB1 | MOL002879 | Diop                                                                                                                                                            | 94.6178 | 10.52,37.05,24.99,A,53,1<br>4                                                                                 |
| RB1 | MOL002959 | 3'-<br>Methoxydaidzein                                                                                                                                          | 97.4539 | 14.12,37.66,21.79,P,30,10<br>-                                                                                |
| RB1 | MOL003044 | Chryseriol                                                                                                                                                      | 86.6156 | 14.32,39.45,20.39,P,21,10<br>-                                                                                |
| RB1 | MOL003542 | 8-Isopentenyl-<br>kaempferol                                                                                                                                    | 92.4392 | -14.32,39.45,20.39,P,21,3<br>-                                                                                |
| RB1 | MOL003648 | Inermin                                                                                                                                                         | 86.3126 | 10.92,38.05,22.19,A,37,1<br>-14.32,39.45,20.39,P,21,5                                                         |
| RB1 | MOL004367 | olivil                                                                                                                                                          | 113.857 | -6.32,36.26,31.59,P,79,7<br>-                                                                                 |
| RB1 | MOL004373 | Anhydroicaritin                                                                                                                                                 | 99.5343 | -14.32,39.45,20.39,P,21,1<br>-                                                                                |
| RB1 | MOL004380 | C-<br>Homoerythrinan,<br>1,6-didehydro-                                                                                                                         | 87.8053 | 12.12,36.85,22.39,A,40,2<br>2.28,36.05,30.99,A,88,7<br>1.28,38.26,30.99,A,90,9                                |
| RB1 | MOL004382 | Yinyanghuo A                                                                                                                                                    | 114.203 | -<br>-                                                                                                        |
| RB1 | MOL004384 | Yinyanghuo C                                                                                                                                                    | 97.7447 | 12.12,36.85,22.39,A,40,1<br>6<br>-                                                                            |
| RB1 | MOL004386 | Yinyanghuo E                                                                                                                                                    | 99.5916 | 12.32,32.85,22.79,A,44,2<br>-                                                                                 |
| RB1 | MOL004388 | 6-hydroxy-11,12-<br>dimethoxy-2,2-<br>dimethyl-1,8-<br>dioxo-2,3,4,8-<br>tetrahydro-1H-<br>isochromeno[3,4-<br>8-(3-methylbut-2-<br>enyl)-2-phenyl-<br>chromone | 74.5749 | -0.72,31.86,33.79,P,88,1<br>0.28,34.66,29.19,A,69,10<br>2.08,37.05,29.99,A,80,21<br>-14.32,39.45,20.39,P,21,4 |
| RB1 | MOL004391 | Anhydroicaritin-3-<br>O-alpha-L-<br>rhamnoside                                                                                                                  | 96.5146 | 11.92,37.45,24.19,A,50,1<br>-                                                                                 |
| RB1 | MOL004394 | 1,2-bis(4-hydroxy-<br>3-<br>methoxyphenyl)pr                                                                                                                    | 109.632 | 10.32,41.45,22.19,P,35,29<br>-                                                                                |
| RB1 | MOL004396 | 3-<br>methoxyphenyl)pr                                                                                                                                          | 98.3575 | 10.92,38.05,22.19,A,37,3<br>-                                                                                 |
| RB1 | MOL004425 | Icariin                                                                                                                                                         | 80.4506 | 0.32,31.25,34.59,A,97,26<br>0.08,34.45,30.99,A,87,39<br>-                                                     |
| RB1 | MOL004427 | Icariside A7                                                                                                                                                    | 82.0436 | 12.92,38.26,22.19,A,38,1<br>7                                                                                 |
| RB1 | MOL004941 | (2R)-7-hydroxy-2-<br>(4-<br>hydroxyphenyl)chr                                                                                                                   | 82.3028 | 0.08,34.45,30.99,A,87,9<br>1.28,38.26,30.99,A,90,15<br>-0.12,40.05,30.19,P,71,18<br>-11.52,35.66,24.59,A,52,1 |
| RB1 | MOL005308 | Aposiopolamine                                                                                                                                                  | 83.1305 | -<br>12.12,36.85,22.39,A,40,3<br>-4.92,36.26,29.19,A,71,5                                                     |
| RB1 | MOL005317 | Deoxyharringtonin<br>e                                                                                                                                          | 119.259 | 2.48,34.45,31.39,A,92,22<br>-                                                                                 |

|           |           |                                               |         |                                                                                                                   |
|-----------|-----------|-----------------------------------------------|---------|-------------------------------------------------------------------------------------------------------------------|
| RB1       | MOL005318 | Dianthramine                                  | 74.8458 | -9.72,43.26,24.79,P,48,7<br>-<br>13.32,39.85,21.99,A,33,1<br>-2.32,36.26,29.39,A,73,8                             |
| RB1       | MOL005320 | arachidonate                                  | 113.487 | -<br>4.92,36.26,29.19,A,71,10                                                                                     |
| RB1       | MOL005321 | Frutinone A                                   | 94.0331 | -<br>13.32,39.85,21.99,A,33,3                                                                                     |
| RB1       | MOL005348 | Ginsenoside-<br>Rh4_qt                        | 96.9637 | 0.08,34.45,30.99,A,87,19<br>-<br>3.72,36.85,28.59,A,65,29                                                         |
| RB1       | MOL005356 | Girinimbin                                    | 90.4803 | 10.52,37.05,24.99,A,53,1<br>3<br>-                                                                                |
| RB1       | MOL005376 | Panaxadiol                                    | 71.1091 | 10.52,35.26,26.59,A,57,2<br>9<br>-                                                                                |
| RB1       | MOL005384 | suchilactone                                  | 99.207  | 13.52,33.66,21.19,A,21,1<br>-7.92,33.45,21.99,A,32,2<br>3.88,37.66,28.99,P,61,1                                   |
| RB1       | MOL005399 | alexandrin_qt                                 | 107.808 | -<br>0.92,34.05,29.79,A,76,12                                                                                     |
| RB1       | MOL006331 | 4',5-<br>Dihydroxyflavone                     | 84.7517 | -<br>12.92,38.26,22.19,A,38,8                                                                                     |
| RB1       | MOL008647 | N-Trans-<br>Feruloyltyramine                  | 108.949 | -8.52,37.26,27.99,P,54,3<br>-6.52,36.05,29.19,A,70,7                                                              |
| RB1       | MOL009763 | (+)-Syringaresinol-<br>O-beta-D-<br>glucoside | 106.38  | -<br>3.88,38.45,30.79,P,75,10<br>2.08,37.05,29.99,A,80,32                                                         |
| Caspase-3 | MOL000098 | quercetin                                     | 115.29  | -<br>18.36,-6.01,13.46,A,89,6<br>18.16,-1.41,11.46,A,77,12<br>17.57,1.19,9.06,P,65,19<br>14.96,-1.41,16.66,A,94,4 |
| Caspase-3 | MOL000006 | luteolin                                      | 111.879 | 16.77,0.39,10.06,P,74,20<br>19.16,-0.21,9.06,P,64,21<br>17.36,-0.41,12.86,A,87,6                                  |
| Caspase-3 | MOL000358 | beta-sitosterol                               | 107.789 | 15.56,0.79,17.26,A,95,23<br>21.57,-8.01,6.66,A,38,28<br>15.96,-0.41,15.86,A,91,4                                  |
| Caspase-3 | MOL000359 | sitosterol                                    | 105.495 | 22.57,-8.01,5.26,A,29,19<br>18.96,-<br>18.36,-6.01,13.46,A,89,7                                                   |
| Caspase-3 | MOL000422 | kaempferol                                    | 104.356 | 18.16,-1.41,11.46,A,77,13<br>18.57,-0.81,8.86,A,54,16<br>15.96,-0.41,15.86,A,91,1                                 |
| Caspase-3 | MOL000449 | Stigmasterol                                  | 111.693 | 19.96,-<br>3.81,10.06,A,65,10<br>14.96,-                                                                          |
| Caspase-3 | MOL000622 | Magnograndiolide                              | 65.6427 | 1.41,16.66,A,94,15<br>16.16,0.79,12.06,P,84,18<br>17.36,-                                                         |
| Caspase-3 | MOL000787 | Fumarine                                      | 96.1825 | 0.41,12.86,A,87,10<br>19.36,-0.01,9.86,A,61,12<br>15.56,0.79,17.26,A,95,2                                         |
| Caspase-3 | MOL001510 | 24-epicampesterol                             | 103.811 | 17.36,-0.41,12.86,A,87,8<br>22.96,-7.61,6.86,A,41,26<br>21.96,-8.81,7.66,A,45,24                                  |
| Caspase-3 | MOL001525 | Daucosterol                                   | 92.5653 | 21.57,-7.21,5.66,A,33,27<br>22.96,-9.41,4.06,A,24,28                                                              |

|           |           |                                                                                                                                 |         |                                                                                                             |
|-----------|-----------|---------------------------------------------------------------------------------------------------------------------------------|---------|-------------------------------------------------------------------------------------------------------------|
| Caspase-3 | MOL001645 | Linoleyl acetate                                                                                                                | 117.69  | 17.77,0.19,10.06,A,67,2<br>18.96,-2.21,9.86,A,60,4<br>22.96,-7.61,6.86,A,41,14<br>15.96,-0.41,15.86,A,91,2  |
| Caspase-3 | MOL001771 | poriferast-5-en-3beta-ol                                                                                                        | 109.904 | 18.16,-1.41,11.46,A,77,8<br>22.96,-9.21,6.26,A,36,26<br>14.56,-                                             |
| Caspase-3 | MOL001792 | DFV                                                                                                                             | 103.397 | 3.01,16.46,A,92,13<br>14.37,-                                                                               |
| Caspase-3 | MOL002268 | Rhein                                                                                                                           | 100.773 | 18.57,-0.81,8.86,A,54,8<br>19.96,-2.61,9.46,P,69,15<br>16.36,0.19,13.46,P,89,20<br>18.36,-6.01,13.46,A,89,4 |
| Caspase-3 | MOL002714 | baicalein                                                                                                                       | 87.2431 | 18.96,-2.21,9.86,A,60,17<br>17.77,0.19,10.06,A,67,18<br>19.96,-                                             |
| Caspase-3 | MOL002879 | Diop                                                                                                                            | 114.924 | 3.81,10.06,A,65,14<br>17.36,-                                                                               |
| Caspase-3 | MOL002959 | 3'-Methoxydaidzein                                                                                                              | 102.841 | 18.36,-4.41,13.06,A,88,1<br>19.96,-<br>3.81,10.06,A,65,17<br>17.36,-0.41,12.86,A,87,9                       |
| Caspase-3 | MOL003044 | Chryseriol                                                                                                                      | 96.6152 | 19.16,-0.21,9.06,P,64,12<br>15.56,0.79,17.26,A,95,22<br>17.57,1.19,9.06,P,65,19                             |
| Caspase-3 | MOL003542 | 8-Isopentenyl-kaempferol                                                                                                        | 116.813 | 19.36,-0.01,9.86,A,61,20<br>18.36,-<br>17.77,1.19,9.06,A,57,4                                               |
| Caspase-3 | MOL003648 | Inermin                                                                                                                         | 82.5628 | 18.16,-1.41,11.46,A,77,6<br>18.36,-<br>18.16,-1.41,11.46,A,77,16                                            |
| Caspase-3 | MOL004367 | olivil                                                                                                                          | 122.487 | 18.57,-0.81,8.86,A,54,21<br>21.96,-8.81,7.66,A,45,27<br>16.16,0.79,12.06,P,84,3                             |
| Caspase-3 | MOL004373 | Anhydroicaritin                                                                                                                 | 117.181 | 14.96,-<br>1.41,16.66,A,94,19<br>19.96,-3.81,10.06,A,65,7                                                   |
| Caspase-3 | MOL004380 | C-Homoerythrinan, 1,6-didehydro-                                                                                                | 88.2126 | 18.16,0.99,12.06,P,86,21<br>18.57,-<br>19.96,-                                                              |
| Caspase-3 | MOL004382 | Yinyanghuo A                                                                                                                    | 143.016 | 3.81,10.06,A,65,22<br>21.96,-8.81,7.66,A,45,26<br>18.57,-0.81,8.86,A,54,2                                   |
| Caspase-3 | MOL004384 | Yinyanghuo C                                                                                                                    | 109.118 | 14.96,-<br>1.41,16.66,A,94,13<br>21.57,-8.01,6.66,A,38,3                                                    |
| Caspase-3 | MOL004386 | Yinyanghuo E                                                                                                                    | 113.222 | 18.96,-2.21,9.86,A,60,18<br>17.36,-<br>16.36,0.19,13.46,P,89,19                                             |
| Caspase-3 | MOL004388 | 6-hydroxy-11,12-dimethoxy-2,2-dimethyl-1,8-dioxo-2,3,4,8-tetrahydro-1H-isochromenol[3,4-8-(3-methylbut-2-enyl)-2-phenylchromone | 88.9282 | 18.36,-<br>6.01,13.46,A,89,24<br>17.57,-1.61,9.06,P,63,27                                                   |
| Caspase-3 | MOL004391 | Anhydroicaritin-3-O-alpha-L-rhamnoside                                                                                          | 98.5387 | 19.96,-3.81,10.06,A,65,2<br>17.16,-0.01,11.66,A,81,7<br>14.96,-<br>14.56,-                                  |
| Caspase-3 | MOL004394 | 1,2-bis(4-hydroxy-3-methoxyphenyl)pr                                                                                            | 116.682 | 3.01,16.46,A,92,27<br>19.96,-<br>17.36,-                                                                    |
| Caspase-3 | MOL004396 |                                                                                                                                 | 115.721 | 0.41,12.86,A,87,13<br>17.57,1.19,9.06,P,65,14                                                               |



|           |           |                                       |         |                                                                                        |
|-----------|-----------|---------------------------------------|---------|----------------------------------------------------------------------------------------|
| Caspase-3 | MOL004425 | Icariin                               | 120.936 | 13.16,-<br>2.41,16.66,A,93,25<br>18.16,-1.41,11.46,A,77,28<br>18.96,-2.21,9.86,A,60,29 |
| Caspase-3 | MOL004427 | cariside A7                           | 91.5555 | 19.57,0.39,11.66,P,81,30<br>16.16,0.79,12.06,P,84,33<br>19.36,-0.01,9.86,A,61,2        |
| Caspase-3 | MOL004941 | (2R)-7-hydroxy-2-(4-hydroxyphenyl)chr | 104.101 | 14.96,-<br>1.41,16.66,A,94,15<br>14.96,-1.41,16.66,A,94,5                              |
| Caspase-3 | MOL005308 | Aposiopolamine                        | 99.3928 | 17.77,0.19,10.06,A,67,13<br>16.96,-<br>17.77,1.19,9.06,A,57,1                          |
| Caspase-3 | MOL005317 | Deoxyharringtonine                    | 107.276 | 19.96,-3.81,10.06,A,65,7<br>15.96,-<br>16.96,-1.21,10.06,A,66,11                       |
| Caspase-3 | MOL005318 | Dianthramine                          | 86.7343 | 16.36,0.19,13.46,P,89,15<br>18.57,-2.21,8.06,P,54,21<br>22.96,-9.21,6.26,A,36,10       |
| Caspase-3 | MOL005320 | arachidonate                          | 122.657 | 19.96,-<br>3.81,10.06,A,65,16<br>19.36,-0.01,9.86,A,61,1                               |
| Caspase-3 | MOL005321 | Frutinone A                           | 91.4527 | 18.16,-1.41,11.46,A,77,3<br>18.36,-<br>22.96,-7.61,6.86,A,41,6                         |
| Caspase-3 | MOL005348 | Ginsenoside-Rh4_qt                    | 107.5   | 18.16,-1.41,11.46,A,77,26<br>19.36,-0.01,9.86,A,61,28<br>18.96,-0.01,11.26,A,75,3      |
| Caspase-3 | MOL005356 | Girinimbin                            | 91.2668 | 15.96,-<br>0.41,15.86,A,91,14<br>13.16,-2.41,16.66,A,93,6                              |
| Caspase-3 | MOL005376 | Panaxadiol                            | 79.8059 | 19.96,-<br>3.81,10.06,A,65,20<br>18.57,-7.41,14.46,A,90,1                              |
| Caspase-3 | MOL005384 | suchilactone                          | 101.794 | 18.96,-0.01,11.26,A,75,16<br>16.36,0.19,13.46,P,89,17<br>18.36,-4.41,13.06,A,88,11     |
| Caspase-3 | MOL005399 | alexandrin_qt                         | 98.0734 | 14.56,-<br>3.01,16.46,A,92,22<br>18.57,-7.41,14.46,A,90,1                              |
| Caspase-3 | MOL006331 | 4',5-Dihydroxyflavone                 | 98.2186 | 19.36,-0.01,9.86,A,61,16<br>17.57,1.19,9.06,P,65,17<br>17.57,1.19,9.06,P,65,4          |
| Caspase-3 | MOL008647 | N-Trans-Feruloyltyramine              | 142.441 | 22.96,-7.61,6.86,A,41,12<br>18.16,-<br>19.96,-2.61,9.46,P,69,9                         |
| Caspase-3 | MOL009763 | (+)-Syringaresinol-O-beta-D-glucoside | 143.793 | 18.16,0.99,12.06,P,86,11<br>17.77,-<br>18.57,37.93,-17.80,A,2,6                        |
| Caspase-9 | MOL000098 | quercetin                             | 94.1014 | 20.17,42.13,-<br>12.60,A,14,13<br>18.57,37.93,-17.80,A,2,4                             |
| Caspase-9 | MOL000358 | beta-sitosterol                       | 94.2693 | 21.57,42.93,-<br>12.20,A,20,27<br>17.37,39.13,-18.00,A,1,11                            |
| Caspase-9 | MOL000359 | sitosterol                            | 104.27  | 20.17,42.13,-<br>12.60,A,14,19<br>28.97,29.53,-                                        |
| Caspase-9 | MOL000422 | kaempferol                            | 73.4995 | 5.60,A,60,14<br>30.97,29.73,-<br>18.37,38.93,-11.80,A,23,1                             |
| Caspase-9 | MOL000449 | Stigmasterol                          | 94.1775 | 19.57,37.93,-<br>12.00,A,21,2                                                          |

|           |           |                                                                                                                                  |         |                                                                                                  |
|-----------|-----------|----------------------------------------------------------------------------------------------------------------------------------|---------|--------------------------------------------------------------------------------------------------|
| Caspase-9 | MOL000787 | Fumarine                                                                                                                         | 65.3078 | 19.17,42.73,-17.60,A,3,7<br>18.57,37.93,-<br>17.80,A,2,14<br>17.37,39.13,-                       |
| Caspase-9 | MOL001510 | 24-epicampesterol                                                                                                                | 93.8254 | 18.00,A,1,15<br>20.17,42.13,-<br>30.97,36.13,-                                                   |
| Caspase-9 | MOL001525 | Daucosterol                                                                                                                      | 74.6382 | 13.00,A,13,24<br>33.77,34.53,-<br>33.17,37.33,-                                                  |
| Caspase-9 | MOL001645 | Linoleyl acetate                                                                                                                 | 106.023 | 12.40,A,18,5<br>20.57,37.53,-<br>19.17,42.73,-                                                   |
| Caspase-9 | MOL001771 | poriferast-5-en-3beta-ol                                                                                                         | 107.215 | 17.60,A,3,19<br>20.17,40.93,-<br>18.57,37.93,-17.80,A,2,7                                        |
| Caspase-9 | MOL001792 | DFV                                                                                                                              | 97.364  | 20.17,42.13,-<br>12.60,A,14,14<br>20.17,40.93,-                                                  |
| Caspase-9 | MOL002268 | Rhein                                                                                                                            | 75.9202 | 10.80,A,33,11<br>18.97,41.33,-<br>20.57,37.53,-                                                  |
| Caspase-9 | MOL002714 | baicalein                                                                                                                        | 96.704  | 14.60,P,12,12<br>19.97,42.13,-<br>20.57,42.73,-                                                  |
| Caspase-9 | MOL002879 | Diop                                                                                                                             | 94.8591 | 11.40,A,28,20<br>32.37,36.53,-<br>31.77,37.53,-                                                  |
| Caspase-9 | MOL002959 | 3'-Methoxydaidzein                                                                                                               | 59.2254 | 12.20,A,19,13<br>33.17,35.33,-<br>24.17,40.33,-                                                  |
| Caspase-9 | MOL003044 | Chryseriol                                                                                                                       | 80.9393 | 11.20,P,32,12<br>19.97,42.13,-<br>20.17,40.53,-9.60,P,51,19                                      |
| Caspase-9 | MOL003542 | 8-Isopentenyl-kaempferol                                                                                                         | 88.9453 | 21.57,42.93,-<br>12.20,A,20,21<br>19.97,42.13,-10.40,P,42,3                                      |
| Caspase-9 | MOL003648 | Inermin                                                                                                                          | 85.3909 | 20.97,39.93,-10.40,P,41,5<br>21.57,42.93,-<br>25.57,40.13,-12.20,P,24,3                          |
| Caspase-9 | MOL004367 | olivil                                                                                                                           | 110.652 | 18.97,41.33,-13.40,P,18,4<br>19.97,43.53,-11.80,P,26,6<br>21.57,43.73,-11.00,P,34,4              |
| Caspase-9 | MOL004373 | Anhydroicaritin                                                                                                                  | 107.587 | 19.57,37.93,-<br>12.00,A,21,22<br>19.17,42.73,-                                                  |
| Caspase-9 | MOL004380 | C-Homoerythrinan, 1,6-didehydro-                                                                                                 | 77.4659 | 17.60,A,3,13<br>18.37,38.93,-<br>28.57,34.73,-8.40,P,60,6                                        |
| Caspase-9 | MOL004382 | Yinyanghuo A                                                                                                                     | 109.441 | 33.17,35.33,-<br>13.00,A,12,22<br>33.17,37.33,-                                                  |
| Caspase-9 | MOL004384 | Yinyanghuo C                                                                                                                     | 59.1649 | 12.40,A,18,12<br>29.77,34.93,-<br>17.37,39.13,-                                                  |
| Caspase-9 | MOL004388 | 6-hydroxy-11,12-dimethoxy-2,2-dimethyl-1,8-dioxo-2,3,4,8-tetrahydro-1H-isochromenol[3,4-8-(3-methylbut-2-enyl)-2-phenyl-chromone | 77.9283 | 18.00,A,1,22<br>19.17,42.73,-<br>17.60,A,3,24<br>20.17,42.13,-<br>12.60,A,14,26<br>18.57,37.93,- |
| Caspase-9 | MOL004391 | enyl)-2-phenyl-chromone                                                                                                          | 95.1571 | 17.80,A,2,16<br>19.57,37.93,-                                                                    |

|           |           |                                        |         |                                         |
|-----------|-----------|----------------------------------------|---------|-----------------------------------------|
| Caspase-9 | MOL004394 | Anhydroicaritin-3-O-alpha-L-rhamnoside | 40.6387 | 19.17,42.73,-17.60,A,3,44               |
| Caspase-9 | MOL004396 | 1,2-bis(4-hydroxy-3-methoxyphenyl)pr   | 102.584 | 17.37,39.13,-20.17,42.13,-12.60,A,14,10 |
| Caspase-9 | MOL004427 | Icariside A7                           | 79.8341 | 19.97,42.13,-19.17,42.73,-17.60,A,3,17  |
| Caspase-9 | MOL004941 | (2R)-7-hydroxy-2-(4-hydroxyphenyl)chr  | 72.3115 | 18.97,41.33,-19.17,42.73,-17.60,A,3,8   |
| Caspase-9 | MOL005308 | Aposiopolamine                         | 87.8679 | 17.37,39.13,-18.00,A,1,15               |
| Caspase-9 | MOL005317 | Deoxyharringtonine                     | 80.785  | 18.57,37.93,-17.80,A,2,6                |
| Caspase-9 | MOL005318 | Dianthramine                           | 77.0754 | 20.17,40.93,-10.80,A,33,13              |
| Caspase-9 | MOL005320 | arachidonate                           | 113.423 | 17.37,41.53,-17.80,P,3,14               |
| Caspase-9 | MOL005321 | Frutinone A                            | 88.4255 | 19.77,37.93,-16.20,P,6,21               |
| Caspase-9 | MOL005348 | Ginsenoside-Rh4 <sub>qt</sub>          | 97.3867 | 20.17,42.13,-27.77,30.33,-16.40,A,4,2   |
| Caspase-9 | MOL005384 | suchilactone                           | 99.6169 | 26.97,29.53,-14.40,P,14,7               |
| Caspase-9 | MOL005399 | alexandrin <sub>qt</sub>               | 97.2948 | 21.77,31.33,-15.20,P,9,15               |
| Caspase-9 | MOL006331 | 4',5-Dihydroxyflavone                  | 80.55   | 32.37,36.53,-13.60,A,11,4               |
| Caspase-9 | MOL008647 | N-Trans-Feruloyltyramine               | 105.421 | 31.77,33.13,-10.60,A,34,6               |
| Caspase-9 | MOL009763 | (+)-Syringaresinol-O-beta-D-glucoside  | 132.387 | 19.97,42.13,-10.40,P,42,13              |
| Caspase-8 | MOL000098 | quercetin                              | 103.368 | 18.37,38.93,-19.17,42.73,-17.60,A,3,17  |
| Caspase-8 | MOL000006 | luteolin                               | 106.153 | 20.17,42.13,-20.17,40.93,-10.80,A,33,1  |
| Caspase-8 | MOL000358 | beta-sitosterol                        | 111.787 | 18.17,37.73,-12.20,P,22,3               |
| Caspase-8 | MOL000359 | sitosterol                             | 115.16  | 16.37,38.73,-18.00,P,2,1                |
| Caspase-8 | MOL000422 | kaempferol                             | 96.8411 | 18.57,37.93,-17.80,A,2,20               |
| Caspase-8 | MOL000449 | Stigmasterol                           | 104.99  | 31.17,28.33,-4.40,A,76,13               |

|           |           |                                  |         |                                                                                        |
|-----------|-----------|----------------------------------|---------|----------------------------------------------------------------------------------------|
| Caspase-8 | MOL000622 | Magnograndiolide                 | 77.9999 | -9.11,33.92,40.56,A,71,5<br>-<br>8.91,32.12,43.96,A,86,16<br>-12.11,33.72,42.36,A,81,4 |
| Caspase-8 | MOL000787 | Fumarine                         | 99.9685 | -<br>12.31,31.52,46.36,A,99,1<br>-8.91,32.12,43.96,A,86,8                              |
| Caspase-8 | MOL001510 | 24-epicampesterol                | 98.4481 | -<br>7.31,27.92,44.96,A,91,16<br>-                                                     |
| Caspase-8 | MOL001525 | Daucosterol                      | 98.0274 | 10.91,33.32,41.16,A,74,9<br>-<br>-                                                     |
| Caspase-8 | MOL001645 | Linoleyl acetate                 | 116.502 | 10.91,29.72,46.36,A,98,3<br>-9.11,33.92,40.56,A,71,19<br>-                             |
| Caspase-8 | MOL001771 | poriferast-5-en-3beta-ol         | 103.293 | 7.91,31.52,45.56,A,96,14<br>-<br>-9.11,35.72,37.96,A,61,7                              |
| Caspase-8 | MOL001792 | DFV                              | 103.127 | -<br>9.51,33.12,42.36,A,80,17<br>-8.71,33.92,36.76,A,46,11                             |
| Caspase-8 | MOL002268 | Rhein                            | 93.4428 | -8.11,33.32,39.36,P,69,20<br>-<br>-9.11,35.72,37.96,A,61,4                             |
| Caspase-8 | MOL002714 | baicalein                        | 91.6477 | -7.31,34.32,42.16,P,86,12<br>-8.51,35.32,35.76,P,37,14<br>-6.31,34.52,37.76,A,59,4     |
| Caspase-8 | MOL002879 | Diop                             | 115.129 | -7.71,36.32,36.56,A,45,6<br>-<br>-12.11,33.72,42.36,A,81,1                             |
| Caspase-8 | MOL002959 | 3'-Methoxydaidzein               | 105.945 | -<br>13.71,32.52,45.36,A,93,8<br>-8.91,32.12,43.96,A,86,4                              |
| Caspase-8 | MOL003044 | Chryseriol                       | 108.496 | -<br>7.31,33.52,37.76,A,58,18<br>-9.11,33.92,40.56,A,71,16                             |
| Caspase-8 | MOL003542 | 8-Isopentenyl-kaempferol         | 109.953 | -6.51,33.92,37.76,P,58,19<br>-<br>-9.91,36.72,36.36,A,42,4                             |
| Caspase-8 | MOL003648 | Inermin                          | 100.395 | -8.51,34.12,38.76,A,63,9<br>-<br>-7.91,36.72,36.36,P,45,4                              |
| Caspase-8 | MOL004367 | olivil                           | 124.11  | -<br>9.51,33.12,42.36,A,80,13<br>-9.11,33.92,40.56,A,71,21                             |
| Caspase-8 | MOL004373 | Anhydroicaritin                  | 115.088 | -<br>9.51,29.92,45.56,A,95,26<br>-                                                     |
| Caspase-8 | MOL004380 | C-Homoerythrinan, 1,6-didehydro- | 85.7481 | 12.31,31.52,46.36,A,99,7<br>-<br>-5.91,33.92,35.36,P,30,6                              |
| Caspase-8 | MOL004382 | Yinyanghuo A                     | 136.578 | -<br>8.91,32.12,43.96,A,86,15<br>-8.71,33.92,36.76,A,46,3                              |
| Caspase-8 | MOL004384 | Yinyanghuo C                     | 112.454 | -<br>8.91,32.12,43.96,A,86,18<br>-8.71,33.92,36.76,A,46,3                              |
| Caspase-8 | MOL004386 | Yinyanghuo E                     | 114.48  | -<br>8.91,32.12,43.96,A,86,18                                                          |

|           |           |                                                                                                                                  |         |                                                                                                                    |
|-----------|-----------|----------------------------------------------------------------------------------------------------------------------------------|---------|--------------------------------------------------------------------------------------------------------------------|
| Caspase-8 | MOL004388 | 6-hydroxy-11,12-dimethoxy-2,2-dimethyl-1,8-dioxo-2,3,4,8-tetrahydro-1H-isochromenol[3,4-8-(3-methylbut-2-enyl)-2-phenyl-chromone | 83.764  | -6.51,33.92,37.76,P,58,19<br>-<br>13.71,33.32,41.96,A,77,2<br>1<br>-                                               |
| Caspase-8 | MOL004391 | Anhydroicaritin-3-O-alpha-L-rhamnoside                                                                                           | 96.0478 | 11.51,38.32,35.56,A,33,2<br>-                                                                                      |
| Caspase-8 | MOL004394 | 1,2-bis(4-hydroxy-3-methoxyphenyl)pr                                                                                             | 131.727 | 12.11,40.12,35.16,A,31,1<br>7<br>-                                                                                 |
| Caspase-8 | MOL004396 | Icariin                                                                                                                          | 111.833 | 3.51,24.12,41.56,A,75,27<br>-                                                                                      |
| Caspase-8 | MOL004425 | Icariside A7                                                                                                                     | 93.3796 | 13.51,33.32,43.56,A,85,1<br>0<br>-                                                                                 |
| Caspase-8 | MOL004427 | (2R)-7-hydroxy-2-(4-hydroxyphenyl)chr                                                                                            | 110.125 | 5.31,38.32,44.16,A,89,20<br>-                                                                                      |
| Caspase-8 | MOL004941 | Aposiopolamine                                                                                                                   | 101.064 | 8.91,28.52,44.96,A,92,14<br>-                                                                                      |
| Caspase-8 | MOL005308 | Deoxyharringtonine                                                                                                               | 94.9543 | -9.11,35.72,37.96,A,61,2<br>-                                                                                      |
| Caspase-8 | MOL005317 | Dianthramine                                                                                                                     | 126.376 | 14.71,41.12,34.96,A,28,1<br>-                                                                                      |
| Caspase-8 | MOL005318 | arachidonate                                                                                                                     | 95.8557 | 7.31,33.52,37.76,A,58,12<br>-                                                                                      |
| Caspase-8 | MOL005320 | Frutinone A                                                                                                                      | 115.328 | 12.91,42.12,35.56,A,34,1<br>-                                                                                      |
| Caspase-8 | MOL005321 | Ginsenoside-Rh4 <sub>qt</sub>                                                                                                    | 84.7428 | 7.51,35.92,37.76,A,60,12<br>-                                                                                      |
| Caspase-8 | MOL005348 | Girinimbin                                                                                                                       | 88.1552 | 8.51,30.32,44.56,A,90,12<br>-9.11,35.72,37.96,A,61,19<br>-9.91,36.72,36.36,A,42,1<br>-8.91,35.72,36.36,A,41,2<br>- |
| Caspase-8 | MOL005356 | Panaxadiol                                                                                                                       | 86.0786 | 7.91,31.52,45.56,A,96,14<br>-                                                                                      |
| Caspase-8 | MOL005376 | suchilactone                                                                                                                     | 101.391 | -7.51,35.92,37.76,A,60,2<br>-                                                                                      |
| Caspase-8 | MOL005384 | alexandrin <sub>qt</sub>                                                                                                         | 109.807 | 12.11,33.72,42.36,A,81,1<br>-                                                                                      |
| Caspase-8 | MOL006331 | 4',5-Dihydroxyflavone                                                                                                            | 94.7976 | 8.91,28.52,44.96,A,92,20<br>-                                                                                      |
| Caspase-8 | MOL008647 | N-Trans-Feruloyltyramine                                                                                                         | 129.882 | -8.91,28.52,44.96,A,92,1<br>-                                                                                      |
| Caspase-8 | MOL009763 | (+)-Syringaresinol-O-beta-D-glucoside                                                                                            | 139.36  | 10.91,33.32,41.16,A,74,1<br>-                                                                                      |
|           |           |                                                                                                                                  |         | 8.51,30.32,44.56,A,90,17<br>-                                                                                      |
|           |           |                                                                                                                                  |         | -8.91,32.12,43.96,A,86,6<br>-                                                                                      |
|           |           |                                                                                                                                  |         | 7.31,33.52,37.76,A,58,14<br>-7.11,34.32,35.36,P,31,4<br>-                                                          |
|           |           |                                                                                                                                  |         | 12.31,31.52,46.36,A,99,9<br>-6.51,33.92,37.76,P,58,11<br>-8.51,35.32,35.76,P,37,13<br>-                            |

|     |           |                          |         |                                                                                                              |
|-----|-----------|--------------------------|---------|--------------------------------------------------------------------------------------------------------------|
| BAX | MOL000098 | quercetin                | 84.832  | 7.76,-29.68,-1.15,A,43,2<br>5.76,-35.28,3.45,A,75,12<br>6.16,-37.08,6.45,P,55,19<br>6.76,-29.88,0.25,A,53,11 |
| BAX | MOL000006 | luteolin                 | 88.1813 | 7.56,-36.68,5.85,A,84,18<br>6.36,-37.28,7.85,P,65,21<br>8.36,-30.28,0.85,A,56,9                              |
| BAX | MOL000358 | beta-sitosterol          | 107.24  | 4.36,-31.88,1.25,A,58,19<br>6.16,-35.68,5.65,A,83,28<br>3.76,-33.08,0.65,A,54,15                             |
| BAX | MOL000359 | sitosterol               | 102.413 | 4.56,-34.48,4.25,A,78,18<br>8.36,-30.28,0.85,A,56,22<br>7.76,-29.68,-1.15,A,43,9                             |
| BAX | MOL000422 | kaempferol               | 84.2762 | 5.76,-35.28,3.45,A,75,17<br>6.16,-37.08,6.45,P,55,18<br>8.16,-27.08,1.25,A,59,7                              |
| BAX | MOL000449 | Stigmasterol             | 101.685 | 3.36,-32.48,2.45,A,68,22<br>7.76,-31.28,2.05,A,66,24<br>6.16,-30.08,-1.35,A,40,8                             |
| BAX | MOL000622 | Magnograndiolide         | 69.8422 | 4.76,-29.48,-0.95,A,44,9<br>6.76,-28.88,1.65,A,63,16<br>6.56,-32.28,2.65,A,70,4                              |
| BAX | MOL000787 | Fumarine                 | 93.4325 | 5.96,-28.88,-0.35,A,49,12<br>8.36,-35.08,9.45,A,96,26<br>7.76,-29.68,-1.15,A,43,13                           |
| BAX | MOL001510 | 24-epicampesterol        | 103.078 | 6.16,-35.68,5.65,A,83,26<br>4.36,-30.48,1.45,A,61,27<br>4.76,-29.48,-0.95,A,44,7                             |
| BAX | MOL001525 | Daucosterol              | 96.7948 | 7.96,-28.28,0.65,A,55,11<br>3.56,-34.68,2.85,A,71,19<br>4.96,-29.48,0.85,A,57,4                              |
| BAX | MOL001645 | Linoleyl acetate         | 101.26  | 4.56,-34.48,4.25,A,78,10<br>7.56,-36.68,5.85,A,84,17<br>8.16,-27.08,1.25,A,59,8                              |
| BAX | MOL001771 | poriferast-5-en-3beta-ol | 104.408 | 7.56,-36.68,5.85,A,84,26<br>3.36,-32.48,2.45,A,68,27<br>2.76,-20.28,4.85,A,80,10                             |
| BAX | MOL001792 | DFV                      | 98.4017 | -2.24,-20.88,9.05,A,94,14<br>2.36,-24.08,4.45,P,50,19<br>0.76,-22.68,10.05,P,82,15                           |
| BAX | MOL002268 | Rhein                    | 91.2653 | -2.84,-19.48,8.45,A,92,17<br>5.56,-21.88,8.85,P,73,21<br>4.96,-33.28,3.05,A,73,11                            |
| BAX | MOL002714 | baicalein                | 80.183  | 6.36,-37.28,7.85,P,65,15<br>7.76,-31.28,2.05,A,66,17<br>5.96,-28.88,-0.35,A,49,3                             |
| BAX | MOL002879 | Diop                     | 88.6331 | 3.96,-30.28,-0.75,A,45,5<br>7.76,-35.48,8.25,A,90,27<br>5.76,-35.28,3.45,A,75,1                              |
| BAX | MOL002959 | 3'-Methoxydaidzein       | 89.2194 | 7.76,-35.28,6.65,A,86,8<br>6.76,-29.88,0.25,A,53,19<br>6.56,-32.28,2.65,A,70,9                               |
| BAX | MOL003044 | Chryseriol               | 89.3009 | 3.36,-29.08,-2.15,P,33,14<br>3.56,-34.68,2.85,A,71,16<br>6.76,-29.88,0.25,A,53,9                             |
| BAX | MOL003542 | 8-Isopentenyl-kaempferol | 100.364 | 6.36,-37.28,7.85,P,65,19<br>7.56,-36.68,5.85,A,84,20<br>7.76,-29.68,-1.15,A,43,4                             |
| BAX | MOL003648 | Inermin                  | 83.1698 | 7.76,-31.28,2.05,A,66,9<br>4.96,-33.28,3.05,A,73,10<br>8.56,-31.28,9.45,P,77,4                               |
| BAX | MOL004367 | olivil                   | 105.651 | 6.16,-35.68,5.65,A,83,11<br>7.76,-31.28,2.05,A,66,24                                                         |

|     |           |                                                                                                                                                                  |         |                                                                                                                                        |
|-----|-----------|------------------------------------------------------------------------------------------------------------------------------------------------------------------|---------|----------------------------------------------------------------------------------------------------------------------------------------|
| BAX | MOL004373 | Anhydroicaritin                                                                                                                                                  | 99.6021 | 6.16,-37.08,6.45,P,55,6<br>5.96,-28.88,-0.35,A,49,17<br>5.76,-35.28,3.45,A,75,19<br>3.76,-33.08,0.65,A,54,8                            |
| BAX | MOL004380 | C-<br>Homoerythrinan,<br>1,6-didehydro-                                                                                                                          | 79.319  | 4.56,-34.48,4.25,A,78,16<br>6.16,-35.68,5.65,A,83,18<br>5.36,-28.68,1.65,A,64,11                                                       |
| BAX | MOL004382 | Yinyanghuo A                                                                                                                                                     | 113.828 | 4.96,-33.28,3.05,A,73,18<br>4.16,-28.48,-1.35,A,41,27<br>6.16,-37.08,6.45,P,55,21                                                      |
| BAX | MOL004384 | Yinyanghuo C                                                                                                                                                     | 90.996  | 6.76,-29.88,0.25,A,53,23<br>4.76,-29.48,-0.95,A,44,25<br>8.36,-30.28,0.85,A,56,14                                                      |
| BAX | MOL004386 | Yinyanghuo E                                                                                                                                                     | 96.9356 | 4.96,-30.88,0.05,A,51,23<br>3.76,-33.08,0.65,A,54,25                                                                                   |
| BAX | MOL004388 | 6-hydroxy-11,12-<br>dimethoxy-2,2-<br>dimethyl-1,8-<br>dioxo-2,3,4,8-<br>tetrahydro-1H-<br>isochromenol[3,4-<br>8-(3-methylbut-2-<br>enyl)-2-phenyl-<br>chromone | 83.7921 | 6.56,-32.28,2.65,A,70,10<br>4.96,-29.48,0.85,A,57,22<br>8.16,-27.08,1.25,A,59,24<br>3.96,-19.68,5.25,A,82,6<br>2.76,-20.28,4.85,A,80,7 |
| BAX | MOL004391 | Anhydroicaritin-3-<br>O-alpha-L-<br>rhamnoside                                                                                                                   | 98.3812 | -2.84,-19.48,8.45,A,92,22<br>6.36,-37.28,7.85,P,65,28                                                                                  |
| BAX | MOL004394 | 1,2-bis(4-hydroxy-<br>3-<br>methoxyphenyl)pr                                                                                                                     | 124.82  | 7.76,-31.28,2.05,A,66,32<br>3.56,-34.68,2.85,A,71,45<br>8.56,-31.28,9.45,P,77,4                                                        |
| BAX | MOL004396 |                                                                                                                                                                  | 88.0687 | 7.76,-35.48,8.25,A,90,10<br>5.36,-34.48,12.05,P,93,21<br>7.76,-31.28,2.05,A,66,21                                                      |
| BAX | MOL004425 | Icariin                                                                                                                                                          | 101.648 | 6.76,-34.88,11.25,P,87,46<br>7.56,-28.28,-0.75,A,46,47<br>6.16,-30.88,1.45,A,60,10                                                     |
| BAX | MOL004427 | Icariside A7                                                                                                                                                     | 81.5559 | 7.56,-36.68,5.85,A,84,27<br>6.16,-35.68,7.45,P,61,32<br>2.56,-21.08,3.65,A,76,2                                                        |
| BAX | MOL004941 | (2R)-7-hydroxy-2-<br>(4-<br>hydroxyphenyl)chr                                                                                                                    | 81.3849 | 0.36,-22.48,9.65,A,97,15<br>0.96,-20.28,2.25,P,41,19<br>10.76,-28.28,-6.95,A,21,1                                                      |
| BAX | MOL005308 | Aposiopolamine                                                                                                                                                   | 75.1408 | 7.76,-29.68,-1.15,A,43,11<br>6.76,-28.88,1.65,A,63,16<br>7.76,-35.28,6.65,A,86,22                                                      |
| BAX | MOL005317 | Deoxyharringtonin<br>e                                                                                                                                           | 107.836 | 4.36,-31.88,1.25,A,58,32<br>3.56,-34.68,2.85,A,71,35<br>3.56,-34.68,2.85,A,71,3                                                        |
| BAX | MOL005318 | Dianthramine                                                                                                                                                     | 71.2661 | 5.96,-28.88,-0.35,A,49,12<br>4.36,-34.48,5.45,P,52,19<br>4.76,-29.48,-0.95,A,44,8                                                      |
| BAX | MOL005320 | arachidonate                                                                                                                                                     | 106.027 | 6.56,-32.28,2.65,A,70,12<br>8.36,-31.48,10.85,P,85,21<br>7.76,-35.48,8.25,A,90,6                                                       |
| BAX | MOL005321 | Frutinone A                                                                                                                                                      | 78.2474 | 4.56,-34.48,4.25,A,78,14<br>6.16,-30.88,1.45,A,60,17<br>8.16,-27.08,1.25,A,59,16                                                       |
| BAX | MOL005348 | Ginsenoside-<br>Rh4 <sub>qt</sub>                                                                                                                                | 102.156 | 6.76,-29.88,0.25,A,53,19<br>7.76,-31.28,2.05,A,66,26<br>7.76,-35.28,6.65,A,86,1                                                        |
| BAX | MOL005356 | Girinimbin                                                                                                                                                       | 81.0246 | 6.76,-29.88,0.25,A,53,15<br>4.76,-29.48,-0.95,A,44,20<br>7.76,-35.48,8.25,A,90,7                                                       |
| BAX | MOL005376 | Panaxadiol                                                                                                                                                       | 89.8061 | 4.96,-30.88,0.05,A,51,20<br>6.76,-28.88,1.65,A,63,30                                                                                   |

|      |           |                                       |         |                                                                                                             |
|------|-----------|---------------------------------------|---------|-------------------------------------------------------------------------------------------------------------|
| BAX  | MOL005384 | suchilactone                          | 88.5185 | 4.76,-29.48,-0.95,A,44,2<br>8.36,-30.28,0.85,A,56,8<br>6.76,-36.28,7.25,A,88,21<br>7.56,-36.68,5.85,A,84,12 |
| BAX  | MOL005399 | alexandrin_qt                         | 104.83  | 5.36,-28.68,1.65,A,64,27<br>4.16,-28.48,-1.35,A,41,28<br>4.76,-29.48,-0.95,A,44,2                           |
| BAX  | MOL006331 | 4',5-Dihydroxyflavone                 | 79.9819 | 4.56,-34.48,4.25,A,78,13<br>6.16,-37.08,6.45,P,55,17<br>7.76,-35.28,6.65,A,86,7                             |
| BAX  | MOL008647 | N-Trans-Feruloyltyramine              | 94.5218 | 4.96,-33.28,3.05,A,73,16<br>4.36,-31.88,1.25,A,58,20<br>7.76,-35.48,8.25,A,90,19                            |
| BAX  | MOL009763 | (+)-Syringaresinol-O-beta-D-glucoside | 124.036 | 4.36,-30.48,1.45,A,61,32<br>7.96,-28.28,0.65,A,55,37<br>8.06,7.72,-5.90,A,10,16                             |
| Bcl2 | MOL000098 | quercetin                             | 83.8346 | 9.06,5.32,-5.30,P,33,20<br>5.66,8.12,-5.90,P,29,21<br>5.06,-10.08,-8.90,A,3,4                               |
| Bcl2 | MOL000006 | luteolin                              | 77.1073 | 4.06,-3.88,-7.70,A,4,18<br>4.86,-1.88,-6.70,P,23,21<br>9.26,6.32,-4.30,A,16,13                              |
| Bcl2 | MOL000358 | beta-sitosterol                       | 112.64  | 8.06,7.72,-5.90,A,10,20<br>17.26,-0.88,2.70,A,37,28<br>9.26,6.32,-4.30,A,16,15                              |
| Bcl2 | MOL000359 | sitosterol                            | 103.135 | 10.66,5.72,-1.50,A,20,20<br>8.06,7.72,-5.90,A,10,28<br>4.26,-2.48,-7.50,A,5,9                               |
| Bcl2 | MOL000422 | kaempferol                            | 96.9172 | 7.66,-3.48,-5.10,P,36,11<br>8.86,-5.88,-6.10,P,27,21<br>4.26,-2.48,-7.50,A,5,1                              |
| Bcl2 | MOL000449 | Stigmasterol                          | 110.795 | 7.06,-3.88,-5.70,A,13,6<br>8.26,-4.88,-5.70,A,11,7<br>13.06,-7.08,0.50,A,26,9                               |
| Bcl2 | MOL000622 | Magnograndiolide                      | 65.022  | 13.46,-9.08,5.90,A,65,12<br>17.46,-7.08,0.70,A,27,16<br>17.46,-7.08,0.70,A,27,15                            |
| Bcl2 | MOL000787 | Fumarine                              | 101.893 | 14.06,-7.48,1.70,A,34,18<br>10.46,-7.28,5.10,P,71,25<br>9.26,6.32,-4.30,A,16,21                             |
| Bcl2 | MOL001510 | 24-epicampesterol                     | 103.223 | 10.66,5.72,-1.50,A,20,27<br>8.06,7.72,-5.90,A,10,28<br>9.26,6.32,-4.30,A,16,21                              |
| Bcl2 | MOL001510 | 24-epicampesterol                     | 103.223 | 10.66,5.72,-1.50,A,20,27<br>8.06,7.72,-5.90,A,10,28<br>12.86,-9.28,2.50,A,36,4                              |
| Bcl2 | MOL001645 | Linoleyl acetate                      | 112.766 | 16.06,-7.48,1.50,A,33,7<br>17.26,-3.08,11.50,P,97,21<br>17.46,-7.08,0.70,A,27,27                            |
| Bcl2 | MOL001771 | poriferast-5-en-3beta-ol              | 100.868 | 12.06,-<br>10.28,1.10,A,29,29<br>14.06,-7.48,1.70,A,34,7                                                    |
| Bcl2 | MOL001792 | DFV                                   | 77.3364 | 12.86,-9.28,2.50,A,36,9<br>12.06,-7.88,0.70,P,62,19<br>4.06,-6.88,-9.70,P,4,15                              |
| Bcl2 | MOL002268 | Rhein                                 | 81.2143 | 4.06,-3.28,-6.30,A,9,17<br>8.86,-5.88,-6.10,P,27,20<br>8.26,-4.88,-5.70,A,11,4                              |
| Bcl2 | MOL002714 | baicalein                             | 85.5592 | 7.06,-4.88,-10.10,P,2,12<br>7.66,-3.28,-4.30,P,45,14<br>17.26,-2.08,11.30,A,98,20                           |
| Bcl2 | MOL002879 | Diop                                  | 104.877 | 17.46,-7.08,0.70,A,27,22<br>12.26,-7.88,4.70,A,52,27                                                        |



|      |           |                                                                                                                                                                  |         |                                                                                                            |
|------|-----------|------------------------------------------------------------------------------------------------------------------------------------------------------------------|---------|------------------------------------------------------------------------------------------------------------|
| Bcl2 | MOL002959 | 3'-<br>Methoxydaidzein                                                                                                                                           | 88.228  | 5.46,-2.48,-6.50,A,7,6<br>4.06,-3.88,-7.70,A,4,8<br>8.86,-5.08,-7.30,P,19,11<br>8.06,-5.08,-5.50,P,31,10   |
| Bcl2 | MOL003044 | Chryseriol                                                                                                                                                       | 78.9466 | 7.26,-2.68,-6.50,P,24,12<br>4.06,-11.08,-9.50,A,1,22<br>17.06,-0.48,5.10,P,72,19                           |
| Bcl2 | MOL003542 | 8-Isopentenyl-<br>kaempferol                                                                                                                                     | 92.8198 | 14.06,-8.08,4.50,A,49,22<br>14.06,-7.48,1.70,A,34,26<br>8.86,-5.08,-7.30,P,19,12                           |
| Bcl2 | MOL003648 | Inermin                                                                                                                                                          | 97.907  | 4.06,-3.88,-7.70,A,4,17<br>5.46,-2.48,-6.50,A,7,19<br>9.26,-7.08,-4.90,P,38,1                              |
| Bcl2 | MOL004367 | olivil                                                                                                                                                           | 107.683 | 5.86,-2.68,-8.10,P,13,6<br>5.06,-10.08,-8.90,A,3,27<br>12.26,-7.88,4.70,A,52,21                            |
| Bcl2 | MOL004373 | Anhydroicaritin                                                                                                                                                  | 101.112 | 17.46,-7.08,0.70,A,27,25<br>10.26,-6.88,7.30,A,84,27<br>17.46,-7.08,0.70,A,27,9                            |
| Bcl2 | MOL004380 | C-<br>Homoerythrinan,<br>1,6-didehydro-                                                                                                                          | 72.5927 | 14.06,-8.08,4.50,A,49,18<br>12.86,-9.28,2.50,A,36,24<br>17.46,-7.08,0.70,A,27,19                           |
| Bcl2 | MOL004382 | Yinyanghuo A                                                                                                                                                     | 114.927 | 17.26,-0.88,2.70,A,37,26<br>16.06,-2.48,4.30,A,47,27<br>17.26,-8.48,1.50,A,32,13                           |
| Bcl2 | MOL004384 | Yinyanghuo C                                                                                                                                                     | 82.8389 | 14.06,-8.08,4.50,A,49,23<br>12.86,-9.28,2.50,A,36,25<br>8.66,-4.08,-6.30,P,25,22                           |
| Bcl2 | MOL004386 | Yinyanghuo E                                                                                                                                                     | 102.841 | 4.26,-2.48,-7.50,A,5,25<br>4.06,-4.28,-5.70,A,12,26                                                        |
| Bcl2 | MOL004388 | 6-hydroxy-11,12-<br>dimethoxy-2,2-<br>dimethyl-1,8-<br>dioxo-2,3,4,8-<br>tetrahydro-1H-<br>isochromenol[3,4-<br>8-(3-methylbut-2-<br>enyl)-2-phenyl-<br>chromone | 34.6675 | 16.06,-2.48,4.30,A,47,12<br>16.06,-7.48,1.50,A,33,21<br>17.06,-0.48,5.10,P,72,27                           |
| Bcl2 | MOL004391 | Anhydroicaritin-3-<br>O-alpha-L-<br>rhamnoside                                                                                                                   | 90.8299 | 14.66,-9.88,5.10,A,55,2<br>11.06,-8.48,6.70,A,77,14<br>16.06,-2.48,4.30,A,47,21<br>15.26,-8.08,6.70,P,77,8 |
| Bcl2 | MOL004394 | 1,2-bis(4-hydroxy-<br>3-<br>methoxyphenyl)pr                                                                                                                     | 109.645 | 17.26,-0.88,2.70,A,37,26<br>16.06,-2.48,4.30,A,47,27<br>16.06,-7.48,1.50,A,33,3                            |
| Bcl2 | MOL004396 | 3-<br>methoxyphenyl)pr                                                                                                                                           | 105.742 | 14.66,-9.88,5.10,A,55,10<br>11.26,-7.28,5.30,A,60,13<br>5.06,-10.08,-8.90,A,3,17                           |
| Bcl2 | MOL004427 | Icariside A7                                                                                                                                                     | 88.3736 | 7.66,-3.48,-5.10,P,36,31<br>6.26,-1.48,-7.50,P,18,32<br>13.46,-9.08,5.90,A,65,1                            |
| Bcl2 | MOL004941 | (2R)-7-hydroxy-2-<br>(4-<br>hydroxyphenyl)chr                                                                                                                    | 87.7389 | 17.26,-8.48,1.50,A,32,12<br>10.46,-7.28,5.10,P,71,19<br>10.86,8.12,4.10,A,45,2                             |
| Bcl2 | MOL005308 | Aposiopolamine                                                                                                                                                   | 94.1829 | 10.66,9.92,5.70,A,64,6<br>5.46,5.12,6.50,A,75,11<br>17.46,-2.48,9.50,P,84,14                               |
| Bcl2 | MOL005317 | Deoxyharringtonin<br>e                                                                                                                                           | 91.5761 | 16.06,-1.68,3.10,A,40,22<br>17.26,-8.48,1.50,A,32,32<br>4.06,-3.88,-7.70,A,4,3                             |
| Bcl2 | MOL005318 | Dianthramine                                                                                                                                                     | 84.6251 | 7.26,-2.68,-6.50,P,24,7<br>4.06,-6.88,-9.70,P,4,18<br>14.66,-9.88,5.10,A,55,3                              |
| Bcl2 | MOL005320 | arachidonate                                                                                                                                                     | 114.073 | 12.26,-7.88,4.70,A,52,6<br>17.26,-3.08,11.50,P,97,22                                                       |

|      |           |                                               |         |                                                                                                            |
|------|-----------|-----------------------------------------------|---------|------------------------------------------------------------------------------------------------------------|
| Bcl2 | MOL005321 | Frutinone A                                   | 86.5979 | 4.06,-3.28,-6.30,A,9,2<br>9.86,-8.08,-4.10,A,18,16<br>7.06,-4.88,-10.10,P,2,19<br>17.46,-7.08,0.70,A,27,24 |
| Bcl2 | MOL005348 | Ginsenoside-<br>Rh4_qt                        | 103.031 | 12.26,-7.88,4.70,A,52,26<br>11.06,-8.48,6.70,A,77,28<br>14.06,-8.08,4.50,A,49,14                           |
| Bcl2 | MOL005356 | Girinimbin                                    | 66.9315 | 17.46,-7.08,0.70,A,27,18<br>12.66,-8.08,1.30,A,31,20<br>17.26,-8.48,1.50,A,32,16                           |
| Bcl2 | MOL005376 | Panaxadiol                                    | 72.0105 | 14.46,-9.08,2.90,A,38,18<br>12.66,-8.08,1.30,A,31,21<br>16.06,-2.48,4.30,A,47,1                            |
| Bcl2 | MOL005384 | suchilactone                                  | 97.9435 | 17.46,-7.08,0.70,A,27,11<br>13.46,-9.08,5.90,A,65,21<br>16.06,-1.68,3.10,A,40,18                           |
| Bcl2 | MOL005399 | alexandrin_qt                                 | 105.659 | 12.86,-7.88,3.10,A,39,27<br>11.86,-8.68,6.10,A,69,28<br>5.06,-10.08,-8.90,A,3,6                            |
| Bcl2 | MOL006331 | 4',5-<br>Dihydroxyflavone                     | 71.597  | 4.06,-3.88,-7.70,A,4,14<br>4.86,-1.88,-6.70,P,23,17<br>16.86,-1.88,10.70,P,89,2                            |
| Bcl2 | MOL008647 | N-Trans-<br>Feruloyltyramine                  | 113.617 | 12.86,-9.28,2.50,A,36,22<br>11.06,-8.48,6.70,A,77,23<br>15.26,-8.08,6.70,P,77,9                            |
| Bcl2 | MOL009763 | (+)-Syringaresinol-<br>O-beta-D-<br>glucoside | 106.571 | 14.06,-7.48,1.70,A,34,37<br>17.46,-7.08,0.70,A,27,39                                                       |
